# Supplementary material for: Divergent recovery trajectories of intertidal and subtidal coral communities highlight habitat-specific recovery dynamics following bleaching in an extreme macrotidal reef environment
Source: PeerJ. 2023 Sep 15;11:e15987. doi: 10.7717/peerj.15987 (PMC10506583; doi:10.7717/peerj.15987)
Supplement: Supplemental Information 2 [file peerj-11-15987-s002.xlsx]

## Sheet: Read Me
Sea surface temperature data obtained from in situ data loggers
Manuscript: "Divergent recovery trajectories of intertidal and subtidal coral communities highlight habitat-specific recovery dynamics following bleaching in an extreme macrotidal reef environment
Authors: Elias Speelman, Michael Parger, Verena Schoepf
Submitted to PeerJ
all temperatures are in degrees Celsius
Sheet "Logger temperature data"
Time: local time at the study site (Australian Western Standard Time; GMT +8)
IT = intertidal zone
ST = subtidal zone
IT1, IT2 = logger 1 and 2 deployed in the intertidal
ST1, ST2 = logger 1 and 2 deployed in the subtidal
ITAvg, STAvg = average temperature of the two loggers in each zone at a given time point
average temperature and standard deviation for each zone across the entire study period are calculated in the sheet "average temp and stdev"
Sheets "Daily temp range"
abbreviations as above
Difference = the difference between the mininum and maximum temperature measured on a given day = daily temperature range
DTR = daily temperature range
IT1 Mean, IT2 Mean, ST1 Mean, ST2 Mean = average daily temperature for intertidal logger 1, intertidal logger 2, subtidal logger 1 and subtidal logger 2, respectively
Sheet "w > MMM"
w > MMM: all positive weekly temperature anomalies exceeding the MMM over a period of 12 weeks were accumulated, resulting in a metric termed w > MMM (see Methods in the manuscript)
IT1, IT2, ST1, ST2 = weekly average temperatures for intertidal logger 1, intertidal logger 2, subtidal logger 1 and subtidal logger 2, respectively
Mean IT, Mean ST = average weekly temperature for intertidal and subtidal (average of the two loggers for each zone)
Hotspot IT, Hotspot ST = weekly average temperature minus the MMM temperature in the intertidal and subtidal
MMM = local maximum monthly mean temperature = 30.827 degrees Celsius
w > MMM IT, w > MMM ST = sum of all positive Hotspot values over the preceding 12 weeks in the intertidal and subtidal

## Sheet: Logger temperature data
Date	Time	Date+Time	IT1	IT2	ITAvg	ST1	ST2	STAvg
2015-09-01	11:00:00	2015-09-01 11:00:00	27.284	26.965	27.1245
2015-09-01	11:15:00	2015-09-01 11:15:00	26.916	26.622	26.769
2015-09-01	11:30:00	2015-09-01 11:30:00	26.891	26.671	26.781
2015-09-01	11:45:00	2015-09-01 11:45:00	26.818	26.598	26.708
2015-09-01	12:00:00	2015-09-01 12:00:00	26.916	26.646	26.781
2015-09-01	12:15:00	2015-09-01 12:15:00	26.965	26.695	26.83
2015-09-01	12:30:00	2015-09-01 12:30:00	26.916	26.695	26.8055
2015-09-01	12:45:00	2015-09-01 12:45:00	26.5	26.28	26.39
2015-09-01	13:00:00	2015-09-01 13:00:00	26.353	26.109	26.231
2015-09-01	13:15:00	2015-09-01 13:15:00	26.353	26.134	26.2435
2015-09-01	13:30:00	2015-09-01 13:30:00	26.329	26.109	26.219
2015-09-01	13:45:00	2015-09-01 13:45:00	26.304	26.061	26.1825
2015-09-01	14:00:00	2015-09-01 14:00:00	26.28	26.061	26.1705
2015-09-01	14:15:00	2015-09-01 14:15:00	26.28	26.061	26.1705
2015-09-01	14:30:00	2015-09-01 14:30:00	26.304	26.085	26.1945
2015-09-01	14:45:00	2015-09-01 14:45:00	26.256	26.036	26.146
2015-09-01	15:00:00	2015-09-01 15:00:00	26.256	26.036	26.146
2015-09-01	15:15:00	2015-09-01 15:15:00	26.256	26.036	26.146
2015-09-01	15:30:00	2015-09-01 15:30:00	26.256	26.036	26.146
2015-09-01	15:45:00	2015-09-01 15:45:00	26.28	26.061	26.1705
2015-09-01	16:00:00	2015-09-01 16:00:00	26.28	26.061	26.1705
2015-09-01	16:15:00	2015-09-01 16:15:00	26.28	26.061	26.1705
2015-09-01	16:30:00	2015-09-01 16:30:00	26.28	26.061	26.1705
2015-09-01	16:45:00	2015-09-01 16:45:00	26.28	26.061	26.1705
2015-09-01	17:00:00	2015-09-01 17:00:00	26.28	26.036	26.158
2015-09-01	17:15:00	2015-09-01 17:15:00	26.256	26.036	26.146
2015-09-01	17:30:00	2015-09-01 17:30:00	26.256	26.036	26.146
2015-09-01	17:45:00	2015-09-01 17:45:00	26.256	26.036	26.146
2015-09-01	18:00:00	2015-09-01 18:00:00	26.28	26.061	26.1705
2015-09-01	18:15:00	2015-09-01 18:15:00	26.28	26.036	26.158
2015-09-01	18:30:00	2015-09-01 18:30:00	26.256	26.036	26.146
2015-09-01	18:45:00	2015-09-01 18:45:00	26.207	25.987	26.097
2015-09-01	19:00:00	2015-09-01 19:00:00	26.158	25.939	26.0485
2015-09-01	19:15:00	2015-09-01 19:15:00	25.987	25.768	25.8775
2015-09-01	19:30:00	2015-09-01 19:30:00	25.866	25.671	25.7685
2015-09-01	19:45:00	2015-09-01 19:45:00	25.574	25.428	25.501
2015-09-01	20:00:00	2015-09-01 20:00:00	23.737	25.065	24.401
2015-09-01	20:15:00	2015-09-01 20:15:00	22.92	24.653	23.7865
2015-09-01	20:30:00	2015-09-01 20:30:00	22.609	24.267	23.438
2015-09-01	20:45:00	2015-09-01 20:45:00	22.465	24.002	23.2335
2015-09-01	21:00:00	2015-09-01 21:00:00	22.298	23.713	23.0055
2015-09-01	21:15:00	2015-09-01 21:15:00	22.178	23.593	22.8855
2015-09-01	21:30:00	2015-09-01 21:30:00	22.082	23.448	22.765
2015-09-01	21:45:00	2015-09-01 21:45:00	21.939	23.328	22.6335
2015-09-01	22:00:00	2015-09-01 22:00:00	21.891	23.088	22.4895
2015-09-01	22:15:00	2015-09-01 22:15:00	21.867	22.92	22.3935
2015-09-01	22:30:00	2015-09-01 22:30:00	23.809	24.171	23.99
2015-09-01	22:45:00	2015-09-01 22:45:00	24.798	24.605	24.7015
2015-09-01	23:00:00	2015-09-01 23:00:00	24.992	24.774	24.883
2015-09-01	23:15:00	2015-09-01 23:15:00	24.557	24.315	24.436
2015-09-01	23:30:00	2015-09-01 23:30:00	25.647	25.55	25.5985
2015-09-01	23:45:00	2015-09-01 23:45:00	26.012	25.793	25.9025
2015-09-02	00:00:00	2015-09-02	25.89	25.671	25.7805
2015-09-02	00:15:00	2015-09-02 00:15:00	25.89	25.647	25.7685
2015-09-02	00:30:00	2015-09-02 00:30:00	25.841	25.623	25.732
2015-09-02	00:45:00	2015-09-02 00:45:00	25.817	25.598	25.7075
2015-09-02	01:00:00	2015-09-02 01:00:00	26.012	25.793	25.9025
2015-09-02	01:15:00	2015-09-02 01:15:00	26.158	25.939	26.0485
2015-09-02	01:30:00	2015-09-02 01:30:00	26.207	25.963	26.085
2015-09-02	01:45:00	2015-09-02 01:45:00	26.182	25.963	26.0725
2015-09-02	02:00:00	2015-09-02 02:00:00	26.182	25.963	26.0725
2015-09-02	02:15:00	2015-09-02 02:15:00	26.109	25.89	25.9995
2015-09-02	02:30:00	2015-09-02 02:30:00	26.158	25.939	26.0485
2015-09-02	02:45:00	2015-09-02 02:45:00	26.109	25.89	25.9995
2015-09-02	03:00:00	2015-09-02 03:00:00	26.134	25.914	26.024
2015-09-02	03:15:00	2015-09-02 03:15:00	26.134	25.914	26.024
2015-09-02	03:30:00	2015-09-02 03:30:00	26.207	25.987	26.097
2015-09-02	03:45:00	2015-09-02 03:45:00	26.231	26.012	26.1215
2015-09-02	04:00:00	2015-09-02 04:00:00	26.231	26.012	26.1215
2015-09-02	04:15:00	2015-09-02 04:15:00	26.207	25.987	26.097
2015-09-02	04:30:00	2015-09-02 04:30:00	26.182	25.963	26.0725
2015-09-02	04:45:00	2015-09-02 04:45:00	26.182	25.939	26.0605
2015-09-02	05:00:00	2015-09-02 05:00:00	26.158	25.939	26.0485
2015-09-02	05:15:00	2015-09-02 05:15:00	26.134	25.914	26.024
2015-09-02	05:30:00	2015-09-02 05:30:00	26.134	25.89	26.012
2015-09-02	05:45:00	2015-09-02 05:45:00	26.134	25.914	26.024
2015-09-02	06:00:00	2015-09-02 06:00:00	26.134	25.89	26.012
2015-09-02	06:15:00	2015-09-02 06:15:00	26.109	25.866	25.9875
2015-09-02	06:30:00	2015-09-02 06:30:00	26.085	25.866	25.9755
2015-09-02	06:45:00	2015-09-02 06:45:00	26.109	25.89	25.9995
2015-09-02	07:00:00	2015-09-02 07:00:00	26.109	25.89	25.9995
2015-09-02	07:15:00	2015-09-02 07:15:00	26.134	25.939	26.0365
2015-09-02	07:30:00	2015-09-02 07:30:00	26.109	25.939	26.024
2015-09-02	07:45:00	2015-09-02 07:45:00	26.134	26.036	26.085
2015-09-02	08:00:00	2015-09-02 08:00:00	26.256	26.182	26.219
2015-09-02	08:15:00	2015-09-02 08:15:00	24.798	23.978	24.388
2015-09-02	08:30:00	2015-09-02 08:30:00	23.737	25.38	24.5585
2015-09-02	08:45:00	2015-09-02 08:45:00	25.793	26.646	26.2195
2015-09-02	09:00:00	2015-09-02 09:00:00	27.087	26.818	26.9525
2015-09-02	09:15:00	2015-09-02 09:15:00	27.604	27.235	27.4195
2015-09-02	09:30:00	2015-09-02 09:30:00	27.998	27.628	27.813
2015-09-02	09:45:00	2015-09-02 09:45:00	28.444	28.097	28.2705
2015-09-02	10:00:00	2015-09-02 10:00:00	28.866	28.543	28.7045
2015-09-02	10:15:00	2015-09-02 10:15:00	29.24	29.065	29.1525
2015-09-02	10:30:00	2015-09-02 10:30:00	29.69	29.414	29.552
2015-09-02	10:45:00	2015-09-02 10:45:00	29.69	29.414	29.552
2015-09-02	11:00:00	2015-09-02 11:00:00	27.628	27.382	27.505	27.161		27.161
2015-09-02	11:15:00	2015-09-02 11:15:00	27.456	27.284	27.37	27.087		27.087
2015-09-02	11:30:00	2015-09-02 11:30:00	27.407	27.21	27.3085	27.014		27.014
2015-09-02	11:45:00	2015-09-02 11:45:00	27.161	26.965	27.063	26.94		26.94
2015-09-02	12:00:00	2015-09-02 12:00:00	26.94	26.744	26.842	26.818		26.818
2015-09-02	12:15:00	2015-09-02 12:15:00	26.965	26.744	26.8545	27.038		27.038
2015-09-02	12:30:00	2015-09-02 12:30:00	27.063	26.916	26.9895	26.842		26.842
2015-09-02	12:45:00	2015-09-02 12:45:00	27.063	26.842	26.9525	26.842		26.842
2015-09-02	13:00:00	2015-09-02 13:00:00	27.014	26.793	26.9035	26.842		26.842
2015-09-02	13:15:00	2015-09-02 13:15:00	26.989	26.72	26.8545	26.475		26.475
2015-09-02	13:30:00	2015-09-02 13:30:00	26.475	26.231	26.353	26.28		26.28
2015-09-02	13:45:00	2015-09-02 13:45:00	26.353	26.109	26.231	26.256		26.256
2015-09-02	14:00:00	2015-09-02 14:00:00	26.304	26.085	26.1945	26.207		26.207
2015-09-02	14:15:00	2015-09-02 14:15:00	26.28	26.061	26.1705	26.182		26.182
2015-09-02	14:30:00	2015-09-02 14:30:00	26.28	26.036	26.158	26.158		26.158
2015-09-02	14:45:00	2015-09-02 14:45:00	26.231	26.012	26.1215	26.134		26.134
2015-09-02	15:00:00	2015-09-02 15:00:00	26.231	25.987	26.109	26.134		26.134
2015-09-02	15:15:00	2015-09-02 15:15:00	26.231	26.012	26.1215	26.158		26.158
2015-09-02	15:30:00	2015-09-02 15:30:00	26.231	26.012	26.1215	26.158		26.158
2015-09-02	15:45:00	2015-09-02 15:45:00	26.231	26.012	26.1215	26.158		26.158
2015-09-02	16:00:00	2015-09-02 16:00:00	26.207	25.987	26.097	26.158		26.158
2015-09-02	16:15:00	2015-09-02 16:15:00	26.231	26.012	26.1215	26.134		26.134
2015-09-02	16:30:00	2015-09-02 16:30:00	26.256	26.036	26.146	26.182		26.182
2015-09-02	16:45:00	2015-09-02 16:45:00	26.304	26.085	26.1945	26.207		26.207
2015-09-02	17:00:00	2015-09-02 17:00:00	26.304	26.085	26.1945	26.182		26.182
2015-09-02	17:15:00	2015-09-02 17:15:00	26.256	26.036	26.146	26.158		26.158
2015-09-02	17:30:00	2015-09-02 17:30:00	26.231	26.012	26.1215	26.158		26.158
2015-09-02	17:45:00	2015-09-02 17:45:00	26.231	26.012	26.1215	26.158		26.158
2015-09-02	18:00:00	2015-09-02 18:00:00	26.231	25.987	26.109	26.158		26.158
2015-09-02	18:15:00	2015-09-02 18:15:00	26.207	25.987	26.097	26.134		26.134
2015-09-02	18:30:00	2015-09-02 18:30:00	26.256	26.012	26.134	26.158		26.158
2015-09-02	18:45:00	2015-09-02 18:45:00	26.28	26.061	26.1705	26.207		26.207
2015-09-02	19:00:00	2015-09-02 19:00:00	26.304	26.085	26.1945	26.256		26.256
2015-09-02	19:15:00	2015-09-02 19:15:00	26.28	26.061	26.1705	26.256		26.256
2015-09-02	19:30:00	2015-09-02 19:30:00	26.207	25.963	26.085	26.231		26.231
2015-09-02	19:45:00	2015-09-02 19:45:00	25.987	25.768	25.8775	26.182		26.182
2015-09-02	20:00:00	2015-09-02 20:00:00	25.939	25.72	25.8295	26.134		26.134
2015-09-02	20:15:00	2015-09-02 20:15:00	25.817	25.574	25.6955	25.866		25.866
2015-09-02	20:30:00	2015-09-02 20:30:00	25.647	25.404	25.5255	25.866		25.866
2015-09-02	20:45:00	2015-09-02 20:45:00	25.453	25.21	25.3315	25.671		25.671
2015-09-02	21:00:00	2015-09-02 21:00:00	25.283	24.992	25.1375	25.258		25.258
2015-09-02	21:15:00	2015-09-02 21:15:00	25.162	24.847	25.0045	24.653		24.653
2015-09-02	21:30:00	2015-09-02 21:30:00	24.944	24.605	24.7745	24.388		24.388
2015-09-02	21:45:00	2015-09-02 21:45:00	24.798	24.436	24.617	24.677		24.677
2015-09-02	22:00:00	2015-09-02 22:00:00	24.605	24.291	24.448	24.992		24.992
2015-09-02	22:15:00	2015-09-02 22:15:00	24.412	24.122	24.267	25.283		25.283
2015-09-02	22:30:00	2015-09-02 22:30:00	24.243	24.026	24.1345	25.453		25.453
2015-09-02	22:45:00	2015-09-02 22:45:00	24.098	23.833	23.9655	25.55		25.55
2015-09-02	23:00:00	2015-09-02 23:00:00	24.46	24.315	24.3875	25.598		25.598
2015-09-02	23:15:00	2015-09-02 23:15:00	25.307	25.113	25.21	25.55		25.55
2015-09-02	23:30:00	2015-09-02 23:30:00	25.137	24.919	25.028	25.065		25.065
2015-09-02	23:45:00	2015-09-02 23:45:00	25.089	24.895	24.992	24.871		24.871
2015-09-03	00:00:00	2015-09-03	25.817	25.623	25.72	25.04		25.04
2015-09-03	00:15:00	2015-09-03 00:15:00	25.914	25.695	25.8045	25.234		25.234
2015-09-03	00:30:00	2015-09-03 00:30:00	25.817	25.598	25.7075	25.744		25.744
2015-09-03	00:45:00	2015-09-03 00:45:00	25.793	25.55	25.6715	25.744		25.744
2015-09-03	01:00:00	2015-09-03 01:00:00	25.623	25.428	25.5255	25.477		25.477
2015-09-03	01:15:00	2015-09-03 01:15:00	25.768	25.55	25.659	25.355		25.355
2015-09-03	01:30:00	2015-09-03 01:30:00	25.866	25.695	25.7805	25.671		25.671
2015-09-03	01:45:00	2015-09-03 01:45:00	26.061	25.866	25.9635	26.036		26.036
2015-09-03	02:00:00	2015-09-03 02:00:00	26.158	25.939	26.0485	26.085		26.085
2015-09-03	02:15:00	2015-09-03 02:15:00	26.158	25.914	26.036	26.061		26.061
2015-09-03	02:30:00	2015-09-03 02:30:00	26.158	25.939	26.0485	26.085		26.085
2015-09-03	02:45:00	2015-09-03 02:45:00	26.109	25.89	25.9995	26.036		26.036
2015-09-03	03:00:00	2015-09-03 03:00:00	26.085	25.866	25.9755	26.012		26.012
2015-09-03	03:15:00	2015-09-03 03:15:00	26.085	25.89	25.9875	25.987		25.987
2015-09-03	03:30:00	2015-09-03 03:30:00	26.085	25.866	25.9755	26.012		26.012
2015-09-03	03:45:00	2015-09-03 03:45:00	26.109	25.914	26.0115	26.036		26.036
2015-09-03	04:00:00	2015-09-03 04:00:00	26.134	25.914	26.024	26.012		26.012
2015-09-03	04:15:00	2015-09-03 04:15:00	26.134	25.914	26.024	26.012		26.012
2015-09-03	04:30:00	2015-09-03 04:30:00	26.134	25.914	26.024	26.012		26.012
2015-09-03	04:45:00	2015-09-03 04:45:00	26.134	25.914	26.024	26.036		26.036
2015-09-03	05:00:00	2015-09-03 05:00:00	26.109	25.89	25.9995	26.061		26.061
2015-09-03	05:15:00	2015-09-03 05:15:00	26.109	25.866	25.9875	26.012		26.012
2015-09-03	05:30:00	2015-09-03 05:30:00	26.061	25.841	25.951	26.012		26.012
2015-09-03	05:45:00	2015-09-03 05:45:00	26.061	25.817	25.939	25.963		25.963
2015-09-03	06:00:00	2015-09-03 06:00:00	26.012	25.793	25.9025	25.939		25.939
2015-09-03	06:15:00	2015-09-03 06:15:00	26.012	25.793	25.9025	25.963		25.963
2015-09-03	06:30:00	2015-09-03 06:30:00	26.036	25.817	25.9265	25.963		25.963
2015-09-03	06:45:00	2015-09-03 06:45:00	26.012	25.793	25.9025	25.963		25.963
2015-09-03	07:00:00	2015-09-03 07:00:00	25.987	25.768	25.8775	25.963		25.963
2015-09-03	07:15:00	2015-09-03 07:15:00	26.012	25.768	25.89	25.963		25.963
2015-09-03	07:30:00	2015-09-03 07:30:00	26.036	25.793	25.9145	25.987		25.987
2015-09-03	07:45:00	2015-09-03 07:45:00	26.012	25.768	25.89	26.012		26.012
2015-09-03	08:00:00	2015-09-03 08:00:00	26.036	25.768	25.902	26.012		26.012
2015-09-03	08:15:00	2015-09-03 08:15:00	26.036	25.768	25.902	26.109		26.109
2015-09-03	08:30:00	2015-09-03 08:30:00	26.134	25.817	25.9755	26.158		26.158
2015-09-03	08:45:00	2015-09-03 08:45:00	26.28	25.987	26.1335	26.231		26.231
2015-09-03	09:00:00	2015-09-03 09:00:00	26.549	26.256	26.4025	26.475		26.475
2015-09-03	09:15:00	2015-09-03 09:15:00	26.867	26.524	26.6955	26.867		26.867
2015-09-03	09:30:00	2015-09-03 09:30:00	27.235	26.891	27.063	27.333		27.333
2015-09-03	09:45:00	2015-09-03 09:45:00	27.677	27.333	27.505	28.221		28.221
2015-09-03	10:00:00	2015-09-03 10:00:00	28.245	27.924	28.0845	28.419		28.419
2015-09-03	10:15:00	2015-09-03 10:15:00	28.916	28.568	28.742	28.221		28.221
2015-09-03	10:30:00	2015-09-03 10:30:00	29.49	29.215	29.3525	27.974		27.974
2015-09-03	10:45:00	2015-09-03 10:45:00	30.091	29.815	29.953	27.702		27.702
2015-09-03	11:00:00	2015-09-03 11:00:00	30.722	30.52	30.621	27.554		27.554
2015-09-03	11:15:00	2015-09-03 11:15:00	31.23	31.001	31.1155	27.407		27.407
2015-09-03	11:30:00	2015-09-03 11:30:00	29.165	28.965	29.065	27.308		27.308
2015-09-03	11:45:00	2015-09-03 11:45:00	27.653	27.579	27.616	27.235		27.235
2015-09-03	12:00:00	2015-09-03 12:00:00	27.653	27.481	27.567	27.112		27.112
2015-09-03	12:15:00	2015-09-03 12:15:00	27.53	27.333	27.4315	26.867		26.867
2015-09-03	12:30:00	2015-09-03 12:30:00	27.186	26.965	27.0755	26.818		26.818
2015-09-03	12:45:00	2015-09-03 12:45:00	26.989	26.793	26.891	26.744		26.744
2015-09-03	13:00:00	2015-09-03 13:00:00	27.038	26.842	26.94	26.72		26.72
2015-09-03	13:15:00	2015-09-03 13:15:00	27.161	27.014	27.0875	26.72		26.72
2015-09-03	13:30:00	2015-09-03 13:30:00	27.136	26.989	27.0625	26.744		26.744
2015-09-03	13:45:00	2015-09-03 13:45:00	27.136	26.94	27.038	26.793		26.793
2015-09-03	14:00:00	2015-09-03 14:00:00	26.965	26.671	26.818	26.353		26.353
2015-09-03	14:15:00	2015-09-03 14:15:00	26.402	26.134	26.268	26.207		26.207
2015-09-03	14:30:00	2015-09-03 14:30:00	26.256	26.036	26.146	26.182		26.182
2015-09-03	14:45:00	2015-09-03 14:45:00	26.207	25.987	26.097	26.109		26.109
2015-09-03	15:00:00	2015-09-03 15:00:00	26.182	25.963	26.0725	26.109		26.109
2015-09-03	15:15:00	2015-09-03 15:15:00	26.182	25.963	26.0725	26.085		26.085
2015-09-03	15:30:00	2015-09-03 15:30:00	26.158	25.939	26.0485	26.085		26.085
2015-09-03	15:45:00	2015-09-03 15:45:00	26.158	25.939	26.0485	26.085		26.085
2015-09-03	16:00:00	2015-09-03 16:00:00	26.158	25.939	26.0485	26.085		26.085
2015-09-03	16:15:00	2015-09-03 16:15:00	26.158	25.939	26.0485	26.085		26.085
2015-09-03	16:30:00	2015-09-03 16:30:00	26.158	25.939	26.0485	26.085		26.085
2015-09-03	16:45:00	2015-09-03 16:45:00	26.158	25.939	26.0485	26.085		26.085
2015-09-03	17:00:00	2015-09-03 17:00:00	26.158	25.939	26.0485	26.085		26.085
2015-09-03	17:15:00	2015-09-03 17:15:00	26.158	25.939	26.0485	26.085		26.085
2015-09-03	17:30:00	2015-09-03 17:30:00	26.182	25.963	26.0725	26.085		26.085
2015-09-03	17:45:00	2015-09-03 17:45:00	26.182	25.963	26.0725	26.109		26.109
2015-09-03	18:00:00	2015-09-03 18:00:00	26.182	25.963	26.0725	26.109		26.109
2015-09-03	18:15:00	2015-09-03 18:15:00	26.182	25.963	26.0725	26.109		26.109
2015-09-03	18:30:00	2015-09-03 18:30:00	26.182	25.963	26.0725	26.109		26.109
2015-09-03	18:45:00	2015-09-03 18:45:00	26.182	25.963	26.0725	26.109		26.109
2015-09-03	19:00:00	2015-09-03 19:00:00	26.207	25.963	26.085	26.134		26.134
2015-09-03	19:15:00	2015-09-03 19:15:00	26.182	25.963	26.0725	26.134		26.134
2015-09-03	19:30:00	2015-09-03 19:30:00	26.182	25.963	26.0725	26.134		26.134
2015-09-03	19:45:00	2015-09-03 19:45:00	26.158	25.939	26.0485	26.109		26.109
2015-09-03	20:00:00	2015-09-03 20:00:00	26.109	25.89	25.9995	26.085		26.085
2015-09-03	20:15:00	2015-09-03 20:15:00	26.012	25.793	25.9025	26.061		26.061
2015-09-03	20:30:00	2015-09-03 20:30:00	25.963	25.72	25.8415	26.012		26.012
2015-09-03	20:45:00	2015-09-03 20:45:00	25.841	25.598	25.7195	25.963		25.963
2015-09-03	21:00:00	2015-09-03 21:00:00	25.695	25.428	25.5615	25.914		25.914
2015-09-03	21:15:00	2015-09-03 21:15:00	25.574	25.307	25.4405	25.866		25.866
2015-09-03	21:30:00	2015-09-03 21:30:00	25.404	25.137	25.2705	25.768		25.768
2015-09-03	21:45:00	2015-09-03 21:45:00	25.234	24.968	25.101	25.598		25.598
2015-09-03	22:00:00	2015-09-03 22:00:00	25.113	24.823	24.968	25.501		25.501
2015-09-03	22:15:00	2015-09-03 22:15:00	24.944	24.629	24.7865	25.38		25.38
2015-09-03	22:30:00	2015-09-03 22:30:00	24.677	24.412	24.5445	25.307		25.307
2015-09-03	22:45:00	2015-09-03 22:45:00	24.46	24.146	24.303	25.428		25.428
2015-09-03	23:00:00	2015-09-03 23:00:00	24.219	23.93	24.0745	25.598		25.598
2015-09-03	23:15:00	2015-09-03 23:15:00	24.026	23.737	23.8815	25.72		25.72
2015-09-03	23:30:00	2015-09-03 23:30:00	24.532	24.339	24.4355	25.768		25.768
2015-09-03	23:45:00	2015-09-03 23:45:00	25.331	25.137	25.234	25.841		25.841
2015-09-04	00:00:00	2015-09-04	25.331	25.162	25.2465	25.866		25.866
2015-09-04	00:15:00	2015-09-04 00:15:00	25.089	24.895	24.992	25.817		25.817
2015-09-04	00:30:00	2015-09-04 00:30:00	25.72	25.501	25.6105	25.162		25.162
2015-09-04	00:45:00	2015-09-04 00:45:00	25.817	25.598	25.7075	25.162		25.162
2015-09-04	01:00:00	2015-09-04 01:00:00	25.744	25.525	25.6345	24.992		24.992
2015-09-04	01:15:00	2015-09-04 01:15:00	25.793	25.574	25.6835	25.089		25.089
2015-09-04	01:30:00	2015-09-04 01:30:00	25.744	25.525	25.6345	25.574		25.574
2015-09-04	01:45:00	2015-09-04 01:45:00	25.598	25.355	25.4765	25.623		25.623
2015-09-04	02:00:00	2015-09-04 02:00:00	25.695	25.501	25.598	25.55		25.55
2015-09-04	02:15:00	2015-09-04 02:15:00	26.036	25.841	25.9385	25.963		25.963
2015-09-04	02:30:00	2015-09-04 02:30:00	26.085	25.866	25.9755	26.012		26.012
2015-09-04	02:45:00	2015-09-04 02:45:00	26.109	25.89	25.9995	26.036		26.036
2015-09-04	03:00:00	2015-09-04 03:00:00	26.085	25.841	25.963	25.987		25.987
2015-09-04	03:15:00	2015-09-04 03:15:00	26.036	25.817	25.9265	25.963		25.963
2015-09-04	03:30:00	2015-09-04 03:30:00	26.036	25.817	25.9265	25.987		25.987
2015-09-04	03:45:00	2015-09-04 03:45:00	26.085	25.866	25.9755	26.012		26.012
2015-09-04	04:00:00	2015-09-04 04:00:00	26.085	25.866	25.9755	26.012		26.012
2015-09-04	04:15:00	2015-09-04 04:15:00	26.085	25.841	25.963	26.012		26.012
2015-09-04	04:30:00	2015-09-04 04:30:00	26.061	25.841	25.951	25.987		25.987
2015-09-04	04:45:00	2015-09-04 04:45:00	26.061	25.817	25.939	25.987		25.987
2015-09-04	05:00:00	2015-09-04 05:00:00	26.061	25.841	25.951	25.987		25.987
2015-09-04	05:15:00	2015-09-04 05:15:00	26.036	25.817	25.9265	25.963		25.963
2015-09-04	05:30:00	2015-09-04 05:30:00	26.036	25.817	25.9265	25.987		25.987
2015-09-04	05:45:00	2015-09-04 05:45:00	26.036	25.817	25.9265	25.963		25.963
2015-09-04	06:00:00	2015-09-04 06:00:00	26.036	25.817	25.9265	25.963		25.963
2015-09-04	06:15:00	2015-09-04 06:15:00	26.036	25.817	25.9265	25.963		25.963
2015-09-04	06:30:00	2015-09-04 06:30:00	26.036	25.817	25.9265	25.963		25.963
2015-09-04	06:45:00	2015-09-04 06:45:00	26.012	25.793	25.9025	25.963		25.963
2015-09-04	07:00:00	2015-09-04 07:00:00	26.012	25.793	25.9025	25.939		25.939
2015-09-04	07:15:00	2015-09-04 07:15:00	25.987	25.768	25.8775	25.939		25.939
2015-09-04	07:30:00	2015-09-04 07:30:00	26.012	25.793	25.9025	25.963		25.963
2015-09-04	07:45:00	2015-09-04 07:45:00	26.036	25.817	25.9265	25.987		25.987
2015-09-04	08:00:00	2015-09-04 08:00:00	26.061	25.841	25.951	26.036		26.036
2015-09-04	08:15:00	2015-09-04 08:15:00	26.109	25.866	25.9875	26.061		26.061
2015-09-04	08:30:00	2015-09-04 08:30:00	26.182	25.914	26.048	26.109		26.109
2015-09-04	08:45:00	2015-09-04 08:45:00	26.256	25.987	26.1215	26.158		26.158
2015-09-04	09:00:00	2015-09-04 09:00:00	26.353	26.061	26.207	26.256		26.256
2015-09-04	09:15:00	2015-09-04 09:15:00	26.573	26.28	26.4265	26.353		26.353
2015-09-04	09:30:00	2015-09-04 09:30:00	26.916	26.646	26.781	26.5		26.5
2015-09-04	09:45:00	2015-09-04 09:45:00	27.407	27.087	27.247	26.769		26.769
2015-09-04	10:00:00	2015-09-04 10:00:00	27.875	27.53	27.7025	27.112		27.112
2015-09-04	10:15:00	2015-09-04 10:15:00	28.345	28.023	28.184	27.53		27.53
2015-09-04	10:30:00	2015-09-04 10:30:00	28.891	28.593	28.742	27.85		27.85
2015-09-04	10:45:00	2015-09-04 10:45:00	29.389	29.09	29.2395	27.505		27.505
2015-09-04	11:00:00	2015-09-04 11:00:00	29.765	29.565	29.665	27.481		27.481
2015-09-04	11:15:00	2015-09-04 11:15:00	30.117	29.916	30.0165	27.481		27.481
2015-09-04	11:30:00	2015-09-04 11:30:00	30.394	30.243	30.3185	27.358		27.358
2015-09-04	11:45:00	2015-09-04 11:45:00	30.824	30.596	30.71	27.358		27.358
2015-09-04	12:00:00	2015-09-04 12:00:00	29.115	28.916	29.0155	27.186		27.186
2015-09-04	12:15:00	2015-09-04 12:15:00	27.974	27.875	27.9245	27.087		27.087
2015-09-04	12:30:00	2015-09-04 12:30:00	27.85	27.801	27.8255	26.965		26.965
2015-09-04	12:45:00	2015-09-04 12:45:00	27.727	27.53	27.6285	26.891		26.891
2015-09-04	13:00:00	2015-09-04 13:00:00	27.358	27.161	27.2595	26.793		26.793
2015-09-04	13:15:00	2015-09-04 13:15:00	27.161	26.94	27.0505	26.72		26.72
2015-09-04	13:30:00	2015-09-04 13:30:00	27.038	26.842	26.94	26.671		26.671
2015-09-04	13:45:00	2015-09-04 13:45:00	26.965	26.769	26.867	26.646		26.646
2015-09-04	14:00:00	2015-09-04 14:00:00	27.014	26.818	26.916	26.549		26.549
2015-09-04	14:15:00	2015-09-04 14:15:00	27.038	26.793	26.9155	26.475		26.475
2015-09-04	14:30:00	2015-09-04 14:30:00	26.842	26.549	26.6955	26.426		26.426
2015-09-04	14:45:00	2015-09-04 14:45:00	26.5	26.256	26.378	26.329		26.329
2015-09-04	15:00:00	2015-09-04 15:00:00	26.402	26.158	26.28	26.207		26.207
2015-09-04	15:15:00	2015-09-04 15:15:00	26.28	26.036	26.158	26.182		26.182
2015-09-04	15:30:00	2015-09-04 15:30:00	26.231	25.987	26.109	26.109		26.109
2015-09-04	15:45:00	2015-09-04 15:45:00	26.158	25.939	26.0485	26.085		26.085
2015-09-04	16:00:00	2015-09-04 16:00:00	26.158	25.939	26.0485	26.085		26.085
2015-09-04	16:15:00	2015-09-04 16:15:00	26.158	25.939	26.0485	26.061		26.061
2015-09-04	16:30:00	2015-09-04 16:30:00	26.158	25.914	26.036	26.061		26.061
2015-09-04	16:45:00	2015-09-04 16:45:00	26.134	25.914	26.024	26.061		26.061
2015-09-04	17:00:00	2015-09-04 17:00:00	26.134	25.914	26.024	26.061		26.061
2015-09-04	17:15:00	2015-09-04 17:15:00	26.134	25.914	26.024	26.061		26.061
2015-09-04	17:30:00	2015-09-04 17:30:00	26.158	25.939	26.0485	26.085		26.085
2015-09-04	17:45:00	2015-09-04 17:45:00	26.158	25.939	26.0485	26.085		26.085
2015-09-04	18:00:00	2015-09-04 18:00:00	26.158	25.939	26.0485	26.085		26.085
2015-09-04	18:15:00	2015-09-04 18:15:00	26.158	25.939	26.0485	26.085		26.085
2015-09-04	18:30:00	2015-09-04 18:30:00	26.158	25.939	26.0485	26.085		26.085
2015-09-04	18:45:00	2015-09-04 18:45:00	26.158	25.939	26.0485	26.085		26.085
2015-09-04	19:00:00	2015-09-04 19:00:00	26.158	25.939	26.0485	26.109		26.109
2015-09-04	19:15:00	2015-09-04 19:15:00	26.182	25.963	26.0725	26.109		26.109
2015-09-04	19:30:00	2015-09-04 19:30:00	26.182	25.963	26.0725	26.109		26.109
2015-09-04	19:45:00	2015-09-04 19:45:00	26.182	25.963	26.0725	26.109		26.109
2015-09-04	20:00:00	2015-09-04 20:00:00	26.182	25.963	26.0725	26.134		26.134
2015-09-04	20:15:00	2015-09-04 20:15:00	26.182	25.963	26.0725	26.109		26.109
2015-09-04	20:30:00	2015-09-04 20:30:00	26.158	25.939	26.0485	26.109		26.109
2015-09-04	20:45:00	2015-09-04 20:45:00	26.085	25.866	25.9755	26.085		26.085
2015-09-04	21:00:00	2015-09-04 21:00:00	25.963	25.72	25.8415	26.061		26.061
2015-09-04	21:15:00	2015-09-04 21:15:00	25.939	25.72	25.8295	26.036		26.036
2015-09-04	21:30:00	2015-09-04 21:30:00	25.866	25.671	25.7685	26.012		26.012
2015-09-04	21:45:00	2015-09-04 21:45:00	25.744	25.501	25.6225	25.914		25.914
2015-09-04	22:00:00	2015-09-04 22:00:00	25.598	25.355	25.4765	25.89		25.89
2015-09-04	22:15:00	2015-09-04 22:15:00	25.501	25.234	25.3675	25.817		25.817
2015-09-04	22:30:00	2015-09-04 22:30:00	25.38	25.113	25.2465	25.793		25.793
2015-09-04	22:45:00	2015-09-04 22:45:00	25.283	25.04	25.1615	25.744		25.744
2015-09-04	23:00:00	2015-09-04 23:00:00	25.21	24.919	25.0645	25.72		25.72
2015-09-04	23:15:00	2015-09-04 23:15:00	25.113	24.798	24.9555	25.695		25.695
2015-09-04	23:30:00	2015-09-04 23:30:00	24.968	24.677	24.8225	25.671		25.671
2015-09-04	23:45:00	2015-09-04 23:45:00	25.089	24.847	24.968	25.623		25.623
2015-09-05	00:00:00	2015-09-05	25.258	25.04	25.149	25.598		25.598
2015-09-05	00:15:00	2015-09-05 00:15:00	25.307	25.065	25.186	25.355		25.355
2015-09-05	00:30:00	2015-09-05 00:30:00	24.992	24.726	24.859	25.21		25.21
2015-09-05	00:45:00	2015-09-05 00:45:00	25.234	25.04	25.137	25.331		25.331
2015-09-05	01:00:00	2015-09-05 01:00:00	25.817	25.623	25.72	25.38		25.38
2015-09-05	01:15:00	2015-09-05 01:15:00	25.939	25.72	25.8295	25.38		25.38
2015-09-05	01:30:00	2015-09-05 01:30:00	25.841	25.598	25.7195	25.477		25.477
2015-09-05	01:45:00	2015-09-05 01:45:00	25.841	25.623	25.732	25.768		25.768
2015-09-05	02:00:00	2015-09-05 02:00:00	25.793	25.574	25.6835	25.72		25.72
2015-09-05	02:15:00	2015-09-05 02:15:00	25.768	25.525	25.6465	25.793		25.793
2015-09-05	02:30:00	2015-09-05 02:30:00	25.72	25.501	25.6105	25.768		25.768
2015-09-05	02:45:00	2015-09-05 02:45:00	25.89	25.671	25.7805	25.89		25.89
2015-09-05	03:00:00	2015-09-05 03:00:00	26.036	25.817	25.9265	25.939		25.939
2015-09-05	03:15:00	2015-09-05 03:15:00	26.085	25.866	25.9755	26.012		26.012
2015-09-05	03:30:00	2015-09-05 03:30:00	26.109	25.89	25.9995	26.036		26.036
2015-09-05	03:45:00	2015-09-05 03:45:00	26.061	25.841	25.951	25.987		25.987
2015-09-05	04:00:00	2015-09-05 04:00:00	26.061	25.841	25.951	25.987		25.987
2015-09-05	04:15:00	2015-09-05 04:15:00	26.061	25.841	25.951	25.987		25.987
2015-09-05	04:30:00	2015-09-05 04:30:00	26.061	25.817	25.939	25.987		25.987
2015-09-05	04:45:00	2015-09-05 04:45:00	26.061	25.841	25.951	26.012		26.012
2015-09-05	05:00:00	2015-09-05 05:00:00	26.085	25.866	25.9755	26.012		26.012
2015-09-05	05:15:00	2015-09-05 05:15:00	26.085	25.866	25.9755	26.012		26.012
2015-09-05	05:30:00	2015-09-05 05:30:00	26.085	25.866	25.9755	26.012		26.012
2015-09-05	05:45:00	2015-09-05 05:45:00	26.085	25.841	25.963	26.012		26.012
2015-09-05	06:00:00	2015-09-05 06:00:00	26.061	25.841	25.951	26.012		26.012
2015-09-05	06:15:00	2015-09-05 06:15:00	26.061	25.841	25.951	25.987		25.987
2015-09-05	06:30:00	2015-09-05 06:30:00	26.061	25.841	25.951	25.987		25.987
2015-09-05	06:45:00	2015-09-05 06:45:00	26.061	25.817	25.939	25.987		25.987
2015-09-05	07:00:00	2015-09-05 07:00:00	26.036	25.817	25.9265	25.963		25.963
2015-09-05	07:15:00	2015-09-05 07:15:00	26.036	25.817	25.9265	25.963		25.963
2015-09-05	07:30:00	2015-09-05 07:30:00	26.036	25.817	25.9265	25.963		25.963
2015-09-05	07:45:00	2015-09-05 07:45:00	26.036	25.817	25.9265	25.987		25.987
2015-09-05	08:00:00	2015-09-05 08:00:00	26.036	25.817	25.9265	25.987		25.987
2015-09-05	08:15:00	2015-09-05 08:15:00	26.061	25.841	25.951	26.012		26.012
2015-09-05	08:30:00	2015-09-05 08:30:00	26.109	25.89	25.9995	26.061		26.061
2015-09-05	08:45:00	2015-09-05 08:45:00	26.207	25.914	26.0605	26.134		26.134
2015-09-05	09:00:00	2015-09-05 09:00:00	26.231	25.987	26.109	26.182		26.182
2015-09-05	09:15:00	2015-09-05 09:15:00	26.378	26.109	26.2435	26.231		26.231
2015-09-05	09:30:00	2015-09-05 09:30:00	26.524	26.231	26.3775	26.378		26.378
2015-09-05	09:45:00	2015-09-05 09:45:00	26.695	26.378	26.5365	26.5		26.5
2015-09-05	10:00:00	2015-09-05 10:00:00	27.087	26.793	26.94	26.622		26.622
2015-09-05	10:15:00	2015-09-05 10:15:00	27.505	27.21	27.3575	26.72		26.72
2015-09-05	10:30:00	2015-09-05 10:30:00	28.072	27.85	27.961	26.94		26.94
2015-09-05	10:45:00	2015-09-05 10:45:00	28.617	28.394	28.5055	27.112		27.112
2015-09-05	11:00:00	2015-09-05 11:00:00	29.19	28.941	29.0655	27.382		27.382
2015-09-05	11:15:00	2015-09-05 11:15:00	29.665	29.464	29.5645	27.604		27.604
2015-09-05	11:30:00	2015-09-05 11:30:00	30.167	29.815	29.991	27.776		27.776
2015-09-05	11:45:00	2015-09-05 11:45:00	30.824	30.217	30.5205	27.727		27.727
2015-09-05	12:00:00	2015-09-05 12:00:00	30.798	30.469	30.6335	27.677		27.677
2015-09-05	12:15:00	2015-09-05 12:15:00	30.318	30.142	30.23	27.727		27.727
2015-09-05	12:30:00	2015-09-05 12:30:00	29.015	28.841	28.928	27.53		27.53
2015-09-05	12:45:00	2015-09-05 12:45:00	28.468	28.245	28.3565	27.456		27.456
2015-09-05	13:00:00	2015-09-05 13:00:00	28.245	28.048	28.1465	27.333		27.333
2015-09-05	13:15:00	2015-09-05 13:15:00	28.147	27.924	28.0355	27.038		27.038
2015-09-05	13:30:00	2015-09-05 13:30:00	27.949	27.727	27.838	27.014		27.014
2015-09-05	13:45:00	2015-09-05 13:45:00	27.431	27.21	27.3205	26.965		26.965
2015-09-05	14:00:00	2015-09-05 14:00:00	27.161	26.94	27.0505	26.744		26.744
2015-09-05	14:15:00	2015-09-05 14:15:00	27.161	26.94	27.0505	26.646		26.646
2015-09-05	14:30:00	2015-09-05 14:30:00	27.186	26.965	27.0755	26.549		26.549
2015-09-05	14:45:00	2015-09-05 14:45:00	27.186	27.014	27.1	26.524		26.524
2015-09-05	15:00:00	2015-09-05 15:00:00	27.21	26.965	27.0875	26.451		26.451
2015-09-05	15:15:00	2015-09-05 15:15:00	26.793	26.549	26.671	26.353		26.353
2015-09-05	15:30:00	2015-09-05 15:30:00	26.573	26.304	26.4385	26.304		26.304
2015-09-05	15:45:00	2015-09-05 15:45:00	26.426	26.207	26.3165	26.28		26.28
2015-09-05	16:00:00	2015-09-05 16:00:00	26.378	26.134	26.256	26.256		26.256
2015-09-05	16:15:00	2015-09-05 16:15:00	26.353	26.109	26.231	26.207		26.207
2015-09-05	16:30:00	2015-09-05 16:30:00	26.28	26.036	26.158	26.182		26.182
2015-09-05	16:45:00	2015-09-05 16:45:00	26.256	26.036	26.146	26.182		26.182
2015-09-05	17:00:00	2015-09-05 17:00:00	26.231	26.012	26.1215	26.158		26.158
2015-09-05	17:15:00	2015-09-05 17:15:00	26.231	26.012	26.1215	26.134		26.134
2015-09-05	17:30:00	2015-09-05 17:30:00	26.207	25.987	26.097	26.134		26.134
2015-09-05	17:45:00	2015-09-05 17:45:00	26.207	25.963	26.085	26.109		26.109
2015-09-05	18:00:00	2015-09-05 18:00:00	26.182	25.963	26.0725	26.085		26.085
2015-09-05	18:15:00	2015-09-05 18:15:00	26.158	25.939	26.0485	26.085		26.085
2015-09-05	18:30:00	2015-09-05 18:30:00	26.158	25.939	26.0485	26.085		26.085
2015-09-05	18:45:00	2015-09-05 18:45:00	26.158	25.939	26.0485	26.085		26.085
2015-09-05	19:00:00	2015-09-05 19:00:00	26.158	25.939	26.0485	26.085		26.085
2015-09-05	19:15:00	2015-09-05 19:15:00	26.182	25.963	26.0725	26.109		26.109
2015-09-05	19:30:00	2015-09-05 19:30:00	26.182	25.963	26.0725	26.109		26.109
2015-09-05	19:45:00	2015-09-05 19:45:00	26.182	25.963	26.0725	26.109		26.109
2015-09-05	20:00:00	2015-09-05 20:00:00	26.207	25.963	26.085	26.134		26.134
2015-09-05	20:15:00	2015-09-05 20:15:00	26.207	25.987	26.097	26.158		26.158
2015-09-05	20:30:00	2015-09-05 20:30:00	26.231	26.012	26.1215	26.158		26.158
2015-09-05	20:45:00	2015-09-05 20:45:00	26.231	26.012	26.1215	26.158		26.158
2015-09-05	21:00:00	2015-09-05 21:00:00	26.207	25.987	26.097	26.158		26.158
2015-09-05	21:15:00	2015-09-05 21:15:00	26.182	25.963	26.0725	26.134		26.134
2015-09-05	21:30:00	2015-09-05 21:30:00	26.134	25.914	26.024	26.134		26.134
2015-09-05	21:45:00	2015-09-05 21:45:00	26.061	25.841	25.951	26.109		26.109
2015-09-05	22:00:00	2015-09-05 22:00:00	26.012	25.793	25.9025	26.085		26.085
2015-09-05	22:15:00	2015-09-05 22:15:00	25.963	25.72	25.8415	26.036		26.036
2015-09-05	22:30:00	2015-09-05 22:30:00	25.866	25.647	25.7565	26.012		26.012
2015-09-05	22:45:00	2015-09-05 22:45:00	25.768	25.525	25.6465	25.987		25.987
2015-09-05	23:00:00	2015-09-05 23:00:00	25.623	25.38	25.5015	25.963		25.963
2015-09-05	23:15:00	2015-09-05 23:15:00	25.453	25.234	25.3435	25.914		25.914
2015-09-05	23:30:00	2015-09-05 23:30:00	25.428	25.162	25.295	25.914		25.914
2015-09-05	23:45:00	2015-09-05 23:45:00	25.355	25.137	25.246	25.914		25.914
2015-09-06	00:00:00	2015-09-06	25.404	25.186	25.295	25.914		25.914
2015-09-06	00:15:00	2015-09-06 00:15:00	25.428	25.21	25.319	25.89		25.89
2015-09-06	00:30:00	2015-09-06 00:30:00	25.525	25.307	25.416	25.817		25.817
2015-09-06	00:45:00	2015-09-06 00:45:00	25.186	24.992	25.089	25.671		25.671
2015-09-06	01:00:00	2015-09-06 01:00:00	25.016	24.798	24.907	25.598		25.598
2015-09-06	01:15:00	2015-09-06 01:15:00	25.38	25.234	25.307	25.574		25.574
2015-09-06	01:30:00	2015-09-06 01:30:00	26.036	25.841	25.9385	25.574		25.574
2015-09-06	01:45:00	2015-09-06 01:45:00	26.061	25.841	25.951	25.55		25.55
2015-09-06	02:00:00	2015-09-06 02:00:00	25.914	25.671	25.7925	25.525		25.525
2015-09-06	02:15:00	2015-09-06 02:15:00	25.89	25.671	25.7805	25.671		25.671
2015-09-06	02:30:00	2015-09-06 02:30:00	25.914	25.695	25.8045	25.768		25.768
2015-09-06	02:45:00	2015-09-06 02:45:00	25.89	25.671	25.7805	25.793		25.793
2015-09-06	03:00:00	2015-09-06 03:00:00	25.866	25.647	25.7565	25.647		25.647
2015-09-06	03:15:00	2015-09-06 03:15:00	25.841	25.647	25.744	25.525		25.525
2015-09-06	03:30:00	2015-09-06 03:30:00	25.987	25.841	25.914	25.793		25.793
2015-09-06	03:45:00	2015-09-06 03:45:00	25.987	25.768	25.8775	25.914		25.914
2015-09-06	04:00:00	2015-09-06 04:00:00	26.109	25.89	25.9995	25.963		25.963
2015-09-06	04:15:00	2015-09-06 04:15:00	26.134	25.914	26.024	26.061		26.061
2015-09-06	04:30:00	2015-09-06 04:30:00	26.134	25.914	26.024	26.012		26.012
2015-09-06	04:45:00	2015-09-06 04:45:00	26.061	25.841	25.951	25.987		25.987
2015-09-06	05:00:00	2015-09-06 05:00:00	26.061	25.841	25.951	25.987		25.987
2015-09-06	05:15:00	2015-09-06 05:15:00	26.061	25.841	25.951	25.987		25.987
2015-09-06	05:30:00	2015-09-06 05:30:00	26.061	25.841	25.951	25.987		25.987
2015-09-06	05:45:00	2015-09-06 05:45:00	26.061	25.841	25.951	25.987		25.987
2015-09-06	06:00:00	2015-09-06 06:00:00	26.061	25.817	25.939	25.987		25.987
2015-09-06	06:15:00	2015-09-06 06:15:00	26.061	25.817	25.939	25.963		25.963
2015-09-06	06:30:00	2015-09-06 06:30:00	26.061	25.841	25.951	25.987		25.987
2015-09-06	06:45:00	2015-09-06 06:45:00	26.061	25.841	25.951	25.987		25.987
2015-09-06	07:00:00	2015-09-06 07:00:00	26.061	25.841	25.951	26.012		26.012
2015-09-06	07:15:00	2015-09-06 07:15:00	26.061	25.841	25.951	26.012		26.012
2015-09-06	07:30:00	2015-09-06 07:30:00	26.085	25.841	25.963	26.012		26.012
2015-09-06	07:45:00	2015-09-06 07:45:00	26.085	25.866	25.9755	26.036		26.036
2015-09-06	08:00:00	2015-09-06 08:00:00	26.109	25.89	25.9995	26.061		26.061
2015-09-06	08:15:00	2015-09-06 08:15:00	26.134	25.914	26.024	26.061		26.061
2015-09-06	08:30:00	2015-09-06 08:30:00	26.134	25.914	26.024	26.085		26.085
2015-09-06	08:45:00	2015-09-06 08:45:00	26.158	25.939	26.0485	26.109		26.109
2015-09-06	09:00:00	2015-09-06 09:00:00	26.182	25.963	26.0725	26.158		26.158
2015-09-06	09:15:00	2015-09-06 09:15:00	26.256	26.036	26.146	26.207		26.207
2015-09-06	09:30:00	2015-09-06 09:30:00	26.329	26.085	26.207	26.329		26.329
2015-09-06	09:45:00	2015-09-06 09:45:00	26.426	26.182	26.304	26.378		26.378
2015-09-06	10:00:00	2015-09-06 10:00:00	26.598	26.353	26.4755	26.5		26.5
2015-09-06	10:15:00	2015-09-06 10:15:00	26.769	26.573	26.671	26.573		26.573
2015-09-06	10:30:00	2015-09-06 10:30:00	26.965	26.72	26.8425	26.671		26.671
2015-09-06	10:45:00	2015-09-06 10:45:00	27.235	27.014	27.1245	26.72		26.72
2015-09-06	11:00:00	2015-09-06 11:00:00	27.751	27.53	27.6405	26.842		26.842
2015-09-06	11:15:00	2015-09-06 11:15:00	28.295	28.27	28.2825	26.94		26.94
2015-09-06	11:30:00	2015-09-06 11:30:00	28.941	29.015	28.978	27.112		27.112
2015-09-06	11:45:00	2015-09-06 11:45:00	29.615	29.464	29.5395	27.284		27.284
2015-09-06	12:00:00	2015-09-06 12:00:00	30.016	29.715	29.8655	27.407		27.407
2015-09-06	12:15:00	2015-09-06 12:15:00	30.091	30.016	30.0535	27.431		27.431
2015-09-06	12:30:00	2015-09-06 12:30:00	30.066	30.066	30.066	27.456		27.456
2015-09-06	12:45:00	2015-09-06 12:45:00	29.715	29.315	29.515	27.505		27.505
2015-09-06	13:00:00	2015-09-06 13:00:00	29.765	29.414	29.5895	27.677		27.677
2015-09-06	13:15:00	2015-09-06 13:15:00	29.74	29.389	29.5645	27.825		27.825
2015-09-06	13:30:00	2015-09-06 13:30:00	28.99	28.593	28.7915	27.801		27.801
2015-09-06	13:45:00	2015-09-06 13:45:00	28.766	28.419	28.5925	27.85		27.85
2015-09-06	14:00:00	2015-09-06 14:00:00	28.468	28.122	28.295	27.825		27.825
2015-09-06	14:15:00	2015-09-06 14:15:00	27.776	27.456	27.616	27.776		27.776
2015-09-06	14:30:00	2015-09-06 14:30:00	27.677	27.358	27.5175	27.53		27.53
2015-09-06	14:45:00	2015-09-06 14:45:00	27.604	27.358	27.481	27.284		27.284
2015-09-06	15:00:00	2015-09-06 15:00:00	27.628	27.358	27.493	27.161		27.161
2015-09-06	15:15:00	2015-09-06 15:15:00	27.579	27.308	27.4435	27.21		27.21
2015-09-06	15:30:00	2015-09-06 15:30:00	27.505	27.259	27.382	27.186		27.186
2015-09-06	15:45:00	2015-09-06 15:45:00	27.53	27.284	27.407	27.038		27.038
2015-09-06	16:00:00	2015-09-06 16:00:00	27.628	27.407	27.5175	26.573		26.573
2015-09-06	16:15:00	2015-09-06 16:15:00	26.989	26.744	26.8665	26.475		26.475
2015-09-06	16:30:00	2015-09-06 16:30:00	26.646	26.426	26.536	26.451		26.451
2015-09-06	16:45:00	2015-09-06 16:45:00	26.573	26.329	26.451	26.426		26.426
2015-09-06	17:00:00	2015-09-06 17:00:00	26.451	26.207	26.329	26.304		26.304
2015-09-06	17:15:00	2015-09-06 17:15:00	26.353	26.134	26.2435	26.256		26.256
2015-09-06	17:30:00	2015-09-06 17:30:00	26.304	26.085	26.1945	26.231		26.231
2015-09-06	17:45:00	2015-09-06 17:45:00	26.28	26.061	26.1705	26.207		26.207
2015-09-06	18:00:00	2015-09-06 18:00:00	26.256	26.036	26.146	26.207		26.207
2015-09-06	18:15:00	2015-09-06 18:15:00	26.256	26.036	26.146	26.182		26.182
2015-09-06	18:30:00	2015-09-06 18:30:00	26.256	26.036	26.146	26.182		26.182
2015-09-06	18:45:00	2015-09-06 18:45:00	26.304	26.061	26.1825	26.207		26.207
2015-09-06	19:00:00	2015-09-06 19:00:00	26.256	26.036	26.146	26.207		26.207
2015-09-06	19:15:00	2015-09-06 19:15:00	26.28	26.061	26.1705	26.207		26.207
2015-09-06	19:30:00	2015-09-06 19:30:00	26.28	26.061	26.1705	26.207		26.207
2015-09-06	19:45:00	2015-09-06 19:45:00	26.329	26.109	26.219	26.231		26.231
2015-09-06	20:00:00	2015-09-06 20:00:00	26.329	26.109	26.219	26.256		26.256
2015-09-06	20:15:00	2015-09-06 20:15:00	26.353	26.134	26.2435	26.28		26.28
2015-09-06	20:30:00	2015-09-06 20:30:00	26.353	26.134	26.2435	26.28		26.28
2015-09-06	20:45:00	2015-09-06 20:45:00	26.329	26.085	26.207	26.256		26.256
2015-09-06	21:00:00	2015-09-06 21:00:00	26.304	26.085	26.1945	26.231		26.231
2015-09-06	21:15:00	2015-09-06 21:15:00	26.304	26.085	26.1945	26.231		26.231
2015-09-06	21:30:00	2015-09-06 21:30:00	26.28	26.061	26.1705	26.231		26.231
2015-09-06	21:45:00	2015-09-06 21:45:00	26.28	26.061	26.1705	26.207		26.207
2015-09-06	22:00:00	2015-09-06 22:00:00	26.256	26.036	26.146	26.207		26.207
2015-09-06	22:15:00	2015-09-06 22:15:00	26.207	25.987	26.097	26.207		26.207
2015-09-06	22:30:00	2015-09-06 22:30:00	26.158	25.939	26.0485	26.182		26.182
2015-09-06	22:45:00	2015-09-06 22:45:00	26.061	25.841	25.951	26.158		26.158
2015-09-06	23:00:00	2015-09-06 23:00:00	26.036	25.817	25.9265	26.134		26.134
2015-09-06	23:15:00	2015-09-06 23:15:00	26.012	25.793	25.9025	26.109		26.109
2015-09-06	23:30:00	2015-09-06 23:30:00	25.963	25.744	25.8535	26.085		26.085
2015-09-06	23:45:00	2015-09-06 23:45:00	25.914	25.695	25.8045	26.085		26.085
2015-09-07	00:00:00	2015-09-07	25.939	25.72	25.8295	26.085		26.085
2015-09-07	00:15:00	2015-09-07 00:15:00	25.939	25.72	25.8295	26.061		26.061
2015-09-07	00:30:00	2015-09-07 00:30:00	25.817	25.574	25.6955	26.061		26.061
2015-09-07	00:45:00	2015-09-07 00:45:00	25.671	25.428	25.5495	26.012		26.012
2015-09-07	01:00:00	2015-09-07 01:00:00	25.647	25.38	25.5135	26.061		26.061
2015-09-07	01:15:00	2015-09-07 01:15:00	25.428	25.113	25.2705	26.061		26.061
2015-09-07	01:30:00	2015-09-07 01:30:00	25.428	25.258	25.343	25.866		25.866
2015-09-07	01:45:00	2015-09-07 01:45:00	25.744	25.55	25.647	25.793		25.793
2015-09-07	02:00:00	2015-09-07 02:00:00	26.207	26.012	26.1095	25.793		25.793
2015-09-07	02:15:00	2015-09-07 02:15:00	26.182	25.963	26.0725	25.695		25.695
2015-09-07	02:30:00	2015-09-07 02:30:00	26.109	25.89	25.9995	25.695		25.695
2015-09-07	02:45:00	2015-09-07 02:45:00	26.036	25.793	25.9145	25.768		25.768
2015-09-07	03:00:00	2015-09-07 03:00:00	25.987	25.768	25.8775	25.939		25.939
2015-09-07	03:15:00	2015-09-07 03:15:00	25.963	25.744	25.8535	25.914		25.914
2015-09-07	03:30:00	2015-09-07 03:30:00	25.963	25.744	25.8535	25.89		25.89
2015-09-07	03:45:00	2015-09-07 03:45:00	25.89	25.671	25.7805	25.866		25.866
2015-09-07	04:00:00	2015-09-07 04:00:00	25.914	25.695	25.8045	25.866		25.866
2015-09-07	04:15:00	2015-09-07 04:15:00	25.987	25.768	25.8775	25.817		25.817
2015-09-07	04:30:00	2015-09-07 04:30:00	26.182	25.963	26.0725	26.036		26.036
2015-09-07	04:45:00	2015-09-07 04:45:00	26.207	25.987	26.097	26.134		26.134
2015-09-07	05:00:00	2015-09-07 05:00:00	26.207	25.987	26.097	26.109		26.109
2015-09-07	05:15:00	2015-09-07 05:15:00	26.182	25.963	26.0725	26.085		26.085
2015-09-07	05:30:00	2015-09-07 05:30:00	26.182	25.963	26.0725	26.134		26.134
2015-09-07	05:45:00	2015-09-07 05:45:00	26.158	25.939	26.0485	26.036		26.036
2015-09-07	06:00:00	2015-09-07 06:00:00	26.109	25.866	25.9875	26.036		26.036
2015-09-07	06:15:00	2015-09-07 06:15:00	26.109	25.89	25.9995	26.036		26.036
2015-09-07	06:30:00	2015-09-07 06:30:00	26.109	25.89	25.9995	25.987		25.987
2015-09-07	06:45:00	2015-09-07 06:45:00	26.061	25.841	25.951	25.987		25.987
2015-09-07	07:00:00	2015-09-07 07:00:00	26.061	25.841	25.951	25.987		25.987
2015-09-07	07:15:00	2015-09-07 07:15:00	26.061	25.841	25.951	25.987		25.987
2015-09-07	07:30:00	2015-09-07 07:30:00	26.036	25.841	25.9385	25.987		25.987
2015-09-07	07:45:00	2015-09-07 07:45:00	26.061	25.841	25.951	25.987		25.987
2015-09-07	08:00:00	2015-09-07 08:00:00	26.061	25.866	25.9635	25.987		25.987
2015-09-07	08:15:00	2015-09-07 08:15:00	26.085	25.89	25.9875	26.012		26.012
2015-09-07	08:30:00	2015-09-07 08:30:00	26.085	25.89	25.9875	26.036		26.036
2015-09-07	08:45:00	2015-09-07 08:45:00	26.109	25.939	26.024	26.061		26.061
2015-09-07	09:00:00	2015-09-07 09:00:00	26.182	26.012	26.097	26.085		26.085
2015-09-07	09:15:00	2015-09-07 09:15:00	26.256	26.109	26.1825	26.134		26.134
2015-09-07	09:30:00	2015-09-07 09:30:00	26.329	26.182	26.2555	26.207		26.207
2015-09-07	09:45:00	2015-09-07 09:45:00	26.426	26.28	26.353	26.256		26.256
2015-09-07	10:00:00	2015-09-07 10:00:00	26.5	26.402	26.451	26.426		26.426
2015-09-07	10:15:00	2015-09-07 10:15:00	26.646	26.475	26.5605	26.5		26.5
2015-09-07	10:30:00	2015-09-07 10:30:00	26.695	26.622	26.6585	26.598		26.598
2015-09-07	10:45:00	2015-09-07 10:45:00	26.818	26.769	26.7935	26.646		26.646
2015-09-07	11:00:00	2015-09-07 11:00:00	27.063	27.112	27.0875	26.744		26.744
2015-09-07	11:15:00	2015-09-07 11:15:00	27.333	27.431	27.382	26.818		26.818
2015-09-07	11:30:00	2015-09-07 11:30:00	27.579	27.604	27.5915	26.842		26.842
2015-09-07	11:45:00	2015-09-07 11:45:00	27.776	27.801	27.7885	26.916		26.916
2015-09-07	12:00:00	2015-09-07 12:00:00	28.023	27.974	27.9985	27.014		27.014
2015-09-07	12:15:00	2015-09-07 12:15:00	28.32	28.245	28.2825	26.989		26.989
2015-09-07	12:30:00	2015-09-07 12:30:00	28.742	28.593	28.6675	26.989		26.989
2015-09-07	12:45:00	2015-09-07 12:45:00	29.015	28.766	28.8905	27.038		27.038
2015-09-07	13:00:00	2015-09-07 13:00:00	29.04	28.692	28.866	27.087		27.087
2015-09-07	13:15:00	2015-09-07 13:15:00	29.19	28.941	29.0655	27.136		27.136
2015-09-07	13:30:00	2015-09-07 13:30:00	29.215	28.791	29.003	27.112		27.112
2015-09-07	13:45:00	2015-09-07 13:45:00	29.09	28.766	28.928	27.136		27.136
2015-09-07	14:00:00	2015-09-07 14:00:00	29.065	28.742	28.9035	27.161		27.161
2015-09-07	14:15:00	2015-09-07 14:15:00	28.99	28.692	28.841	27.235		27.235
2015-09-07	14:30:00	2015-09-07 14:30:00	28.766	28.345	28.5555	27.259		27.259
2015-09-07	14:45:00	2015-09-07 14:45:00	28.295	27.801	28.048	27.235		27.235
2015-09-07	15:00:00	2015-09-07 15:00:00	27.776	27.456	27.616	27.235		27.235
2015-09-07	15:15:00	2015-09-07 15:15:00	27.751	27.481	27.616	27.161		27.161
2015-09-07	15:30:00	2015-09-07 15:30:00	27.776	27.505	27.6405	27.014		27.014
2015-09-07	15:45:00	2015-09-07 15:45:00	27.727	27.481	27.604	26.842		26.842
2015-09-07	16:00:00	2015-09-07 16:00:00	27.727	27.505	27.616	26.793		26.793
2015-09-07	16:15:00	2015-09-07 16:15:00	27.604	27.358	27.481	26.793		26.793
2015-09-07	16:30:00	2015-09-07 16:30:00	27.481	27.259	27.37	26.72		26.72
2015-09-07	16:45:00	2015-09-07 16:45:00	27.456	27.235	27.3455	26.598		26.598
2015-09-07	17:00:00	2015-09-07 17:00:00	27.358	27.112	27.235	26.475		26.475
2015-09-07	17:15:00	2015-09-07 17:15:00	26.94	26.72	26.83	26.426		26.426
2015-09-07	17:30:00	2015-09-07 17:30:00	26.867	26.622	26.7445	26.426		26.426
2015-09-07	17:45:00	2015-09-07 17:45:00	26.573	26.329	26.451	26.402		26.402
2015-09-07	18:00:00	2015-09-07 18:00:00	26.475	26.256	26.3655	26.353		26.353
2015-09-07	18:15:00	2015-09-07 18:15:00	26.451	26.207	26.329	26.304		26.304
2015-09-07	18:30:00	2015-09-07 18:30:00	26.353	26.109	26.231	26.207		26.207
2015-09-07	18:45:00	2015-09-07 18:45:00	26.304	26.085	26.1945	26.207		26.207
2015-09-07	19:00:00	2015-09-07 19:00:00	26.304	26.061	26.1825	26.207		26.207
2015-09-07	19:15:00	2015-09-07 19:15:00	26.28	26.061	26.1705	26.182		26.182
2015-09-07	19:30:00	2015-09-07 19:30:00	26.256	26.036	26.146	26.158		26.158
2015-09-07	19:45:00	2015-09-07 19:45:00	26.231	26.012	26.1215	26.158		26.158
2015-09-07	20:00:00	2015-09-07 20:00:00	26.256	26.036	26.146	26.182		26.182
2015-09-07	20:15:00	2015-09-07 20:15:00	26.28	26.061	26.1705	26.207		26.207
2015-09-07	20:30:00	2015-09-07 20:30:00	26.304	26.085	26.1945	26.256		26.256
2015-09-07	20:45:00	2015-09-07 20:45:00	26.329	26.109	26.219	26.256		26.256
2015-09-07	21:00:00	2015-09-07 21:00:00	26.353	26.134	26.2435	26.28		26.28
2015-09-07	21:15:00	2015-09-07 21:15:00	26.402	26.182	26.292	26.304		26.304
2015-09-07	21:30:00	2015-09-07 21:30:00	26.426	26.207	26.3165	26.353		26.353
2015-09-07	21:45:00	2015-09-07 21:45:00	26.451	26.231	26.341	26.378		26.378
2015-09-07	22:00:00	2015-09-07 22:00:00	26.475	26.256	26.3655	26.402		26.402
2015-09-07	22:15:00	2015-09-07 22:15:00	26.5	26.28	26.39	26.451		26.451
2015-09-07	22:30:00	2015-09-07 22:30:00	26.524	26.304	26.414	26.451		26.451
2015-09-07	22:45:00	2015-09-07 22:45:00	26.524	26.304	26.414	26.451		26.451
2015-09-07	23:00:00	2015-09-07 23:00:00	26.5	26.28	26.39	26.451		26.451
2015-09-07	23:15:00	2015-09-07 23:15:00	26.475	26.256	26.3655	26.426		26.426
2015-09-07	23:30:00	2015-09-07 23:30:00	26.475	26.231	26.353	26.426		26.426
2015-09-07	23:45:00	2015-09-07 23:45:00	26.426	26.085	26.2555	26.402		26.402
2015-09-08	00:00:00	2015-09-08	26.329	26.109	26.219	26.402		26.402
2015-09-08	00:15:00	2015-09-08 00:15:00	26.28	26.061	26.1705	26.402		26.402
2015-09-08	00:30:00	2015-09-08 00:30:00	26.304	26.061	26.1825	26.378		26.378
2015-09-08	00:45:00	2015-09-08 00:45:00	26.231	25.987	26.109	26.353		26.353
2015-09-08	01:00:00	2015-09-08 01:00:00	26.158	25.914	26.036	26.353		26.353
2015-09-08	01:15:00	2015-09-08 01:15:00	26.134	25.89	26.012	26.329		26.329
2015-09-08	01:30:00	2015-09-08 01:30:00	26.109	25.866	25.9875	26.28		26.28
2015-09-08	01:45:00	2015-09-08 01:45:00	26.109	25.866	25.9875	26.256		26.256
2015-09-08	02:00:00	2015-09-08 02:00:00	26.134	25.914	26.024	26.256		26.256
2015-09-08	02:15:00	2015-09-08 02:15:00	26.231	26.036	26.1335	26.134		26.134
2015-09-08	02:30:00	2015-09-08 02:30:00	26.304	26.085	26.1945	26.036		26.036
2015-09-08	02:45:00	2015-09-08 02:45:00	26.304	26.061	26.1825	25.987		25.987
2015-09-08	03:00:00	2015-09-08 03:00:00	26.256	26.036	26.146	25.987		25.987
2015-09-08	03:15:00	2015-09-08 03:15:00	26.207	25.963	26.085	26.012		26.012
2015-09-08	03:30:00	2015-09-08 03:30:00	26.134	25.914	26.024	26.012		26.012
2015-09-08	03:45:00	2015-09-08 03:45:00	26.109	25.89	25.9995	26.109		26.109
2015-09-08	04:00:00	2015-09-08 04:00:00	26.158	25.939	26.0485	26.109		26.109
2015-09-08	04:15:00	2015-09-08 04:15:00	26.134	25.914	26.024	26.036		26.036
2015-09-08	04:30:00	2015-09-08 04:30:00	26.085	25.866	25.9755	26.085		26.085
2015-09-08	04:45:00	2015-09-08 04:45:00	26.085	25.866	25.9755	26.036		26.036
2015-09-08	05:00:00	2015-09-08 05:00:00	26.036	25.817	25.9265	26.012		26.012
2015-09-08	05:15:00	2015-09-08 05:15:00	26.012	25.793	25.9025	26.012		26.012
2015-09-08	05:30:00	2015-09-08 05:30:00	26.012	25.793	25.9025	26.012		26.012
2015-09-08	05:45:00	2015-09-08 05:45:00	26.182	25.987	26.0845	26.012		26.012
2015-09-08	06:00:00	2015-09-08 06:00:00	26.304	26.061	26.1825	26.109		26.109
2015-09-08	06:15:00	2015-09-08 06:15:00	26.329	26.109	26.219	26.231		26.231
2015-09-08	06:30:00	2015-09-08 06:30:00	26.304	26.085	26.1945	26.231		26.231
2015-09-08	06:45:00	2015-09-08 06:45:00	26.304	26.085	26.1945	26.231		26.231
2015-09-08	07:00:00	2015-09-08 07:00:00	26.304	26.109	26.2065	26.231		26.231
2015-09-08	07:15:00	2015-09-08 07:15:00	26.329	26.109	26.219	26.256		26.256
2015-09-08	07:30:00	2015-09-08 07:30:00	26.304	26.109	26.2065	26.231		26.231
2015-09-08	07:45:00	2015-09-08 07:45:00	26.304	26.085	26.1945	26.207		26.207
2015-09-08	08:00:00	2015-09-08 08:00:00	26.256	26.061	26.1585	26.182		26.182
2015-09-08	08:15:00	2015-09-08 08:15:00	26.231	26.036	26.1335	26.182		26.182
2015-09-08	08:30:00	2015-09-08 08:30:00	26.256	26.061	26.1585	26.182		26.182
2015-09-08	08:45:00	2015-09-08 08:45:00	26.256	26.061	26.1585	26.182		26.182
2015-09-08	09:00:00	2015-09-08 09:00:00	26.256	26.085	26.1705	26.182		26.182
2015-09-08	09:15:00	2015-09-08 09:15:00	26.28	26.109	26.1945	26.207		26.207
2015-09-08	09:30:00	2015-09-08 09:30:00	26.329	26.158	26.2435	26.207		26.207
2015-09-08	09:45:00	2015-09-08 09:45:00	26.353	26.182	26.2675	26.256		26.256
2015-09-08	10:00:00	2015-09-08 10:00:00	26.378	26.207	26.2925	26.256		26.256
2015-09-08	10:15:00	2015-09-08 10:15:00	26.402	26.256	26.329	26.304		26.304
2015-09-08	10:30:00	2015-09-08 10:30:00	26.451	26.304	26.3775	26.329		26.329
2015-09-08	10:45:00	2015-09-08 10:45:00	26.524	26.378	26.451	26.378		26.378
2015-09-08	11:00:00	2015-09-08 11:00:00	26.598	26.451	26.5245	26.426		26.426
2015-09-08	11:15:00	2015-09-08 11:15:00	26.671	26.549	26.61	26.451		26.451
2015-09-08	11:30:00	2015-09-08 11:30:00	26.769	26.695	26.732	26.549		26.549
2015-09-08	11:45:00	2015-09-08 11:45:00	26.867	26.867	26.867	26.646		26.646
2015-09-08	12:00:00	2015-09-08 12:00:00	26.989	26.793	26.891	26.744		26.744
2015-09-08	12:15:00	2015-09-08 12:15:00	27.136	27.038	27.087	26.818		26.818
2015-09-08	12:30:00	2015-09-08 12:30:00	27.235	27.136	27.1855	26.891		26.891
2015-09-08	12:45:00	2015-09-08 12:45:00	27.382	27.333	27.3575	26.989		26.989
2015-09-08	13:00:00	2015-09-08 13:00:00	27.727	27.53	27.6285	27.038		27.038
2015-09-08	13:15:00	2015-09-08 13:15:00	27.875	27.505	27.69	27.063		27.063
2015-09-08	13:30:00	2015-09-08 13:30:00	27.924	27.677	27.8005	27.087		27.087
2015-09-08	13:45:00	2015-09-08 13:45:00	28.097	27.875	27.986	27.087		27.087
2015-09-08	14:00:00	2015-09-08 14:00:00	28.171	27.924	28.0475	27.136		27.136
2015-09-08	14:15:00	2015-09-08 14:15:00	28.196	28.048	28.122	27.161		27.161
2015-09-08	14:30:00	2015-09-08 14:30:00	28.32	28.147	28.2335	27.259		27.259
2015-09-08	14:45:00	2015-09-08 14:45:00	28.568	28.245	28.4065	27.308		27.308
2015-09-08	15:00:00	2015-09-08 15:00:00	28.593	28.196	28.3945	27.333		27.333
2015-09-08	15:15:00	2015-09-08 15:15:00	28.444	28.097	28.2705	27.333		27.333
2015-09-08	15:30:00	2015-09-08 15:30:00	28.27	27.924	28.097	27.382		27.382
2015-09-08	15:45:00	2015-09-08 15:45:00	28.171	27.875	28.023	27.481		27.481
2015-09-08	16:00:00	2015-09-08 16:00:00	28.122	27.85	27.986	27.579		27.579
2015-09-08	16:15:00	2015-09-08 16:15:00	27.85	27.456	27.653	27.628		27.628
2015-09-08	16:30:00	2015-09-08 16:30:00	27.505	27.235	27.37	27.554		27.554
2015-09-08	16:45:00	2015-09-08 16:45:00	27.481	27.259	27.37	27.481		27.481
2015-09-08	17:00:00	2015-09-08 17:00:00	27.53	27.308	27.419	27.53		27.53
2015-09-08	17:15:00	2015-09-08 17:15:00	27.702	27.481	27.5915	27.554		27.554
2015-09-08	17:30:00	2015-09-08 17:30:00	27.677	27.431	27.554	27.53		27.53
2015-09-08	17:45:00	2015-09-08 17:45:00	27.604	27.358	27.481	27.431		27.431
2015-09-08	18:00:00	2015-09-08 18:00:00	27.554	27.308	27.431	27.333		27.333
2015-09-08	18:15:00	2015-09-08 18:15:00	27.481	27.235	27.358	27.161		27.161
2015-09-08	18:30:00	2015-09-08 18:30:00	27.382	27.161	27.2715	26.965		26.965
2015-09-08	18:45:00	2015-09-08 18:45:00	27.333	27.112	27.2225	26.793		26.793
2015-09-08	19:00:00	2015-09-08 19:00:00	27.382	27.161	27.2715	26.671		26.671
2015-09-08	19:15:00	2015-09-08 19:15:00	27.308	27.038	27.173	26.573		26.573
2015-09-08	19:30:00	2015-09-08 19:30:00	27.087	26.842	26.9645	26.549		26.549
2015-09-08	19:45:00	2015-09-08 19:45:00	26.867	26.646	26.7565	26.598		26.598
2015-09-08	20:00:00	2015-09-08 20:00:00	26.695	26.475	26.585	26.598		26.598
2015-09-08	20:15:00	2015-09-08 20:15:00	26.695	26.475	26.585	26.573		26.573
2015-09-08	20:30:00	2015-09-08 20:30:00	26.598	26.378	26.488	26.426		26.426
2015-09-08	20:45:00	2015-09-08 20:45:00	26.475	26.231	26.353	26.304		26.304
2015-09-08	21:00:00	2015-09-08 21:00:00	26.378	26.158	26.268	26.28		26.28
2015-09-08	21:15:00	2015-09-08 21:15:00	26.378	26.158	26.268	26.256		26.256
2015-09-08	21:30:00	2015-09-08 21:30:00	26.426	26.207	26.3165	26.28		26.28
2015-09-08	21:45:00	2015-09-08 21:45:00	26.378	26.158	26.268	26.28		26.28
2015-09-08	22:00:00	2015-09-08 22:00:00	26.378	26.158	26.268	26.28		26.28
2015-09-08	22:15:00	2015-09-08 22:15:00	26.353	26.134	26.2435	26.28		26.28
2015-09-08	22:30:00	2015-09-08 22:30:00	26.353	26.134	26.2435	26.28		26.28
2015-09-08	22:45:00	2015-09-08 22:45:00	26.353	26.134	26.2435	26.256		26.256
2015-09-08	23:00:00	2015-09-08 23:00:00	26.353	26.134	26.2435	26.256		26.256
2015-09-08	23:15:00	2015-09-08 23:15:00	26.353	26.134	26.2435	26.256		26.256
2015-09-08	23:30:00	2015-09-08 23:30:00	26.353	26.134	26.2435	26.256		26.256
2015-09-08	23:45:00	2015-09-08 23:45:00	26.353	26.134	26.2435	26.28		26.28
2015-09-09	00:00:00	2015-09-09	26.353	26.134	26.2435	26.28		26.28
2015-09-09	00:15:00	2015-09-09 00:15:00	26.378	26.158	26.268	26.304		26.304
2015-09-09	00:30:00	2015-09-09 00:30:00	26.378	26.158	26.268	26.329		26.329
2015-09-09	00:45:00	2015-09-09 00:45:00	26.402	26.182	26.292	26.353		26.353
2015-09-09	01:00:00	2015-09-09 01:00:00	26.402	26.182	26.292	26.353		26.353
2015-09-09	01:15:00	2015-09-09 01:15:00	26.402	26.182	26.292	26.378		26.378
2015-09-09	01:30:00	2015-09-09 01:30:00	26.402	26.182	26.292	26.402		26.402
2015-09-09	01:45:00	2015-09-09 01:45:00	26.402	26.182	26.292	26.402		26.402
2015-09-09	02:00:00	2015-09-09 02:00:00	26.402	26.182	26.292	26.402		26.402
2015-09-09	02:15:00	2015-09-09 02:15:00	26.402	26.158	26.28	26.402		26.402
2015-09-09	02:30:00	2015-09-09 02:30:00	26.231	25.987	26.109	26.378		26.378
2015-09-09	02:45:00	2015-09-09 02:45:00	26.207	26.036	26.1215	26.353		26.353
2015-09-09	03:00:00	2015-09-09 03:00:00	26.304	26.085	26.1945	26.353		26.353
2015-09-09	03:15:00	2015-09-09 03:15:00	26.304	26.061	26.1825	26.304		26.304
2015-09-09	03:30:00	2015-09-09 03:30:00	26.28	26.061	26.1705	26.256		26.256
2015-09-09	03:45:00	2015-09-09 03:45:00	26.28	26.061	26.1705	26.134		26.134
2015-09-09	04:00:00	2015-09-09 04:00:00	26.28	26.061	26.1705	26.085		26.085
2015-09-09	04:15:00	2015-09-09 04:15:00	26.353	26.158	26.2555	26.085		26.085
2015-09-09	04:30:00	2015-09-09 04:30:00	26.451	26.231	26.341	26.061		26.061
2015-09-09	04:45:00	2015-09-09 04:45:00	26.451	26.231	26.341	26.036		26.036
2015-09-09	05:00:00	2015-09-09 05:00:00	26.402	26.182	26.292	26.036		26.036
2015-09-09	05:15:00	2015-09-09 05:15:00	26.402	26.182	26.292	26.012		26.012
2015-09-09	05:30:00	2015-09-09 05:30:00	26.378	26.158	26.268	26.036		26.036
2015-09-09	05:45:00	2015-09-09 05:45:00	26.353	26.134	26.2435	26.109		26.109
2015-09-09	06:00:00	2015-09-09 06:00:00	26.353	26.109	26.231	26.158		26.158
2015-09-09	06:15:00	2015-09-09 06:15:00	26.304	26.085	26.1945	26.207		26.207
2015-09-09	06:30:00	2015-09-09 06:30:00	26.28	26.061	26.1705	26.207		26.207
2015-09-09	06:45:00	2015-09-09 06:45:00	26.28	26.085	26.1825	26.207		26.207
2015-09-09	07:00:00	2015-09-09 07:00:00	26.28	26.085	26.1825	26.231		26.231
2015-09-09	07:15:00	2015-09-09 07:15:00	26.304	26.085	26.1945	26.231		26.231
2015-09-09	07:30:00	2015-09-09 07:30:00	26.28	26.085	26.1825	26.256		26.256
2015-09-09	07:45:00	2015-09-09 07:45:00	26.304	26.134	26.219	26.28		26.28
2015-09-09	08:00:00	2015-09-09 08:00:00	26.353	26.182	26.2675	26.304		26.304
2015-09-09	08:15:00	2015-09-09 08:15:00	26.329	26.158	26.2435	26.304		26.304
2015-09-09	08:30:00	2015-09-09 08:30:00	26.378	26.207	26.2925	26.304		26.304
2015-09-09	08:45:00	2015-09-09 08:45:00	26.402	26.256	26.329	26.353		26.353
2015-09-09	09:00:00	2015-09-09 09:00:00	26.451	26.304	26.3775	26.353		26.353
2015-09-09	09:15:00	2015-09-09 09:15:00	26.451	26.304	26.3775	26.402		26.402
2015-09-09	09:30:00	2015-09-09 09:30:00	26.5	26.329	26.4145	26.426		26.426
2015-09-09	09:45:00	2015-09-09 09:45:00	26.5	26.304	26.402	26.402		26.402
2015-09-09	10:00:00	2015-09-09 10:00:00	26.475	26.304	26.3895	26.378		26.378
2015-09-09	10:15:00	2015-09-09 10:15:00	26.451	26.256	26.3535	26.329		26.329
2015-09-09	10:30:00	2015-09-09 10:30:00	26.426	26.256	26.341	26.329		26.329
2015-09-09	10:45:00	2015-09-09 10:45:00	26.426	26.256	26.341	26.329		26.329
2015-09-09	11:00:00	2015-09-09 11:00:00	26.426	26.256	26.341	26.329		26.329
2015-09-09	11:15:00	2015-09-09 11:15:00	26.426	26.256	26.341	26.329		26.329
2015-09-09	11:30:00	2015-09-09 11:30:00	26.426	26.256	26.341	26.353		26.353
2015-09-09	11:45:00	2015-09-09 11:45:00	26.451	26.28	26.3655	26.353		26.353
2015-09-09	12:00:00	2015-09-09 12:00:00	26.475	26.304	26.3895	26.378		26.378
2015-09-09	12:15:00	2015-09-09 12:15:00	26.5	26.329	26.4145	26.402		26.402
2015-09-09	12:30:00	2015-09-09 12:30:00	26.524	26.353	26.4385	26.402		26.402
2015-09-09	12:45:00	2015-09-09 12:45:00	26.549	26.378	26.4635	26.426		26.426
2015-09-09	13:00:00	2015-09-09 13:00:00	26.598	26.402	26.5	26.426		26.426
2015-09-09	13:15:00	2015-09-09 13:15:00	26.671	26.451	26.561	26.451		26.451
2015-09-09	13:30:00	2015-09-09 13:30:00	26.744	26.524	26.634	26.5		26.5
2015-09-09	13:45:00	2015-09-09 13:45:00	26.842	26.646	26.744	26.573		26.573
2015-09-09	14:00:00	2015-09-09 14:00:00	26.94	26.72	26.83	26.671		26.671
2015-09-09	14:15:00	2015-09-09 14:15:00	27.038	26.769	26.9035	26.793		26.793
2015-09-09	14:30:00	2015-09-09 14:30:00	27.063	26.891	26.977	26.916		26.916
2015-09-09	14:45:00	2015-09-09 14:45:00	27.087	26.891	26.989	26.891		26.891
2015-09-09	15:00:00	2015-09-09 15:00:00	27.161	27.038	27.0995	26.916		26.916
2015-09-09	15:15:00	2015-09-09 15:15:00	27.308	27.112	27.21	26.94		26.94
2015-09-09	15:30:00	2015-09-09 15:30:00	27.456	27.21	27.333	26.989		26.989
2015-09-09	15:45:00	2015-09-09 15:45:00	27.53	27.382	27.456	26.965		26.965
2015-09-09	16:00:00	2015-09-09 16:00:00	27.579	27.358	27.4685	26.989		26.989
2015-09-09	16:15:00	2015-09-09 16:15:00	27.53	27.333	27.4315	27.014		27.014
2015-09-09	16:30:00	2015-09-09 16:30:00	27.53	27.333	27.4315	26.989		26.989
2015-09-09	16:45:00	2015-09-09 16:45:00	27.431	27.259	27.345	26.965		26.965
2015-09-09	17:00:00	2015-09-09 17:00:00	27.333	27.112	27.2225	26.891		26.891
2015-09-09	17:15:00	2015-09-09 17:15:00	27.235	26.965	27.1	26.793		26.793
2015-09-09	17:30:00	2015-09-09 17:30:00	27.014	26.793	26.9035	26.744		26.744
2015-09-09	17:45:00	2015-09-09 17:45:00	26.94	26.695	26.8175	26.72		26.72
2015-09-09	18:00:00	2015-09-09 18:00:00	26.891	26.695	26.793	26.695		26.695
2015-09-09	18:15:00	2015-09-09 18:15:00	26.989	26.793	26.891	26.671		26.671
2015-09-09	18:30:00	2015-09-09 18:30:00	26.94	26.744	26.842	26.646		26.646
2015-09-09	18:45:00	2015-09-09 18:45:00	26.818	26.598	26.708	26.598		26.598
2015-09-09	19:00:00	2015-09-09 19:00:00	26.916	26.744	26.83	26.549		26.549
2015-09-09	19:15:00	2015-09-09 19:15:00	27.235	27.038	27.1365	26.5		26.5
2015-09-09	19:30:00	2015-09-09 19:30:00	27.259	27.038	27.1485	26.5		26.5
2015-09-09	19:45:00	2015-09-09 19:45:00	27.235	26.989	27.112	26.451		26.451
2015-09-09	20:00:00	2015-09-09 20:00:00	27.038	26.793	26.9155	26.475		26.475
2015-09-09	20:15:00	2015-09-09 20:15:00	26.94	26.72	26.83	26.622		26.622
2015-09-09	20:30:00	2015-09-09 20:30:00	26.891	26.646	26.7685	26.671		26.671
2015-09-09	20:45:00	2015-09-09 20:45:00	26.842	26.622	26.732	26.744		26.744
2015-09-09	21:00:00	2015-09-09 21:00:00	26.867	26.646	26.7565	26.72		26.72
2015-09-09	21:15:00	2015-09-09 21:15:00	26.793	26.573	26.683	26.598		26.598
2015-09-09	21:30:00	2015-09-09 21:30:00	26.744	26.5	26.622	26.549		26.549
2015-09-09	21:45:00	2015-09-09 21:45:00	26.646	26.426	26.536	26.549		26.549
2015-09-09	22:00:00	2015-09-09 22:00:00	26.622	26.402	26.512	26.549		26.549
2015-09-09	22:15:00	2015-09-09 22:15:00	26.5	26.28	26.39	26.402		26.402
2015-09-09	22:30:00	2015-09-09 22:30:00	26.475	26.256	26.3655	26.378		26.378
2015-09-09	22:45:00	2015-09-09 22:45:00	26.475	26.256	26.3655	26.402		26.402
2015-09-09	23:00:00	2015-09-09 23:00:00	26.451	26.231	26.341	26.378		26.378
2015-09-09	23:15:00	2015-09-09 23:15:00	26.426	26.207	26.3165	26.304		26.304
2015-09-09	23:30:00	2015-09-09 23:30:00	26.378	26.158	26.268	26.304		26.304
2015-09-09	23:45:00	2015-09-09 23:45:00	26.402	26.182	26.292	26.329		26.329
2015-09-10	00:00:00	2015-09-10	26.402	26.182	26.292	26.329		26.329
2015-09-10	00:15:00	2015-09-10 00:15:00	26.402	26.182	26.292	26.329		26.329
2015-09-10	00:30:00	2015-09-10 00:30:00	26.426	26.207	26.3165	26.329		26.329
2015-09-10	00:45:00	2015-09-10 00:45:00	26.426	26.207	26.3165	26.353		26.353
2015-09-10	01:00:00	2015-09-10 01:00:00	26.451	26.207	26.329	26.353		26.353
2015-09-10	01:15:00	2015-09-10 01:15:00	26.451	26.231	26.341	26.378		26.378
2015-09-10	01:30:00	2015-09-10 01:30:00	26.475	26.256	26.3655	26.402		26.402
2015-09-10	01:45:00	2015-09-10 01:45:00	26.475	26.256	26.3655	26.402		26.402
2015-09-10	02:00:00	2015-09-10 02:00:00	26.475	26.256	26.3655	26.402		26.402
2015-09-10	02:15:00	2015-09-10 02:15:00	26.5	26.256	26.378	26.426		26.426
2015-09-10	02:30:00	2015-09-10 02:30:00	26.5	26.28	26.39	26.426		26.426
2015-09-10	02:45:00	2015-09-10 02:45:00	26.5	26.28	26.39	26.451		26.451
2015-09-10	03:00:00	2015-09-10 03:00:00	26.5	26.28	26.39	26.451		26.451
2015-09-10	03:15:00	2015-09-10 03:15:00	26.5	26.28	26.39	26.451		26.451
2015-09-10	03:30:00	2015-09-10 03:30:00	26.475	26.256	26.3655	26.451		26.451
2015-09-10	03:45:00	2015-09-10 03:45:00	26.353	26.134	26.2435	26.451		26.451
2015-09-10	04:00:00	2015-09-10 04:00:00	26.304	26.061	26.1825	26.426		26.426
2015-09-10	04:15:00	2015-09-10 04:15:00	26.231	25.987	26.109	26.426		26.426
2015-09-10	04:30:00	2015-09-10 04:30:00	26.158	25.866	26.012	26.378		26.378
2015-09-10	04:45:00	2015-09-10 04:45:00	25.987	25.744	25.8655	26.378		26.378
2015-09-10	05:00:00	2015-09-10 05:00:00	25.89	25.671	25.7805	26.353		26.353
2015-09-10	05:15:00	2015-09-10 05:15:00	25.866	25.623	25.7445	26.353		26.353
2015-09-10	05:30:00	2015-09-10 05:30:00	25.793	25.574	25.6835	26.304		26.304
2015-09-10	05:45:00	2015-09-10 05:45:00	25.817	25.525	25.671	26.28		26.28
2015-09-10	06:00:00	2015-09-10 06:00:00	25.744	25.501	25.6225	26.28		26.28
2015-09-10	06:15:00	2015-09-10 06:15:00	25.744	25.525	25.6345	26.256		26.256
2015-09-10	06:30:00	2015-09-10 06:30:00	25.72	25.598	25.659	26.28		26.28
2015-09-10	06:45:00	2015-09-10 06:45:00	25.768	25.623	25.6955	26.256		26.256
2015-09-10	07:00:00	2015-09-10 07:00:00	25.987	25.89	25.9385	26.28		26.28
2015-09-10	07:15:00	2015-09-10 07:15:00	26.304	26.158	26.231	26.329		26.329
2015-09-10	07:30:00	2015-09-10 07:30:00	26.402	26.207	26.3045	26.329		26.329
2015-09-10	07:45:00	2015-09-10 07:45:00	26.378	26.158	26.268	26.378		26.378
2015-09-10	08:00:00	2015-09-10 08:00:00	26.28	26.085	26.1825	26.158		26.158
2015-09-10	08:15:00	2015-09-10 08:15:00	26.28	26.109	26.1945	26.28		26.28
2015-09-10	08:30:00	2015-09-10 08:30:00	26.329	26.158	26.2435	26.304		26.304
2015-09-10	08:45:00	2015-09-10 08:45:00	26.378	26.207	26.2925	26.329		26.329
2015-09-10	09:00:00	2015-09-10 09:00:00	26.426	26.231	26.3285	26.353		26.353
2015-09-10	09:15:00	2015-09-10 09:15:00	26.451	26.28	26.3655	26.402		26.402
2015-09-10	09:30:00	2015-09-10 09:30:00	26.549	26.378	26.4635	26.426		26.426
2015-09-10	09:45:00	2015-09-10 09:45:00	26.549	26.402	26.4755	26.451		26.451
2015-09-10	10:00:00	2015-09-10 10:00:00	26.549	26.378	26.4635	26.5		26.5
2015-09-10	10:15:00	2015-09-10 10:15:00	26.573	26.426	26.4995	26.451		26.451
2015-09-10	10:30:00	2015-09-10 10:30:00	26.573	26.402	26.4875	26.475		26.475
2015-09-10	10:45:00	2015-09-10 10:45:00	26.598	26.402	26.5	26.524		26.524
2015-09-10	11:00:00	2015-09-10 11:00:00	26.598	26.426	26.512	26.5		26.5
2015-09-10	11:15:00	2015-09-10 11:15:00	26.573	26.378	26.4755	26.451		26.451
2015-09-10	11:30:00	2015-09-10 11:30:00	26.524	26.329	26.4265	26.451		26.451
2015-09-10	11:45:00	2015-09-10 11:45:00	26.5	26.329	26.4145	26.426		26.426
2015-09-10	12:00:00	2015-09-10 12:00:00	26.5	26.304	26.402	26.426		26.426
2015-09-10	12:15:00	2015-09-10 12:15:00	26.5	26.304	26.402	26.426		26.426
2015-09-10	12:30:00	2015-09-10 12:30:00	26.5	26.304	26.402	26.451		26.451
2015-09-10	12:45:00	2015-09-10 12:45:00	26.524	26.329	26.4265	26.451		26.451
2015-09-10	13:00:00	2015-09-10 13:00:00	26.524	26.329	26.4265	26.475		26.475
2015-09-10	13:15:00	2015-09-10 13:15:00	26.573	26.378	26.4755	26.475		26.475
2015-09-10	13:30:00	2015-09-10 13:30:00	26.622	26.426	26.524	26.524		26.524
2015-09-10	13:45:00	2015-09-10 13:45:00	26.646	26.451	26.5485	26.549		26.549
2015-09-10	14:00:00	2015-09-10 14:00:00	26.695	26.475	26.585	26.598		26.598
2015-09-10	14:15:00	2015-09-10 14:15:00	26.72	26.5	26.61	26.598		26.598
2015-09-10	14:30:00	2015-09-10 14:30:00	26.744	26.524	26.634	26.622		26.622
2015-09-10	14:45:00	2015-09-10 14:45:00	26.818	26.598	26.708	26.695		26.695
2015-09-10	15:00:00	2015-09-10 15:00:00	26.867	26.646	26.7565	26.744		26.744
2015-09-10	15:15:00	2015-09-10 15:15:00	26.94	26.744	26.842	26.793		26.793
2015-09-10	15:30:00	2015-09-10 15:30:00	27.014	26.769	26.8915	26.818		26.818
2015-09-10	15:45:00	2015-09-10 15:45:00	26.989	26.769	26.879	26.818		26.818
2015-09-10	16:00:00	2015-09-10 16:00:00	27.038	26.867	26.9525	26.842		26.842
2015-09-10	16:15:00	2015-09-10 16:15:00	27.136	26.965	27.0505	26.94		26.94
2015-09-10	16:30:00	2015-09-10 16:30:00	27.186	26.965	27.0755	26.965		26.965
2015-09-10	16:45:00	2015-09-10 16:45:00	27.161	26.989	27.075	26.965		26.965
2015-09-10	17:00:00	2015-09-10 17:00:00	27.136	26.94	27.038	26.94		26.94
2015-09-10	17:15:00	2015-09-10 17:15:00	27.112	26.867	26.9895	26.916		26.916
2015-09-10	17:30:00	2015-09-10 17:30:00	27.014	26.769	26.8915	26.891		26.891
2015-09-10	17:45:00	2015-09-10 17:45:00	26.867	26.646	26.7565	26.891		26.891
2015-09-10	18:00:00	2015-09-10 18:00:00	26.744	26.524	26.634	26.867		26.867
2015-09-10	18:15:00	2015-09-10 18:15:00	26.622	26.426	26.524	26.842		26.842
2015-09-10	18:30:00	2015-09-10 18:30:00	26.573	26.378	26.4755	26.818		26.818
2015-09-10	18:45:00	2015-09-10 18:45:00	26.598	26.426	26.512	26.769		26.769
2015-09-10	19:00:00	2015-09-10 19:00:00	26.573	26.329	26.451	26.744		26.744
2015-09-10	19:15:00	2015-09-10 19:15:00	26.5	26.28	26.39	26.671		26.671
2015-09-10	19:30:00	2015-09-10 19:30:00	26.573	26.353	26.463	26.622		26.622
2015-09-10	19:45:00	2015-09-10 19:45:00	26.451	25.939	26.195	26.622		26.622
2015-09-10	20:00:00	2015-09-10 20:00:00	25.987	25.793	25.89	26.598		26.598
2015-09-10	20:15:00	2015-09-10 20:15:00	26.451	26.329	26.39	26.353		26.353
2015-09-10	20:30:00	2015-09-10 20:30:00	26.72	26.5	26.61	26.256		26.256
2015-09-10	20:45:00	2015-09-10 20:45:00	26.744	26.524	26.634	26.158		26.158
2015-09-10	21:00:00	2015-09-10 21:00:00	26.72	26.475	26.5975	26.28		26.28
2015-09-10	21:15:00	2015-09-10 21:15:00	26.671	26.426	26.5485	26.402		26.402
2015-09-10	21:30:00	2015-09-10 21:30:00	26.72	26.5	26.61	26.524		26.524
2015-09-10	21:45:00	2015-09-10 21:45:00	26.598	26.353	26.4755	26.304		26.304
2015-09-10	22:00:00	2015-09-10 22:00:00	26.598	26.378	26.488	26.134		26.134
2015-09-10	22:15:00	2015-09-10 22:15:00	26.671	26.475	26.573	26.304		26.304
2015-09-10	22:30:00	2015-09-10 22:30:00	26.744	26.5	26.622	26.671		26.671
2015-09-10	22:45:00	2015-09-10 22:45:00	26.769	26.549	26.659	26.695		26.695
2015-09-10	23:00:00	2015-09-10 23:00:00	26.744	26.5	26.622	26.646		26.646
2015-09-10	23:15:00	2015-09-10 23:15:00	26.744	26.524	26.634	26.671		26.671
2015-09-10	23:30:00	2015-09-10 23:30:00	26.744	26.5	26.622	26.622		26.622
2015-09-10	23:45:00	2015-09-10 23:45:00	26.646	26.402	26.524	26.549		26.549
2015-09-11	00:00:00	2015-09-11	26.598	26.378	26.488	26.5		26.5
2015-09-11	00:15:00	2015-09-11 00:15:00	26.549	26.329	26.439	26.475		26.475
2015-09-11	00:30:00	2015-09-11 00:30:00	26.549	26.329	26.439	26.451		26.451
2015-09-11	00:45:00	2015-09-11 00:45:00	26.549	26.304	26.4265	26.475		26.475
2015-09-11	01:00:00	2015-09-11 01:00:00	26.573	26.353	26.463	26.5		26.5
2015-09-11	01:15:00	2015-09-11 01:15:00	26.598	26.378	26.488	26.524		26.524
2015-09-11	01:30:00	2015-09-11 01:30:00	26.598	26.353	26.4755	26.5		26.5
2015-09-11	01:45:00	2015-09-11 01:45:00	26.573	26.353	26.463	26.5		26.5
2015-09-11	02:00:00	2015-09-11 02:00:00	26.549	26.329	26.439	26.5		26.5
2015-09-11	02:15:00	2015-09-11 02:15:00	26.549	26.329	26.439	26.5		26.5
2015-09-11	02:30:00	2015-09-11 02:30:00	26.549	26.329	26.439	26.475		26.475
2015-09-11	02:45:00	2015-09-11 02:45:00	26.549	26.304	26.4265	26.475		26.475
2015-09-11	03:00:00	2015-09-11 03:00:00	26.524	26.28	26.402	26.451		26.451
2015-09-11	03:15:00	2015-09-11 03:15:00	26.5	26.28	26.39	26.451		26.451
2015-09-11	03:30:00	2015-09-11 03:30:00	26.5	26.28	26.39	26.451		26.451
2015-09-11	03:45:00	2015-09-11 03:45:00	26.5	26.28	26.39	26.451		26.451
2015-09-11	04:00:00	2015-09-11 04:00:00	26.475	26.256	26.3655	26.451		26.451
2015-09-11	04:15:00	2015-09-11 04:15:00	26.451	26.231	26.341	26.426		26.426
2015-09-11	04:30:00	2015-09-11 04:30:00	26.378	26.134	26.256	26.402		26.402
2015-09-11	04:45:00	2015-09-11 04:45:00	26.182	25.89	26.036	26.353		26.353
2015-09-11	05:00:00	2015-09-11 05:00:00	26.158	25.841	25.9995	26.329		26.329
2015-09-11	05:15:00	2015-09-11 05:15:00	25.866	25.623	25.7445	26.28		26.28
2015-09-11	05:30:00	2015-09-11 05:30:00	25.866	25.623	25.7445	26.231		26.231
2015-09-11	05:45:00	2015-09-11 05:45:00	25.695	25.501	25.598	26.182		26.182
2015-09-11	06:00:00	2015-09-11 06:00:00	25.331	25.21	25.2705	26.134		26.134
2015-09-11	06:15:00	2015-09-11 06:15:00	25.089	24.944	25.0165	26.036		26.036
2015-09-11	06:30:00	2015-09-11 06:30:00	25.137	25.065	25.101	26.012		26.012
2015-09-11	06:45:00	2015-09-11 06:45:00	25.162	25.065	25.1135	26.036		26.036
2015-09-11	07:00:00	2015-09-11 07:00:00	25.162	24.992	25.077	26.085		26.085
2015-09-11	07:15:00	2015-09-11 07:15:00	25.089	24.992	25.0405	26.109		26.109
2015-09-11	07:30:00	2015-09-11 07:30:00	25.21	25.137	25.1735	26.109		26.109
2015-09-11	07:45:00	2015-09-11 07:45:00	24.944	24.944	24.944	26.182		26.182
2015-09-11	08:00:00	2015-09-11 08:00:00	25.04	24.944	24.992	26.207		26.207
2015-09-11	08:15:00	2015-09-11 08:15:00	25.817	25.841	25.829	26.256		26.256
2015-09-11	08:30:00	2015-09-11 08:30:00	26.256	26.061	26.1585	26.353		26.353
2015-09-11	08:45:00	2015-09-11 08:45:00	26.207	26.012	26.1095	26.036		26.036
2015-09-11	09:00:00	2015-09-11 09:00:00	26.231	26.061	26.146	26.085		26.085
2015-09-11	09:15:00	2015-09-11 09:15:00	26.28	26.085	26.1825	26.231		26.231
2015-09-11	09:30:00	2015-09-11 09:30:00	26.353	26.182	26.2675	26.256		26.256
2015-09-11	09:45:00	2015-09-11 09:45:00	26.402	26.28	26.341	26.304		26.304
2015-09-11	10:00:00	2015-09-11 10:00:00	26.549	26.378	26.4635	26.378		26.378
2015-09-11	10:15:00	2015-09-11 10:15:00	26.646	26.475	26.5605	26.451		26.451
2015-09-11	10:30:00	2015-09-11 10:30:00	26.524	26.353	26.4385	26.451		26.451
2015-09-11	10:45:00	2015-09-11 10:45:00	26.426	26.28	26.353	26.353		26.353
2015-09-11	11:00:00	2015-09-11 11:00:00	26.5	26.329	26.4145	26.402		26.402
2015-09-11	11:15:00	2015-09-11 11:15:00	26.524	26.329	26.4265	26.451		26.451
2015-09-11	11:30:00	2015-09-11 11:30:00	26.5	26.329	26.4145	26.451		26.451
2015-09-11	11:45:00	2015-09-11 11:45:00	26.5	26.304	26.402	26.426		26.426
2015-09-11	12:00:00	2015-09-11 12:00:00	26.5	26.28	26.39	26.402		26.402
2015-09-11	12:15:00	2015-09-11 12:15:00	26.475	26.28	26.3775	26.402		26.402
2015-09-11	12:30:00	2015-09-11 12:30:00	26.475	26.28	26.3775	26.402		26.402
2015-09-11	12:45:00	2015-09-11 12:45:00	26.475	26.28	26.3775	26.402		26.402
2015-09-11	13:00:00	2015-09-11 13:00:00	26.475	26.28	26.3775	26.402		26.402
2015-09-11	13:15:00	2015-09-11 13:15:00	26.5	26.28	26.39	26.402		26.402
2015-09-11	13:30:00	2015-09-11 13:30:00	26.5	26.28	26.39	26.426		26.426
2015-09-11	13:45:00	2015-09-11 13:45:00	26.5	26.304	26.402	26.426		26.426
2015-09-11	14:00:00	2015-09-11 14:00:00	26.549	26.329	26.439	26.451		26.451
2015-09-11	14:15:00	2015-09-11 14:15:00	26.549	26.353	26.451	26.451		26.451
2015-09-11	14:30:00	2015-09-11 14:30:00	26.573	26.353	26.463	26.475		26.475
2015-09-11	14:45:00	2015-09-11 14:45:00	26.598	26.402	26.5	26.475		26.475
2015-09-11	15:00:00	2015-09-11 15:00:00	26.646	26.451	26.5485	26.5		26.5
2015-09-11	15:15:00	2015-09-11 15:15:00	26.671	26.475	26.573	26.549		26.549
2015-09-11	15:30:00	2015-09-11 15:30:00	26.72	26.5	26.61	26.549		26.549
2015-09-11	15:45:00	2015-09-11 15:45:00	26.744	26.524	26.634	26.598		26.598
2015-09-11	16:00:00	2015-09-11 16:00:00	26.769	26.549	26.659	26.671		26.671
2015-09-11	16:15:00	2015-09-11 16:15:00	26.793	26.549	26.671	26.695		26.695
2015-09-11	16:30:00	2015-09-11 16:30:00	26.769	26.549	26.659	26.695		26.695
2015-09-11	16:45:00	2015-09-11 16:45:00	26.769	26.598	26.6835	26.646		26.646
2015-09-11	17:00:00	2015-09-11 17:00:00	26.744	26.549	26.6465	26.622		26.622
2015-09-11	17:15:00	2015-09-11 17:15:00	26.646	26.451	26.5485	26.573		26.573
2015-09-11	17:30:00	2015-09-11 17:30:00	26.573	26.378	26.4755	26.549		26.549
2015-09-11	17:45:00	2015-09-11 17:45:00	26.451	26.256	26.3535	26.5		26.5
2015-09-11	18:00:00	2015-09-11 18:00:00	26.182	26.036	26.109	26.451		26.451
2015-09-11	18:15:00	2015-09-11 18:15:00	25.987	25.866	25.9265	26.329		26.329
2015-09-11	18:30:00	2015-09-11 18:30:00	25.817	25.793	25.805	26.134		26.134
2015-09-11	18:45:00	2015-09-11 18:45:00	25.647	25.623	25.635	26.085		26.085
2015-09-11	19:00:00	2015-09-11 19:00:00	25.525	25.331	25.428	26.085		26.085
2015-09-11	19:15:00	2015-09-11 19:15:00	25.355	25.113	25.234	26.012		26.012
2015-09-11	19:30:00	2015-09-11 19:30:00	25.355	25.089	25.222	25.939		25.939
2015-09-11	19:45:00	2015-09-11 19:45:00	25.574	25.404	25.489	25.914		25.914
2015-09-11	20:00:00	2015-09-11 20:00:00	25.793	25.574	25.6835	25.866		25.866
2015-09-11	20:15:00	2015-09-11 20:15:00	25.671	25.162	25.4165	25.744		25.744
2015-09-11	20:30:00	2015-09-11 20:30:00	25.404	25.186	25.295	25.793		25.793
2015-09-11	20:45:00	2015-09-11 20:45:00	25.501	25.283	25.392	25.817		25.817
2015-09-11	21:00:00	2015-09-11 21:00:00	26.158	26.061	26.1095	25.817		25.817
2015-09-11	21:15:00	2015-09-11 21:15:00	26.524	26.304	26.414	25.793		25.793
2015-09-11	21:30:00	2015-09-11 21:30:00	26.646	26.402	26.524	25.695		25.695
2015-09-11	21:45:00	2015-09-11 21:45:00	26.451	26.207	26.329	25.987		25.987
2015-09-11	22:00:00	2015-09-11 22:00:00	26.426	26.207	26.3165	26.158		26.158
2015-09-11	22:15:00	2015-09-11 22:15:00	26.451	26.207	26.329	25.914		25.914
2015-09-11	22:30:00	2015-09-11 22:30:00	26.28	26.061	26.1705	25.89		25.89
2015-09-11	22:45:00	2015-09-11 22:45:00	26.329	26.109	26.219	25.987		25.987
2015-09-11	23:00:00	2015-09-11 23:00:00	26.378	26.158	26.268	26.158		26.158
2015-09-11	23:15:00	2015-09-11 23:15:00	26.524	26.329	26.4265	26.402		26.402
2015-09-11	23:30:00	2015-09-11 23:30:00	26.598	26.353	26.4755	26.451		26.451
2015-09-11	23:45:00	2015-09-11 23:45:00	26.573	26.353	26.463	26.5		26.5
2015-09-12	00:00:00	2015-09-12	26.524	26.28	26.402	26.426		26.426
2015-09-12	00:15:00	2015-09-12 00:15:00	26.5	26.28	26.39	26.451		26.451
2015-09-12	00:30:00	2015-09-12 00:30:00	26.524	26.304	26.414	26.451		26.451
2015-09-12	00:45:00	2015-09-12 00:45:00	26.524	26.304	26.414	26.451		26.451
2015-09-12	01:00:00	2015-09-12 01:00:00	26.524	26.28	26.402	26.451		26.451
2015-09-12	01:15:00	2015-09-12 01:15:00	26.5	26.256	26.378	26.426		26.426
2015-09-12	01:30:00	2015-09-12 01:30:00	26.475	26.256	26.3655	26.402		26.402
2015-09-12	01:45:00	2015-09-12 01:45:00	26.475	26.256	26.3655	26.426		26.426
2015-09-12	02:00:00	2015-09-12 02:00:00	26.5	26.28	26.39	26.426		26.426
2015-09-12	02:15:00	2015-09-12 02:15:00	26.5	26.28	26.39	26.426		26.426
2015-09-12	02:30:00	2015-09-12 02:30:00	26.5	26.28	26.39	26.426		26.426
2015-09-12	02:45:00	2015-09-12 02:45:00	26.5	26.28	26.39	26.426		26.426
2015-09-12	03:00:00	2015-09-12 03:00:00	26.5	26.28	26.39	26.426		26.426
2015-09-12	03:15:00	2015-09-12 03:15:00	26.524	26.304	26.414	26.451		26.451
2015-09-12	03:30:00	2015-09-12 03:30:00	26.524	26.304	26.414	26.451		26.451
2015-09-12	03:45:00	2015-09-12 03:45:00	26.524	26.304	26.414	26.451		26.451
2015-09-12	04:00:00	2015-09-12 04:00:00	26.5	26.28	26.39	26.451		26.451
2015-09-12	04:15:00	2015-09-12 04:15:00	26.5	26.28	26.39	26.426		26.426
2015-09-12	04:30:00	2015-09-12 04:30:00	26.475	26.256	26.3655	26.426		26.426
2015-09-12	04:45:00	2015-09-12 04:45:00	26.475	26.256	26.3655	26.402		26.402
2015-09-12	05:00:00	2015-09-12 05:00:00	26.426	26.207	26.3165	26.378		26.378
2015-09-12	05:15:00	2015-09-12 05:15:00	26.256	26.012	26.134	26.378		26.378
2015-09-12	05:30:00	2015-09-12 05:30:00	26.231	26.012	26.1215	26.353		26.353
2015-09-12	05:45:00	2015-09-12 05:45:00	26.207	25.963	26.085	26.329		26.329
2015-09-12	06:00:00	2015-09-12 06:00:00	26.158	25.939	26.0485	26.304		26.304
2015-09-12	06:15:00	2015-09-12 06:15:00	26.085	25.89	25.9875	26.28		26.28
2015-09-12	06:30:00	2015-09-12 06:30:00	26.012	25.866	25.939	26.256		26.256
2015-09-12	06:45:00	2015-09-12 06:45:00	25.939	25.914	25.9265	26.231		26.231
2015-09-12	07:00:00	2015-09-12 07:00:00	25.963	25.963	25.963	26.304		26.304
2015-09-12	07:15:00	2015-09-12 07:15:00	26.012	25.987	25.9995	26.329		26.329
2015-09-12	07:30:00	2015-09-12 07:30:00	26.085	26.109	26.097	26.353		26.353
2015-09-12	07:45:00	2015-09-12 07:45:00	26.158	26.134	26.146	26.402		26.402
2015-09-12	08:00:00	2015-09-12 08:00:00	26.256	26.182	26.219	26.451		26.451
2015-09-12	08:15:00	2015-09-12 08:15:00	26.329	26.329	26.329	26.475		26.475
2015-09-12	08:30:00	2015-09-12 08:30:00	26.451	26.475	26.463	26.524		26.524
2015-09-12	08:45:00	2015-09-12 08:45:00	26.549	26.451	26.5	26.622		26.622
2015-09-12	09:00:00	2015-09-12 09:00:00	26.622	26.5	26.561	26.695		26.695
2015-09-12	09:15:00	2015-09-12 09:15:00	26.549	26.378	26.4635	26.72		26.72
2015-09-12	09:30:00	2015-09-12 09:30:00	26.549	26.426	26.4875	26.744		26.744
2015-09-12	09:45:00	2015-09-12 09:45:00	26.598	26.426	26.512	26.744		26.744
2015-09-12	10:00:00	2015-09-12 10:00:00	26.622	26.475	26.5485	26.598		26.598
2015-09-12	10:15:00	2015-09-12 10:15:00	26.671	26.5	26.5855	26.646		26.646
2015-09-12	10:30:00	2015-09-12 10:30:00	26.744	26.622	26.683	26.72		26.72
2015-09-12	10:45:00	2015-09-12 10:45:00	26.818	26.769	26.7935	26.793		26.793
2015-09-12	11:00:00	2015-09-12 11:00:00	26.867	26.695	26.781	26.72		26.72
2015-09-12	11:15:00	2015-09-12 11:15:00	26.818	26.646	26.732	26.695		26.695
2015-09-12	11:30:00	2015-09-12 11:30:00	26.744	26.573	26.6585	26.622		26.622
2015-09-12	11:45:00	2015-09-12 11:45:00	26.695	26.5	26.5975	26.622		26.622
2015-09-12	12:00:00	2015-09-12 12:00:00	26.646	26.451	26.5485	26.573		26.573
2015-09-12	12:15:00	2015-09-12 12:15:00	26.549	26.353	26.451	26.475		26.475
2015-09-12	12:30:00	2015-09-12 12:30:00	26.549	26.353	26.451	26.5		26.5
2015-09-12	12:45:00	2015-09-12 12:45:00	26.549	26.353	26.451	26.5		26.5
2015-09-12	13:00:00	2015-09-12 13:00:00	26.549	26.353	26.451	26.475		26.475
2015-09-12	13:15:00	2015-09-12 13:15:00	26.549	26.329	26.439	26.475		26.475
2015-09-12	13:30:00	2015-09-12 13:30:00	26.549	26.353	26.451	26.475		26.475
2015-09-12	13:45:00	2015-09-12 13:45:00	26.524	26.329	26.4265	26.475		26.475
2015-09-12	14:00:00	2015-09-12 14:00:00	26.549	26.329	26.439	26.475		26.475
2015-09-12	14:15:00	2015-09-12 14:15:00	26.573	26.353	26.463	26.475		26.475
2015-09-12	14:30:00	2015-09-12 14:30:00	26.598	26.378	26.488	26.5		26.5
2015-09-12	14:45:00	2015-09-12 14:45:00	26.622	26.402	26.512	26.524		26.524
2015-09-12	15:00:00	2015-09-12 15:00:00	26.646	26.451	26.5485	26.549		26.549
2015-09-12	15:15:00	2015-09-12 15:15:00	26.695	26.475	26.585	26.573		26.573
2015-09-12	15:30:00	2015-09-12 15:30:00	26.744	26.549	26.6465	26.598		26.598
2015-09-12	15:45:00	2015-09-12 15:45:00	26.842	26.622	26.732	26.622		26.622
2015-09-12	16:00:00	2015-09-12 16:00:00	26.965	26.744	26.8545	26.646		26.646
2015-09-12	16:15:00	2015-09-12 16:15:00	27.038	26.818	26.928	26.769		26.769
2015-09-12	16:30:00	2015-09-12 16:30:00	27.063	26.842	26.9525	26.965		26.965
2015-09-12	16:45:00	2015-09-12 16:45:00	27.087	26.842	26.9645	26.965		26.965
2015-09-12	17:00:00	2015-09-12 17:00:00	27.014	26.793	26.9035	26.965		26.965
2015-09-12	17:15:00	2015-09-12 17:15:00	26.94	26.72	26.83	26.916		26.916
2015-09-12	17:30:00	2015-09-12 17:30:00	26.867	26.622	26.7445	26.867		26.867
2015-09-12	17:45:00	2015-09-12 17:45:00	26.744	26.475	26.6095	26.842		26.842
2015-09-12	18:00:00	2015-09-12 18:00:00	26.573	26.353	26.463	26.793		26.793
2015-09-12	18:15:00	2015-09-12 18:15:00	26.329	26.207	26.268	26.744		26.744
2015-09-12	18:30:00	2015-09-12 18:30:00	26.158	26.012	26.085	26.646		26.646
2015-09-12	18:45:00	2015-09-12 18:45:00	25.963	25.793	25.878	26.549		26.549
2015-09-12	19:00:00	2015-09-12 19:00:00	25.768	25.623	25.6955	26.451		26.451
2015-09-12	19:15:00	2015-09-12 19:15:00	25.501	25.501	25.501	26.378		26.378
2015-09-12	19:30:00	2015-09-12 19:30:00	25.283	25.258	25.2705	26.28		26.28
2015-09-12	19:45:00	2015-09-12 19:45:00	24.992	25.04	25.016	26.28		26.28
2015-09-12	20:00:00	2015-09-12 20:00:00	24.702	24.798	24.75	26.28		26.28
2015-09-12	20:15:00	2015-09-12 20:15:00	24.557	24.605	24.581	26.231		26.231
2015-09-12	20:30:00	2015-09-12 20:30:00	25.355	25.162	25.2585	26.207		26.207
2015-09-12	20:45:00	2015-09-12 20:45:00	25.623	25.453	25.538	25.987		25.987
2015-09-12	21:00:00	2015-09-12 21:00:00	25.307	24.75	25.0285	25.768		25.768
2015-09-12	21:15:00	2015-09-12 21:15:00	25.016	24.798	24.907	25.574		25.574
2015-09-12	21:30:00	2015-09-12 21:30:00	25.623	25.574	25.5985	25.623		25.623
2015-09-12	21:45:00	2015-09-12 21:45:00	26.353	26.158	26.2555	25.695		25.695
2015-09-12	22:00:00	2015-09-12 22:00:00	26.524	26.304	26.414	25.768		25.768
2015-09-12	22:15:00	2015-09-12 22:15:00	26.378	26.134	26.256	26.109		26.109
2015-09-12	22:30:00	2015-09-12 22:30:00	26.402	26.158	26.28	26.329		26.329
2015-09-12	22:45:00	2015-09-12 22:45:00	26.329	26.085	26.207	25.914		25.914
2015-09-12	23:00:00	2015-09-12 23:00:00	26.304	26.085	26.1945	25.914		25.914
2015-09-12	23:15:00	2015-09-12 23:15:00	26.329	26.109	26.219	26.109		26.109
2015-09-12	23:30:00	2015-09-12 23:30:00	26.475	26.256	26.3655	26.451		26.451
2015-09-12	23:45:00	2015-09-12 23:45:00	26.573	26.353	26.463	26.524		26.524
2015-09-13	00:00:00	2015-09-13	26.622	26.402	26.512	26.549		26.549
2015-09-13	00:15:00	2015-09-13 00:15:00	26.598	26.353	26.4755	26.451		26.451
2015-09-13	00:30:00	2015-09-13 00:30:00	26.5	26.28	26.39	26.426		26.426
2015-09-13	00:45:00	2015-09-13 00:45:00	26.524	26.304	26.414	26.451		26.451
2015-09-13	01:00:00	2015-09-13 01:00:00	26.524	26.28	26.402	26.451		26.451
2015-09-13	01:15:00	2015-09-13 01:15:00	26.524	26.304	26.414	26.475		26.475
2015-09-13	01:30:00	2015-09-13 01:30:00	26.524	26.304	26.414	26.451		26.451
2015-09-13	01:45:00	2015-09-13 01:45:00	26.5	26.28	26.39	26.451		26.451
2015-09-13	02:00:00	2015-09-13 02:00:00	26.5	26.28	26.39	26.426		26.426
2015-09-13	02:15:00	2015-09-13 02:15:00	26.5	26.28	26.39	26.426		26.426
2015-09-13	02:30:00	2015-09-13 02:30:00	26.5	26.28	26.39	26.426		26.426
2015-09-13	02:45:00	2015-09-13 02:45:00	26.5	26.256	26.378	26.426		26.426
2015-09-13	03:00:00	2015-09-13 03:00:00	26.475	26.256	26.3655	26.426		26.426
2015-09-13	03:15:00	2015-09-13 03:15:00	26.475	26.256	26.3655	26.402		26.402
2015-09-13	03:30:00	2015-09-13 03:30:00	26.475	26.256	26.3655	26.402		26.402
2015-09-13	03:45:00	2015-09-13 03:45:00	26.475	26.256	26.3655	26.402		26.402
2015-09-13	04:00:00	2015-09-13 04:00:00	26.475	26.256	26.3655	26.402		26.402
2015-09-13	04:15:00	2015-09-13 04:15:00	26.5	26.28	26.39	26.426		26.426
2015-09-13	04:30:00	2015-09-13 04:30:00	26.5	26.28	26.39	26.451		26.451
2015-09-13	04:45:00	2015-09-13 04:45:00	26.524	26.304	26.414	26.451		26.451
2015-09-13	05:00:00	2015-09-13 05:00:00	26.524	26.304	26.414	26.475		26.475
2015-09-13	05:15:00	2015-09-13 05:15:00	26.5	26.28	26.39	26.475		26.475
2015-09-13	05:30:00	2015-09-13 05:30:00	26.475	26.231	26.353	26.475		26.475
2015-09-13	05:45:00	2015-09-13 05:45:00	26.451	26.231	26.341	26.451		26.451
2015-09-13	06:00:00	2015-09-13 06:00:00	26.28	26.061	26.1705	26.426		26.426
2015-09-13	06:15:00	2015-09-13 06:15:00	26.304	26.085	26.1945	26.402		26.402
2015-09-13	06:30:00	2015-09-13 06:30:00	26.28	26.109	26.1945	26.402		26.402
2015-09-13	06:45:00	2015-09-13 06:45:00	26.207	26.134	26.1705	26.353		26.353
2015-09-13	07:00:00	2015-09-13 07:00:00	26.207	26.158	26.1825	26.304		26.304
2015-09-13	07:15:00	2015-09-13 07:15:00	26.231	26.256	26.2435	26.353		26.353
2015-09-13	07:30:00	2015-09-13 07:30:00	26.329	26.378	26.3535	26.402		26.402
2015-09-13	07:45:00	2015-09-13 07:45:00	26.451	26.475	26.463	26.475		26.475
2015-09-13	08:00:00	2015-09-13 08:00:00	26.646	26.598	26.622	26.549		26.549
2015-09-13	08:15:00	2015-09-13 08:15:00	26.891	26.867	26.879	26.646		26.646
2015-09-13	08:30:00	2015-09-13 08:30:00	26.818	26.695	26.7565	26.744		26.744
2015-09-13	08:45:00	2015-09-13 08:45:00	26.793	26.695	26.744	26.793		26.793
2015-09-13	09:00:00	2015-09-13 09:00:00	26.842	26.793	26.8175	26.842		26.842
2015-09-13	09:15:00	2015-09-13 09:15:00	26.916	26.818	26.867	26.916		26.916
2015-09-13	09:30:00	2015-09-13 09:30:00	26.94	26.769	26.8545	26.94		26.94
2015-09-13	09:45:00	2015-09-13 09:45:00	26.867	26.671	26.769	27.014		27.014
2015-09-13	10:00:00	2015-09-13 10:00:00	26.769	26.598	26.6835	27.038		27.038
2015-09-13	10:15:00	2015-09-13 10:15:00	26.842	26.671	26.7565	27.014		27.014
2015-09-13	10:30:00	2015-09-13 10:30:00	26.842	26.646	26.744	26.989		26.989
2015-09-13	10:45:00	2015-09-13 10:45:00	26.842	26.671	26.7565	26.965		26.965
2015-09-13	11:00:00	2015-09-13 11:00:00	26.94	26.891	26.9155	26.891		26.891
2015-09-13	11:15:00	2015-09-13 11:15:00	27.038	26.916	26.977	26.916		26.916
2015-09-13	11:30:00	2015-09-13 11:30:00	26.989	26.842	26.9155	26.867		26.867
2015-09-13	11:45:00	2015-09-13 11:45:00	26.867	26.671	26.769	26.72		26.72
2015-09-13	12:00:00	2015-09-13 12:00:00	26.744	26.549	26.6465	26.646		26.646
2015-09-13	12:15:00	2015-09-13 12:15:00	26.695	26.5	26.5975	26.646		26.646
2015-09-13	12:30:00	2015-09-13 12:30:00	26.646	26.451	26.5485	26.549		26.549
2015-09-13	12:45:00	2015-09-13 12:45:00	26.598	26.378	26.488	26.5		26.5
2015-09-13	13:00:00	2015-09-13 13:00:00	26.598	26.378	26.488	26.524		26.524
2015-09-13	13:15:00	2015-09-13 13:15:00	26.598	26.402	26.5	26.549		26.549
2015-09-13	13:30:00	2015-09-13 13:30:00	26.598	26.378	26.488	26.524		26.524
2015-09-13	13:45:00	2015-09-13 13:45:00	26.573	26.378	26.4755	26.524		26.524
2015-09-13	14:00:00	2015-09-13 14:00:00	26.573	26.378	26.4755	26.5		26.5
2015-09-13	14:15:00	2015-09-13 14:15:00	26.598	26.378	26.488	26.524		26.524
2015-09-13	14:30:00	2015-09-13 14:30:00	26.598	26.378	26.488	26.524		26.524
2015-09-13	14:45:00	2015-09-13 14:45:00	26.598	26.402	26.5	26.549		26.549
2015-09-13	15:00:00	2015-09-13 15:00:00	26.622	26.426	26.524	26.549		26.549
2015-09-13	15:15:00	2015-09-13 15:15:00	26.646	26.426	26.536	26.573		26.573
2015-09-13	15:30:00	2015-09-13 15:30:00	26.671	26.451	26.561	26.573		26.573
2015-09-13	15:45:00	2015-09-13 15:45:00	26.695	26.475	26.585	26.598		26.598
2015-09-13	16:00:00	2015-09-13 16:00:00	26.744	26.524	26.634	26.598		26.598
2015-09-13	16:15:00	2015-09-13 16:15:00	26.769	26.549	26.659	26.622		26.622
2015-09-13	16:30:00	2015-09-13 16:30:00	26.769	26.549	26.659	26.646		26.646
2015-09-13	16:45:00	2015-09-13 16:45:00	26.769	26.549	26.659	26.671		26.671
2015-09-13	17:00:00	2015-09-13 17:00:00	26.793	26.573	26.683	26.744		26.744
2015-09-13	17:15:00	2015-09-13 17:15:00	26.793	26.549	26.671	26.695		26.695
2015-09-13	17:30:00	2015-09-13 17:30:00	26.72	26.5	26.61	26.646		26.646
2015-09-13	17:45:00	2015-09-13 17:45:00	26.671	26.451	26.561	26.622		26.622
2015-09-13	18:00:00	2015-09-13 18:00:00	26.598	26.378	26.488	26.598		26.598
2015-09-13	18:15:00	2015-09-13 18:15:00	26.5	26.28	26.39	26.5		26.5
2015-09-13	18:30:00	2015-09-13 18:30:00	26.378	26.134	26.256	26.402		26.402
2015-09-13	18:45:00	2015-09-13 18:45:00	26.182	26.012	26.097	26.378		26.378
2015-09-13	19:00:00	2015-09-13 19:00:00	26.036	25.866	25.951	26.402		26.402
2015-09-13	19:15:00	2015-09-13 19:15:00	25.841	25.744	25.7925	26.329		26.329
2015-09-13	19:30:00	2015-09-13 19:30:00	25.671	25.598	25.6345	26.231		26.231
2015-09-13	19:45:00	2015-09-13 19:45:00	25.55	25.525	25.5375	26.158		26.158
2015-09-13	20:00:00	2015-09-13 20:00:00	25.38	25.38	25.38	26.109		26.109
2015-09-13	20:15:00	2015-09-13 20:15:00	25.21	25.186	25.198	26.085		26.085
2015-09-13	20:30:00	2015-09-13 20:30:00	25.04	25.016	25.028	26.085		26.085
2015-09-13	20:45:00	2015-09-13 20:45:00	24.919	24.895	24.907	26.061		26.061
2015-09-13	21:00:00	2015-09-13 21:00:00	25.404	25.21	25.307	26.012		26.012
2015-09-13	21:15:00	2015-09-13 21:15:00	25.744	25.574	25.659	25.987		25.987
2015-09-13	21:30:00	2015-09-13 21:30:00	25.914	25.137	25.5255	25.841		25.841
2015-09-13	21:45:00	2015-09-13 21:45:00	25.501	25.21	25.3555	25.574		25.574
2015-09-13	22:00:00	2015-09-13 22:00:00	26.158	26.012	26.085	25.598		25.598
2015-09-13	22:15:00	2015-09-13 22:15:00	26.426	26.231	26.3285	25.623		25.623
2015-09-13	22:30:00	2015-09-13 22:30:00	26.549	26.304	26.4265	25.647		25.647
2015-09-13	22:45:00	2015-09-13 22:45:00	26.353	26.134	26.2435	25.939		25.939
2015-09-13	23:00:00	2015-09-13 23:00:00	26.402	26.158	26.28	26.158		26.158
2015-09-13	23:15:00	2015-09-13 23:15:00	26.182	25.963	26.0725	25.939		25.939
2015-09-13	23:30:00	2015-09-13 23:30:00	26.304	26.085	26.1945	25.841		25.841
2015-09-13	23:45:00	2015-09-13 23:45:00	26.451	26.256	26.3535	26.182		26.182
2015-09-14	00:00:00	2015-09-14	26.524	26.304	26.414	26.426		26.426
2015-09-14	00:15:00	2015-09-14 00:15:00	26.622	26.402	26.512	26.524		26.524
2015-09-14	00:30:00	2015-09-14 00:30:00	26.671	26.451	26.561	26.598		26.598
2015-09-14	00:45:00	2015-09-14 00:45:00	26.549	26.304	26.4265	26.475		26.475
2015-09-14	01:00:00	2015-09-14 01:00:00	26.573	26.329	26.451	26.5		26.5
2015-09-14	01:15:00	2015-09-14 01:15:00	26.524	26.304	26.414	26.475		26.475
2015-09-14	01:30:00	2015-09-14 01:30:00	26.598	26.378	26.488	26.524		26.524
2015-09-14	01:45:00	2015-09-14 01:45:00	26.598	26.378	26.488	26.524		26.524
2015-09-14	02:00:00	2015-09-14 02:00:00	26.573	26.353	26.463	26.5		26.5
2015-09-14	02:15:00	2015-09-14 02:15:00	26.549	26.329	26.439	26.475		26.475
2015-09-14	02:30:00	2015-09-14 02:30:00	26.549	26.329	26.439	26.5		26.5
2015-09-14	02:45:00	2015-09-14 02:45:00	26.549	26.329	26.439	26.475		26.475
2015-09-14	03:00:00	2015-09-14 03:00:00	26.549	26.329	26.439	26.475		26.475
2015-09-14	03:15:00	2015-09-14 03:15:00	26.549	26.329	26.439	26.475		26.475
2015-09-14	03:30:00	2015-09-14 03:30:00	26.524	26.304	26.414	26.475		26.475
2015-09-14	03:45:00	2015-09-14 03:45:00	26.475	26.256	26.3655	26.426		26.426
2015-09-14	04:00:00	2015-09-14 04:00:00	26.475	26.256	26.3655	26.402		26.402
2015-09-14	04:15:00	2015-09-14 04:15:00	26.475	26.256	26.3655	26.402		26.402
2015-09-14	04:30:00	2015-09-14 04:30:00	26.475	26.256	26.3655	26.402		26.402
2015-09-14	04:45:00	2015-09-14 04:45:00	26.475	26.231	26.353	26.402		26.402
2015-09-14	05:00:00	2015-09-14 05:00:00	26.475	26.256	26.3655	26.426		26.426
2015-09-14	05:15:00	2015-09-14 05:15:00	26.5	26.256	26.378	26.426		26.426
2015-09-14	05:30:00	2015-09-14 05:30:00	26.475	26.256	26.3655	26.426		26.426
2015-09-14	05:45:00	2015-09-14 05:45:00	26.451	26.231	26.341	26.402		26.402
2015-09-14	06:00:00	2015-09-14 06:00:00	26.304	26.061	26.1825	26.402		26.402
2015-09-14	06:15:00	2015-09-14 06:15:00	26.329	26.061	26.195	26.378		26.378
2015-09-14	06:30:00	2015-09-14 06:30:00	26.28	26.085	26.1825	26.378		26.378
2015-09-14	06:45:00	2015-09-14 06:45:00	26.28	26.134	26.207	26.378		26.378
2015-09-14	07:00:00	2015-09-14 07:00:00	26.304	26.256	26.28	26.304		26.304
2015-09-14	07:15:00	2015-09-14 07:15:00	26.329	26.304	26.3165	26.207		26.207
2015-09-14	07:30:00	2015-09-14 07:30:00	26.402	26.378	26.39	26.207		26.207
2015-09-14	07:45:00	2015-09-14 07:45:00	26.549	26.549	26.549	26.182		26.182
2015-09-14	08:00:00	2015-09-14 08:00:00	26.744	26.695	26.7195	26.304		26.304
2015-09-14	08:15:00	2015-09-14 08:15:00	26.94	26.989	26.9645	26.451		26.451
2015-09-14	08:30:00	2015-09-14 08:30:00	27.235	27.358	27.2965	26.573		26.573
2015-09-14	08:45:00	2015-09-14 08:45:00	27.554	27.604	27.579	26.744		26.744
2015-09-14	09:00:00	2015-09-14 09:00:00	27.604	27.407	27.5055	26.916		26.916
2015-09-14	09:15:00	2015-09-14 09:15:00	27.259	27.087	27.173	27.014		27.014
2015-09-14	09:30:00	2015-09-14 09:30:00	27.136	27.112	27.124	27.063		27.063
2015-09-14	09:45:00	2015-09-14 09:45:00	27.186	27.136	27.161	27.136		27.136
2015-09-14	10:00:00	2015-09-14 10:00:00	27.186	27.014	27.1	27.136		27.136
2015-09-14	10:15:00	2015-09-14 10:15:00	26.989	26.793	26.891	27.161		27.161
2015-09-14	10:30:00	2015-09-14 10:30:00	26.891	26.744	26.8175	27.112		27.112
2015-09-14	10:45:00	2015-09-14 10:45:00	26.94	26.744	26.842	27.087		27.087
2015-09-14	11:00:00	2015-09-14 11:00:00	26.867	26.646	26.7565	26.989		26.989
2015-09-14	11:15:00	2015-09-14 11:15:00	26.94	26.744	26.842	27.014		27.014
2015-09-14	11:30:00	2015-09-14 11:30:00	27.136	27.038	27.087	26.916		26.916
2015-09-14	11:45:00	2015-09-14 11:45:00	27.186	27.063	27.1245	26.891		26.891
2015-09-14	12:00:00	2015-09-14 12:00:00	26.94	26.744	26.842	26.744		26.744
2015-09-14	12:15:00	2015-09-14 12:15:00	26.793	26.598	26.6955	26.695		26.695
2015-09-14	12:30:00	2015-09-14 12:30:00	26.695	26.5	26.5975	26.646		26.646
2015-09-14	12:45:00	2015-09-14 12:45:00	26.671	26.451	26.561	26.549		26.549
2015-09-14	13:00:00	2015-09-14 13:00:00	26.671	26.475	26.573	26.549		26.549
2015-09-14	13:15:00	2015-09-14 13:15:00	26.573	26.378	26.4755	26.524		26.524
2015-09-14	13:30:00	2015-09-14 13:30:00	26.598	26.402	26.5	26.524		26.524
2015-09-14	13:45:00	2015-09-14 13:45:00	26.598	26.402	26.5	26.524		26.524
2015-09-14	14:00:00	2015-09-14 14:00:00	26.622	26.402	26.512	26.549		26.549
2015-09-14	14:15:00	2015-09-14 14:15:00	26.598	26.378	26.488	26.524		26.524
2015-09-14	14:30:00	2015-09-14 14:30:00	26.598	26.378	26.488	26.524		26.524
2015-09-14	14:45:00	2015-09-14 14:45:00	26.598	26.378	26.488	26.5		26.5
2015-09-14	15:00:00	2015-09-14 15:00:00	26.598	26.402	26.5	26.524		26.524
2015-09-14	15:15:00	2015-09-14 15:15:00	26.622	26.426	26.524	26.549		26.549
2015-09-14	15:30:00	2015-09-14 15:30:00	26.646	26.426	26.536	26.573		26.573
2015-09-14	15:45:00	2015-09-14 15:45:00	26.646	26.451	26.5485	26.573		26.573
2015-09-14	16:00:00	2015-09-14 16:00:00	26.695	26.475	26.585	26.573		26.573
2015-09-14	16:15:00	2015-09-14 16:15:00	26.695	26.5	26.5975	26.573		26.573
2015-09-14	16:30:00	2015-09-14 16:30:00	26.744	26.524	26.634	26.598		26.598
2015-09-14	16:45:00	2015-09-14 16:45:00	26.793	26.573	26.683	26.622		26.622
2015-09-14	17:00:00	2015-09-14 17:00:00	26.818	26.598	26.708	26.646		26.646
2015-09-14	17:15:00	2015-09-14 17:15:00	26.842	26.622	26.732	26.72		26.72
2015-09-14	17:30:00	2015-09-14 17:30:00	26.818	26.598	26.708	26.744		26.744
2015-09-14	17:45:00	2015-09-14 17:45:00	26.793	26.573	26.683	26.72		26.72
2015-09-14	18:00:00	2015-09-14 18:00:00	26.769	26.549	26.659	26.671		26.671
2015-09-14	18:15:00	2015-09-14 18:15:00	26.695	26.5	26.5975	26.646		26.646
2015-09-14	18:30:00	2015-09-14 18:30:00	26.573	26.378	26.4755	26.646		26.646
2015-09-14	18:45:00	2015-09-14 18:45:00	26.524	26.304	26.414	26.598		26.598
2015-09-14	19:00:00	2015-09-14 19:00:00	26.378	26.182	26.28	26.549		26.549
2015-09-14	19:15:00	2015-09-14 19:15:00	26.207	26.012	26.1095	26.524		26.524
2015-09-14	19:30:00	2015-09-14 19:30:00	26.085	25.89	25.9875	26.426		26.426
2015-09-14	19:45:00	2015-09-14 19:45:00	25.914	25.817	25.8655	26.353		26.353
2015-09-14	20:00:00	2015-09-14 20:00:00	25.768	25.72	25.744	26.256		26.256
2015-09-14	20:15:00	2015-09-14 20:15:00	25.744	25.598	25.671	26.231		26.231
2015-09-14	20:30:00	2015-09-14 20:30:00	25.501	25.477	25.489	26.158		26.158
2015-09-14	20:45:00	2015-09-14 20:45:00	25.258	25.283	25.2705	26.158		26.158
2015-09-14	21:00:00	2015-09-14 21:00:00	25.04	25.137	25.0885	26.109		26.109
2015-09-14	21:15:00	2015-09-14 21:15:00	24.944	24.944	24.944	26.036		26.036
2015-09-14	21:30:00	2015-09-14 21:30:00	25.525	25.428	25.4765	26.036		26.036
2015-09-14	21:45:00	2015-09-14 21:45:00	25.987	25.817	25.902	25.939		25.939
2015-09-14	22:00:00	2015-09-14 22:00:00	25.841	25.258	25.5495	25.72		25.72
2015-09-14	22:15:00	2015-09-14 22:15:00	25.793	25.647	25.72	25.671		25.671
2015-09-14	22:30:00	2015-09-14 22:30:00	26.28	26.085	26.1825	25.671		25.671
2015-09-14	22:45:00	2015-09-14 22:45:00	26.5	26.304	26.402	25.695		25.695
2015-09-14	23:00:00	2015-09-14 23:00:00	26.402	26.158	26.28	26.134		26.134
2015-09-14	23:15:00	2015-09-14 23:15:00	26.426	26.207	26.3165	26.304		26.304
2015-09-14	23:30:00	2015-09-14 23:30:00	26.378	26.158	26.268	26.304		26.304
2015-09-14	23:45:00	2015-09-14 23:45:00	26.231	26.012	26.1215	26.304		26.304
2015-09-15	00:00:00	2015-09-15	26.353	26.158	26.2555	26.304		26.304
2015-09-15	00:15:00	2015-09-15 00:15:00	26.549	26.329	26.439	26.475		26.475
2015-09-15	00:30:00	2015-09-15 00:30:00	26.622	26.402	26.512	26.549		26.549
2015-09-15	00:45:00	2015-09-15 00:45:00	26.671	26.451	26.561	26.573		26.573
2015-09-15	01:00:00	2015-09-15 01:00:00	26.524	26.304	26.414	26.426		26.426
2015-09-15	01:15:00	2015-09-15 01:15:00	26.524	26.304	26.414	26.426		26.426
2015-09-15	01:30:00	2015-09-15 01:30:00	26.5	26.28	26.39	26.451		26.451
2015-09-15	01:45:00	2015-09-15 01:45:00	26.5	26.28	26.39	26.426		26.426
2015-09-15	02:00:00	2015-09-15 02:00:00	26.549	26.329	26.439	26.475		26.475
2015-09-15	02:15:00	2015-09-15 02:15:00	26.573	26.353	26.463	26.5		26.5
2015-09-15	02:30:00	2015-09-15 02:30:00	26.598	26.378	26.488	26.524		26.524
2015-09-15	02:45:00	2015-09-15 02:45:00	26.598	26.378	26.488	26.524		26.524
2015-09-15	03:00:00	2015-09-15 03:00:00	26.598	26.378	26.488	26.524		26.524
2015-09-15	03:15:00	2015-09-15 03:15:00	26.598	26.353	26.4755	26.5		26.5
2015-09-15	03:30:00	2015-09-15 03:30:00	26.573	26.353	26.463	26.5		26.5
2015-09-15	03:45:00	2015-09-15 03:45:00	26.549	26.329	26.439	26.5		26.5
2015-09-15	04:00:00	2015-09-15 04:00:00	26.524	26.304	26.414	26.451		26.451
2015-09-15	04:15:00	2015-09-15 04:15:00	26.524	26.28	26.402	26.451		26.451
2015-09-15	04:30:00	2015-09-15 04:30:00	26.5	26.28	26.39	26.451		26.451
2015-09-15	04:45:00	2015-09-15 04:45:00	26.475	26.256	26.3655	26.426		26.426
2015-09-15	05:00:00	2015-09-15 05:00:00	26.475	26.256	26.3655	26.402		26.402
2015-09-15	05:15:00	2015-09-15 05:15:00	26.451	26.231	26.341	26.402		26.402
2015-09-15	05:30:00	2015-09-15 05:30:00	26.475	26.256	26.3655	26.402		26.402
2015-09-15	05:45:00	2015-09-15 05:45:00	26.475	26.256	26.3655	26.402		26.402
2015-09-15	06:00:00	2015-09-15 06:00:00	26.451	26.231	26.341	26.402		26.402
2015-09-15	06:15:00	2015-09-15 06:15:00	26.402	26.182	26.292	26.378		26.378
2015-09-15	06:30:00	2015-09-15 06:30:00	26.304	26.036	26.17	26.353		26.353
2015-09-15	06:45:00	2015-09-15 06:45:00	26.256	26.085	26.1705	26.353		26.353
2015-09-15	07:00:00	2015-09-15 07:00:00	26.256	26.182	26.219	26.353		26.353
2015-09-15	07:15:00	2015-09-15 07:15:00	26.28	26.353	26.3165	26.402		26.402
2015-09-15	07:30:00	2015-09-15 07:30:00	26.378	26.549	26.4635	26.329		26.329
2015-09-15	07:45:00	2015-09-15 07:45:00	26.5	26.744	26.622	26.402		26.402
2015-09-15	08:00:00	2015-09-15 08:00:00	26.622	26.989	26.8055	26.5		26.5
2015-09-15	08:15:00	2015-09-15 08:15:00	26.818	27.186	27.002	26.573		26.573
2015-09-15	08:30:00	2015-09-15 08:30:00	27.087	27.481	27.284	26.646		26.646
2015-09-15	08:45:00	2015-09-15 08:45:00	27.382	27.702	27.542	26.793		26.793
2015-09-15	09:00:00	2015-09-15 09:00:00	27.702	28.072	27.887	26.916		26.916
2015-09-15	09:15:00	2015-09-15 09:15:00	28.048	28.444	28.246	27.014		27.014
2015-09-15	09:30:00	2015-09-15 09:30:00	28.394	28.32	28.357	27.038		27.038
2015-09-15	09:45:00	2015-09-15 09:45:00	27.53	27.358	27.444	27.136		27.136
2015-09-15	10:00:00	2015-09-15 10:00:00	27.284	27.333	27.3085	27.186		27.186
2015-09-15	10:15:00	2015-09-15 10:15:00	27.358	27.308	27.333	27.284		27.284
2015-09-15	10:30:00	2015-09-15 10:30:00	27.333	27.136	27.2345	27.259		27.259
2015-09-15	10:45:00	2015-09-15 10:45:00	27.136	26.965	27.0505	27.235		27.235
2015-09-15	11:00:00	2015-09-15 11:00:00	27.112	26.916	27.014	27.284		27.284
2015-09-15	11:15:00	2015-09-15 11:15:00	27.161	26.989	27.075	27.235		27.235
2015-09-15	11:30:00	2015-09-15 11:30:00	26.989	26.793	26.891	27.136		27.136
2015-09-15	11:45:00	2015-09-15 11:45:00	27.136	27.038	27.087	27.063		27.063
2015-09-15	12:00:00	2015-09-15 12:00:00	27.284	27.112	27.198	27.038		27.038
2015-09-15	12:15:00	2015-09-15 12:15:00	27.284	27.112	27.198	27.038		27.038
2015-09-15	12:30:00	2015-09-15 12:30:00	27.014	26.818	26.916	26.695		26.695
2015-09-15	12:45:00	2015-09-15 12:45:00	26.695	26.524	26.6095	26.549		26.549
2015-09-15	13:00:00	2015-09-15 13:00:00	26.646	26.451	26.5485	26.573		26.573
2015-09-15	13:15:00	2015-09-15 13:15:00	26.598	26.402	26.5	26.5		26.5
2015-09-15	13:30:00	2015-09-15 13:30:00	26.549	26.353	26.451	26.475		26.475
2015-09-15	13:45:00	2015-09-15 13:45:00	26.549	26.353	26.451	26.5		26.5
2015-09-15	14:00:00	2015-09-15 14:00:00	26.573	26.353	26.463	26.5		26.5
2015-09-15	14:15:00	2015-09-15 14:15:00	26.573	26.353	26.463	26.5		26.5
2015-09-15	14:30:00	2015-09-15 14:30:00	26.549	26.329	26.439	26.475		26.475
2015-09-15	14:45:00	2015-09-15 14:45:00	26.549	26.329	26.439	26.451		26.451
2015-09-15	15:00:00	2015-09-15 15:00:00	26.549	26.329	26.439	26.475		26.475
2015-09-15	15:15:00	2015-09-15 15:15:00	26.549	26.353	26.451	26.475		26.475
2015-09-15	15:30:00	2015-09-15 15:30:00	26.573	26.353	26.463	26.5		26.5
2015-09-15	15:45:00	2015-09-15 15:45:00	26.598	26.402	26.5	26.524		26.524
2015-09-15	16:00:00	2015-09-15 16:00:00	26.622	26.402	26.512	26.549		26.549
2015-09-15	16:15:00	2015-09-15 16:15:00	26.622	26.402	26.512	26.549		26.549
2015-09-15	16:30:00	2015-09-15 16:30:00	26.622	26.402	26.512	26.549		26.549
2015-09-15	16:45:00	2015-09-15 16:45:00	26.646	26.426	26.536	26.549		26.549
2015-09-15	17:00:00	2015-09-15 17:00:00	26.646	26.426	26.536	26.549		26.549
2015-09-15	17:15:00	2015-09-15 17:15:00	26.744	26.549	26.6465	26.573		26.573
2015-09-15	17:30:00	2015-09-15 17:30:00	26.769	26.549	26.659	26.573		26.573
2015-09-15	17:45:00	2015-09-15 17:45:00	26.793	26.549	26.671	26.646		26.646
2015-09-15	18:00:00	2015-09-15 18:00:00	26.744	26.524	26.634	26.671		26.671
2015-09-15	18:15:00	2015-09-15 18:15:00	26.72	26.5	26.61	26.646		26.646
2015-09-15	18:30:00	2015-09-15 18:30:00	26.646	26.402	26.524	26.622		26.622
2015-09-15	18:45:00	2015-09-15 18:45:00	26.573	26.329	26.451	26.598		26.598
2015-09-15	19:00:00	2015-09-15 19:00:00	26.451	26.207	26.329	26.549		26.549
2015-09-15	19:15:00	2015-09-15 19:15:00	26.378	26.158	26.268	26.524		26.524
2015-09-15	19:30:00	2015-09-15 19:30:00	26.28	26.061	26.1705	26.402		26.402
2015-09-15	19:45:00	2015-09-15 19:45:00	26.134	25.939	26.0365	26.353		26.353
2015-09-15	20:00:00	2015-09-15 20:00:00	25.987	25.841	25.914	26.329		26.329
2015-09-15	20:15:00	2015-09-15 20:15:00	25.89	25.744	25.817	26.256		26.256
2015-09-15	20:30:00	2015-09-15 20:30:00	25.744	25.623	25.6835	26.182		26.182
2015-09-15	20:45:00	2015-09-15 20:45:00	25.598	25.477	25.5375	26.109		26.109
2015-09-15	21:00:00	2015-09-15 21:00:00	25.453	25.355	25.404	26.085		26.085
2015-09-15	21:15:00	2015-09-15 21:15:00	25.307	25.186	25.2465	26.109		26.109
2015-09-15	21:30:00	2015-09-15 21:30:00	25.162	25.04	25.101	26.109		26.109
2015-09-15	21:45:00	2015-09-15 21:45:00	25.162	25.04	25.101	26.134		26.134
2015-09-15	22:00:00	2015-09-15 22:00:00	25.72	25.574	25.647	26.061		26.061
2015-09-15	22:15:00	2015-09-15 22:15:00	26.061	25.695	25.878	25.841		25.841
2015-09-15	22:30:00	2015-09-15 22:30:00	25.574	25.258	25.416	25.623		25.623
2015-09-15	22:45:00	2015-09-15 22:45:00	26.061	25.963	26.012	25.744		25.744
2015-09-15	23:00:00	2015-09-15 23:00:00	26.451	26.231	26.341	25.817		25.817
2015-09-15	23:15:00	2015-09-15 23:15:00	26.5	26.256	26.378	25.914		25.914
2015-09-15	23:30:00	2015-09-15 23:30:00	26.353	26.158	26.2555	26.256		26.256
2015-09-15	23:45:00	2015-09-15 23:45:00	26.353	26.109	26.231	26.28		26.28
2015-09-16	00:00:00	2015-09-16	26.182	25.939	26.0605	26.158		26.158
2015-09-16	00:15:00	2015-09-16 00:15:00	26.158	25.963	26.0605	26.061		26.061
2015-09-16	00:30:00	2015-09-16 00:30:00	26.402	26.158	26.28	26.28		26.28
2015-09-16	00:45:00	2015-09-16 00:45:00	26.573	26.353	26.463	26.524		26.524
2015-09-16	01:00:00	2015-09-16 01:00:00	26.671	26.426	26.5485	26.598		26.598
2015-09-16	01:15:00	2015-09-16 01:15:00	26.671	26.451	26.561	26.573		26.573
2015-09-16	01:30:00	2015-09-16 01:30:00	26.573	26.329	26.451	26.475		26.475
2015-09-16	01:45:00	2015-09-16 01:45:00	26.549	26.304	26.4265	26.451		26.451
2015-09-16	02:00:00	2015-09-16 02:00:00	26.5	26.28	26.39	26.426		26.426
2015-09-16	02:15:00	2015-09-16 02:15:00	26.524	26.304	26.414	26.451		26.451
2015-09-16	02:30:00	2015-09-16 02:30:00	26.524	26.304	26.414	26.451		26.451
2015-09-16	02:45:00	2015-09-16 02:45:00	26.549	26.329	26.439	26.475		26.475
2015-09-16	03:00:00	2015-09-16 03:00:00	26.573	26.353	26.463	26.5		26.5
2015-09-16	03:15:00	2015-09-16 03:15:00	26.573	26.329	26.451	26.451		26.451
2015-09-16	03:30:00	2015-09-16 03:30:00	26.524	26.304	26.414	26.451		26.451
2015-09-16	03:45:00	2015-09-16 03:45:00	26.524	26.28	26.402	26.426		26.426
2015-09-16	04:00:00	2015-09-16 04:00:00	26.524	26.28	26.402	26.426		26.426
2015-09-16	04:15:00	2015-09-16 04:15:00	26.524	26.28	26.402	26.426		26.426
2015-09-16	04:30:00	2015-09-16 04:30:00	26.5	26.28	26.39	26.426		26.426
2015-09-16	04:45:00	2015-09-16 04:45:00	26.5	26.256	26.378	26.426		26.426
2015-09-16	05:00:00	2015-09-16 05:00:00	26.475	26.256	26.3655	26.402		26.402
2015-09-16	05:15:00	2015-09-16 05:15:00	26.451	26.231	26.341	26.378		26.378
2015-09-16	05:30:00	2015-09-16 05:30:00	26.402	26.182	26.292	26.353		26.353
2015-09-16	05:45:00	2015-09-16 05:45:00	26.426	26.207	26.3165	26.353		26.353
2015-09-16	06:00:00	2015-09-16 06:00:00	26.426	26.207	26.3165	26.353		26.353
2015-09-16	06:15:00	2015-09-16 06:15:00	26.426	26.207	26.3165	26.378		26.378
2015-09-16	06:30:00	2015-09-16 06:30:00	26.402	26.207	26.3045	26.378		26.378
2015-09-16	06:45:00	2015-09-16 06:45:00	26.378	26.182	26.28	26.402		26.402
2015-09-16	07:00:00	2015-09-16 07:00:00	26.28	26.158	26.219	26.378		26.378
2015-09-16	07:15:00	2015-09-16 07:15:00	26.329	26.256	26.2925	26.402		26.402
2015-09-16	07:30:00	2015-09-16 07:30:00	26.304	26.109	26.2065	26.402		26.402
2015-09-16	07:45:00	2015-09-16 07:45:00	26.304	26.451	26.3775	26.402		26.402
2015-09-16	08:00:00	2015-09-16 08:00:00	26.329	26.524	26.4265	26.353		26.353
2015-09-16	08:15:00	2015-09-16 08:15:00	26.231	26.304	26.2675	26.353		26.353
2015-09-16	08:30:00	2015-09-16 08:30:00	26.109	26.304	26.2065	26.451		26.451
2015-09-16	08:45:00	2015-09-16 08:45:00	26.28	26.549	26.4145	26.475		26.475
2015-09-16	09:00:00	2015-09-16 09:00:00	26.451	26.646	26.5485	26.573		26.573
2015-09-16	09:15:00	2015-09-16 09:15:00	26.549	26.867	26.708	26.598		26.598
2015-09-16	09:30:00	2015-09-16 09:30:00	26.72	27.038	26.879	26.598		26.598
2015-09-16	09:45:00	2015-09-16 09:45:00	27.087	27.333	27.21	26.695		26.695
2015-09-16	10:00:00	2015-09-16 10:00:00	27.358	27.53	27.444	26.744		26.744
2015-09-16	10:15:00	2015-09-16 10:15:00	27.136	26.965	27.0505	26.818		26.818
2015-09-16	10:30:00	2015-09-16 10:30:00	26.989	26.916	26.9525	26.867		26.867
2015-09-16	10:45:00	2015-09-16 10:45:00	26.989	26.891	26.94	26.867		26.867
2015-09-16	11:00:00	2015-09-16 11:00:00	27.014	26.842	26.928	26.867		26.867
2015-09-16	11:15:00	2015-09-16 11:15:00	27.014	26.842	26.928	26.793		26.793
2015-09-16	11:30:00	2015-09-16 11:30:00	27.014	26.793	26.9035	26.842		26.842
2015-09-16	11:45:00	2015-09-16 11:45:00	26.818	26.598	26.708	26.916		26.916
2015-09-16	12:00:00	2015-09-16 12:00:00	26.793	26.598	26.6955	26.769		26.769
2015-09-16	12:15:00	2015-09-16 12:15:00	26.842	26.646	26.744	26.769		26.769
2015-09-16	12:30:00	2015-09-16 12:30:00	26.916	26.72	26.818	26.793		26.793
2015-09-16	12:45:00	2015-09-16 12:45:00	26.94	26.769	26.8545	26.793		26.793
2015-09-16	13:00:00	2015-09-16 13:00:00	26.842	26.646	26.744	26.744		26.744
2015-09-16	13:15:00	2015-09-16 13:15:00	26.744	26.549	26.6465	26.598		26.598
2015-09-16	13:30:00	2015-09-16 13:30:00	26.622	26.426	26.524	26.573		26.573
2015-09-16	13:45:00	2015-09-16 13:45:00	26.549	26.353	26.451	26.451		26.451
2015-09-16	14:00:00	2015-09-16 14:00:00	26.5	26.304	26.402	26.451		26.451
2015-09-16	14:15:00	2015-09-16 14:15:00	26.524	26.304	26.414	26.451		26.451
2015-09-16	14:30:00	2015-09-16 14:30:00	26.549	26.329	26.439	26.475		26.475
2015-09-16	14:45:00	2015-09-16 14:45:00	26.549	26.329	26.439	26.451		26.451
2015-09-16	15:00:00	2015-09-16 15:00:00	26.524	26.304	26.414	26.451		26.451
2015-09-16	15:15:00	2015-09-16 15:15:00	26.5	26.28	26.39	26.426		26.426
2015-09-16	15:30:00	2015-09-16 15:30:00	26.5	26.28	26.39	26.426		26.426
2015-09-16	15:45:00	2015-09-16 15:45:00	26.549	26.329	26.439	26.451		26.451
2015-09-16	16:00:00	2015-09-16 16:00:00	26.549	26.353	26.451	26.475		26.475
2015-09-16	16:15:00	2015-09-16 16:15:00	26.598	26.378	26.488	26.5		26.5
2015-09-16	16:30:00	2015-09-16 16:30:00	26.598	26.378	26.488	26.5		26.5
2015-09-16	16:45:00	2015-09-16 16:45:00	26.598	26.378	26.488	26.524		26.524
2015-09-16	17:00:00	2015-09-16 17:00:00	26.622	26.402	26.512	26.549		26.549
2015-09-16	17:15:00	2015-09-16 17:15:00	26.622	26.402	26.512	26.549		26.549
2015-09-16	17:30:00	2015-09-16 17:30:00	26.646	26.426	26.536	26.549		26.549
2015-09-16	17:45:00	2015-09-16 17:45:00	26.646	26.426	26.536	26.573		26.573
2015-09-16	18:00:00	2015-09-16 18:00:00	26.671	26.451	26.561	26.598		26.598
2015-09-16	18:15:00	2015-09-16 18:15:00	26.671	26.451	26.561	26.598		26.598
2015-09-16	18:30:00	2015-09-16 18:30:00	26.671	26.426	26.5485	26.622		26.622
2015-09-16	18:45:00	2015-09-16 18:45:00	26.646	26.426	26.536	26.622		26.622
2015-09-16	19:00:00	2015-09-16 19:00:00	26.598	26.378	26.488	26.598		26.598
2015-09-16	19:15:00	2015-09-16 19:15:00	26.5	26.28	26.39	26.573		26.573
2015-09-16	19:30:00	2015-09-16 19:30:00	26.402	26.182	26.292	26.524		26.524
2015-09-16	19:45:00	2015-09-16 19:45:00	26.329	26.085	26.207	26.402		26.402
2015-09-16	20:00:00	2015-09-16 20:00:00	26.207	25.963	26.085	26.158		26.158
2015-09-16	20:15:00	2015-09-16 20:15:00	26.085	25.866	25.9755	26.134		26.134
2015-09-16	20:30:00	2015-09-16 20:30:00	25.914	25.768	25.841	26.134		26.134
2015-09-16	20:45:00	2015-09-16 20:45:00	25.841	25.72	25.7805	26.085		26.085
2015-09-16	21:00:00	2015-09-16 21:00:00	25.744	25.647	25.6955	26.036		26.036
2015-09-16	21:15:00	2015-09-16 21:15:00	25.647	25.525	25.586	26.036		26.036
2015-09-16	21:30:00	2015-09-16 21:30:00	25.55	25.404	25.477	26.036		26.036
2015-09-16	21:45:00	2015-09-16 21:45:00	25.38	25.283	25.3315	26.012		26.012
2015-09-16	22:00:00	2015-09-16 22:00:00	25.21	25.186	25.198	25.963		25.963
2015-09-16	22:15:00	2015-09-16 22:15:00	25.598	25.428	25.513	25.987		25.987
2015-09-16	22:30:00	2015-09-16 22:30:00	25.939	25.744	25.8415	25.963		25.963
2015-09-16	22:45:00	2015-09-16 22:45:00	26.061	25.477	25.769	25.768		25.768
2015-09-16	23:00:00	2015-09-16 23:00:00	25.841	25.671	25.756	25.793		25.793
2015-09-16	23:15:00	2015-09-16 23:15:00	26.353	26.182	26.2675	25.841		25.841
2015-09-16	23:30:00	2015-09-16 23:30:00	26.549	26.329	26.439	25.89		25.89
2015-09-16	23:45:00	2015-09-16 23:45:00	26.402	26.182	26.292	26.036		26.036
2015-09-17	00:00:00	2015-09-17	26.402	26.182	26.292	26.304		26.304
2015-09-17	00:15:00	2015-09-17 00:15:00	26.378	26.158	26.268	26.329		26.329
2015-09-17	00:30:00	2015-09-17 00:30:00	26.28	26.061	26.1705	26.304		26.304
2015-09-17	00:45:00	2015-09-17 00:45:00	26.28	26.061	26.1705	26.353		26.353
2015-09-17	01:00:00	2015-09-17 01:00:00	26.475	26.256	26.3655	26.402		26.402
2015-09-17	01:15:00	2015-09-17 01:15:00	26.622	26.378	26.5	26.524		26.524
2015-09-17	01:30:00	2015-09-17 01:30:00	26.646	26.426	26.536	26.573		26.573
2015-09-17	01:45:00	2015-09-17 01:45:00	26.524	26.28	26.402	26.402		26.402
2015-09-17	02:00:00	2015-09-17 02:00:00	26.475	26.231	26.353	26.402		26.402
2015-09-17	02:15:00	2015-09-17 02:15:00	26.475	26.256	26.3655	26.402		26.402
2015-09-17	02:30:00	2015-09-17 02:30:00	26.5	26.256	26.378	26.402		26.402
2015-09-17	02:45:00	2015-09-17 02:45:00	26.475	26.256	26.3655	26.378		26.378
2015-09-17	03:00:00	2015-09-17 03:00:00	26.475	26.256	26.3655	26.402		26.402
2015-09-17	03:15:00	2015-09-17 03:15:00	26.451	26.231	26.341	26.378		26.378
2015-09-17	03:30:00	2015-09-17 03:30:00	26.451	26.207	26.329	26.353		26.353
2015-09-17	03:45:00	2015-09-17 03:45:00	26.426	26.207	26.3165	26.353		26.353
2015-09-17	04:00:00	2015-09-17 04:00:00	26.426	26.207	26.3165	26.353		26.353
2015-09-17	04:15:00	2015-09-17 04:15:00	26.426	26.207	26.3165	26.353		26.353
2015-09-17	04:30:00	2015-09-17 04:30:00	26.426	26.207	26.3165	26.353		26.353
2015-09-17	04:45:00	2015-09-17 04:45:00	26.426	26.207	26.3165	26.353		26.353
2015-09-17	05:00:00	2015-09-17 05:00:00	26.426	26.207	26.3165	26.353		26.353
2015-09-17	05:15:00	2015-09-17 05:15:00	26.402	26.158	26.28	26.353		26.353
2015-09-17	05:30:00	2015-09-17 05:30:00	26.378	26.158	26.268	26.304		26.304
2015-09-17	05:45:00	2015-09-17 05:45:00	26.353	26.134	26.2435	26.28		26.28
2015-09-17	06:00:00	2015-09-17 06:00:00	26.353	26.134	26.2435	26.28		26.28
2015-09-17	06:15:00	2015-09-17 06:15:00	26.353	26.134	26.2435	26.28		26.28
2015-09-17	06:30:00	2015-09-17 06:30:00	26.353	26.134	26.2435	26.28		26.28
2015-09-17	06:45:00	2015-09-17 06:45:00	26.353	26.158	26.2555	26.28		26.28
2015-09-17	07:00:00	2015-09-17 07:00:00	26.304	26.134	26.219	26.304		26.304
2015-09-17	07:15:00	2015-09-17 07:15:00	26.231	26.109	26.17	26.28		26.28
2015-09-17	07:30:00	2015-09-17 07:30:00	26.158	26.085	26.1215	26.28		26.28
2015-09-17	07:45:00	2015-09-17 07:45:00	26.158	26.231	26.1945	26.304		26.304
2015-09-17	08:00:00	2015-09-17 08:00:00	25.914	25.793	25.8535	26.256		26.256
2015-09-17	08:15:00	2015-09-17 08:15:00	25.866	25.963	25.9145	26.28		26.28
2015-09-17	08:30:00	2015-09-17 08:30:00	25.914	26.085	25.9995	26.402		26.402
2015-09-17	08:45:00	2015-09-17 08:45:00	26.061	26.353	26.207	26.426		26.426
2015-09-17	09:00:00	2015-09-17 09:00:00	26.28	26.695	26.4875	26.549		26.549
2015-09-17	09:15:00	2015-09-17 09:15:00	26.622	27.063	26.8425	26.646		26.646
2015-09-17	09:30:00	2015-09-17 09:30:00	27.038	27.431	27.2345	26.793		26.793
2015-09-17	09:45:00	2015-09-17 09:45:00	27.407	27.85	27.6285	26.867		26.867
2015-09-17	10:00:00	2015-09-17 10:00:00	27.85	28.171	28.0105	26.842		26.842
2015-09-17	10:15:00	2015-09-17 10:15:00	28.171	28.518	28.3445	26.965		26.965
2015-09-17	10:30:00	2015-09-17 10:30:00	27.974	27.579	27.7765	27.014		27.014
2015-09-17	10:45:00	2015-09-17 10:45:00	27.382	27.284	27.333	27.014		27.014
2015-09-17	11:00:00	2015-09-17 11:00:00	27.21	27.112	27.161	27.038		27.038
2015-09-17	11:15:00	2015-09-17 11:15:00	27.284	27.186	27.235	26.989		26.989
2015-09-17	11:30:00	2015-09-17 11:30:00	27.161	26.965	27.063	26.94		26.94
2015-09-17	11:45:00	2015-09-17 11:45:00	27.161	26.94	27.0505	26.94		26.94
2015-09-17	12:00:00	2015-09-17 12:00:00	27.038	26.744	26.891	27.014		27.014
2015-09-17	12:15:00	2015-09-17 12:15:00	26.94	26.695	26.8175	27.087		27.087
2015-09-17	12:30:00	2015-09-17 12:30:00	27.136	26.916	27.026	26.916		26.916
2015-09-17	12:45:00	2015-09-17 12:45:00	27.112	26.94	27.026	26.94		26.94
2015-09-17	13:00:00	2015-09-17 13:00:00	27.112	26.965	27.0385	26.891		26.891
2015-09-17	13:15:00	2015-09-17 13:15:00	27.063	26.891	26.977	26.769		26.769
2015-09-17	13:30:00	2015-09-17 13:30:00	26.769	26.573	26.671	26.598		26.598
2015-09-17	13:45:00	2015-09-17 13:45:00	26.598	26.402	26.5	26.5		26.5
2015-09-17	14:00:00	2015-09-17 14:00:00	26.573	26.378	26.4755	26.475		26.475
2015-09-17	14:15:00	2015-09-17 14:15:00	26.475	26.28	26.3775	26.402		26.402
2015-09-17	14:30:00	2015-09-17 14:30:00	26.5	26.304	26.402	26.426		26.426
2015-09-17	14:45:00	2015-09-17 14:45:00	26.5	26.28	26.39	26.426		26.426
2015-09-17	15:00:00	2015-09-17 15:00:00	26.524	26.304	26.414	26.426		26.426
2015-09-17	15:15:00	2015-09-17 15:15:00	26.524	26.304	26.414	26.451		26.451
2015-09-17	15:30:00	2015-09-17 15:30:00	26.524	26.28	26.402	26.451		26.451
2015-09-17	15:45:00	2015-09-17 15:45:00	26.5	26.304	26.402	26.426		26.426
2015-09-17	16:00:00	2015-09-17 16:00:00	26.5	26.28	26.39	26.426		26.426
2015-09-17	16:15:00	2015-09-17 16:15:00	26.5	26.304	26.402	26.451		26.451
2015-09-17	16:30:00	2015-09-17 16:30:00	26.524	26.304	26.414	26.451		26.451
2015-09-17	16:45:00	2015-09-17 16:45:00	26.524	26.304	26.414	26.451		26.451
2015-09-17	17:00:00	2015-09-17 17:00:00	26.549	26.329	26.439	26.451		26.451
2015-09-17	17:15:00	2015-09-17 17:15:00	26.573	26.353	26.463	26.451		26.451
2015-09-17	17:30:00	2015-09-17 17:30:00	26.598	26.378	26.488	26.451		26.451
2015-09-17	17:45:00	2015-09-17 17:45:00	26.598	26.378	26.488	26.475		26.475
2015-09-17	18:00:00	2015-09-17 18:00:00	26.598	26.378	26.488	26.475		26.475
2015-09-17	18:15:00	2015-09-17 18:15:00	26.598	26.378	26.488	26.5		26.5
2015-09-17	18:30:00	2015-09-17 18:30:00	26.622	26.378	26.5	26.524		26.524
2015-09-17	18:45:00	2015-09-17 18:45:00	26.622	26.402	26.512	26.549		26.549
2015-09-17	19:00:00	2015-09-17 19:00:00	26.622	26.402	26.512	26.573		26.573
2015-09-17	19:15:00	2015-09-17 19:15:00	26.598	26.378	26.488	26.573		26.573
2015-09-17	19:30:00	2015-09-17 19:30:00	26.573	26.304	26.4385	26.549		26.549
2015-09-17	19:45:00	2015-09-17 19:45:00	26.475	26.256	26.3655	26.549		26.549
2015-09-17	20:00:00	2015-09-17 20:00:00	26.451	26.207	26.329	26.5		26.5
2015-09-17	20:15:00	2015-09-17 20:15:00	26.378	26.158	26.268	26.451		26.451
2015-09-17	20:30:00	2015-09-17 20:30:00	26.304	26.085	26.1945	26.402		26.402
2015-09-17	20:45:00	2015-09-17 20:45:00	26.182	25.987	26.0845	26.256		26.256
2015-09-17	21:00:00	2015-09-17 21:00:00	26.085	25.939	26.012	26.207		26.207
2015-09-17	21:15:00	2015-09-17 21:15:00	25.963	25.89	25.9265	26.158		26.158
2015-09-17	21:30:00	2015-09-17 21:30:00	25.866	25.817	25.8415	26.182		26.182
2015-09-17	21:45:00	2015-09-17 21:45:00	25.817	25.744	25.7805	26.231		26.231
2015-09-17	22:00:00	2015-09-17 22:00:00	25.72	25.647	25.6835	26.134		26.134
2015-09-17	22:15:00	2015-09-17 22:15:00	25.695	25.525	25.61	26.158		26.158
2015-09-17	22:30:00	2015-09-17 22:30:00	25.817	25.623	25.72	26.182		26.182
2015-09-17	22:45:00	2015-09-17 22:45:00	26.012	25.817	25.9145	26.158		26.158
2015-09-17	23:00:00	2015-09-17 23:00:00	26.182	25.793	25.9875	26.036		26.036
2015-09-17	23:15:00	2015-09-17 23:15:00	26.085	25.841	25.963	26.036		26.036
2015-09-17	23:30:00	2015-09-17 23:30:00	26.378	26.182	26.28	26.085		26.085
2015-09-17	23:45:00	2015-09-17 23:45:00	26.549	26.353	26.451	26.061		26.061
2015-09-18	00:00:00	2015-09-18	26.622	26.378	26.5	26.036		26.036
2015-09-18	00:15:00	2015-09-18 00:15:00	26.451	26.207	26.329	26.231		26.231
2015-09-18	00:30:00	2015-09-18 00:30:00	26.426	26.207	26.3165	26.353		26.353
2015-09-18	00:45:00	2015-09-18 00:45:00	26.451	26.182	26.3165	26.353		26.353
2015-09-18	01:00:00	2015-09-18 01:00:00	26.28	26.085	26.1825	26.353		26.353
2015-09-18	01:15:00	2015-09-18 01:15:00	26.353	26.158	26.2555	26.353		26.353
2015-09-18	01:30:00	2015-09-18 01:30:00	26.5	26.28	26.39	26.451		26.451
2015-09-18	01:45:00	2015-09-18 01:45:00	26.573	26.353	26.463	26.5		26.5
2015-09-18	02:00:00	2015-09-18 02:00:00	26.573	26.329	26.451	26.5		26.5
2015-09-18	02:15:00	2015-09-18 02:15:00	26.426	26.207	26.3165	26.353		26.353
2015-09-18	02:30:00	2015-09-18 02:30:00	26.402	26.182	26.292	26.329		26.329
2015-09-18	02:45:00	2015-09-18 02:45:00	26.402	26.182	26.292	26.353		26.353
2015-09-18	03:00:00	2015-09-18 03:00:00	26.426	26.207	26.3165	26.353		26.353
2015-09-18	03:15:00	2015-09-18 03:15:00	26.426	26.182	26.304	26.353		26.353
2015-09-18	03:30:00	2015-09-18 03:30:00	26.402	26.182	26.292	26.329		26.329
2015-09-18	03:45:00	2015-09-18 03:45:00	26.402	26.182	26.292	26.329		26.329
2015-09-18	04:00:00	2015-09-18 04:00:00	26.402	26.182	26.292	26.329		26.329
2015-09-18	04:15:00	2015-09-18 04:15:00	26.402	26.158	26.28	26.304		26.304
2015-09-18	04:30:00	2015-09-18 04:30:00	26.402	26.182	26.292	26.329		26.329
2015-09-18	04:45:00	2015-09-18 04:45:00	26.402	26.182	26.292	26.329		26.329
2015-09-18	05:00:00	2015-09-18 05:00:00	26.402	26.182	26.292	26.329		26.329
2015-09-18	05:15:00	2015-09-18 05:15:00	26.402	26.182	26.292	26.329		26.329
2015-09-18	05:30:00	2015-09-18 05:30:00	26.402	26.182	26.292	26.329		26.329
2015-09-18	05:45:00	2015-09-18 05:45:00	26.402	26.182	26.292	26.329		26.329
2015-09-18	06:00:00	2015-09-18 06:00:00	26.402	26.182	26.292	26.329		26.329
2015-09-18	06:15:00	2015-09-18 06:15:00	26.426	26.231	26.3285	26.353		26.353
2015-09-18	06:30:00	2015-09-18 06:30:00	26.451	26.231	26.341	26.378		26.378
2015-09-18	06:45:00	2015-09-18 06:45:00	26.451	26.256	26.3535	26.378		26.378
2015-09-18	07:00:00	2015-09-18 07:00:00	26.475	26.304	26.3895	26.402		26.402
2015-09-18	07:15:00	2015-09-18 07:15:00	26.5	26.378	26.439	26.475		26.475
2015-09-18	07:30:00	2015-09-18 07:30:00	26.524	26.426	26.475	26.5		26.5
2015-09-18	07:45:00	2015-09-18 07:45:00	26.549	26.573	26.561	26.549		26.549
2015-09-18	08:00:00	2015-09-18 08:00:00	26.695	26.818	26.7565	26.598		26.598
2015-09-18	08:15:00	2015-09-18 08:15:00	26.891	27.136	27.0135	26.671		26.671
2015-09-18	08:30:00	2015-09-18 08:30:00	27.235	27.554	27.3945	26.818		26.818
2015-09-18	08:45:00	2015-09-18 08:45:00	27.628	27.899	27.7635	26.989		26.989
2015-09-18	09:00:00	2015-09-18 09:00:00	27.924	28.245	28.0845	27.21		27.21
2015-09-18	09:15:00	2015-09-18 09:15:00	28.27	28.692	28.481	27.407		27.407
2015-09-18	09:30:00	2015-09-18 09:30:00	28.667	29.215	28.941	27.628		27.628
2015-09-18	09:45:00	2015-09-18 09:45:00	29.19	29.765	29.4775	27.801		27.801
2015-09-18	10:00:00	2015-09-18 10:00:00	29.74	30.243	29.9915	27.751		27.751
2015-09-18	10:15:00	2015-09-18 10:15:00	30.243	30.773	30.508	27.825		27.825
2015-09-18	10:30:00	2015-09-18 10:30:00	30.748	31.255	31.0015	27.949		27.949
2015-09-18	10:45:00	2015-09-18 10:45:00	31.281	31.51	31.3955	27.924		27.924
2015-09-18	11:00:00	2015-09-18 11:00:00	29.29	28.916	29.103	27.825		27.825
2015-09-18	11:15:00	2015-09-18 11:15:00	28.345	28.196	28.2705	27.776		27.776
2015-09-18	11:30:00	2015-09-18 11:30:00	28.27	28.196	28.233	27.677		27.677
2015-09-18	11:45:00	2015-09-18 11:45:00	28.295	28.072	28.1835	27.554		27.554
2015-09-18	12:00:00	2015-09-18 12:00:00	27.949	27.604	27.7765	27.431		27.431
2015-09-18	12:15:00	2015-09-18 12:15:00	27.628	27.358	27.493	27.358		27.358
2015-09-18	12:30:00	2015-09-18 12:30:00	27.604	27.333	27.4685	27.333		27.333
2015-09-18	12:45:00	2015-09-18 12:45:00	27.505	27.21	27.3575	27.308		27.308
2015-09-18	13:00:00	2015-09-18 13:00:00	27.751	27.579	27.665	27.21		27.21
2015-09-18	13:15:00	2015-09-18 13:15:00	27.85	27.702	27.776	27.112		27.112
2015-09-18	13:30:00	2015-09-18 13:30:00	27.456	27.284	27.37	26.916		26.916
2015-09-18	13:45:00	2015-09-18 13:45:00	27.112	26.867	26.9895	26.744		26.744
2015-09-18	14:00:00	2015-09-18 14:00:00	26.769	26.573	26.671	26.622		26.622
2015-09-18	14:15:00	2015-09-18 14:15:00	26.646	26.426	26.536	26.573		26.573
2015-09-18	14:30:00	2015-09-18 14:30:00	26.646	26.426	26.536	26.549		26.549
2015-09-18	14:45:00	2015-09-18 14:45:00	26.598	26.378	26.488	26.5		26.5
2015-09-18	15:00:00	2015-09-18 15:00:00	26.573	26.378	26.4755	26.5		26.5
2015-09-18	15:15:00	2015-09-18 15:15:00	26.598	26.378	26.488	26.5		26.5
2015-09-18	15:30:00	2015-09-18 15:30:00	26.598	26.378	26.488	26.5		26.5
2015-09-18	15:45:00	2015-09-18 15:45:00	26.598	26.378	26.488	26.5		26.5
2015-09-18	16:00:00	2015-09-18 16:00:00	26.573	26.353	26.463	26.5		26.5
2015-09-18	16:15:00	2015-09-18 16:15:00	26.598	26.378	26.488	26.5		26.5
2015-09-18	16:30:00	2015-09-18 16:30:00	26.598	26.378	26.488	26.5		26.5
2015-09-18	16:45:00	2015-09-18 16:45:00	26.598	26.378	26.488	26.5		26.5
2015-09-18	17:00:00	2015-09-18 17:00:00	26.598	26.378	26.488	26.524		26.524
2015-09-18	17:15:00	2015-09-18 17:15:00	26.598	26.378	26.488	26.524		26.524
2015-09-18	17:30:00	2015-09-18 17:30:00	26.598	26.378	26.488	26.524		26.524
2015-09-18	17:45:00	2015-09-18 17:45:00	26.622	26.402	26.512	26.549		26.549
2015-09-18	18:00:00	2015-09-18 18:00:00	26.671	26.451	26.561	26.573		26.573
2015-09-18	18:15:00	2015-09-18 18:15:00	26.695	26.475	26.585	26.622		26.622
2015-09-18	18:30:00	2015-09-18 18:30:00	26.744	26.524	26.634	26.646		26.646
2015-09-18	18:45:00	2015-09-18 18:45:00	26.793	26.573	26.683	26.671		26.671
2015-09-18	19:00:00	2015-09-18 19:00:00	26.793	26.573	26.683	26.72		26.72
2015-09-18	19:15:00	2015-09-18 19:15:00	26.793	26.573	26.683	26.744		26.744
2015-09-18	19:30:00	2015-09-18 19:30:00	26.793	26.573	26.683	26.744		26.744
2015-09-18	19:45:00	2015-09-18 19:45:00	26.769	26.549	26.659	26.744		26.744
2015-09-18	20:00:00	2015-09-18 20:00:00	26.695	26.451	26.573	26.72		26.72
2015-09-18	20:15:00	2015-09-18 20:15:00	26.671	26.426	26.5485	26.695		26.695
2015-09-18	20:30:00	2015-09-18 20:30:00	26.646	26.426	26.536	26.695		26.695
2015-09-18	20:45:00	2015-09-18 20:45:00	26.573	26.353	26.463	26.671		26.671
2015-09-18	21:00:00	2015-09-18 21:00:00	26.5	26.28	26.39	26.622		26.622
2015-09-18	21:15:00	2015-09-18 21:15:00	26.402	26.207	26.3045	26.573		26.573
2015-09-18	21:30:00	2015-09-18 21:30:00	26.231	26.085	26.158	26.549		26.549
2015-09-18	21:45:00	2015-09-18 21:45:00	26.182	26.036	26.109	26.549		26.549
2015-09-18	22:00:00	2015-09-18 22:00:00	26.036	25.987	26.0115	26.5		26.5
2015-09-18	22:15:00	2015-09-18 22:15:00	25.939	25.914	25.9265	26.475		26.475
2015-09-18	22:30:00	2015-09-18 22:30:00	25.89	25.768	25.829	26.475		26.475
2015-09-18	22:45:00	2015-09-18 22:45:00	26.061	25.89	25.9755	26.451		26.451
2015-09-18	23:00:00	2015-09-18 23:00:00	26.182	25.987	26.0845	26.426		26.426
2015-09-18	23:15:00	2015-09-18 23:15:00	26.28	26.036	26.158	26.353		26.353
2015-09-18	23:30:00	2015-09-18 23:30:00	26.28	25.914	26.097	26.329		26.329
2015-09-18	23:45:00	2015-09-18 23:45:00	26.402	26.207	26.3045	26.353		26.353
2015-09-19	00:00:00	2015-09-19	26.695	26.475	26.585	26.353		26.353
2015-09-19	00:15:00	2015-09-19 00:15:00	26.72	26.5	26.61	26.304		26.304
2015-09-19	00:30:00	2015-09-19 00:30:00	26.598	26.378	26.488	26.475		26.475
2015-09-19	00:45:00	2015-09-19 00:45:00	26.573	26.353	26.463	26.549		26.549
2015-09-19	01:00:00	2015-09-19 01:00:00	26.549	26.329	26.439	26.5		26.5
2015-09-19	01:15:00	2015-09-19 01:15:00	26.549	26.304	26.4265	26.475		26.475
2015-09-19	01:30:00	2015-09-19 01:30:00	26.524	26.304	26.414	26.5		26.5
2015-09-19	01:45:00	2015-09-19 01:45:00	26.671	26.475	26.573	26.524		26.524
2015-09-19	02:00:00	2015-09-19 02:00:00	26.793	26.573	26.683	26.671		26.671
2015-09-19	02:15:00	2015-09-19 02:15:00	26.72	26.475	26.5975	26.622		26.622
2015-09-19	02:30:00	2015-09-19 02:30:00	26.695	26.475	26.585	26.573		26.573
2015-09-19	02:45:00	2015-09-19 02:45:00	26.573	26.329	26.451	26.475		26.475
2015-09-19	03:00:00	2015-09-19 03:00:00	26.524	26.304	26.414	26.451		26.451
2015-09-19	03:15:00	2015-09-19 03:15:00	26.524	26.304	26.414	26.475		26.475
2015-09-19	03:30:00	2015-09-19 03:30:00	26.549	26.329	26.439	26.475		26.475
2015-09-19	03:45:00	2015-09-19 03:45:00	26.549	26.329	26.439	26.5		26.5
2015-09-19	04:00:00	2015-09-19 04:00:00	26.573	26.353	26.463	26.5		26.5
2015-09-19	04:15:00	2015-09-19 04:15:00	26.573	26.353	26.463	26.524		26.524
2015-09-19	04:30:00	2015-09-19 04:30:00	26.598	26.353	26.4755	26.5		26.5
2015-09-19	04:45:00	2015-09-19 04:45:00	26.573	26.353	26.463	26.475		26.475
2015-09-19	05:00:00	2015-09-19 05:00:00	26.573	26.353	26.463	26.524		26.524
2015-09-19	05:15:00	2015-09-19 05:15:00	26.573	26.353	26.463	26.5		26.5
2015-09-19	05:30:00	2015-09-19 05:30:00	26.573	26.353	26.463	26.5		26.5
2015-09-19	05:45:00	2015-09-19 05:45:00	26.549	26.329	26.439	26.5		26.5
2015-09-19	06:00:00	2015-09-19 06:00:00	26.549	26.329	26.439	26.475		26.475
2015-09-19	06:15:00	2015-09-19 06:15:00	26.524	26.304	26.414	26.451		26.451
2015-09-19	06:30:00	2015-09-19 06:30:00	26.524	26.304	26.414	26.451		26.451
2015-09-19	06:45:00	2015-09-19 06:45:00	26.549	26.353	26.451	26.475		26.475
2015-09-19	07:00:00	2015-09-19 07:00:00	26.598	26.402	26.5	26.524		26.524
2015-09-19	07:15:00	2015-09-19 07:15:00	26.646	26.451	26.5485	26.573		26.573
2015-09-19	07:30:00	2015-09-19 07:30:00	26.695	26.622	26.6585	26.646		26.646
2015-09-19	07:45:00	2015-09-19 07:45:00	26.744	26.671	26.7075	26.695		26.695
2015-09-19	08:00:00	2015-09-19 08:00:00	26.818	26.818	26.818	26.744		26.744
2015-09-19	08:15:00	2015-09-19 08:15:00	26.965	27.112	27.0385	26.793		26.793
2015-09-19	08:30:00	2015-09-19 08:30:00	27.112	27.333	27.2225	26.891		26.891
2015-09-19	08:45:00	2015-09-19 08:45:00	27.382	27.677	27.5295	27.038		27.038
2015-09-19	09:00:00	2015-09-19 09:00:00	27.776	28.122	27.949	27.186		27.186
2015-09-19	09:15:00	2015-09-19 09:15:00	28.245	28.667	28.456	27.333		27.333
2015-09-19	09:30:00	2015-09-19 09:30:00	28.841	29.29	29.0655	27.481		27.481
2015-09-19	09:45:00	2015-09-19 09:45:00	29.49	29.865	29.6775	27.653		27.653
2015-09-19	10:00:00	2015-09-19 10:00:00	30.167	30.369	30.268	27.751		27.751
2015-09-19	10:15:00	2015-09-19 10:15:00	30.773	31.128	30.9505	27.974		27.974
2015-09-19	10:30:00	2015-09-19 10:30:00	31.433	31.74	31.5865	28.072		28.072
2015-09-19	10:45:00	2015-09-19 10:45:00	32.098	32.562	32.33	28.171		28.171
2015-09-19	11:00:00	2015-09-19 11:00:00	32.458	32.742	32.6	28.171		28.171
2015-09-19	11:15:00	2015-09-19 11:15:00	30.976	30.545	30.7605	28.196		28.196
2015-09-19	11:30:00	2015-09-19 11:30:00	29.715	29.515	29.615	28.295		28.295
2015-09-19	11:45:00	2015-09-19 11:45:00	29.115	28.99	29.0525	27.974		27.974
2015-09-19	12:00:00	2015-09-19 12:00:00	29.065	28.891	28.978	27.702		27.702
2015-09-19	12:15:00	2015-09-19 12:15:00	29.015	28.667	28.841	27.727		27.727
2015-09-19	12:30:00	2015-09-19 12:30:00	28.419	28.171	28.295	27.628		27.628
2015-09-19	12:45:00	2015-09-19 12:45:00	28.171	27.85	28.0105	27.554		27.554
2015-09-19	13:00:00	2015-09-19 13:00:00	27.949	27.677	27.813	27.481		27.481
2015-09-19	13:15:00	2015-09-19 13:15:00	27.998	27.727	27.8625	27.333		27.333
2015-09-19	13:30:00	2015-09-19 13:30:00	28.221	27.998	28.1095	27.21		27.21
2015-09-19	13:45:00	2015-09-19 13:45:00	28.097	27.974	28.0355	27.136		27.136
2015-09-19	14:00:00	2015-09-19 14:00:00	27.677	27.505	27.591	27.038		27.038
2015-09-19	14:15:00	2015-09-19 14:15:00	27.186	26.965	27.0755	26.891		26.891
2015-09-19	14:30:00	2015-09-19 14:30:00	26.989	26.769	26.879	26.744		26.744
2015-09-19	14:45:00	2015-09-19 14:45:00	26.793	26.598	26.6955	26.695		26.695
2015-09-19	15:00:00	2015-09-19 15:00:00	26.793	26.573	26.683	26.695		26.695
2015-09-19	15:15:00	2015-09-19 15:15:00	26.769	26.549	26.659	26.671		26.671
2015-09-19	15:30:00	2015-09-19 15:30:00	26.744	26.524	26.634	26.646		26.646
2015-09-19	15:45:00	2015-09-19 15:45:00	26.744	26.524	26.634	26.646		26.646
2015-09-19	16:00:00	2015-09-19 16:00:00	26.72	26.5	26.61	26.646		26.646
2015-09-19	16:15:00	2015-09-19 16:15:00	26.695	26.475	26.585	26.622		26.622
2015-09-19	16:30:00	2015-09-19 16:30:00	26.695	26.475	26.585	26.622		26.622
2015-09-19	16:45:00	2015-09-19 16:45:00	26.695	26.475	26.585	26.622		26.622
2015-09-19	17:00:00	2015-09-19 17:00:00	26.695	26.475	26.585	26.622		26.622
2015-09-19	17:15:00	2015-09-19 17:15:00	26.695	26.475	26.585	26.622		26.622
2015-09-19	17:30:00	2015-09-19 17:30:00	26.72	26.5	26.61	26.622		26.622
2015-09-19	17:45:00	2015-09-19 17:45:00	26.769	26.573	26.671	26.622		26.622
2015-09-19	18:00:00	2015-09-19 18:00:00	26.793	26.573	26.683	26.622		26.622
2015-09-19	18:15:00	2015-09-19 18:15:00	26.818	26.598	26.708	26.622		26.622
2015-09-19	18:30:00	2015-09-19 18:30:00	26.867	26.646	26.7565	26.622		26.622
2015-09-19	18:45:00	2015-09-19 18:45:00	26.916	26.695	26.8055	26.671		26.671
2015-09-19	19:00:00	2015-09-19 19:00:00	26.94	26.72	26.83	26.671		26.671
2015-09-19	19:15:00	2015-09-19 19:15:00	26.989	26.769	26.879	26.793		26.793
2015-09-19	19:30:00	2015-09-19 19:30:00	27.014	26.793	26.9035	26.94		26.94
2015-09-19	19:45:00	2015-09-19 19:45:00	27.014	26.793	26.9035	26.989		26.989
2015-09-19	20:00:00	2015-09-19 20:00:00	26.989	26.769	26.879	27.038		27.038
2015-09-19	20:15:00	2015-09-19 20:15:00	26.989	26.744	26.8665	27.038		27.038
2015-09-19	20:30:00	2015-09-19 20:30:00	26.94	26.72	26.83	27.014		27.014
2015-09-19	20:45:00	2015-09-19 20:45:00	26.916	26.695	26.8055	26.965		26.965
2015-09-19	21:00:00	2015-09-19 21:00:00	26.867	26.646	26.7565	26.94		26.94
2015-09-19	21:15:00	2015-09-19 21:15:00	26.793	26.573	26.683	26.965		26.965
2015-09-19	21:30:00	2015-09-19 21:30:00	26.671	26.5	26.5855	26.965		26.965
2015-09-19	21:45:00	2015-09-19 21:45:00	26.549	26.378	26.4635	27.038		27.038
2015-09-19	22:00:00	2015-09-19 22:00:00	26.451	26.28	26.3655	27.087		27.087
2015-09-19	22:15:00	2015-09-19 22:15:00	26.378	26.182	26.28	27.087		27.087
2015-09-19	22:30:00	2015-09-19 22:30:00	26.304	26.085	26.1945	27.087		27.087
2015-09-19	22:45:00	2015-09-19 22:45:00	26.329	26.109	26.219	27.063		27.063
2015-09-19	23:00:00	2015-09-19 23:00:00	26.426	26.231	26.3285	26.867		26.867
2015-09-19	23:15:00	2015-09-19 23:15:00	26.524	26.28	26.402	26.769		26.769
2015-09-19	23:30:00	2015-09-19 23:30:00	26.549	26.329	26.439	26.72		26.72
2015-09-19	23:45:00	2015-09-19 23:45:00	26.598	26.304	26.451	26.695		26.695
2015-09-20	00:00:00	2015-09-20	26.549	26.378	26.4635	26.622		26.622
2015-09-20	00:15:00	2015-09-20 00:15:00	26.867	26.646	26.7565	26.695		26.695
2015-09-20	00:30:00	2015-09-20 00:30:00	26.891	26.671	26.781	26.671		26.671
2015-09-20	00:45:00	2015-09-20 00:45:00	26.842	26.598	26.72	26.671		26.671
2015-09-20	01:00:00	2015-09-20 01:00:00	26.769	26.549	26.659	26.867		26.867
2015-09-20	01:15:00	2015-09-20 01:15:00	26.72	26.5	26.61	26.695		26.695
2015-09-20	01:30:00	2015-09-20 01:30:00	26.72	26.5	26.61	26.646		26.646
2015-09-20	01:45:00	2015-09-20 01:45:00	26.695	26.475	26.585	26.646		26.646
2015-09-20	02:00:00	2015-09-20 02:00:00	26.744	26.5	26.622	26.671		26.671
2015-09-20	02:15:00	2015-09-20 02:15:00	26.965	26.744	26.8545	26.891		26.891
2015-09-20	02:30:00	2015-09-20 02:30:00	26.989	26.769	26.879	26.867		26.867
2015-09-20	02:45:00	2015-09-20 02:45:00	26.94	26.72	26.83	26.867		26.867
2015-09-20	03:00:00	2015-09-20 03:00:00	26.916	26.671	26.7935	26.818		26.818
2015-09-20	03:15:00	2015-09-20 03:15:00	26.793	26.549	26.671	26.671		26.671
2015-09-20	03:30:00	2015-09-20 03:30:00	26.744	26.524	26.634	26.695		26.695
2015-09-20	03:45:00	2015-09-20 03:45:00	26.769	26.549	26.659	26.695		26.695
2015-09-20	04:00:00	2015-09-20 04:00:00	26.769	26.549	26.659	26.695		26.695
2015-09-20	04:15:00	2015-09-20 04:15:00	26.744	26.524	26.634	26.671		26.671
2015-09-20	04:30:00	2015-09-20 04:30:00	26.744	26.524	26.634	26.646		26.646
2015-09-20	04:45:00	2015-09-20 04:45:00	26.744	26.5	26.622	26.671		26.671
2015-09-20	05:00:00	2015-09-20 05:00:00	26.744	26.524	26.634	26.671		26.671
2015-09-20	05:15:00	2015-09-20 05:15:00	26.744	26.524	26.634	26.671		26.671
2015-09-20	05:30:00	2015-09-20 05:30:00	26.744	26.524	26.634	26.671		26.671
2015-09-20	05:45:00	2015-09-20 05:45:00	26.744	26.524	26.634	26.671		26.671
2015-09-20	06:00:00	2015-09-20 06:00:00	26.744	26.524	26.634	26.671		26.671
2015-09-20	06:15:00	2015-09-20 06:15:00	26.744	26.524	26.634	26.671		26.671
2015-09-20	06:30:00	2015-09-20 06:30:00	26.793	26.573	26.683	26.695		26.695
2015-09-20	06:45:00	2015-09-20 06:45:00	26.793	26.573	26.683	26.72		26.72
2015-09-20	07:00:00	2015-09-20 07:00:00	26.793	26.598	26.6955	26.72		26.72
2015-09-20	07:15:00	2015-09-20 07:15:00	26.793	26.598	26.6955	26.744		26.744
2015-09-20	07:30:00	2015-09-20 07:30:00	26.818	26.646	26.732	26.744		26.744
2015-09-20	07:45:00	2015-09-20 07:45:00	26.867	26.695	26.781	26.793		26.793
2015-09-20	08:00:00	2015-09-20 08:00:00	26.989	26.891	26.94	26.916		26.916
2015-09-20	08:15:00	2015-09-20 08:15:00	27.014	26.94	26.977	26.965		26.965
2015-09-20	08:30:00	2015-09-20 08:30:00	27.087	27.014	27.0505	26.989		26.989
2015-09-20	08:45:00	2015-09-20 08:45:00	27.21	27.284	27.247	27.063		27.063
2015-09-20	09:00:00	2015-09-20 09:00:00	27.358	27.456	27.407	27.112		27.112
2015-09-20	09:15:00	2015-09-20 09:15:00	27.702	28.023	27.8625	27.284		27.284
2015-09-20	09:30:00	2015-09-20 09:30:00	28.023	28.419	28.221	27.382		27.382
2015-09-20	09:45:00	2015-09-20 09:45:00	28.791	29.29	29.0405	27.579		27.579
2015-09-20	10:00:00	2015-09-20 10:00:00	29.54	29.941	29.7405	27.677		27.677
2015-09-20	10:15:00	2015-09-20 10:15:00	30.268	30.545	30.4065	27.727		27.727
2015-09-20	10:30:00	2015-09-20 10:30:00	30.874	31.153	31.0135	27.899		27.899
2015-09-20	10:45:00	2015-09-20 10:45:00	31.51	31.714	31.612	28.023		28.023
2015-09-20	11:00:00	2015-09-20 11:00:00	32.227	32.355	32.291	28.171		28.171
2015-09-20	11:15:00	2015-09-20 11:15:00	32.562	32.15	32.356	28.171		28.171
2015-09-20	11:30:00	2015-09-20 11:30:00	31.052	30.925	30.9885	28.345		28.345
2015-09-20	11:45:00	2015-09-20 11:45:00	30.217	30.016	30.1165	28.468		28.468
2015-09-20	12:00:00	2015-09-20 12:00:00	29.991	29.79	29.8905	28.593		28.593
2015-09-20	12:15:00	2015-09-20 12:15:00	29.74	29.59	29.665	28.642		28.642
2015-09-20	12:30:00	2015-09-20 12:30:00	29.815	29.464	29.6395	28.32		28.32
2015-09-20	12:45:00	2015-09-20 12:45:00	29.14	28.692	28.916	28.048		28.048
2015-09-20	13:00:00	2015-09-20 13:00:00	28.766	28.493	28.6295	27.776		27.776
2015-09-20	13:15:00	2015-09-20 13:15:00	28.717	28.419	28.568	27.825		27.825
2015-09-20	13:30:00	2015-09-20 13:30:00	28.518	28.171	28.3445	27.801		27.801
2015-09-20	13:45:00	2015-09-20 13:45:00	28.32	27.998	28.159	27.604		27.604
2015-09-20	14:00:00	2015-09-20 14:00:00	28.295	28.023	28.159	27.456		27.456
2015-09-20	14:15:00	2015-09-20 14:15:00	28.221	28.023	28.122	27.407		27.407
2015-09-20	14:30:00	2015-09-20 14:30:00	27.727	27.53	27.6285	27.186		27.186
2015-09-20	14:45:00	2015-09-20 14:45:00	27.308	27.087	27.1975	27.014		27.014
2015-09-20	15:00:00	2015-09-20 15:00:00	27.112	26.891	27.0015	26.94		26.94
2015-09-20	15:15:00	2015-09-20 15:15:00	27.038	26.842	26.94	26.916		26.916
2015-09-20	15:30:00	2015-09-20 15:30:00	27.014	26.793	26.9035	26.891		26.891
2015-09-20	15:45:00	2015-09-20 15:45:00	26.965	26.744	26.8545	26.867		26.867
2015-09-20	16:00:00	2015-09-20 16:00:00	26.94	26.72	26.83	26.842		26.842
2015-09-20	16:15:00	2015-09-20 16:15:00	26.916	26.695	26.8055	26.818		26.818
2015-09-20	16:30:00	2015-09-20 16:30:00	26.891	26.671	26.781	26.793		26.793
2015-09-20	16:45:00	2015-09-20 16:45:00	26.916	26.695	26.8055	26.793		26.793
2015-09-20	17:00:00	2015-09-20 17:00:00	26.891	26.671	26.781	26.793		26.793
2015-09-20	17:15:00	2015-09-20 17:15:00	26.891	26.671	26.781	26.769		26.769
2015-09-20	17:30:00	2015-09-20 17:30:00	26.916	26.695	26.8055	26.793		26.793
2015-09-20	17:45:00	2015-09-20 17:45:00	26.965	26.744	26.8545	26.818		26.818
2015-09-20	18:00:00	2015-09-20 18:00:00	26.965	26.744	26.8545	26.842		26.842
2015-09-20	18:15:00	2015-09-20 18:15:00	26.989	26.769	26.879	26.842		26.842
2015-09-20	18:30:00	2015-09-20 18:30:00	27.038	26.818	26.928	26.891		26.891
2015-09-20	18:45:00	2015-09-20 18:45:00	27.014	26.793	26.9035	26.842		26.842
2015-09-20	19:00:00	2015-09-20 19:00:00	27.014	26.793	26.9035	26.818		26.818
2015-09-20	19:15:00	2015-09-20 19:15:00	27.038	26.818	26.928	26.842		26.842
2015-09-20	19:30:00	2015-09-20 19:30:00	27.087	26.867	26.977	26.891		26.891
2015-09-20	19:45:00	2015-09-20 19:45:00	27.112	26.867	26.9895	26.965		26.965
2015-09-20	20:00:00	2015-09-20 20:00:00	27.087	26.867	26.977	27.014		27.014
2015-09-20	20:15:00	2015-09-20 20:15:00	27.087	26.842	26.9645	26.989		26.989
2015-09-20	20:30:00	2015-09-20 20:30:00	27.038	26.842	26.94	26.965		26.965
2015-09-20	20:45:00	2015-09-20 20:45:00	27.014	26.793	26.9035	26.94		26.94
2015-09-20	21:00:00	2015-09-20 21:00:00	26.989	26.744	26.8665	26.916		26.916
2015-09-20	21:15:00	2015-09-20 21:15:00	26.94	26.671	26.8055	26.916		26.916
2015-09-20	21:30:00	2015-09-20 21:30:00	26.891	26.646	26.7685	26.916		26.916
2015-09-20	21:45:00	2015-09-20 21:45:00	26.842	26.622	26.732	26.94		26.94
2015-09-20	22:00:00	2015-09-20 22:00:00	26.818	26.573	26.6955	26.989		26.989
2015-09-20	22:15:00	2015-09-20 22:15:00	26.769	26.451	26.61	27.087		27.087
2015-09-20	22:30:00	2015-09-20 22:30:00	26.671	26.402	26.5365	27.136		27.136
2015-09-20	22:45:00	2015-09-20 22:45:00	26.646	26.378	26.512	27.235		27.235
2015-09-20	23:00:00	2015-09-20 23:00:00	26.646	26.378	26.512	27.063		27.063
2015-09-20	23:15:00	2015-09-20 23:15:00	26.622	26.402	26.512	27.014		27.014
2015-09-20	23:30:00	2015-09-20 23:30:00	26.622	26.378	26.5	27.087		27.087
2015-09-20	23:45:00	2015-09-20 23:45:00	26.622	26.378	26.5	27.063		27.063
2015-09-21	00:00:00	2015-09-21	26.598	26.329	26.4635	27.063		27.063
2015-09-21	00:15:00	2015-09-21 00:15:00	26.5	26.304	26.402	27.112		27.112
2015-09-21	00:30:00	2015-09-21 00:30:00	26.867	26.744	26.8055	27.087		27.087
2015-09-21	00:45:00	2015-09-21 00:45:00	27.063	26.842	26.9525	27.014		27.014
2015-09-21	01:00:00	2015-09-21 01:00:00	27.038	26.818	26.928	26.842		26.842
2015-09-21	01:15:00	2015-09-21 01:15:00	26.916	26.671	26.7935	26.965		26.965
2015-09-21	01:30:00	2015-09-21 01:30:00	26.891	26.695	26.793	26.891		26.891
2015-09-21	01:45:00	2015-09-21 01:45:00	26.867	26.646	26.7565	26.818		26.818
2015-09-21	02:00:00	2015-09-21 02:00:00	26.891	26.671	26.781	26.793		26.793
2015-09-21	02:15:00	2015-09-21 02:15:00	26.842	26.622	26.732	26.793		26.793
2015-09-21	02:30:00	2015-09-21 02:30:00	26.842	26.622	26.732	26.793		26.793
2015-09-21	02:45:00	2015-09-21 02:45:00	27.014	26.793	26.9035	26.842		26.842
2015-09-21	03:00:00	2015-09-21 03:00:00	27.087	26.867	26.977	26.965		26.965
2015-09-21	03:15:00	2015-09-21 03:15:00	27.087	26.867	26.977	26.989		26.989
2015-09-21	03:30:00	2015-09-21 03:30:00	27.063	26.842	26.9525	26.989		26.989
2015-09-21	03:45:00	2015-09-21 03:45:00	26.989	26.769	26.879	26.891		26.891
2015-09-21	04:00:00	2015-09-21 04:00:00	26.891	26.671	26.781	26.793		26.793
2015-09-21	04:15:00	2015-09-21 04:15:00	26.867	26.646	26.7565	26.793		26.793
2015-09-21	04:30:00	2015-09-21 04:30:00	26.867	26.646	26.7565	26.818		26.818
2015-09-21	04:45:00	2015-09-21 04:45:00	26.867	26.646	26.7565	26.793		26.793
2015-09-21	05:00:00	2015-09-21 05:00:00	26.867	26.646	26.7565	26.793		26.793
2015-09-21	05:15:00	2015-09-21 05:15:00	26.867	26.622	26.7445	26.793		26.793
2015-09-21	05:30:00	2015-09-21 05:30:00	26.867	26.622	26.7445	26.793		26.793
2015-09-21	05:45:00	2015-09-21 05:45:00	26.867	26.646	26.7565	26.793		26.793
2015-09-21	06:00:00	2015-09-21 06:00:00	26.867	26.646	26.7565	26.793		26.793
2015-09-21	06:15:00	2015-09-21 06:15:00	26.94	26.72	26.83	26.818		26.818
2015-09-21	06:30:00	2015-09-21 06:30:00	27.014	26.793	26.9035	26.916		26.916
2015-09-21	06:45:00	2015-09-21 06:45:00	27.038	26.818	26.928	26.94		26.94
2015-09-21	07:00:00	2015-09-21 07:00:00	26.989	26.793	26.891	26.891		26.891
2015-09-21	07:15:00	2015-09-21 07:15:00	26.965	26.769	26.867	26.867		26.867
2015-09-21	07:30:00	2015-09-21 07:30:00	26.965	26.769	26.867	26.842		26.842
2015-09-21	07:45:00	2015-09-21 07:45:00	26.989	26.818	26.9035	26.891		26.891
2015-09-21	08:00:00	2015-09-21 08:00:00	27.038	26.891	26.9645	26.94		26.94
2015-09-21	08:15:00	2015-09-21 08:15:00	27.087	26.989	27.038	27.038		27.038
2015-09-21	08:30:00	2015-09-21 08:30:00	27.161	27.112	27.1365	27.112		27.112
2015-09-21	08:45:00	2015-09-21 08:45:00	27.21	27.161	27.1855	27.186		27.186
2015-09-21	09:00:00	2015-09-21 09:00:00	27.308	27.358	27.333	27.259		27.259
2015-09-21	09:15:00	2015-09-21 09:15:00	27.505	27.677	27.591	27.284		27.284
2015-09-21	09:30:00	2015-09-21 09:30:00	27.825	27.924	27.8745	27.431		27.431
2015-09-21	09:45:00	2015-09-21 09:45:00	28.122	28.394	28.258	27.505		27.505
2015-09-21	10:00:00	2015-09-21 10:00:00	28.345	28.518	28.4315	27.579		27.579
2015-09-21	10:15:00	2015-09-21 10:15:00	28.667	28.916	28.7915	27.727		27.727
2015-09-21	10:30:00	2015-09-21 10:30:00	29.115	29.389	29.252	27.875		27.875
2015-09-21	10:45:00	2015-09-21 10:45:00	29.991	30.016	30.0035	27.974		27.974
2015-09-21	11:00:00	2015-09-21 11:00:00	30.52	30.646	30.583	28.122		28.122
2015-09-21	11:15:00	2015-09-21 11:15:00	30.798	30.824	30.811	28.32		28.32
2015-09-21	11:30:00	2015-09-21 11:30:00	30.672	30.469	30.5705	28.444		28.444
2015-09-21	11:45:00	2015-09-21 11:45:00	30.722	30.748	30.735	28.518		28.518
2015-09-21	12:00:00	2015-09-21 12:00:00	30.773	30.798	30.7855	28.593		28.593
2015-09-21	12:15:00	2015-09-21 12:15:00	30.596	30.217	30.4065	28.617		28.617
2015-09-21	12:30:00	2015-09-21 12:30:00	30.091	29.84	29.9655	28.642		28.642
2015-09-21	12:45:00	2015-09-21 12:45:00	29.89	29.54	29.715	28.742		28.742
2015-09-21	13:00:00	2015-09-21 13:00:00	29.69	29.414	29.552	28.717		28.717
2015-09-21	13:15:00	2015-09-21 13:15:00	28.916	28.468	28.692	28.617		28.617
2015-09-21	13:30:00	2015-09-21 13:30:00	28.444	28.196	28.32	28.468		28.468
2015-09-21	13:45:00	2015-09-21 13:45:00	28.692	28.394	28.543	28.468		28.468
2015-09-21	14:00:00	2015-09-21 14:00:00	28.667	28.345	28.506	28.295		28.295
2015-09-21	14:15:00	2015-09-21 14:15:00	28.568	28.27	28.419	27.899		27.899
2015-09-21	14:30:00	2015-09-21 14:30:00	28.444	28.147	28.2955	27.875		27.875
2015-09-21	14:45:00	2015-09-21 14:45:00	28.518	28.27	28.394	27.801		27.801
2015-09-21	15:00:00	2015-09-21 15:00:00	28.419	28.171	28.295	27.308		27.308
2015-09-21	15:15:00	2015-09-21 15:15:00	28.122	27.924	28.023	27.112		27.112
2015-09-21	15:30:00	2015-09-21 15:30:00	27.53	27.308	27.419	27.136		27.136
2015-09-21	15:45:00	2015-09-21 15:45:00	27.382	27.186	27.284	27.161		27.161
2015-09-21	16:00:00	2015-09-21 16:00:00	27.235	27.014	27.1245	27.038		27.038
2015-09-21	16:15:00	2015-09-21 16:15:00	27.014	26.793	26.9035	26.916		26.916
2015-09-21	16:30:00	2015-09-21 16:30:00	27.014	26.793	26.9035	26.916		26.916
2015-09-21	16:45:00	2015-09-21 16:45:00	27.063	26.867	26.965	26.94		26.94
2015-09-21	17:00:00	2015-09-21 17:00:00	27.112	26.891	27.0015	26.965		26.965
2015-09-21	17:15:00	2015-09-21 17:15:00	27.161	26.94	27.0505	26.989		26.989
2015-09-21	17:30:00	2015-09-21 17:30:00	27.136	26.916	27.026	26.989		26.989
2015-09-21	17:45:00	2015-09-21 17:45:00	27.112	26.891	27.0015	26.989		26.989
2015-09-21	18:00:00	2015-09-21 18:00:00	27.136	26.891	27.0135	27.014		27.014
2015-09-21	18:15:00	2015-09-21 18:15:00	27.136	26.916	27.026	27.038		27.038
2015-09-21	18:30:00	2015-09-21 18:30:00	27.136	26.916	27.026	27.038		27.038
2015-09-21	18:45:00	2015-09-21 18:45:00	27.136	26.916	27.026	27.038		27.038
2015-09-21	19:00:00	2015-09-21 19:00:00	27.136	26.891	27.0135	27.038		27.038
2015-09-21	19:15:00	2015-09-21 19:15:00	27.087	26.867	26.977	26.989		26.989
2015-09-21	19:30:00	2015-09-21 19:30:00	27.087	26.867	26.977	26.965		26.965
2015-09-21	19:45:00	2015-09-21 19:45:00	27.087	26.842	26.9645	26.965		26.965
2015-09-21	20:00:00	2015-09-21 20:00:00	27.087	26.867	26.977	26.989		26.989
2015-09-21	20:15:00	2015-09-21 20:15:00	27.087	26.867	26.977	27.014		27.014
2015-09-21	20:30:00	2015-09-21 20:30:00	27.087	26.867	26.977	27.038		27.038
2015-09-21	20:45:00	2015-09-21 20:45:00	27.063	26.842	26.9525	27.014		27.014
2015-09-21	21:00:00	2015-09-21 21:00:00	27.063	26.842	26.9525	27.014		27.014
2015-09-21	21:15:00	2015-09-21 21:15:00	27.038	26.818	26.928	27.014		27.014
2015-09-21	21:30:00	2015-09-21 21:30:00	26.989	26.769	26.879	27.014		27.014
2015-09-21	21:45:00	2015-09-21 21:45:00	26.94	26.72	26.83	26.989		26.989
2015-09-21	22:00:00	2015-09-21 22:00:00	26.94	26.695	26.8175	26.989		26.989
2015-09-21	22:15:00	2015-09-21 22:15:00	26.94	26.695	26.8175	26.965		26.965
2015-09-21	22:30:00	2015-09-21 22:30:00	26.867	26.671	26.769	26.965		26.965
2015-09-21	22:45:00	2015-09-21 22:45:00	26.842	26.646	26.744	26.989		26.989
2015-09-21	23:00:00	2015-09-21 23:00:00	26.818	26.622	26.72	27.014		27.014
2015-09-21	23:15:00	2015-09-21 23:15:00	26.818	26.598	26.708	27.038		27.038
2015-09-21	23:30:00	2015-09-21 23:30:00	26.818	26.598	26.708	27.038		27.038
2015-09-21	23:45:00	2015-09-21 23:45:00	26.818	26.573	26.6955	27.038		27.038
2015-09-22	00:00:00	2015-09-22	26.793	26.549	26.671	27.038		27.038
2015-09-22	00:15:00	2015-09-22 00:15:00	26.769	26.549	26.659	27.038		27.038
2015-09-22	00:30:00	2015-09-22 00:30:00	26.769	26.549	26.659	26.94		26.94
2015-09-22	00:45:00	2015-09-22 00:45:00	26.867	26.695	26.781	26.916		26.916
2015-09-22	01:00:00	2015-09-22 01:00:00	27.087	26.867	26.977	26.891		26.891
2015-09-22	01:15:00	2015-09-22 01:15:00	27.136	26.916	27.026	26.793		26.793
2015-09-22	01:30:00	2015-09-22 01:30:00	27.112	26.867	26.9895	26.793		26.793
2015-09-22	01:45:00	2015-09-22 01:45:00	27.014	26.793	26.9035	26.891		26.891
2015-09-22	02:00:00	2015-09-22 02:00:00	26.989	26.769	26.879	26.916		26.916
2015-09-22	02:15:00	2015-09-22 02:15:00	26.989	26.769	26.879	26.916		26.916
2015-09-22	02:30:00	2015-09-22 02:30:00	26.989	26.744	26.8665	26.916		26.916
2015-09-22	02:45:00	2015-09-22 02:45:00	26.989	26.769	26.879	26.891		26.891
2015-09-22	03:00:00	2015-09-22 03:00:00	26.94	26.72	26.83	26.891		26.891
2015-09-22	03:15:00	2015-09-22 03:15:00	26.94	26.72	26.83	26.891		26.891
2015-09-22	03:30:00	2015-09-22 03:30:00	26.989	26.769	26.879	26.94		26.94
2015-09-22	03:45:00	2015-09-22 03:45:00	27.038	26.818	26.928	26.94		26.94
2015-09-22	04:00:00	2015-09-22 04:00:00	27.112	26.891	27.0015	27.014		27.014
2015-09-22	04:15:00	2015-09-22 04:15:00	27.112	26.891	27.0015	27.038		27.038
2015-09-22	04:30:00	2015-09-22 04:30:00	27.112	26.867	26.9895	26.965		26.965
2015-09-22	04:45:00	2015-09-22 04:45:00	27.014	26.793	26.9035	26.891		26.891
2015-09-22	05:00:00	2015-09-22 05:00:00	26.965	26.744	26.8545	26.891		26.891
2015-09-22	05:15:00	2015-09-22 05:15:00	26.965	26.744	26.8545	26.891		26.891
2015-09-22	05:30:00	2015-09-22 05:30:00	26.965	26.744	26.8545	26.891		26.891
2015-09-22	05:45:00	2015-09-22 05:45:00	26.965	26.744	26.8545	26.891		26.891
2015-09-22	06:00:00	2015-09-22 06:00:00	26.989	26.744	26.8665	26.916		26.916
2015-09-22	06:15:00	2015-09-22 06:15:00	26.989	26.744	26.8665	26.891		26.891
2015-09-22	06:30:00	2015-09-22 06:30:00	26.965	26.744	26.8545	26.891		26.891
[truncated: 127,199 more rows]

## Sheet: average temp and stdev
Mean temperature and standard deviation across the entire study period (2015 - 2019)
Pivot table
Average temperature intertidal	Average temperature subtidal	Stdev of ITAvg	Stdev of STAvg
28.5977	28.6645	2.58002	2.49922

## Sheet: daily temp range - calculations
Date	Quarter	Month	Week	Day	IT1	IT1 Mean	IT1 Max	IT1 Min	IT1 Difference		IT2	IT2 Mean	IT2 Max	IT2 Min	IT2 Difference		IT avg		ST1	ST1 Mean	ST1 Max	ST1 Min	ST1 Difference		ST2	ST2 Mean	ST2 Max	ST2 Min	ST2 Difference		ST avg
2015-09-01	Q3	9	36	244	2015-09-01	25.4989	27.1245	22.3935	4.731						0		4.731
2015-09-02	Q3	9	36	245	2015-09-02	26.141	29.552	23.9655	5.5865						0		5.5865			26.0515	27.161	24.388	2.773						0		2.773
2015-09-03	Q3	9	36	246	2015-09-03	26.2495	31.1155	23.8815	7.234						0		7.234			26.2178	28.419	25.04	3.379						0		3.379
2015-09-04	Q3	9	36	247	2015-09-04	26.3391	30.71	24.8225	5.8875						0		5.8875			26.1808	27.85	24.992	2.858						0		2.858
2015-09-05	Q3	9	36	248	2015-09-05	26.4508	30.6335	24.859	5.7745						0		5.7745			26.2454	27.776	25.21	2.566						0		2.566
2015-09-06	Q3	9	37	249	2015-09-06	26.5745	30.066	24.907	5.159						0		5.159			26.3633	27.85	25.525	2.325						0		2.325
2015-09-07	Q3	9	37	250	2015-09-07	26.6186	29.0655	25.2705	3.795						0		3.795			26.3622	27.259	25.695	1.564						0		1.564
2015-09-08	Q3	9	37	251	2015-09-08	26.6752	28.4065	25.9025	2.504						0		2.504			26.5461	27.628	25.987	1.641						0		1.641
2015-09-09	Q3	9	37	252	2015-09-09	26.5402	27.4685	26.109	1.3595						0		1.3595			26.4534	27.014	26.012	1.002						0		1.002
2015-09-10	Q3	9	37	253	2015-09-10	26.414	27.0755	25.6225	1.453						0		1.453			26.5009	26.965	26.134	0.831						0		0.831
2015-09-11	Q3	9	37	254	2015-09-11	26.1458	26.6835	24.944	1.7395						0		1.7395			26.3053	26.695	25.695	1						0		1
2015-09-12	Q3	9	37	255	2015-09-12	26.28	26.9645	24.581	2.3835						0		2.3835			26.4454	26.965	25.574	1.391						0		1.391
2015-09-13	Q3	9	38	256	2015-09-13	26.3572	26.977	24.907	2.07						0		2.07			26.4519	27.038	25.574	1.464						0		1.464
2015-09-14	Q3	9	38	257	2015-09-14	26.4412	27.579	24.944	2.635						0		2.635			26.4946	27.161	25.671	1.49						0		1.49
2015-09-15	Q3	9	38	258	2015-09-15	26.4936	28.357	25.101	3.256						0		3.256			26.5141	27.284	25.623	1.661						0		1.661
2015-09-16	Q3	9	38	259	2015-09-16	26.3875	27.444	25.198	2.246						0		2.246			26.4328	26.916	25.768	1.148						0		1.148
2015-09-17	Q3	9	38	260	2015-09-17	26.4509	28.3445	25.61	2.7345						0		2.7345			26.464	27.087	26.036	1.051						0		1.051
2015-09-18	Q3	9	38	261	2015-09-18	26.8752	31.3955	25.829	5.5665						0		5.5665			26.6935	27.949	26.036	1.913						0		1.913
2015-09-19	Q3	9	38	262	2015-09-19	27.202	32.6	26.1945	6.4055						0		6.4055			26.8961	28.295	26.304	1.991						0		1.991
2015-09-20	Q3	9	39	263	2015-09-20	27.404	32.356	26.4635	5.8925						0		5.8925			27.078	28.642	26.622	2.02						0		2.02
2015-09-21	Q3	9	39	264	2015-09-21	27.4839	30.811	26.402	4.409						0		4.409			27.2488	28.742	26.793	1.949						0		1.949
2015-09-22	Q3	9	39	265	2015-09-22	27.5468	30.3685	26.585	3.7835						0		3.7835			27.2601	28.32	26.793	1.527						0		1.527
2015-09-23	Q3	9	39	266	2015-09-23	27.4062	29.2895	26.402	2.8875						0		2.8875			27.279	28.742	26.475	2.267						0		2.267
2015-09-24	Q3	9	39	267	2015-09-24	27.4032	28.8285	26.634	2.1945						0		2.1945			27.2128	27.949	26.573	1.376						0		1.376
2015-09-25	Q3	9	39	268	2015-09-25	27.083	28.295	26.0975	2.1975						0		2.1975			27.0493	27.702	25.72	1.982						0		1.982
2015-09-26	Q3	9	39	269	2015-09-26	27.0113	27.739	26.341	1.398						0		1.398			27.0711	27.53	26.622	0.908						0		0.908
2015-09-27	Q3	9	40	270	2015-09-27	27.0106	27.628	25.4405	2.1875						0		2.1875			27.073	27.579	26.207	1.372						0		1.372
2015-09-28	Q3	9	40	271	2015-09-28	27.1022	27.8005	25.647	2.1535						0		2.1535			27.1525	27.85	26.207	1.643						0		1.643
2015-09-29	Q3	9	40	272	2015-09-29	27.2615	29.315	25.562	3.753						0		3.753			27.2743	28.048	26.304	1.744						0		1.744
2015-09-30	Q3	9	40	273	2015-09-30	27.3036	29.803	25.428	4.375						0		4.375			27.3037	28.394	26.012	2.382						0		2.382
2015-10-01	Q4	10	40	274	2015-10-01	27.675	32.9755	26.012	6.9635						0		6.9635			27.5138	30.95	26.451	4.499						0		4.499
2015-10-02	Q4	10	40	275	2015-10-02	27.8243	32.7555	26.085	6.6705						0		6.6705			27.6405	30.217	26.769	3.448						0		3.448
2015-10-03	Q4	10	40	276	2015-10-03	27.9925	33.666	26.463	7.203						0		7.203			27.6924	29.715	26.891	2.824						0		2.824
2015-10-04	Q4	10	41	277	2015-10-04	28.2301	33.4045	26.6095	6.795						0		6.795			27.9374	29.49	26.989	2.501						0		2.501
2015-10-05	Q4	10	41	278	2015-10-05	28.0851	30.849	27.026	3.823						0		3.823			27.9379	29.165	27.456	1.709						0		1.709
2015-10-06	Q4	10	41	279	2015-10-06	28.1765	30.6335	26.9525	3.681						0		3.681			28.0602	29.439	27.235	2.204						0		2.204
2015-10-07	Q4	10	41	280	2015-10-07	28.1844	29.4525	27.456	1.9965						0		1.9965			28.0914	29.19	27.382	1.808						0		1.808
2015-10-08	Q4	10	41	281	2015-10-08	28.1041	29.0155	27.6405	1.375						0		1.375			28.0484	28.841	27.554	1.287						0		1.287
2015-10-09	Q4	10	41	282	2015-10-09	28.0351	28.667	27.505	1.162						0		1.162			28.0617	28.543	27.751	0.792						0		0.792
2015-10-10	Q4	10	41	283	2015-10-10	28.0475	28.5305	27.6405	0.89						0		0.89			28.1114	28.518	27.825	0.693						0		0.693
2015-10-11	Q4	10	42	284	2015-10-11	28.0643	28.667	27.3945	1.2725						0		1.2725			28.1759	28.642	27.628	1.014						0		1.014
2015-10-12	Q4	10	42	285	2015-10-12	28.2911	29.0525	27.542	1.5105						0		1.5105			28.3472	29.115	27.974	1.141						0		1.141
2015-10-13	Q4	10	42	286	2015-10-13	28.4	30.142	27.4315	2.7105						0		2.7105			28.398	29.265	27.85	1.415						0		1.415
2015-10-14	Q4	10	42	287	2015-10-14	28.3524	29.5145	27.3205	2.194						0		2.194			28.3925	28.965	27.825	1.14						0		1.14
2015-10-15	Q4	10	42	288	2015-10-15	28.6681	32.1375	27.591	4.5465						0		4.5465			28.5881	29.54	28.147	1.393						0		1.393
2015-10-16	Q4	10	42	289	2015-10-16	28.9925	33.535	27.801	5.734						0		5.734			28.8059	30.066	28.394	1.672						0		1.672
2015-10-17	Q4	10	42	290	2015-10-17	29.0673	32.833	27.9365	4.8965						0		4.8965			28.9589	30.444	28.295	2.149						0		2.149
2015-10-18	Q4	10	43	291	2015-10-18	29.0998	32.497	28.159	4.338						0		4.338			29.0224	30.394	28.295	2.099						0		2.099
2015-10-19	Q4	10	43	292	2015-10-19	29.3078	33.365	28.258	5.107						0		5.107			29.1274	30.646	28.493	2.153						0		2.153
2015-10-20	Q4	10	43	293	2015-10-20	29.4773	32.9755	28.4315	4.544						0		4.544			29.288	30.596	28.617	1.979						0		1.979
2015-10-21	Q4	10	43	294	2015-10-21	29.6381	32.652	28.5305	4.1215						0		4.1215			29.4866	30.748	28.791	1.957						0		1.957
2015-10-22	Q4	10	43	295	2015-10-22	29.69	31.957	28.878	3.079						0		3.079			29.6461	30.773	28.99	1.783						0		1.783
2015-10-23	Q4	10	43	296	2015-10-23	29.5825	31.1665	28.978	2.1885						0		2.1885			29.5756	30.394	29.09	1.304						0		1.304
2015-10-24	Q4	10	43	297	2015-10-24	29.4494	30.5575	28.9405	1.617						0		1.617			29.409	30.016	28.965	1.051						0		1.051
2015-10-25	Q4	10	44	298	2015-10-25	29.3198	29.991	28.6795	1.3115						0		1.3115			29.3735	29.84	29.015	0.825						0		0.825
2015-10-26	Q4	10	44	299	2015-10-26	29.3613	30.029	28.754	1.275						0		1.275			29.4579	30.041	29.165	0.876						0		0.876
2015-10-27	Q4	10	44	300	2015-10-27	29.3674	29.991	28.4315	1.5595						0		1.5595			29.4043	29.715	28.816	0.899						0		0.899
2015-10-28	Q4	10	44	301	2015-10-28	29.5793	31.7015	28.555	3.1465						0		3.1465			29.5585	30.268	28.916	1.352						0		1.352
2015-10-29	Q4	10	44	302	2015-10-29	29.7293	32.705	28.4685	4.2365						0		4.2365			29.7526	31.612	29.09	2.522						0		2.522
2015-10-30	Q4	10	44	303	2015-10-30	29.8732	33.587	28.692	4.895						0		4.895			29.8511	32.458	29.215	3.243						0		3.243
2015-10-31	Q4	10	44	304	2015-10-31	30.1363	35.0765	28.779	6.2975						0		6.2975			29.9804	32.484	29.439	3.045						0		3.045
2015-11-01	Q4	11	45	305	2015-11-01	30.1373	34.282	29.14	5.142						0		5.142			30.0636	31.74	29.49	2.25						0		2.25
2015-11-02	Q4	11	45	306	2015-11-02	30.2088	33.144	29.3145	3.8295						0		3.8295			30.1019	31.255	29.565	1.69						0		1.69
2015-11-03	Q4	11	45	307	2015-11-03	30.3232	33.0145	29.2275	3.787						0		3.787			30.1624	31.331	29.59	1.741						0		1.741
2015-11-04	Q4	11	45	308	2015-11-04	30.4674	32.9625	29.5145	3.448						0		3.448			30.4276	31.944	29.69	2.254						0		2.254
2015-11-05	Q4	11	45	309	2015-11-05	30.4307	32.0215	29.7525	2.269						0		2.269			30.4123	31.433	29.765	1.668						0		1.668
2015-11-06	Q4	11	45	310	2015-11-06	30.3392	31.408	29.8025	1.6055						0		1.6055			30.3003	30.849	29.84	1.009						0		1.009
2015-11-07	Q4	11	45	311	2015-11-07	30.1587	31.077	29.4025	1.6745						0		1.6745			30.1476	30.571	29.565	1.006						0		1.006
2015-11-08	Q4	11	46	312	2015-11-08	29.8722	30.4065	29.115	1.2915						0		1.2915			29.9845	30.293	29.315	0.978						0		0.978
2015-11-09	Q4	11	46	313	2015-11-09	29.8215	30.293	28.841	1.452						0		1.452			29.915	30.268	29.215	1.053						0		1.053
2015-11-10	Q4	11	46	314	2015-11-10	29.7802	30.495	28.5805	1.9145						0		1.9145			29.8928	30.469	29.165	1.304						0		1.304
2015-11-11	Q4	11	46	315	2015-11-11	29.8776	30.8875	28.6545	2.233						0		2.233			29.9741	30.773	29.34	1.433						0		1.433
2015-11-12	Q4	11	46	316	2015-11-12	29.971	31.6385	28.891	2.7475						0		2.7475			30.0344	30.824	29.29	1.534						0		1.534
2015-11-13	Q4	11	46	317	2015-11-13	30.1258	32.6015	28.9035	3.698						0		3.698			30.1299	31.052	29.515	1.537						0		1.537
2015-11-14	Q4	11	46	318	2015-11-14	30.4414	33.862	29.4775	4.3845						0		4.3845			30.4035	31.816	29.815	2.001						0		2.001
2015-11-15	Q4	11	47	319	2015-11-15	30.5411	33.7305	29.3645	4.366						0		4.366			30.4996	31.791	29.54	2.251						0		2.251
2015-11-16	Q4	11	47	320	2015-11-16	30.6822	35.142	29.69	5.452						0		5.452			30.5102	32.124	29.665	2.459						0		2.459
2015-11-17	Q4	11	47	321	2015-11-17	30.8608	36.378	29.327	7.051						0		7.051			30.5711	32.33	29.941	2.389						0		2.389
2015-11-18	Q4	11	47	322	2015-11-18	31.0293	36.3775	29.778	6.5995						0		6.5995			30.6615	32.33	29.991	2.339						0		2.339
2015-11-19	Q4	11	47	323	2015-11-19	31.0827	34.638	29.5025	5.1355						0		5.1355			30.8709	32.407	29.84	2.567						0		2.567
2015-11-20	Q4	11	47	324	2015-11-20	31.1299	34.124	30.0665	4.0575						0		4.0575			30.9827	32.458	30.343	2.115						0		2.115
2015-11-21	Q4	11	47	325	2015-11-21	31.0605	33.157	30.356	2.801						0		2.801			30.974	32.304	30.293	2.011						0		2.011
2015-11-22	Q4	11	48	326	2015-11-22	30.9826	32.394	30.1545	2.2395						0		2.2395			30.9674	31.816	30.243	1.573						0		1.573
2015-11-23	Q4	11	48	327	2015-11-23	30.9829	31.8675	30.394	1.4735						0		1.4735			31.0377	31.561	30.646	0.915						0		0.915
2015-11-24	Q4	11	48	328	2015-11-24	30.8283	31.548	29.9655	1.5825						0		1.5825			30.9172	31.382	30.621	0.761						0		0.761
2015-11-25	Q4	11	48	329	2015-11-25	30.8113	31.4205	29.9905	1.43						0		1.43			30.8764	31.408	30.091	1.317						0		1.317
2015-11-26	Q4	11	48	330	2015-11-26	30.8972	32.099	29.8025	2.2965						0		2.2965			30.9568	31.637	30.066	1.571						0		1.571
2015-11-27	Q4	11	48	331	2015-11-27	31.1312	33.849	29.815	4.034						0		4.034			31.1242	32.073	30.369	1.704						0		1.704
2015-11-28	Q4	11	48	332	2015-11-28	31.3014	34.5995	29.9535	4.646						0		4.646			31.2793	32.794	30.469	2.325						0		2.325
2015-11-29	Q4	11	49	333	2015-11-29	31.525	36.338	30.041	6.297						0		6.297			31.391	33.521	30.545	2.976						0		2.976
2015-11-30	Q4	11	49	334	2015-11-30	31.6514	36.201	30.3185	5.8825						0		5.8825			31.4986	33.391	30.773	2.618						0		2.618
2015-12-01	Q4	12	49	335	2015-12-01	31.7233	36.173	30.1295	6.0435						0		6.0435			31.4588	33.261	30.596	2.665						0		2.665
2015-12-02	Q4	12	49	336	2015-12-02	31.6681	36.2685	30.1545	6.114						0		6.114			31.3776	32.717	30.596	2.121						0		2.121
2015-12-03	Q4	12	49	337	2015-12-03	31.6206	34.797	30.3055	4.4915						0		4.4915			31.3601	32.639	30.545	2.094						0		2.094
2015-12-04	Q4	12	49	338	2015-12-04	31.7219	34.4925	30.6465	3.846						0		3.846			31.5806	32.975	30.824	2.151						0		2.151
2015-12-05	Q4	12	49	339	2015-12-05	31.689	33.092	30.9885	2.1035						0		2.1035			31.6662	32.82	31.026	1.794						0		1.794
2015-12-06	Q4	12	50	340	2015-12-06	31.6426	32.7555	31.052	1.7035						0		1.7035			31.5896	32.407	31.026	1.381						0		1.381
2015-12-07	Q4	12	50	341	2015-12-07	31.5059	32.497	30.76	1.737						0		1.737			31.5314	32.355	31.001	1.354						0		1.354
2015-12-08	Q4	12	50	342	2015-12-08	31.4629	32.2915	30.811	1.4805						0		1.4805			31.4946	32.047	31.103	0.944						0		0.944
2015-12-09	Q4	12	50	343	2015-12-09	31.2462	31.8935	30.079	1.8145						0		1.8145			31.3758	31.842	30.849	0.993						0		0.993
2015-12-10	Q4	12	50	344	2015-12-10	31.3324	31.7395	30.419	1.3205						0		1.3205			31.4373	31.689	31.052	0.637						0		0.637
2015-12-11	Q4	12	50	345	2015-12-11	31.6366	32.9755	30.9505	2.025						0		2.025			31.6681	32.278	31.23	1.048						0		1.048
2015-12-12	Q4	12	50	346	2015-12-12	31.6118	32.7165	30.773	1.9435						0		1.9435			31.6905	32.458	31.179	1.279						0		1.279
2015-12-13	Q4	12	51	347	2015-12-13	31.8759	35.45	30.7605	4.6895						0		4.6895			31.8149	32.898	31.179	1.719						0		1.719
2015-12-14	Q4	12	51	348	2015-12-14	32.0915	36.4725	30.887	5.5855						0		5.5855			31.9814	33.652	31.204	2.448						0		2.448
2015-12-15	Q4	12	51	349	2015-12-15	32.0646	36.0255	30.6845	5.341						0		5.341			31.958	33.443	31.23	2.213						0		2.213
2015-12-16	Q4	12	51	350	2015-12-16	32.3056	38.0895	30.7985	7.291						0		7.291			31.9965	33.73	31.204	2.526						0		2.526
2015-12-17	Q4	12	51	351	2015-12-17	32.3574	37.852	31.204	6.648						0		6.648			32.0468	33.835	31.026	2.809						0		2.809
2015-12-18	Q4	12	51	352	2015-12-18	32.1937	35.502	30.9635	4.5385						0		4.5385			32.0037	33.287	31.331	1.956						0		1.956
2015-12-19	Q4	12	51	353	2015-12-19	31.8785	33.5865	31.052	2.5345						0		2.5345			31.8014	32.665	31.23	1.435						0		1.435
2015-12-20	Q4	12	52	354	2015-12-20	31.6242	33.274	30.4065	2.8675						0		2.8675			31.5863	32.51	30.722	1.788						0		1.788
2015-12-21	Q4	12	52	355	2015-12-21	31.3983	32.885	30.117	2.768						0		2.768			31.3638	32.098	30.394	1.704						0		1.704
2015-12-22	Q4	12	52	356	2015-12-22	31.0471	31.906	29.64	2.266						0		2.266			31.0751	31.51	30.217	1.293						0		1.293
2015-12-23	Q4	12	52	357	2015-12-23	30.7226	31.37	29.6525	1.7175						0		1.7175			30.8171	31.281	30.117	1.164						0		1.164
2015-12-24	Q4	12	52	358	2015-12-24	30.55	31.2045	29.3025	1.902						0		1.902			30.7063	31.128	30.016	1.112						0		1.112
2015-12-25	Q4	12	52	359	2015-12-25	30.1466	30.76	28.642	2.118						0		2.118			30.3241	30.824	29.389	1.435						0		1.435
2015-12-26	Q4	12	52	360	2015-12-26	30.1842	30.989	28.742	2.247						0		2.247			30.264	30.621	29.29	1.331						0		1.331
2015-12-27	Q4	12	53	361	2015-12-27	30.4353	32.3685	28.891	3.4775						0		3.4775			30.4636	31.714	29.54	2.174						0		2.174
2015-12-28	Q4	12	53	362	2015-12-28	30.5134	31.996	29.3525	2.6435						0		2.6435			30.5227	31.077	29.79	1.287						0		1.287
2015-12-29	Q4	12	53	363	2015-12-29	30.6467	33.1445	28.953	4.1915						0		4.1915			30.6201	31.433	29.89	1.543						0		1.543
2015-12-30	Q4	12	53	364	2015-12-30	30.7177	33.8355	29.115	4.7205						0		4.7205			30.6078	31.561	29.515	2.046						0		2.046
2015-12-31	Q4	12	53	365	2015-12-31	30.7024	33.3	29.365	3.935						0		3.935			30.5704	31.484	29.54	1.944						0		1.944
2016-01-01	Q1	1	1	1	2016-01-01	30.7533	33.822	29.0405	4.7815						0		4.7815			30.5938	31.714	29.59	2.124						0		2.124
2016-01-02	Q1	1	1	2	2016-01-02	30.7191	33.118	29.2275	3.8905						0		3.8905			30.5867	31.637	29.565	2.072						0		2.072
2016-01-03	Q1	1	2	3	2016-01-03	30.7001	32.6905	29.39	3.3005						0		3.3005			30.5894	31.433	29.565	1.868						0		1.868
2016-01-04	Q1	1	2	4	2016-01-04	30.6083	32.06	29.6775	2.3825						0		2.3825			30.5364	31.179	29.865	1.314						0		1.314
2016-01-05	Q1	1	2	5	2016-01-05	30.5493	31.7525	29.6775	2.075						0		2.075			30.5278	31.103	29.715	1.388						0		1.388
2016-01-06	Q1	1	2	6	2016-01-06	30.5162	31.2425	29.527	1.7155						0		1.7155			30.5283	30.925	29.89	1.035						0		1.035
2016-01-07	Q1	1	2	7	2016-01-07	30.5942	31.103	29.928	1.175						0		1.175			30.6355	30.95	30.293	0.657						0		0.657
2016-01-08	Q1	1	2	8	2016-01-08	30.6364	31.217	29.84	1.377						0		1.377			30.7	30.925	30.419	0.506						0		0.506
2016-01-09	Q1	1	2	9	2016-01-09	30.4236	30.8995	28.5305	2.369						0		2.369			30.5826	30.9	30.016	0.884						0		0.884
2016-01-10	Q1	1	3	10	2016-01-10	30.8815	32.911	30.1795	2.7315						0		2.7315			30.9108	31.51	30.444	1.066						0		1.066
2016-01-11	Q1	1	3	11	2016-01-11	30.8595	32.5365	29.8905	2.646						0		2.646			30.9447	31.637	30.318	1.319						0		1.319
2016-01-12	Q1	1	3	12	2016-01-12	31.0794	32.6775	29.9535	2.724						0		2.724			31.0862	32.201	30.52	1.681						0		1.681
2016-01-13	Q1	1	3	13	2016-01-13	31.0951	35.226	29.722	5.504						0		5.504			30.9634	31.459	30.722	0.737						0		0.737
2016-01-14	Q1	1	3	14	2016-01-14	31.115	36.198	29.974	6.224						0		6.224												0
2016-01-15	Q1	1	3	15	2016-01-15	30.7858	32.534	29.697	2.837		2016-01-15	30.7684	32.456	29.705	2.751		2.794		2016-01-15	30.756	31.473	30.377	1.096						0		1.096
2016-01-16	Q1	1	3	16	2016-01-16	31.111	36.553	29.596	6.957		2016-01-16	31.1202	36.429	29.604	6.825		6.891		2016-01-16	30.7435	32.039	30.048	1.991						0		1.991
2016-01-17	Q1	1	4	17	2016-01-17	31.1184	35.927	29.646	6.281		2016-01-17	31.1198	35.753	29.68	6.073		6.177		2016-01-17	30.8736	32.401	30.124	2.277						0		2.277
2016-01-18	Q1	1	4	18	2016-01-18	31.1744	33.869	29.873	3.996		2016-01-18	31.1768	33.838	29.906	3.932		3.964		2016-01-18	30.9998	32.556	30.352	2.204						0		2.204
2016-01-19	Q1	1	4	19	2016-01-19	31.0319	32.82	30.278	2.542		2016-01-19	31.0422	32.767	30.285	2.482		2.512		2016-01-19	31.0239	32.608	30.453	2.155						0		2.155
2016-01-20	Q1	1	4	20	2016-01-20	30.7594	31.759	30.126	1.633		2016-01-20	30.7708	31.761	30.158	1.603		1.618		2016-01-20	30.8057	31.704	30.225	1.479						0		1.479
2016-01-21	Q1	1	4	21	2016-01-21	30.755	31.63	29.949	1.681		2016-01-21	30.7595	31.633	29.982	1.651		1.666		2016-01-21	30.835	31.499	30.352	1.147						0		1.147
2016-01-22	Q1	1	4	22	2016-01-22	30.573	31.092	29.798	1.294		2016-01-22	30.5858	31.071	29.856	1.215		1.2545		2016-01-22	30.6738	31.14	30.377	0.763						0		0.763
2016-01-23	Q1	1	4	23	2016-01-23	30.6294	31.169	30.05	1.119		2016-01-23	30.6448	31.198	30.108	1.09		1.1045		2016-01-23	30.711	31.396	30.251	1.145						0		1.145
2016-01-24	Q1	1	5	24	2016-01-24	30.3814	30.786	28.794	1.992		2016-01-24	30.3931	30.791	28.754	2.037		2.0145		2016-01-24	30.5684	30.809	30.149	0.66						0		0.66
2016-01-25	Q1	1	5	25	2016-01-25	30.5218	31.169	29.848	1.321		2016-01-25	30.5276	31.122	29.881	1.241		1.281		2016-01-25	30.5794	31.294	30.175	1.119						0		1.119
2016-01-26	Q1	1	5	26	2016-01-26	30.2336	30.608	28.944	1.664		2016-01-26	30.2544	30.639	28.979	1.66		1.662		2016-01-26	30.374	30.656	29.67	0.986						0		0.986
2016-01-27	Q1	1	5	27	2016-01-27	30.724	34.08	29.445	4.635		2016-01-27	30.7326	34.048	29.454	4.594		4.6145		2016-01-27	30.6719	31.987	30.225	1.762						0		1.762
2016-01-28	Q1	1	5	28	2016-01-28	30.5155	33.055	28.868	4.187		2016-01-28	30.5365	33.105	28.879	4.226		4.2065		2016-01-28	30.5279	31.55	29.922	1.628						0		1.628
2016-01-29	Q1	1	5	29	2016-01-29	30.4608	32.664	29.294	3.37		2016-01-29	30.4879	32.715	29.304	3.411		3.3905		2016-01-29	30.41	31.243	29.922	1.321						0		1.321
2016-01-30	Q1	1	5	30	2016-01-30	30.3429	32.56	29.169	3.391		2016-01-30	30.3611	32.638	29.153	3.485		3.438		2016-01-30	30.2572	31.038	29.67	1.368						0		1.368
2016-01-31	Q1	1	6	31	2016-01-31	30.0247	31.143	29.37	1.773		2016-01-31	30.0357	31.096	29.379	1.717		1.745		2016-01-31	29.9999	30.606	29.368	1.238						0		1.238
2016-02-01	Q1	2	6	32	2016-02-01	30.1403	32.249	28.944	3.305		2016-02-01	30.1568	32.224	28.954	3.27		3.2875		2016-02-01	30.056	31.192	29.168	2.024						0		2.024
2016-02-02	Q1	2	6	33	2016-02-02	30.266	32.094	29.069	3.025		2016-02-02	30.2758	32.044	29.103	2.941		2.983		2016-02-02	30.22	31.268	29.494	1.774						0		1.774
2016-02-03	Q1	2	6	34	2016-02-03	30.0898	30.964	29.37	1.594		2016-02-03	30.1077	30.969	29.404	1.565		1.5795		2016-02-03	30.1628	31.089	29.519	1.57						0		1.57
2016-02-04	Q1	2	6	35	2016-02-04	30.1895	31.322	29.42	1.902		2016-02-04	30.2063	31.351	29.429	1.922		1.912		2016-02-04	30.1728	31.192	29.268	1.924						0		1.924
2016-02-05	Q1	2	6	36	2016-02-05	30.1715	30.99	29.345	1.645		2016-02-05	30.1889	30.995	29.379	1.616		1.6305		2016-02-05	30.2378	31.038	29.594	1.444						0		1.444
2016-02-06	Q1	2	6	37	2016-02-06	30.161	30.659	29.445	1.214		2016-02-06	30.1794	30.664	29.454	1.21		1.212		2016-02-06	30.2548	30.656	29.897	0.759						0		0.759
2016-02-07	Q1	2	7	38	2016-02-07	30.2569	30.811	29.722	1.089		2016-02-07	30.2843	30.842	29.755	1.087		1.088		2016-02-07	30.303	30.784	30.048	0.736						0		0.736
2016-02-08	Q1	2	7	39	2016-02-08	30.4501	31.194	29.924	1.27		2016-02-08	30.4816	31.224	29.931	1.293		1.2815		2016-02-08	30.567	31.268	30.149	1.119						0		1.119
2016-02-09	Q1	2	7	40	2016-02-09	30.7019	32.482	30	2.482		2016-02-09	30.7354	32.741	30.032	2.709		2.5955		2016-02-09	30.7192	31.576	30.175	1.401						0		1.401
2016-02-10	Q1	2	7	41	2016-02-10	30.9148	34.664	29.596	5.068		2016-02-10	30.9523	34.789	29.579	5.21		5.139		2016-02-10	30.877	32.039	30.048	1.991						0		1.991
2016-02-11	Q1	2	7	42	2016-02-11	31.0011	33.448	29.848	3.6		2016-02-11	31.0376	33.628	29.881	3.747		3.6735		2016-02-11	30.9769	32.401	30.276	2.125						0		2.125
2016-02-12	Q1	2	7	43	2016-02-12	31.159	34.771	29.672	5.099		2016-02-12	31.1896	34.816	29.705	5.111		5.105		2016-02-12	31.111	32.868	30.023	2.845						0		2.845
2016-02-13	Q1	2	7	44	2016-02-13	31.1753	34.557	30	4.557		2016-02-13	31.197	34.656	30.032	4.624		4.5905		2016-02-13	31.0913	32.478	30.251	2.227						0		2.227
2016-02-14	Q1	2	8	45	2016-02-14	31.446	35.818	30.151	5.667		2016-02-14	31.4664	35.968	30.183	5.785		5.726		2016-02-14	31.2838	33.024	30.403	2.621						0		2.621
2016-02-15	Q1	2	8	46	2016-02-15	31.5646	35.36	30.126	5.234		2016-02-15	31.5791	35.323	30.133	5.19		5.212		2016-02-15	31.3893	32.816	30.377	2.439						0		2.439
2016-02-16	Q1	2	8	47	2016-02-16	31.5151	34.611	30.43	4.181		2016-02-16	31.5306	34.55	30.487	4.063		4.122		2016-02-16	31.4328	32.686	30.758	1.928						0		1.928
2016-02-17	Q1	2	8	48	2016-02-17	31.3802	33.212	30.202	3.01		2016-02-17	31.3869	33.157	30.234	2.923		2.9665		2016-02-17	31.3946	32.608	30.529	2.079						0		2.079
2016-02-18	Q1	2	8	49	2016-02-18	31.4157	32.586	30.633	1.953		2016-02-18	31.4236	32.612	30.639	1.973		1.963		2016-02-18	31.4814	32.608	30.58	2.028						0		2.028
2016-02-19	Q1	2	8	50	2016-02-19	31.1428	31.759	30.532	1.227		2016-02-19	31.155	31.761	30.436	1.325		1.276		2016-02-19	31.1935	31.73	30.631	1.099						0		1.099
2016-02-20	Q1	2	8	51	2016-02-20	30.9577	31.527	30.126	1.401		2016-02-20	30.9751	31.53	30.158	1.372		1.3865		2016-02-20	31.0184	31.601	30.403	1.198						0		1.198
2016-02-21	Q1	2	9	52	2016-02-21	30.9478	31.579	29.747	1.832		2016-02-21	30.9639	31.607	29.78	1.827		1.8295		2016-02-21	31.0472	31.473	30.656	0.817						0		0.817
2016-02-22	Q1	2	9	53	2016-02-22	31.0061	31.656	30.506	1.15		2016-02-22	31.0271	31.761	30.538	1.223		1.1865		2016-02-22	31.0902	31.499	30.758	0.741						0		0.741
2016-02-23	Q1	2	9	54	2016-02-23	31.1358	33.081	29.672	3.409		2016-02-23	31.1559	33.157	29.68	3.477		3.443		2016-02-23	31.1992	31.961	30.529	1.432						0		1.432
2016-02-24	Q1	2	9	55	2016-02-24	31.358	34.265	30.202	4.063		2016-02-24	31.3745	34.312	30.183	4.129		4.096		2016-02-24	31.3463	32.297	30.606	1.691						0		1.691
2016-02-25	Q1	2	9	56	2016-02-25	31.5075	35.71	30.151	5.559		2016-02-25	31.5192	35.672	30.158	5.514		5.5365		2016-02-25	31.4193	32.66	30.631	2.029						0		2.029
2016-02-26	Q1	2	9	57	2016-02-26	31.4845	34.106	30.659	3.447		2016-02-26	31.4983	34.048	30.639	3.409		3.428		2016-02-26	31.4637	32.53	31.089	1.441						0		1.441
2016-02-27	Q1	2	9	58	2016-02-27	31.1696	34.001	28.944	5.057		2016-02-27	31.1823	33.969	28.954	5.015		5.036		2016-02-27	31.2408	31.807	30.276	1.531						0		1.531
2016-02-28	Q1	2	10	59	2016-02-28	31.312	34.958	29.244	5.714		2016-02-28	31.3175	34.922	29.229	5.693		5.7035		2016-02-28	31.2361	32.452	30.251	2.201						0		2.201
2016-02-29	Q1	2	10	60	2016-02-29	31.4524	35.145	29.621	5.524		2016-02-29	31.4474	35.056	29.63	5.426		5.475		2016-02-29	31.3012	32.478	30.2	2.278						0		2.278
2016-03-01	Q1	3	10	61	2016-03-01	31.6854	34.958	30.532	4.426		2016-03-01	31.6875	34.896	30.588	4.308		4.367		2016-03-01	31.5272	32.998	30.86	2.138						0		2.138
2016-03-02	Q1	3	10	62	2016-03-02	31.8148	34.265	30.608	3.657		2016-03-02	31.8239	34.286	30.639	3.647		3.652		2016-03-02	31.7242	33.364	31.038	2.326						0		2.326
2016-03-03	Q1	3	10	63	2016-03-03	31.7518	33.264	30.862	2.402		2016-03-03	31.7538	33.209	30.867	2.342		2.372		2016-03-03	31.7657	33.417	31.243	2.174						0		2.174
2016-03-04	Q1	3	10	64	2016-03-04	31.6718	32.612	30.888	1.724		2016-03-04	31.6661	32.586	30.893	1.693		1.7085		2016-03-04	31.6973	32.634	30.962	1.672						0		1.672
2016-03-05	Q1	3	10	65	2016-03-05	31.5922	32.353	30.964	1.389		2016-03-05	31.5889	32.301	30.969	1.332		1.3605		2016-03-05	31.6146	32.065	30.987	1.078						0		1.078
2016-03-06	Q1	3	11	66	2016-03-06	31.4392	31.862	30.506	1.356		2016-03-06	31.4414	31.838	30.538	1.3		1.328		2016-03-06	31.5347	31.884	31.115	0.769						0		0.769
2016-03-07	Q1	3	11	67	2016-03-07	30.982	31.604	28.893	2.711		2016-03-07	30.9889	31.607	28.904	2.703		2.707		2016-03-07	31.1503	31.576	30.453	1.123						0		1.123
2016-03-08	Q1	3	11	68	2016-03-08	31.1402	31.656	30.557	1.099		2016-03-08	31.1457	31.633	30.563	1.07		1.0845		2016-03-08	31.2373	31.653	30.911	0.742						0		0.742
2016-03-09	Q1	3	11	69	2016-03-09	31.2756	31.862	30.329	1.533		2016-03-09	31.2851	31.889	30.335	1.554		1.5435		2016-03-09	31.333	31.91	30.758	1.152						0		1.152
2016-03-10	Q1	3	11	70	2016-03-10	31.5096	34.08	30.177	3.903		2016-03-10	31.5193	34.127	30.234	3.893		3.898		2016-03-10	31.4749	32.22	30.682	1.538						0		1.538
2016-03-11	Q1	3	11	71	2016-03-11	31.6153	34.186	30.075	4.111		2016-03-11	31.633	34.338	30.133	4.205		4.158		2016-03-11	31.605	32.764	30.58	2.184						0		2.184
2016-03-12	Q1	3	11	72	2016-03-12	31.6873	34.744	30.101	4.643		2016-03-12	31.6987	34.789	30.108	4.681		4.662		2016-03-12	31.6448	32.998	30.555	2.443						0		2.443
2016-03-13	Q1	3	12	73	2016-03-13	31.8766	35.981	30.151	5.83		2016-03-13	31.8859	35.941	30.158	5.783		5.8065		2016-03-13	31.7349	33.155	30.987	2.168						0		2.168
2016-03-14	Q1	3	12	74	2016-03-14	31.894	35.656	30.557	5.099		2016-03-14	31.9038	35.672	30.563	5.109		5.104		2016-03-14	31.7784	33.155	31.013	2.142						0		2.142
2016-03-15	Q1	3	12	75	2016-03-15	31.3228	31.991	30.481	1.51		2016-03-15	31.3345	31.992	30.512	1.48		1.495		2016-03-15	31.4547	32.168	30.936	1.232						0		1.232
2016-03-16	Q1	3	12	76	2016-03-16	31.5034	33.316	30.253	3.063		2016-03-16	31.5129	33.235	30.285	2.95		3.0065		2016-03-16	31.445	32.194	30.504	1.69						0		1.69
2016-03-17	Q1	3	12	77	2016-03-17	31.3339	32.768	30.05	2.718		2016-03-17	31.3425	32.741	30.057	2.684		2.701		2016-03-17	31.3365	32.065	30.555	1.51						0		1.51
2016-03-18	Q1	3	12	78	2016-03-18	31.0662	32.068	29.924	2.144		2016-03-18	31.0751	32.044	29.931	2.113		2.1285		2016-03-18	31.1071	31.653	30.149	1.504						0		1.504
2016-03-19	Q1	3	12	79	2016-03-19	30.824	31.373	29.823	1.55		2016-03-19	30.8381	31.377	29.856	1.521		1.5355		2016-03-19	30.8839	31.396	30.023	1.373						0		1.373
2016-03-20	Q1	3	13	80	2016-03-20	30.6193	31.066	29.395	1.671		2016-03-20	30.6371	31.071	29.479	1.592		1.6315		2016-03-20	30.7294	31.089	30.225	0.864						0		0.864
2016-03-21	Q1	3	13	81	2016-03-21	30.6079	31.041	29.37	1.671		2016-03-21	30.625	31.045	29.429	1.616		1.6435		2016-03-21	30.7267	31.115	30.327	0.788						0		0.788
2016-03-22	Q1	3	13	82	2016-03-22	30.7195	31.297	29.52	1.777		2016-03-22	30.741	31.351	29.604	1.747		1.762		2016-03-22	30.8902	31.294	30.555	0.739						0		0.739
2016-03-23	Q1	3	13	83	2016-03-23	30.9212	31.476	30.151	1.325		2016-03-23	30.9433	31.607	30.183	1.424		1.3745		2016-03-23	31.0079	31.524	30.529	0.995						0		0.995
2016-03-24	Q1	3	13	84	2016-03-24	31.1355	33.133	29.823	3.31		2016-03-24	31.1556	33.235	29.856	3.379		3.3445		2016-03-24	31.1756	31.936	30.327	1.609						0		1.609
2016-03-25	Q1	3	13	85	2016-03-25	31.2662	33.448	30.379	3.069		2016-03-25	31.2772	33.418	30.411	3.007		3.038		2016-03-25	31.2727	32.168	30.682	1.486						0		1.486
2016-03-26	Q1	3	13	86	2016-03-26	31.4179	33.658	30.126	3.532		2016-03-26	31.4365	33.759	30.108	3.651		3.5915		2016-03-26	31.3931	32.478	30.58	1.898						0		1.898
2016-03-27	Q1	3	14	87	2016-03-27	31.5263	34.744	30.025	4.719		2016-03-27	31.5435	34.816	30.032	4.784		4.7515		2016-03-27	31.5021	32.634	30.529	2.105						0		2.105
2016-03-28	Q1	3	14	88	2016-03-28	31.5979	35.306	30.101	5.205		2016-03-28	31.6157	35.457	30.133	5.324		5.2645		2016-03-28	31.5159	32.738	30.606	2.132						0		2.132
2016-03-29	Q1	3	14	89	2016-03-29	31.5775	34.744	30.278	4.466		2016-03-29	31.5957	34.869	30.31	4.559		4.5125		2016-03-29	31.5212	32.738	30.631	2.107						0		2.107
2016-03-30	Q1	3	14	90	2016-03-30	31.4839	33.658	29.924	3.734		2016-03-30	31.4977	33.759	29.957	3.802		3.768		2016-03-30	31.4863	32.712	30.733	1.979						0		1.979
2016-03-31	Q1	3	14	91	2016-03-31	31.545	33.553	30.202	3.351		2016-03-31	31.5628	33.654	30.234	3.42		3.3855		2016-03-31	31.5122	32.738	30.631	2.107						0		2.107
2016-04-01	Q2	4	14	92	2016-04-01	31.566	32.924	30.659	2.265		2016-04-01	31.5796	32.949	30.715	2.234		2.2495		2016-04-01	31.6005	33.051	30.962	2.089						0		2.089
2016-04-02	Q2	4	14	93	2016-04-02	31.4481	32.171	30.786	1.385		2016-04-02	31.4591	32.198	30.817	1.381		1.383		2016-04-02	31.4592	32.245	31.013	1.232						0		1.232
2016-04-03	Q2	4	15	94	2016-04-03	31.5259	32.456	30.939	1.517		2016-04-03	31.5342	32.456	30.944	1.512		1.5145		2016-04-03	31.4478	32.065	30.86	1.205						0		1.205
2016-04-04	Q2	4	15	95	2016-04-04	31.4757	32.223	30.557	1.666		2016-04-04	31.484	32.276	30.588	1.688		1.677		2016-04-04	31.5515	32.142	30.987	1.155						0		1.155
2016-04-05	Q2	4	15	96	2016-04-05	31.3353	31.81	30.608	1.202		2016-04-05	31.3459	31.787	30.639	1.148		1.175		2016-04-05	31.4431	31.858	31.064	0.794						0		0.794
2016-04-06	Q2	4	15	97	2016-04-06	31.1662	31.373	30.659	0.714		2016-04-06	31.1871	31.403	30.74	0.663		0.6885		2016-04-06	31.3185	31.422	30.758	0.664						0		0.664
2016-04-07	Q2	4	15	98	2016-04-07	31.6661	31.944	31.204	0.74		2016-04-07	31.5108	31.842	30.545	1.297		1.0185		2016-04-07	31.7451	32.021	31.281	0.74						0		0.74
2016-04-08	Q2	4	15	99	2016-04-08	31.6595	32.15	30.444	1.706		2016-04-08	31.5691	32.253	30.117	2.136		1.921		2016-04-08	31.7459	32.253	30.52	1.733						0		1.733
2016-04-09	Q2	4	15	100	2016-04-09	31.711	32.253	30.343	1.91		2016-04-09	31.6028	32.355	30.016	2.339		2.1245		2016-04-09	31.7955	32.355	30.469	1.886						0		1.886
2016-04-10	Q2	4	16	101	2016-04-10	31.6122	32.304	29.941	2.363		2016-04-10	31.4695	32.794	29.565	3.229		2.796		2016-04-10	31.6873	32.355	30.041	2.314						0		2.314
2016-04-11	Q2	4	16	102	2016-04-11	31.7714	32.924	30.571	2.353		2016-04-11	31.6861	35.022	29.966	5.056		3.7045		2016-04-11	31.8371	32.949	30.697	2.252						0		2.252
2016-04-12	Q2	4	16	103	2016-04-12	31.7704	32.898	30.621	2.277		2016-04-12	31.7699	35.102	30.167	4.935		3.606		2016-04-12	31.832	32.898	30.672	2.226						0		2.226
2016-04-13	Q2	4	16	104	2016-04-13	31.7776	32.924	30.925	1.999		2016-04-13	31.7075	33.757	30.469	3.288		2.6435		2016-04-13	31.8309	32.872	31.001	1.871						0		1.871
2016-04-14	Q2	4	16	105	2016-04-14	31.6116	32.665	30.697	1.968		2016-04-14	31.5305	33.157	29.941	3.216		2.592		2016-04-14	31.6707	32.665	30.773	1.892						0		1.892
2016-04-15	Q2	4	16	106	2016-04-15	31.5188	32.433	30.646	1.787		2016-04-15	31.3971	32.51	29.84	2.67		2.2285		2016-04-15	31.5779	32.458	30.748	1.71						0		1.71
2016-04-16	Q2	4	16	107	2016-04-16	31.3951	32.021	30.621	1.4		2016-04-16	31.2954	32.047	30.571	1.476		1.438		2016-04-16	31.4576	32.047	30.697	1.35						0		1.35
2016-04-17	Q2	4	17	108	2016-04-17	31.3133	31.868	30.419	1.449		2016-04-17	31.2374	32.021	30.293	1.728		1.5885		2016-04-17	31.3767	31.868	30.495	1.373						0		1.373
2016-04-18	Q2	4	17	109	2016-04-18	31.2922	31.74	30.824	0.916		2016-04-18	31.1506	31.586	30.52	1.066		0.991		2016-04-18	31.3617	31.765	30.874	0.891						0		0.891
2016-04-19	Q2	4	17	110	2016-04-19	31.1629	31.586	30.748	0.838		2016-04-19	31.0109	31.433	30.268	1.165		1.0015		2016-04-19	31.2346	31.612	30.798	0.814						0		0.814
2016-04-20	Q2	4	17	111	2016-04-20	31.1179	31.433	30.52	0.913		2016-04-20	30.9078	31.331	29.916	1.415		1.164		2016-04-20	31.1909	31.484	30.571	0.913						0		0.913
2016-04-21	Q2	4	17	112	2016-04-21	31.0795	31.484	30.419	1.065		2016-04-21	30.9011	31.382	30.016	1.366		1.2155		2016-04-21	31.1541	31.561	30.52	1.041						0		1.041
2016-04-22	Q2	4	17	113	2016-04-22	31.0365	31.408	30.243	1.165		2016-04-22	30.8716	31.382	29.765	1.617		1.391		2016-04-22	31.1146	31.433	30.318	1.115						0		1.115
2016-04-23	Q2	4	17	114	2016-04-23	31.136	31.612	30.495	1.117		2016-04-23	30.9844	31.51	29.765	1.745		1.431		2016-04-23	31.2096	31.689	30.571	1.118						0		1.118
2016-04-24	Q2	4	18	115	2016-04-24	31.1666	31.74	29.84	1.9		2016-04-24	30.9776	31.996	28.891	3.105		2.5025		2016-04-24	31.2441	31.816	29.916	1.9						0		1.9
2016-04-25	Q2	4	18	116	2016-04-25	31.0498	31.765	29.84	1.925		2016-04-25	30.9317	32.227	29.09	3.137		2.531		2016-04-25	31.1245	31.816	29.89	1.926						0		1.926
2016-04-26	Q2	4	18	117	2016-04-26	31.0557	31.919	29.79	2.129		2016-04-26	30.9119	32.768	28.99	3.778		2.9535		2016-04-26	31.1322	31.944	29.89	2.054						0		2.054
2016-04-27	Q2	4	18	118	2016-04-27	31.0137	31.868	29.89	1.978		2016-04-27	30.8886	32.717	29.165	3.552		2.765		2016-04-27	31.0846	31.919	29.941	1.978						0		1.978
2016-04-28	Q2	4	18	119	2016-04-28	30.935	31.791	29.815	1.976		2016-04-28	30.8523	32.433	29.565	2.868		2.422		2016-04-28	31.0052	31.868	29.916	1.952						0		1.952
2016-04-29	Q2	4	18	120	2016-04-29	30.9157	31.919	30.041	1.878		2016-04-29	30.8165	32.355	29.14	3.215		2.5465		2016-04-29	30.9833	31.893	30.016	1.877						0		1.877
2016-04-30	Q2	4	18	121	2016-04-30	30.8079	31.663	29.966	1.697		2016-04-30	30.706	31.842	29.09	2.752		2.2245		2016-04-30	30.877	31.637	30.041	1.596						0		1.596
2016-05-01	Q2	5	19	122	2016-05-01	30.8036	31.612	29.815	1.797		2016-05-01	30.7143	31.637	29.14	2.497		2.147		2016-05-01	30.8728	31.689	29.916	1.773						0		1.773
2016-05-02	Q2	5	19	123	2016-05-02	30.7813	31.408	30.066	1.342		2016-05-02	30.6913	31.51	29.715	1.795		1.5685		2016-05-02	30.8461	31.408	30.142	1.266						0		1.266
2016-05-03	Q2	5	19	124	2016-05-03	30.7245	31.255	30.117	1.138		2016-05-03	30.6265	31.357	29.665	1.692		1.415		2016-05-03	30.7952	31.281	30.217	1.064						0		1.064
2016-05-04	Q2	5	19	125	2016-05-04	30.7789	31.153	30.444	0.709		2016-05-04	30.6606	31.204	30.117	1.087		0.898		2016-05-04	30.8533	31.179	30.52	0.659						0		0.659
2016-05-05	Q2	5	19	126	2016-05-05	30.6924	30.925	30.394	0.531		2016-05-05	30.5188	30.824	29.74	1.084		0.8075		2016-05-05	30.7701	30.976	30.469	0.507						0		0.507
2016-05-06	Q2	5	19	127	2016-05-06	30.3846	30.748	29.464	1.284		2016-05-06	30.0614	30.646	28.345	2.301		1.7925		2016-05-06	30.4672	30.824	29.715	1.109						0		1.109
2016-05-07	Q2	5	19	128	2016-05-07	30.1529	30.444	29.389	1.055		2016-05-07	29.9934	30.343	28.866	1.477		1.266		2016-05-07	30.2309	30.545	29.464	1.081						0		1.081
2016-05-08	Q2	5	20	129	2016-05-08	30.1501	30.343	29.464	0.879		2016-05-08	30.0059	30.495	29.215	1.28		1.0795		2016-05-08	30.2283	30.419	29.59	0.829						0		0.829
2016-05-09	Q2	5	20	130	2016-05-09	29.4688	30.318	26.085	4.233		2016-05-09	28.9264	30.192	25.234	4.958		4.5955		2016-05-09	29.5505	30.394	26.426	3.968						0		3.968
2016-05-10	Q2	5	20	131	2016-05-10	28.4926	29.439	26.524	2.915		2016-05-10	27.9628	29.315	23.905	5.41		4.1625		2016-05-10	28.5674	29.515	26.598	2.917						0		2.917
2016-05-11	Q2	5	20	132	2016-05-11	27.7721	28.717	26.671	2.046		2016-05-11	27.4961	28.593	24.46	4.133		3.0895		2016-05-11	27.8517	28.791	26.72	2.071						0		2.071
2016-05-12	Q2	5	20	133	2016-05-12	27.5917	28.221	26.549	1.672		2016-05-12	27.4796	28.692	24.774	3.918		2.795		2016-05-12	27.6656	28.295	26.793	1.502						0		1.502
2016-05-13	Q2	5	20	134	2016-05-13	27.9057	28.891	26.475	2.416		2016-05-13	27.8948	29.565	25.137	4.428		3.422		2016-05-13	27.9676	28.916	26.573	2.343						0		2.343
2016-05-14	Q2	5	20	135	2016-05-14	28.4198	29.19	27.776	1.414		2016-05-14	28.3807	29.464	27.604	1.86		1.637		2016-05-14	28.4888	29.215	27.825	1.39						0		1.39
2016-05-15	Q2	5	21	136	2016-05-15	28.7957	29.49	28.147	1.343		2016-05-15	28.7051	29.59	27.825	1.765		1.554		2016-05-15	28.8606	29.49	28.196	1.294						0		1.294
2016-05-16	Q2	5	21	137	2016-05-16	28.8413	29.414	28.097	1.317		2016-05-16	28.7903	29.464	28.221	1.243		1.28		2016-05-16	28.9025	29.389	28.147	1.242						0		1.242
2016-05-17	Q2	5	21	138	2016-05-17	28.8468	29.34	28.171	1.169		2016-05-17	28.771	29.414	28.196	1.218		1.1935		2016-05-17	28.9098	29.315	28.245	1.07						0		1.07
2016-05-18	Q2	5	21	139	2016-05-18	28.8495	29.24	28.27	0.97		2016-05-18	28.732	29.14	27.974	1.166		1.068		2016-05-18	28.9184	29.24	28.419	0.821						0		0.821
2016-05-19	Q2	5	21	140	2016-05-19	28.7531	29.065	27.875	1.19		2016-05-19	28.5892	29.015	27.382	1.633		1.4115		2016-05-19	28.8278	29.14	28.072	1.068						0		1.068
2016-05-20	Q2	5	21	141	2016-05-20	28.8313	29.115	28.444	0.671		2016-05-20	28.7283	29.14	28.122	1.018		0.8445		2016-05-20	28.9024	29.165	28.493	0.672						0		0.672
2016-05-21	Q2	5	21	142	2016-05-21	28.904	29.215	28.419	0.796		2016-05-21	28.7257	29.19	27.825	1.365		1.0805		2016-05-21	28.9757	29.265	28.518	0.747						0		0.747
2016-05-22	Q2	5	22	143	2016-05-22	28.9519	29.315	28.245	1.07		2016-05-22	28.7593	29.315	27.136	2.179		1.6245		2016-05-22	29.0272	29.389	28.32	1.069						0		1.069
2016-05-23	Q2	5	22	144	2016-05-23	28.6317	29.24	26.818	2.422		2016-05-23	28.2915	29.14	24.847	4.293		3.3575		2016-05-23	28.7049	29.265	26.867	2.398						0		2.398
2016-05-24	Q2	5	22	145	2016-05-24	28.5482	29.115	27.53	1.585		2016-05-24	28.4206	29.165	26.94	2.225		1.905		2016-05-24	28.6163	29.14	27.604	1.536						0		1.536
2016-05-25	Q2	5	22	146	2016-05-25	28.629	29.14	27.85	1.29		2016-05-25	28.4804	29.14	27.284	1.856		1.573		2016-05-25	28.6934	29.09	27.949	1.141						0		1.141
2016-05-26	Q2	5	22	147	2016-05-26	28.7296	29.439	27.875	1.564		2016-05-26	28.6131	29.815	27.259	2.556		2.06		2016-05-26	28.8007	29.464	27.974	1.49						0		1.49
2016-05-27	Q2	5	22	148	2016-05-27	28.7899	29.464	27.899	1.565		2016-05-27	28.666	29.916	26.842	3.074		2.3195		2016-05-27	28.8541	29.515	27.949	1.566						0		1.566
2016-05-28	Q2	5	22	149	2016-05-28	28.817	29.565	27.875	1.69		2016-05-28	28.7389	30.091	26.989	3.102		2.396		2016-05-28	28.8741	29.54	27.949	1.591						0		1.591
2016-05-29	Q2	5	23	150	2016-05-29	28.9072	29.74	28.122	1.618		2016-05-29	28.853	30.545	27.407	3.138		2.378		2016-05-29	28.9671	29.74	28.196	1.544						0		1.544
2016-05-30	Q2	5	23	151	2016-05-30	28.9032	29.715	27.974	1.741		2016-05-30	28.8221	30.066	27.21	2.856		2.2985		2016-05-30	28.963	29.69	28.048	1.642						0		1.642
2016-05-31	Q2	5	23	152	2016-05-31	28.9655	29.59	28.245	1.345		2016-05-31	28.9033	30.016	27.677	2.339		1.842		2016-05-31	29.0257	29.615	28.32	1.295						0		1.295
2016-06-01	Q2	6	23	153	2016-06-01	29.0165	29.64	28.345	1.295		2016-06-01	28.9398	29.941	28.048	1.893		1.594		2016-06-01	29.0782	29.59	28.394	1.196						0		1.196
2016-06-02	Q2	6	23	154	2016-06-02	29.002	29.414	28.468	0.946		2016-06-02	28.8834	29.49	28.072	1.418		1.182		2016-06-02	29.0713	29.414	28.518	0.896						0		0.896
2016-06-03	Q2	6	23	155	2016-06-03	28.9902	29.365	28.617	0.748		2016-06-03	28.8682	29.414	28.171	1.243		0.9955		2016-06-03	29.0603	29.414	28.667	0.747						0		0.747
2016-06-04	Q2	6	23	156	2016-06-04	28.9104	29.215	28.32	0.895		2016-06-04	28.7263	29.165	27.628	1.537		1.216		2016-06-04	28.9839	29.265	28.419	0.846						0		0.846
2016-06-05	Q2	6	24	157	2016-06-05	28.9328	29.24	28.444	0.796		2016-06-05	28.7756	29.215	27.924	1.291		1.0435		2016-06-05	29.0059	29.265	28.518	0.747						0		0.747
2016-06-06	Q2	6	24	158	2016-06-06	28.9314	29.389	27.825	1.564		2016-06-06	28.7861	29.315	27.481	1.834		1.699		2016-06-06	29.0056	29.439	27.899	1.54						0		1.54
2016-06-07	Q2	6	24	159	2016-06-07	29.0106	29.464	28.147	1.317		2016-06-07	28.8544	29.565	26.842	2.723		2.02		2016-06-07	29.0834	29.54	28.196	1.344						0		1.344
2016-06-08	Q2	6	24	160	2016-06-08	28.4731	29.04	26.182	2.858		2016-06-08	27.7624	28.916	22.848	6.068		4.463		2016-06-08	28.5481	29.115	26.061	3.054						0		3.054
2016-06-09	Q2	6	24	161	2016-06-09	27.0262	28.27	25.04	3.23		2016-06-09	26.5042	28.171	21.843	6.328		4.779		2016-06-09	27.1112	28.369	25.162	3.207						0		3.207
2016-06-10	Q2	6	24	162	2016-06-10	26.4788	26.94	24.992	1.948		2016-06-10	26.256	27.333	23.256	4.077		3.0125		2016-06-10	26.5493	27.014	25.065	1.949						0		1.949
2016-06-11	Q2	6	24	163	2016-06-11	26.3083	26.818	25.21	1.608		2016-06-11	26.1699	26.867	24.195	2.672		2.14		2016-06-11	26.3735	26.891	25.089	1.802						0		1.802
2016-06-12	Q2	6	25	164	2016-06-12	26.508	27.014	25.671	1.343		2016-06-12	26.4105	27.431	24.919	2.512		1.9275		2016-06-12	26.578	27.087	25.647	1.44						0		1.44
2016-06-13	Q2	6	25	165	2016-06-13	26.1986	27.038	25.016	2.022		2016-06-13	26.2152	27.259	24.243	3.016		2.519		2016-06-13	26.2596	27.136	25.065	2.071						0		2.071
2016-06-14	Q2	6	25	166	2016-06-14	26.8421	27.579	26.182	1.397		2016-06-14	26.7793	27.554	26.109	1.445		1.421		2016-06-14	26.8969	27.554	26.256	1.298						0		1.298
2016-06-15	Q2	6	25	167	2016-06-15	27.1244	27.677	26.598	1.079		2016-06-15	27.0408	27.604	26.671	0.933		1.006		2016-06-15	27.1924	27.677	26.671	1.006						0		1.006
2016-06-16	Q2	6	25	168	2016-06-16	27.2014	27.677	26.769	0.908		2016-06-16	27.1313	27.677	26.671	1.006		0.957		2016-06-16	27.2689	27.702	26.842	0.86						0		0.86
2016-06-17	Q2	6	25	169	2016-06-17	27.3044	27.801	26.891	0.91		2016-06-17	27.2072	27.751	26.695	1.056		0.983		2016-06-17	27.3685	27.825	26.965	0.86						0		0.86
2016-06-18	Q2	6	25	170	2016-06-18	27.2537	27.505	26.695	0.81		2016-06-18	27.096	27.407	26.304	1.103		0.9565		2016-06-18	27.327	27.579	26.695	0.884						0		0.884
2016-06-19	Q2	6	26	171	2016-06-19	26.6111	27.308	25.574	1.734		2016-06-19	26.342	27.186	24.484	2.702		2.218		2016-06-19	26.6837	27.382	25.623	1.759						0		1.759
2016-06-20	Q2	6	26	172	2016-06-20	26.556	26.916	26.036	0.88		2016-06-20	26.3268	26.867	25.016	1.851		1.3655		2016-06-20	26.6257	26.989	26.061	0.928						0		0.928
2016-06-21	Q2	6	26	173	2016-06-21	26.7162	27.136	26.061	1.075		2016-06-21	26.55	27.063	25.283	1.78		1.4275		2016-06-21	26.7832	27.21	26.134	1.076						0		1.076
2016-06-22	Q2	6	26	174	2016-06-22	26.8447	27.333	25.963	1.37		2016-06-22	26.6876	27.259	25.428	1.831		1.6005		2016-06-22	26.9096	27.333	26.036	1.297						0		1.297
2016-06-23	Q2	6	26	175	2016-06-23	26.9457	27.505	26.134	1.371		2016-06-23	26.802	27.554	25.525	2.029		1.7		2016-06-23	27.0145	27.505	26.182	1.323						0		1.323
2016-06-24	Q2	6	26	176	2016-06-24	27.0418	27.481	26.28	1.201		2016-06-24	26.8978	27.604	25.695	1.909		1.555		2016-06-24	27.1108	27.604	26.353	1.251						0		1.251
2016-06-25	Q2	6	26	177	2016-06-25	27.1614	28.023	26.329	1.694		2016-06-25	27.0475	28.667	25.258	3.409		2.5515		2016-06-25	27.2267	28.048	26.378	1.67						0		1.67
2016-06-26	Q2	6	27	178	2016-06-26	27.0068	27.431	26.28	1.151		2016-06-26	26.8146	27.751	24.677	3.074		2.1125		2016-06-26	27.0796	27.554	26.353	1.201						0		1.201
2016-06-27	Q2	6	27	179	2016-06-27	26.5959	26.94	25.744	1.196		2016-06-27	26.4546	27.038	25.283	1.755		1.4755		2016-06-27	26.6634	26.989	26.012	0.977						0		0.977
2016-06-28	Q2	6	27	180	2016-06-28	26.558	27.284	25.695	1.589		2016-06-28	26.5521	28.072	25.38	2.692		2.1405		2016-06-28	26.6173	27.333	25.768	1.565						0		1.565
2016-06-29	Q2	6	27	181	2016-06-29	26.8591	27.554	26.378	1.176		2016-06-29	26.8466	28.27	26.109	2.161		1.6685		2016-06-29	26.9181	27.554	26.451	1.103						0		1.103
2016-06-30	Q2	6	27	182	2016-06-30	27.057	27.579	26.598	0.981		2016-06-30	27.0458	28.345	26.475	1.87		1.4255		2016-06-30	27.1186	27.628	26.646	0.982						0		0.982
2016-07-01	Q3	7	27	183	2016-07-01	27.1589	27.702	26.671	1.031		2016-07-01	27.1386	28.245	26.5	1.745		1.388		2016-07-01	27.2197	27.677	26.744	0.933						0		0.933
2016-07-02	Q3	7	27	184	2016-07-02	27.1826	27.505	26.842	0.663		2016-07-02	27.0783	27.53	26.646	0.884		0.7735		2016-07-02	27.2517	27.53	26.891	0.639						0		0.639
2016-07-03	Q3	7	28	185	2016-07-03	27.1811	27.456	26.573	0.883		2016-07-03	27.0256	27.333	25.963	1.37		1.1265		2016-07-03	27.2514	27.53	26.646	0.884						0		0.884
2016-07-04	Q3	7	28	186	2016-07-04	27.1871	27.407	26.793	0.614		2016-07-04	27.0296	27.407	26.231	1.176		0.895		2016-07-04	27.2583	27.456	26.867	0.589						0		0.589
2016-07-05	Q3	7	28	187	2016-07-05	27.2049	27.505	26.695	0.81		2016-07-05	27.0387	27.481	25.914	1.567		1.1885		2016-07-05	27.2722	27.579	26.744	0.835						0		0.835
2016-07-06	Q3	7	28	188	2016-07-06	27.2484	27.776	26.573	1.203		2016-07-06	27.1055	27.677	25.695	1.982		1.5925		2016-07-06	27.3184	27.776	26.646	1.13						0		1.13
2016-07-07	Q3	7	28	189	2016-07-07	27.2766	27.801	26.622	1.179		2016-07-07	27.1338	27.727	25.939	1.788		1.4835		2016-07-07	27.347	27.85	26.695	1.155						0		1.155
2016-07-08	Q3	7	28	190	2016-07-08	27.2915	27.974	26.524	1.45		2016-07-08	27.1925	28.717	26.012	2.705		2.0775		2016-07-08	27.3597	27.998	26.598	1.4						0		1.4
2016-07-09	Q3	7	28	191	2016-07-09	27.3677	28.171	26.598	1.573		2016-07-09	27.327	29.265	26.329	2.936		2.2545		2016-07-09	27.434	28.196	26.646	1.55						0		1.55
2016-07-10	Q3	7	29	192	2016-07-10	27.3249	27.801	26.793	1.008		2016-07-10	27.264	28.816	26.231	2.585		1.7965		2016-07-10	27.399	27.875	26.867	1.008						0		1.008
2016-07-11	Q3	7	29	193	2016-07-11	26.8809	27.21	26.451	0.759		2016-07-11	26.6698	27.087	25.453	1.634		1.1965		2016-07-11	26.9541	27.259	26.549	0.71						0		0.71
2016-07-12	Q3	7	29	194	2016-07-12	26.1848	26.744	25.477	1.267		2016-07-12	25.9291	26.622	24.388	2.234		1.7505		2016-07-12	26.2524	26.793	25.598	1.195						0		1.195
2016-07-13	Q3	7	29	195	2016-07-13	25.2305	25.671	24.557	1.114		2016-07-13	25.1784	25.72	23.593	2.127		1.6205		2016-07-13	25.3005	25.744	24.581	1.163						0		1.163
2016-07-14	Q3	7	29	196	2016-07-14	24.9637	25.283	24.291	0.992		2016-07-14	25.0037	25.72	24.122	1.598		1.295		2016-07-14	25.0343	25.355	24.363	0.992						0		0.992
2016-07-15	Q3	7	29	197	2016-07-15	24.628	25.016	24.074	0.942		2016-07-15	24.7254	25.113	24.363	0.75		0.846		2016-07-15	24.7018	25.089	24.146	0.943						0		0.943
2016-07-16	Q3	7	29	198	2016-07-16	24.0347	24.677	22.92	1.757		2016-07-16	24.2665	25.065	23.545	1.52		1.6385		2016-07-16	24.1077	24.75	22.992	1.758						0		1.758
2016-07-17	Q3	7	30	199	2016-07-17	24.7128	25.234	23.881	1.353		2016-07-17	24.6712	25.283	23.93	1.353		1.353		2016-07-17	24.7812	25.307	23.93	1.377						0		1.377
2016-07-18	Q3	7	30	200	2016-07-18	25.0298	25.477	24.484	0.993		2016-07-18	24.8351	25.38	23.689	1.691		1.342		2016-07-18	25.0953	25.525	24.46	1.065						0		1.065
2016-07-19	Q3	7	30	201	2016-07-19	25.0358	25.331	24.412	0.919		2016-07-19	24.8399	25.501	23.641	1.86		1.3895		2016-07-19	25.1056	25.404	24.484	0.92						0		0.92
2016-07-20	Q3	7	30	202	2016-07-20	25.2629	25.671	24.677	0.994		2016-07-20	25.1247	25.671	23.737	1.934		1.464		2016-07-20	25.3288	25.695	24.726	0.969						0		0.969
2016-07-21	Q3	7	30	203	2016-07-21	25.4363	25.914	24.508	1.406		2016-07-21	25.3042	25.89	24.074	1.816		1.611		2016-07-21	25.5039	25.939	24.605	1.334						0		1.334
2016-07-22	Q3	7	30	204	2016-07-22	25.4502	25.793	24.677	1.116		2016-07-22	25.2735	25.841	24.098	1.743		1.4295		2016-07-22	25.5154	25.817	24.702	1.115						0		1.115
2016-07-23	Q3	7	30	205	2016-07-23	25.6	26.182	24.726	1.456		2016-07-23	25.5126	26.989	24.122	2.867		2.1615		2016-07-23	25.664	26.231	24.823	1.408						0		1.408
2016-07-24	Q3	7	31	206	2016-07-24	25.5657	25.939	24.798	1.141		2016-07-24	25.4076	26.353	23.376	2.977		2.059		2016-07-24	25.633	25.987	24.847	1.14						0		1.14
2016-07-25	Q3	7	31	207	2016-07-25	25.5084	25.963	24.847	1.116		2016-07-25	25.4356	27.136	24.074	3.062		2.089		2016-07-25	25.5761	26.036	24.871	1.165						0		1.165
2016-07-26	Q3	7	31	208	2016-07-26	25.4113	25.914	24.726	1.188		2016-07-26	25.4152	27.038	24.508	2.53		1.859		2016-07-26	25.4722	25.939	24.605	1.334						0		1.334
2016-07-27	Q3	7	31	209	2016-07-27	25.4691	26.402	24.653	1.749		2016-07-27	25.6162	28.444	24.581	3.863		2.806		2016-07-27	25.5283	26.402	24.798	1.604						0		1.604
2016-07-28	Q3	7	31	210	2016-07-28	25.4999	26.207	24.798	1.409		2016-07-28	25.4849	27.014	24.629	2.385		1.897		2016-07-28	25.5573	26.207	24.871	1.336						0		1.336
2016-07-29	Q3	7	31	211	2016-07-29	25.3073	25.914	24.605	1.309		2016-07-29	25.2736	26.5	24.146	2.354		1.8315		2016-07-29	25.363	25.939	24.605	1.334						0		1.334
2016-07-30	Q3	7	31	212	2016-07-30	25.2058	25.866	24.412	1.454		2016-07-30	25.2485	26.744	24.508	2.236		1.845		2016-07-30	25.2608	25.866	24.46	1.406						0		1.406
2016-07-31	Q3	7	32	213	2016-07-31	25.272	25.817	24.653	1.164		2016-07-31	25.2211	26.012	24.629	1.383		1.2735		2016-07-31	25.3294	25.817	24.726	1.091						0		1.091
2016-08-01	Q3	8	32	214	2016-08-01	25.2288	25.574	24.605	0.969		2016-08-01	25.0245	25.477	23.593	1.884		1.4265		2016-08-01	25.2945	25.623	24.629	0.994						0		0.994
2016-08-02	Q3	8	32	215	2016-08-02	24.6296	25.428	23.665	1.763		2016-08-02	24.1219	25.307	21.246	4.061		2.912		2016-08-02	24.7061	25.501	23.569	1.932						0		1.932
2016-08-03	Q3	8	32	216	2016-08-03	24.2404	24.847	23.569	1.278		2016-08-03	24.0481	24.847	22.011	2.836		2.057		2016-08-03	24.3133	24.895	23.641	1.254						0		1.254
2016-08-04	Q3	8	32	217	2016-08-04	24.5941	25.04	23.93	1.11		2016-08-04	24.4517	24.992	22.992	2		1.555		2016-08-04	24.661	25.065	23.978	1.087						0		1.087
2016-08-05	Q3	8	32	218	2016-08-05	24.6518	24.968	23.28	1.688		2016-08-05	24.6895	24.798	24.363	0.435		1.0615		2016-08-05	24.7004	24.992	24.002	0.99						0		0.99
2016-08-06	Q3	8	32	219	2016-08-06	25.009	26.329	24.026	2.303						0		2.303		2016-08-06	25.0048	25.623	24.412	1.211						0		1.211
2016-08-07	Q3	8	33	220	2016-08-07	25.3682	28.295	24.363	3.932						0		3.932		2016-08-07	25.2385	26.012	24.436	1.576						0		1.576
2016-08-08	Q3	8	33	221	2016-08-08	25.6516	29.365	24.532	4.833						0		4.833		2016-08-08	25.4687	26.475	24.677	1.798						0		1.798
2016-08-09	Q3	8	33	222	2016-08-09	25.8354	28.866	24.508	4.358						0		4.358		2016-08-09	25.6725	26.818	24.774	2.044						0		2.044
2016-08-10	Q3	8	33	223	2016-08-10	26.0069	28.32	24.992	3.328						0		3.328		2016-08-10	25.798	26.769	25.113	1.656						0		1.656
2016-08-11	Q3	8	33	224	2016-08-11	25.8629	27.038	25.162	1.876						0		1.876		2016-08-11	25.8005	26.304	25.477	0.827						0		0.827
2016-08-12	Q3	8	33	225	2016-08-12	25.853	26.94	25.04	1.9						0		1.9		2016-08-12	25.79	26.475	25.283	1.192						0		1.192
2016-08-13	Q3	8	33	226	2016-08-13	25.9171	26.916	25.234	1.682						0		1.682		2016-08-13	25.8037	26.426	25.089	1.337						0		1.337
2016-08-14	Q3	8	34	227	2016-08-14	26.1464	27.063	25.695	1.368						0		1.368		2016-08-14	26.0203	26.622	25.574	1.048						0		1.048
2016-08-15	Q3	8	34	228	2016-08-15	26.2802	26.94	25.963	0.977						0		0.977		2016-08-15	26.168	26.524	25.939	0.585						0		0.585
2016-08-16	Q3	8	34	229	2016-08-16	26.1884	26.72	25.744	0.976						0		0.976		2016-08-16	26.1596	26.5	25.866	0.634						0		0.634
2016-08-17	Q3	8	34	230	2016-08-17	26.1268	26.598	25.234	1.364						0		1.364		2016-08-17	26.1554	26.5	25.501	0.999						0		0.999
2016-08-18	Q3	8	34	231	2016-08-18	26.1488	26.598	25.089	1.509						0		1.509		2016-08-18	26.1722	26.524	25.331	1.193						0		1.193
2016-08-19	Q3	8	34	232	2016-08-19	25.8654	26.378	23.978	2.4						0		2.4		2016-08-19	26.0567	26.353	25.21	1.143						0		1.143
2016-08-20	Q3	8	34	233	2016-08-20	25.7821	26.256	24.026	2.23						0		2.23		2016-08-20	25.9674	26.28	25.186	1.094						0		1.094
2016-08-21	Q3	8	35	234	2016-08-21	26.0156	27.235	24.653	2.582						0		2.582		2016-08-21	25.9984	26.573	25.162	1.411						0		1.411
2016-08-22	Q3	8	35	235	2016-08-22	25.9417	28.221	23.641	4.58						0		4.58		2016-08-22	26.0071	26.916	24.677	2.239						0		2.239
2016-08-23	Q3	8	35	236	2016-08-23	25.4685	26.207	22.753	3.454						0		3.454		2016-08-23	25.5895	25.914	24.557	1.357						0		1.357
2016-08-24	Q3	8	35	237	2016-08-24	25.1175	26.842	22.609	4.233						0		4.233		2016-08-24	25.1558	25.695	23.833	1.862						0		1.862
2016-08-25	Q3	8	35	238	2016-08-25	24.9124	26.549	22.657	3.892						0		3.892		2016-08-25	24.8221	25.307	23.472	1.835						0		1.835
2016-08-26	Q3	8	35	239	2016-08-26	25.0749	27.087	23.737	3.35						0		3.35		2016-08-26	24.8967	25.768	24.219	1.549						0		1.549
2016-08-27	Q3	8	35	240	2016-08-27	25.5878	27.85	24.702	3.148						0		3.148		2016-08-27	25.3696	26.646	24.75	1.896						0		1.896
2016-08-28	Q3	8	36	241	2016-08-28	25.9259	27.21	25.307	1.903						0		1.903		2016-08-28	25.7787	26.622	25.234	1.388						0		1.388
2016-08-29	Q3	8	36	242	2016-08-29	25.8635	26.256	25.598	0.658						0		0.658		2016-08-29	25.8156	26.158	25.525	0.633						0		0.633
2016-08-30	Q3	8	36	243	2016-08-30	25.628	25.89	24.774	1.116						0		1.116		2016-08-30	25.6914	25.866	25.258	0.608						0		0.608
2016-08-31	Q3	8	36	244	2016-08-31	25.7641	26.134	25.307	0.827						0		0.827		2016-08-31	25.765	25.963	25.574	0.389						0		0.389
2016-09-01	Q3	9	36	245	2016-09-01	25.9171	26.426	25.016	1.41						0		1.41		2016-09-01	25.9429	26.378	25.355	1.023						0		1.023
2016-09-02	Q3	9	36	246	2016-09-02	25.8997	26.256	24.677	1.579						0		1.579		2016-09-02	26.0177	26.231	25.307	0.924						0		0.924
2016-09-03	Q3	9	36	247	2016-09-03	26.0326	27.112	24.75	2.362						0		2.362		2016-09-03	26.0383	26.744	25.137	1.607						0		1.607
2016-09-04	Q3	9	37	248	2016-09-04	26.1658	27.358	25.234	2.124						0		2.124		2016-09-04	26.159	26.769	25.525	1.244						0		1.244
2016-09-05	Q3	9	37	249	2016-09-05	26.6055	30.824	25.477	5.347						0		5.347		2016-09-05	26.4301	27.579	26.012	1.567						0		1.567
2016-09-06	Q3	9	37	250	2016-09-06	26.8564	31.281	25.671	5.61						0		5.61		2016-09-06	26.6271	27.727	26.061	1.666						0		1.666
2016-09-07	Q3	9	37	251	2016-09-07	27.0323	31.281	25.987	5.294						0		5.294		2016-09-07	26.8097	27.998	25.963	2.035						0		2.035
2016-09-08	Q3	9	37	252	2016-09-08	27.0551	30.268	25.695	4.573						0		4.573		2016-09-08	26.8589	27.924	26.207	1.717						0		1.717
2016-09-09	Q3	9	37	253	2016-09-09	26.9551	28.717	25.623	3.094						0		3.094		2016-09-09	26.8513	27.751	26.207	1.544						0		1.544
2016-09-10	Q3	9	37	254	2016-09-10	27.0441	28.866	25.914	2.952						0		2.952		2016-09-10	26.9195	27.974	26.256	1.718						0		1.718
2016-09-11	Q3	9	38	255	2016-09-11	27.0707	28.295	26.182	2.113						0		2.113		2016-09-11	26.9742	28.122	25.963	2.159						0		2.159
2016-09-12	Q3	9	38	256	2016-09-12	27.2947	28.27	26.646	1.624						0		1.624		2016-09-12	27.2288	28.171	26.5	1.671						0		1.671
2016-09-13	Q3	9	38	257	2016-09-13	27.2775	27.998	26.891	1.107						0		1.107		2016-09-13	27.224	27.825	26.744	1.081						0		1.081
2016-09-14	Q3	9	38	258	2016-09-14	27.0018	27.431	26.036	1.395						0		1.395		2016-09-14	27.0474	27.407	26.378	1.029						0		1.029
2016-09-15	Q3	9	38	259	2016-09-15	26.6864	27.161	25.428	1.733						0		1.733		2016-09-15	26.7625	27.063	26.109	0.954						0		0.954
2016-09-16	Q3	9	38	260	2016-09-16	26.7979	27.259	25.72	1.539						0		1.539		2016-09-16	26.8664	27.259	26.256	1.003						0		1.003
2016-09-17	Q3	9	38	261	2016-09-17	26.9285	27.456	25.963	1.493						0		1.493		2016-09-17	26.9601	27.579	26.329	1.25						0		1.25
2016-09-18	Q3	9	39	262	2016-09-18	26.8208	27.382	25.355	2.027						0		2.027		2016-09-18	26.9393	27.481	26.012	1.469						0		1.469
2016-09-19	Q3	9	39	263	2016-09-19	27.154	29.89	25.866	4.024						0		4.024		2016-09-19	27.1257	27.998	26.182	1.816						0		1.816
2016-09-20	Q3	9	39	264	2016-09-20	27.1143	28.841	25.817	3.024						0		3.024		2016-09-20	27.1132	27.751	26.158	1.593						0		1.593
2016-09-21	Q3	9	39	265	2016-09-21	27.1592	30.167	25.647	4.52						0		4.52		2016-09-21	27.1108	27.949	26.061	1.888						0		1.888
2016-09-22	Q3	9	39	266	2016-09-22	27.5701	33.079	26.475	6.604						0		6.604		2016-09-22	27.2679	28.916	26.134	2.782						0		2.782
2016-09-23	Q3	9	39	267	2016-09-23	27.6499	31.612	26.402	5.21						0		5.21		2016-09-23	27.4066	28.965	26.622	2.343						0		2.343
2016-09-24	Q3	9	39	268	2016-09-24	27.7172	30.672	26.158	4.514						0		4.514		2016-09-24	27.4671	28.816	26.671	2.145						0		2.145
2016-09-25	Q3	9	40	269	2016-09-25	27.7189	29.515	26.573	2.942						0		2.942		2016-09-25	27.6063	28.791	26.818	1.973						0		1.973
2016-09-26	Q3	9	40	270	2016-09-26	27.8284	29.315	27.112	2.203						0		2.203		2016-09-26	27.6905	28.568	26.989	1.579						0		1.579
2016-09-27	Q3	9	40	271	2016-09-27	27.8159	28.667	27.308	1.359						0		1.359		2016-09-27	27.7471	28.32	27.136	1.184						0		1.184
2016-09-28	Q3	9	40	272	2016-09-28	27.7468	28.345	26.94	1.405						0		1.405		2016-09-28	27.7661	28.122	27.407	0.715						0		0.715
2016-09-29	Q3	9	40	273	2016-09-29	27.7233	28.097	27.038	1.059						0		1.059		2016-09-29	27.7741	28.072	27.382	0.69						0		0.69
2016-09-30	Q3	9	40	274	2016-09-30	27.734	28.245	26.842	1.403						0		1.403		2016-09-30	27.7918	28.221	27.308	0.913						0		0.913
2016-10-01	Q4	10	40	275	2016-10-01	27.7843	28.196	26.793	1.403						0		1.403		2016-10-01	27.8456	28.245	27.112	1.133						0		1.133
2016-10-02	Q4	10	41	276	2016-10-02	27.8654	28.32	27.21	1.11						0		1.11		2016-10-02	27.8652	28.394	27.382	1.012						0		1.012
2016-10-03	Q4	10	41	277	2016-10-03	27.3425	27.875	25.525	2.35						0		2.35		2016-10-03	27.5267	27.875	26.598	1.277						0		1.277
2016-10-04	Q4	10	41	278	2016-10-04	27.6089	28.941	26.867	2.074						0		2.074		2016-10-04	27.6266	28.221	27.284	0.937						0		0.937
2016-10-05	Q4	10	41	279	2016-10-05	28.1847	32.975	27.407	5.568						0		5.568		2016-10-05	27.9455	29.34	27.53	1.81						0		1.81
2016-10-06	Q4	10	41	280	2016-10-06	28.4249	32.872	27.653	5.219						0		5.219		2016-10-06	28.1436	29.515	27.677	1.838						0		1.838
2016-10-07	Q4	10	41	281	2016-10-07	28.6307	33.131	27.407	5.724						0		5.724		2016-10-07	28.3544	29.74	27.801	1.939						0		1.939
2016-10-08	Q4	10	41	282	2016-10-08	28.7874	31.484	27.949	3.535						0		3.535		2016-10-08	28.6241	29.79	27.776	2.014						0		2.014
2016-10-09	Q4	10	42	283	2016-10-09	28.9394	31.331	28.122	3.209						0		3.209		2016-10-09	28.791	30.369	28.097	2.272						0		2.272
2016-10-10	Q4	10	42	284	2016-10-10	29.0107	30.621	28.32	2.301						0		2.301		2016-10-10	28.9324	30.167	28.221	1.946						0		1.946
2016-10-11	Q4	10	42	285	2016-10-11	29.1274	30.243	28.518	1.725						0		1.725		2016-10-11	29.0736	30.243	28.543	1.7						0		1.7
2016-10-12	Q4	10	42	286	2016-10-12	29.0149	30.243	28.543	1.7						0		1.7		2016-10-12	28.9357	29.665	28.543	1.122						0		1.122
2016-10-13	Q4	10	42	287	2016-10-13	28.9318	29.815	28.518	1.297						0		1.297		2016-10-13	28.9199	29.715	28.493	1.222						0		1.222
2016-10-14	Q4	10	42	288	2016-10-14	28.9077	29.59	28.196	1.394						0		1.394		2016-10-14	28.9789	29.59	28.667	0.923						0		0.923
2016-10-15	Q4	10	42	289	2016-10-15	28.9765	29.54	28.221	1.319						0		1.319		2016-10-15	29.0028	29.565	28.568	0.997						0		0.997
2016-10-16	Q4	10	43	290	2016-10-16	29.1246	29.64	28.221	1.419						0		1.419		2016-10-16	29.1441	29.74	28.692	1.048						0		1.048
2016-10-17	Q4	10	43	291	2016-10-17	29.0722	29.215	28.543	0.672						0		0.672		2016-10-17	28.8699	29.265	27.136	2.129						0		2.129
2016-10-18	Q4	10	43	292	2016-10-18	29.1021	31.382	27.702	3.68						0		3.68		2016-10-18	28.9725	29.09	28.916	0.174						0		0.174
2016-10-19	Q4	10	43	293	2016-10-19	29.2785	32.304	28.048	4.256						0		4.256		2016-10-19	29.273	31.001	28.642	2.359						0		2.359
2016-10-20	Q4	10	43	294	2016-10-20	29.6124	33.757	28.766	4.991						0		4.991		2016-10-20	29.5275	31.23	28.99	2.24						0		2.24
2016-10-21	Q4	10	43	295	2016-10-21	29.8709	35.529	28.841	6.688						0		6.688		2016-10-21	29.562	31.255	29.065	2.19						0		2.19
2016-10-22	Q4	10	43	296	2016-10-22	30.0142	34.969	29.165	5.804						0		5.804		2016-10-22	29.667	30.976	29.09	1.886						0		1.886
2016-10-23	Q4	10	44	297	2016-10-23	29.9869	32.949	29.265	3.684						0		3.684		2016-10-23	29.7848	31.357	29.315	2.042						0		2.042
2016-10-24	Q4	10	44	298	2016-10-24	29.9419	31.535	29.34	2.195						0		2.195		2016-10-24	29.9191	31.382	29.414	1.968						0		1.968
2016-10-25	Q4	10	44	299	2016-10-25	29.9766	31.408	29.29	2.118						0		2.118		2016-10-25	29.9202	30.925	29.34	1.585						0		1.585
2016-10-26	Q4	10	44	300	2016-10-26	29.926	30.925	29.389	1.536						0		1.536		2016-10-26	29.9095	30.596	29.34	1.256						0		1.256
2016-10-27	Q4	10	44	301	2016-10-27	29.7819	30.419	29.19	1.229						0		1.229		2016-10-27	29.8457	30.268	29.54	0.728						0		0.728
2016-10-28	Q4	10	44	302	2016-10-28	29.8205	30.369	29.389	0.98						0		0.98		2016-10-28	29.8933	30.293	29.565	0.728						0		0.728
2016-10-29	Q4	10	44	303	2016-10-29	29.8396	30.369	29.265	1.104						0		1.104		2016-10-29	29.9152	30.293	29.64	0.653						0		0.653
2016-10-30	Q4	10	45	304	2016-10-30	29.9112	30.571	29.439	1.132						0		1.132		2016-10-30	30.0174	30.495	29.765	0.73						0		0.73
2016-10-31	Q4	10	45	305	2016-10-31	30.169	31.51	29.389	2.121						0		2.121		2016-10-31	30.169	31.052	29.69	1.362						0		1.362
2016-11-01	Q4	11	45	306	2016-11-01	30.3952	33.548	29.464	4.084						0		4.084		2016-11-01	30.3162	31.382	29.665	1.717						0		1.717
2016-11-02	Q4	11	45	307	2016-11-02	30.5629	34.545	29.49	5.055						0		5.055		2016-11-02	30.4373	31.663	29.765	1.898						0		1.898
2016-11-03	Q4	11	45	308	2016-11-03	30.5851	34.889	29.065	5.824						0		5.824		2016-11-03	30.4651	31.561	29.74	1.821						0		1.821
2016-11-04	Q4	11	45	309	2016-11-04	30.7565	34.545	30.066	4.479						0		4.479		2016-11-04	30.624	31.97	30.091	1.879						0		1.879
2016-11-05	Q4	11	45	310	2016-11-05	31.068	35.877	30.293	5.584						0		5.584		2016-11-05	30.8017	32.33	30.343	1.987						0		1.987
2016-11-06	Q4	11	46	311	2016-11-06	31.0248	33.73	30.142	3.588						0		3.588		2016-11-06	30.9204	32.201	30.369	1.832						0		1.832
2016-11-07	Q4	11	46	312	2016-11-07	31.0295	33.495	30.192	3.303						0		3.303		2016-11-07	30.9098	32.175	30.217	1.958						0		1.958
2016-11-08	Q4	11	46	313	2016-11-08	30.9409	32.691	30.419	2.272						0		2.272		2016-11-08	30.8664	31.944	30.293	1.651						0		1.651
2016-11-09	Q4	11	46	314	2016-11-09	30.9085	32.407	30.318	2.089						0		2.089		2016-11-09	30.8356	31.484	30.243	1.241						0		1.241
2016-11-10	Q4	11	46	315	2016-11-10	30.6799	31.944	29.991	1.953						0		1.953		2016-11-10	30.6244	31.179	30.041	1.138						0		1.138
2016-11-11	Q4	11	46	316	2016-11-11	30.2571	31.103	29.315	1.788						0		1.788		2016-11-11	30.26	30.672	29.464	1.208						0		1.208
2016-11-12	Q4	11	46	317	2016-11-12	30.0825	30.925	29.165	1.76						0		1.76		2016-11-12	30.1562	30.646	29.64	1.006						0		1.006
2016-11-13	Q4	11	47	318	2016-11-13	29.9765	30.646	28.866	1.78						0		1.78		2016-11-13	30.1124	30.621	29.464	1.157						0		1.157
2016-11-14	Q4	11	47	319	2016-11-14	29.9421	30.495	29.09	1.405						0		1.405		2016-11-14	30.0891	30.444	29.54	0.904						0		0.904
2016-11-15	Q4	11	47	320	2016-11-15	30.2741	31.535	29.14	2.395						0		2.395		2016-11-15	30.3373	31.128	29.69	1.438						0		1.438
2016-11-16	Q4	11	47	321	2016-11-16	30.5911	33.626	29.515	4.111						0		4.111		2016-11-16	30.5742	31.74	29.89	1.85						0		1.85
2016-11-17	Q4	11	47	322	2016-11-17	30.8442	34.863	29.64	5.223						0		5.223		2016-11-17	30.7618	32.898	29.966	2.932						0		2.932
2016-11-18	Q4	11	47	323	2016-11-18	31.1625	36.254	30.066	6.188						0		6.188		2016-11-18	31.0173	33.157	30.419	2.738						0		2.738
2016-11-19	Q4	11	47	324	2016-11-19	31.2996	36.092	30.444	5.648						0		5.648		2016-11-19	31.1475	33.027	30.52	2.507						0		2.507
2016-11-20	Q4	11	48	325	2016-11-20	31.3616	34.545	30.495	4.05						0		4.05		2016-11-20	31.2168	32.717	30.697	2.02						0		2.02
2016-11-21	Q4	11	48	326	2016-11-21	31.3442	33.861	30.52	3.341						0		3.341		2016-11-21	31.2444	32.484	30.571	1.913						0		1.913
2016-11-22	Q4	11	48	327	2016-11-22	31.3126	33.861	30.394	3.467						0		3.467		2016-11-22	31.1782	32.898	30.469	2.429						0		2.429
2016-11-23	Q4	11	48	328	2016-11-23	31.292	32.846	30.672	2.174						0		2.174		2016-11-23	31.1602	32.407	30.469	1.938						0		1.938
2016-11-24	Q4	11	48	329	2016-11-24	31.3162	32.82	30.722	2.098						0		2.098		2016-11-24	31.325	32.458	30.571	1.887						0		1.887
2016-11-25	Q4	11	48	330	2016-11-25	31.2649	32.253	30.495	1.758						0		1.758		2016-11-25	31.2929	32.021	30.798	1.223						0		1.223
2016-11-26	Q4	11	48	331	2016-11-26	31.0813	32.098	30.016	2.082						0		2.082		2016-11-26	31.1777	31.944	30.697	1.247						0		1.247
2016-11-27	Q4	11	49	332	2016-11-27	31.1402	31.97	29.865	2.105						0		2.105		2016-11-27	31.2757	31.996	30.748	1.248						0		1.248
2016-11-28	Q4	11	49	333	2016-11-28	31.2095	31.663	30.545	1.118						0		1.118		2016-11-28	31.3018	31.612	30.849	0.763						0		0.763
2016-11-29	Q4	11	49	334	2016-11-29	31.2966	31.944	30.419	1.525						0		1.525		2016-11-29	31.4061	31.816	31.026	0.79						0		0.79
2016-11-30	Q4	11	49	335	2016-11-30	31.4451	33.131	30.192	2.939						0		2.939		2016-11-30	31.5148	32.355	30.849	1.506						0		1.506
2016-12-01	Q4	12	49	336	2016-12-01	31.5889	34.44	30.293	4.147						0		4.147		2016-12-01	31.5976	32.562	30.9	1.662						0		1.662
2016-12-02	Q4	12	49	337	2016-12-02	31.5873	33.835	30.52	3.315						0		3.315		2016-12-02	31.5418	32.407	30.824	1.583						0		1.583
2016-12-03	Q4	12	49	338	2016-12-03	31.7477	35.636	30.571	5.065						0		5.065		2016-12-03	31.6123	33.131	30.849	2.282						0		2.282
2016-12-04	Q4	12	50	339	2016-12-04	31.5737	34.071	30.773	3.298						0		3.298		2016-12-04	31.5294	32.355	31.026	1.329						0		1.329
2016-12-05	Q4	12	50	340	2016-12-05	31.1943	32.872	30.469	2.403						0		2.403		2016-12-05	31.1831	31.791	30.697	1.094						0		1.094
2016-12-06	Q4	12	50	341	2016-12-06	31.2918	33.783	30.369	3.414						0		3.414		2016-12-06	31.1876	32.201	30.52	1.681						0		1.681
2016-12-07	Q4	12	50	342	2016-12-07	31.554	34.598	30.596	4.002						0		4.002		2016-12-07	31.29	32.587	30.646	1.941						0		1.941
2016-12-08	Q4	12	50	343	2016-12-08	31.7392	34.071	30.697	3.374						0		3.374		2016-12-08	31.5956	33.027	30.722	2.305						0		2.305
2016-12-09	Q4	12	50	344	2016-12-09	31.8684	33.757	31.103	2.654						0		2.654		2016-12-09	31.6872	32.484	31.153	1.331						0		1.331
2016-12-10	Q4	12	50	345	2016-12-10	31.5291	33.001	30.824	2.177						0		2.177		2016-12-10	31.4417	32.047	30.722	1.325						0		1.325
2016-12-11	Q4	12	51	346	2016-12-11	31.2794	32.33	29.79	2.54						0		2.54		2016-12-11	31.3303	31.765	30.394	1.371						0		1.371
2016-12-12	Q4	12	51	347	2016-12-12	31.3815	32.227	30.343	1.884						0		1.884		2016-12-12	31.4143	31.944	31.026	0.918						0		0.918
2016-12-13	Q4	12	51	348	2016-12-13	31.4403	32.021	30.824	1.197						0		1.197		2016-12-13	31.5204	32.021	31.153	0.868						0		0.868
2016-12-14	Q4	12	51	349	2016-12-14	31.4735	32.047	30.621	1.426						0		1.426		2016-12-14	31.5496	32.15	30.95	1.2						0		1.2
2016-12-15	Q4	12	51	350	2016-12-15	31.5131	32.562	30.571	1.991						0		1.991		2016-12-15	31.563	32.15	30.874	1.276						0		1.276
2016-12-16	Q4	12	51	351	2016-12-16	31.3613	31.97	30.318	1.652						0		1.652		2016-12-16	31.4454	31.868	30.672	1.196						0		1.196
2016-12-17	Q4	12	51	352	2016-12-17	31.8416	37.124	30.596	6.528						0		6.528		2016-12-17	31.6027	33.183	30.95	2.233						0		2.233
2016-12-18	Q4	12	52	353	2016-12-18	31.7788	34.783	30.874	3.909						0		3.909		2016-12-18	31.694	32.846	31.281	1.565						0		1.565
2016-12-19	Q4	12	52	354	2016-12-19	31.6319	34.308	30.748	3.56						0		3.56		2016-12-19	31.5656	32.639	31.026	1.613						0		1.613
2016-12-20	Q4	12	52	355	2016-12-20	31.0956	31.306	30.646	0.66						0		0.66		2016-12-20	31.2048	31.408	31.001	0.407						0		0.407
2016-12-21	Q4	12	52	356	2016-12-21	31.0442	31.433	30.571	0.862						0		0.862		2016-12-21	31.0638	31.23	30.646	0.584						0		0.584
2016-12-22	Q4	12	52	357	2016-12-22	30.7642	31.484	30.444	1.04						0		1.04		2016-12-22	30.7069	31.001	30.394	0.607						0		0.607
2016-12-23	Q4	12	52	358	2016-12-23	30.4319	30.722	30.091	0.631						0		0.631		2016-12-23	30.4514	30.621	30.041	0.58						0		0.58
2016-12-24	Q4	12	52	359	2016-12-24	30.1643	30.444	29.665	0.779						0		0.779		2016-12-24	30.2147	30.469	29.715	0.754						0		0.754
2016-12-25	Q4	12	53	360	2016-12-25	29.9909	30.318	29.464	0.854						0		0.854		2016-12-25	30.0805	30.369	29.74	0.629						0		0.629
2016-12-26	Q4	12	53	361	2016-12-26	29.91	30.293	28.941	1.352						0		1.352		2016-12-26	29.9578	30.217	29.49	0.727						0		0.727
2016-12-27	Q4	12	53	362	2016-12-27	29.8459	30.217	29.389	0.828						0		0.828		2016-12-27	29.8841	30.217	29.59	0.627						0		0.627
2016-12-28	Q4	12	53	363	2016-12-28	29.9427	30.192	29.439	0.753						0		0.753		2016-12-28	29.9673	30.217	29.54	0.677						0		0.677
2016-12-29	Q4	12	53	364	2016-12-29	30.112	30.621	29.19	1.431						0		1.431		2016-12-29	30.1212	30.444	29.54	0.904						0		0.904
2016-12-30	Q4	12	53	365	2016-12-30	30.1919	31.128	29.14	1.988						0		1.988		2016-12-30	30.206	30.646	29.615	1.031						0		1.031
2016-12-31	Q4	12	53	366	2016-12-31	30.3009	31.51	29.464	2.046						0		2.046		2016-12-31	30.2711	30.722	29.665	1.057						0		1.057
2017-01-01	Q1	1	1	1	2017-01-01	30.3532	32.15	29.065	3.085						0		3.085		2017-01-01	30.321	30.874	29.464	1.41						0		1.41
2017-01-02	Q1	1	1	2	2017-01-02	30.7077	35.609	29.765	5.844						0		5.844		2017-01-02	30.4838	31.484	29.89	1.594						0		1.594
2017-01-03	Q1	1	1	3	2017-01-03	30.9761	35.582	29.966	5.616						0		5.616		2017-01-03	30.7379	31.944	30.117	1.827						0		1.827
2017-01-04	Q1	1	1	4	2017-01-04	31.0609	34.492	30.318	4.174						0		4.174		2017-01-04	30.9361	32.047	30.318	1.729						0		1.729
2017-01-05	Q1	1	1	5	2017-01-05	30.5056	31.153	29.64	1.513						0		1.513		2017-01-05	30.5595	30.925	29.966	0.959						0		0.959
2017-01-06	Q1	1	1	6	2017-01-06	30.3116	31.689	29.115	2.574						0		2.574		2017-01-06	30.2655	30.9	29.54	1.36						0		1.36
2017-01-07	Q1	1	1	7	2017-01-07	30.419	32.355	29.59	2.765						0		2.765		2017-01-07	30.3362	31.204	29.665	1.539						0		1.539
2017-01-08	Q1	1	2	8	2017-01-08	30.4582	31.944	29.665	2.279						0		2.279		2017-01-08	30.4181	31.128	29.765	1.363						0		1.363
2017-01-09	Q1	1	2	9	2017-01-09	30.5266	32.047	29.365	2.682						0		2.682		2017-01-09	30.5179	31.357	29.59	1.767						0		1.767
2017-01-10	Q1	1	2	10	2017-01-10	30.452	31.23	29.34	1.89						0		1.89		2017-01-10	30.4965	30.874	29.916	0.958						0		0.958
2017-01-11	Q1	1	2	11	2017-01-11	30.3447	30.672	29.59	1.082						0		1.082		2017-01-11	30.4411	30.697	29.966	0.731						0		0.731
2017-01-12	Q1	1	2	12	2017-01-12	30.2137	30.545	29.615	0.93						0		0.93		2017-01-12	30.2834	30.495	29.765	0.73						0		0.73
2017-01-13	Q1	1	2	13	2017-01-13	30.1923	30.469	29.815	0.654						0		0.654		2017-01-13	30.2626	30.419	29.966	0.453						0		0.453
2017-01-14	Q1	1	2	14	2017-01-14	30.4289	31.765	29.665	2.1						0		2.1		2017-01-14	30.425	30.976	30.142	0.834						0		0.834
2017-01-15	Q1	1	3	15	2017-01-15	30.6614	32.742	29.765	2.977						0		2.977		2017-01-15	30.6231	31.331	30.293	1.038						0		1.038
2017-01-16	Q1	1	3	16	2017-01-16	31.0129	35.288	30.016	5.272						0		5.272		2017-01-16	30.8875	32.381	30.444	1.937						0		1.937
2017-01-17	Q1	1	3	17	2017-01-17	31.0344	34.071	30.343	3.728						0		3.728		2017-01-17	30.9224	32.021	30.419	1.602						0		1.602
2017-01-18	Q1	1	3	18	2017-01-18	30.4902	30.722	29.865	0.857						0		0.857		2017-01-18	30.5496	30.748	30.217	0.531						0		0.531
2017-01-19	Q1	1	3	19	2017-01-19	30.4634	31.663	29.715	1.948						0		1.948		2017-01-19	30.4537	30.925	29.941	0.984						0		0.984
2017-01-20	Q1	1	3	20	2017-01-20	30.5021	31.868	29.64	2.228						0		2.228		2017-01-20	30.4518	31.179	29.79	1.389						0		1.389
2017-01-21	Q1	1	3	21	2017-01-21	30.6912	32.742	29.565	3.177						0		3.177		2017-01-21	30.5941	31.714	29.69	2.024						0		2.024
2017-01-22	Q1	1	4	22	2017-01-22	30.8193	32.15	30.293	1.857						0		1.857		2017-01-22	30.7923	31.612	30.293	1.319						0		1.319
2017-01-23	Q1	1	4	23	2017-01-23	30.7069	31.51	30.217	1.293						0		1.293		2017-01-23	30.7423	31.382	30.091	1.291						0		1.291
2017-01-24	Q1	1	4	24	2017-01-24	30.5017	30.824	29.765	1.059						0		1.059		2017-01-24	30.5778	30.798	30.117	0.681						0		0.681
2017-01-25	Q1	1	4	25	2017-01-25	30.2549	30.571	29.165	1.406						0		1.406		2017-01-25	30.3648	30.672	29.715	0.957						0		0.957
2017-01-26	Q1	1	4	26	2017-01-26	29.949	30.343	29.015	1.328						0		1.328		2017-01-26	30.1267	30.394	29.79	0.604						0		0.604
2017-01-27	Q1	1	4	27	2017-01-27	29.6765	30.117	28.965	1.152						0		1.152		2017-01-27	29.8171	30.142	29.389	0.753						0		0.753
2017-01-28	Q1	1	4	28	2017-01-28	29.6152	30.117	28.866	1.251						0		1.251		2017-01-28	29.7103	30.117	29.215	0.902						0		0.902
2017-01-29	Q1	1	5	29	2017-01-29	29.8606	31.765	29.315	2.45						0		2.45		2017-01-29	29.8457	30.571	29.414	1.157						0		1.157
2017-01-30	Q1	1	5	30	2017-01-30	30.2094	33.887	29.59	4.297						0		4.297		2017-01-30	30.0431	30.824	29.765	1.059						0		1.059
2017-01-31	Q1	1	5	31	2017-01-31	30.6024	35.342	29.84	5.502						0		5.502		2017-01-31	30.4078	31.408	30.066	1.342						0		1.342
2017-02-01	Q1	2	5	32	2017-02-01	30.4026	31.484	29.991	1.493						0		1.493		2017-02-01	30.4457	30.798	30.217	0.581						0		0.581
2017-02-02	Q1	2	5	33	2017-02-02	30.71	33.626	30.066	3.56						0		3.56		2017-02-02	30.6628	31.586	30.268	1.318						0		1.318
2017-02-03	Q1	2	5	34	2017-02-03	31.1196	36.281	30.117	6.164						0		6.164		2017-02-03	30.7949	32.098	30.243	1.855						0		1.855
2017-02-04	Q1	2	5	35	2017-02-04	30.7653	32.047	30.318	1.729						0		1.729		2017-02-04	30.7998	31.281	30.545	0.736						0		0.736
2017-02-05	Q1	2	6	36	2017-02-05	30.9064	33.105	30.217	2.888						0		2.888		2017-02-05	30.8359	31.484	30.444	1.04						0		1.04
2017-02-06	Q1	2	6	37	2017-02-06	30.8925	31.714	30.419	1.295						0		1.295		2017-02-06	30.9041	31.433	30.419	1.014						0		1.014
2017-02-07	Q1	2	6	38	2017-02-07	30.5474	30.95	30.142	0.808						0		0.808		2017-02-07	30.5808	30.9	30.142	0.758						0		0.758
2017-02-08	Q1	2	6	39	2017-02-08	29.9886	30.343	28.99	1.353						0		1.353		2017-02-08	30.0645	30.343	29.365	0.978						0		0.978
2017-02-09	Q1	2	6	40	2017-02-09	30.1084	30.646	29.49	1.156						0		1.156		2017-02-09	30.1572	30.571	29.765	0.806						0		0.806
2017-02-10	Q1	2	6	41	2017-02-10	30.1996	30.646	29.515	1.131						0		1.131		2017-02-10	30.2873	30.596	29.916	0.68						0		0.68
2017-02-11	Q1	2	6	42	2017-02-11	30.2224	31.077	28.916	2.161						0		2.161		2017-02-11	30.2994	30.976	29.515	1.461						0		1.461
2017-02-12	Q1	2	7	43	2017-02-12	30.1735	31.535	28.816	2.719						0		2.719		2017-02-12	30.2475	30.9	29.165	1.735						0		1.735
2017-02-13	Q1	2	7	44	2017-02-13	29.5773	30.142	28.171	1.971						0		1.971		2017-02-13	29.7477	30.192	28.816	1.376						0		1.376
2017-02-14	Q1	2	7	45	2017-02-14	29.5252	29.79	28.543	1.247						0		1.247		2017-02-14	29.5964	29.84	28.941	0.899						0		0.899
2017-02-15	Q1	2	7	46	2017-02-15	29.5369	31.128	28.171	2.957						0		2.957		2017-02-15	29.5421	29.966	28.941	1.025						0		1.025
2017-02-16	Q1	2	7	47	2017-02-16	29.6811	32.124	28.717	3.407						0		3.407		2017-02-16	29.6404	30.369	28.791	1.578						0		1.578
2017-02-17	Q1	2	7	48	2017-02-17	29.7651	31.765	28.99	2.775						0		2.775		2017-02-17	29.7288	30.469	29.09	1.379						0		1.379
2017-02-18	Q1	2	7	49	2017-02-18	30.1162	33.001	28.891	4.11						0		4.11		2017-02-18	29.9628	31.23	29.24	1.99						0		1.99
2017-02-19	Q1	2	8	50	2017-02-19	30.2371	31.868	29.165	2.703						0		2.703		2017-02-19	30.2132	31.026	29.615	1.411						0		1.411
2017-02-20	Q1	2	8	51	2017-02-20	30.3034	31.663	29.59	2.073						0		2.073		2017-02-20	30.2029	31.001	29.615	1.386						0		1.386
2017-02-21	Q1	2	8	52	2017-02-21	30.4994	31.408	29.916	1.492						0		1.492		2017-02-21	30.4807	31.382	29.916	1.466						0		1.466
2017-02-22	Q1	2	8	53	2017-02-22	30.7755	31.791	30.217	1.574						0		1.574		2017-02-22	30.8131	31.868	30.167	1.701						0		1.701
2017-02-23	Q1	2	8	54	2017-02-23	30.8997	31.816	29.941	1.875						0		1.875		2017-02-23	30.9178	31.714	30.243	1.471						0		1.471
2017-02-24	Q1	2	8	55	2017-02-24	31.0721	32.098	29.89	2.208						0		2.208		2017-02-24	31.1378	31.919	30.343	1.576						0		1.576
2017-02-25	Q1	2	8	56	2017-02-25	30.7545	31.179	30.167	1.012						0		1.012		2017-02-25	30.8615	31.23	30.52	0.71						0		0.71
2017-02-26	Q1	2	9	57	2017-02-26	30.3476	30.824	28.642	2.182						0		2.182		2017-02-26	30.5197	30.798	30.091	0.707						0		0.707
2017-02-27	Q1	2	9	58	2017-02-27	30.6881	32.15	29.14	3.01						0		3.01		2017-02-27	30.7792	31.51	30.419	1.091						0		1.091
2017-02-28	Q1	2	9	59	2017-02-28	30.3252	30.874	28.518	2.356						0		2.356		2017-02-28	30.5272	30.976	29.665	1.311						0		1.311
2017-03-01	Q1	3	9	60	2017-03-01	30.7883	33.704	30.066	3.638						0		3.638		2017-03-01	30.775	31.433	30.318	1.115						0		1.115
2017-03-02	Q1	3	9	61	2017-03-02	31.034	35.288	29.439	5.849						0		5.849		2017-03-02	30.9086	31.97	30.167	1.803						0		1.803
2017-03-03	Q1	3	9	62	2017-03-03	31.2914	36.606	30.469	6.137						0		6.137		2017-03-03	31.072	32.304	30.444	1.86						0		1.86
2017-03-04	Q1	3	9	63	2017-03-04	31.3801	34.677	30.748	3.929						0		3.929		2017-03-04	31.2527	32.433	30.773	1.66						0		1.66
2017-03-05	Q1	3	10	64	2017-03-05	31.4821	34.176	30.849	3.327						0		3.327		2017-03-05	31.3253	32.381	30.95	1.431						0		1.431
2017-03-06	Q1	3	10	65	2017-03-06	31.3925	33.365	30.268	3.097						0		3.097		2017-03-06	31.3076	32.227	30.824	1.403						0		1.403
2017-03-07	Q1	3	10	66	2017-03-07	30.2381	30.798	29.04	1.758						0		1.758		2017-03-07	30.308	30.824	29.365	1.459						0		1.459
2017-03-08	Q1	3	10	67	2017-03-08	29.9758	30.824	29.29	1.534						0		1.534		2017-03-08	29.87	30.621	29.09	1.531						0		1.531
2017-03-09	Q1	3	10	68	2017-03-09	30.0199	30.495	29.515	0.98						0		0.98		2017-03-09	30.1038	30.318	29.665	0.653						0		0.653
2017-03-10	Q1	3	10	69	2017-03-10	29.9995	30.571	29.165	1.406						0		1.406		2017-03-10	30.0644	30.268	29.665	0.603						0		0.603
2017-03-11	Q1	3	10	70	2017-03-11	30.1093	30.419	29.565	0.854						0		0.854		2017-03-11	30.1552	30.318	29.79	0.528						0		0.528
2017-03-12	Q1	3	11	71	2017-03-12	30.3852	31.052	29.916	1.136						0		1.136		2017-03-12	30.4046	30.9	30.066	0.834						0		0.834
2017-03-13	Q1	3	11	72	2017-03-13	30.0228	30.52	28.518	2.002						0		2.002		2017-03-13	30.2392	30.495	29.74	0.755						0		0.755
2017-03-14	Q1	3	11	73	2017-03-14	30.5238	32.717	29.89	2.827						0		2.827		2017-03-14	30.5144	31.052	30.142	0.91						0		0.91
2017-03-15	Q1	3	11	74	2017-03-15	30.8379	34.387	30.117	4.27						0		4.27		2017-03-15	30.767	31.535	30.444	1.091						0		1.091
2017-03-16	Q1	3	11	75	2017-03-16	30.8942	33.053	29.565	3.488						0		3.488		2017-03-16	30.9454	31.97	30.571	1.399						0		1.399
2017-03-17	Q1	3	11	76	2017-03-17	30.8127	31.919	30.268	1.651						0		1.651		2017-03-17	30.8753	31.382	30.621	0.761						0		0.761
2017-03-18	Q1	3	11	77	2017-03-18	30.7757	32.021	29.24	2.781						0		2.781		2017-03-18	30.8585	31.51	30.318	1.192						0		1.192
2017-03-19	Q1	3	12	78	2017-03-19	30.813	32.484	29.414	3.07						0		3.07		2017-03-19	30.8006	31.791	29.89	1.901						0		1.901
2017-03-20	Q1	3	12	79	2017-03-20	30.8645	32.381	29.34	3.041						0		3.041		2017-03-20	30.8593	31.663	30.117	1.546						0		1.546
2017-03-21	Q1	3	12	80	2017-03-21	30.5891	31.153	28.841	2.312						0		2.312		2017-03-21	30.6744	31.255	29.665	1.59						0		1.59
2017-03-22	Q1	3	12	81	2017-03-22	30.64	31.128	30.293	0.835						0		0.835		2017-03-22	30.6944	31.179	30.318	0.861						0		0.861
2017-03-23	Q1	3	12	82	2017-03-23	30.4124	30.773	29.865	0.908						0		0.908		2017-03-23	30.4187	30.722	29.89	0.832						0		0.832
2017-03-24	Q1	3	12	83	2017-03-24	30.4502	31.179	30.016	1.163						0		1.163		2017-03-24	30.4491	31.001	29.89	1.111						0		1.111
2017-03-25	Q1	3	12	84	2017-03-25	30.5492	31.026	30.041	0.985						0		0.985		2017-03-25	30.5948	30.874	30.318	0.556						0		0.556
2017-03-26	Q1	3	13	85	2017-03-26	30.524	30.95	29.815	1.135						0		1.135		2017-03-26	30.5894	30.925	30.117	0.808						0		0.808
2017-03-27	Q1	3	13	86	2017-03-27	30.5575	31.026	29.865	1.161						0		1.161		2017-03-27	30.6602	30.976	30.192	0.784						0		0.784
2017-03-28	Q1	3	13	87	2017-03-28	30.5514	31.103	29.389	1.714						0		1.714		2017-03-28	30.6306	31.103	29.79	1.313						0		1.313
2017-03-29	Q1	3	13	88	2017-03-29	30.5678	31.74	29.439	2.301						0		2.301		2017-03-29	30.6422	31.23	30.041	1.189						0		1.189
2017-03-30	Q1	3	13	89	2017-03-30	30.6446	32.253	29.765	2.488						0		2.488		2017-03-30	30.6959	31.281	30.117	1.164						0		1.164
2017-03-31	Q1	3	13	90	2017-03-31	30.7406	32.587	29.59	2.997						0		2.997		2017-03-31	30.7841	31.561	30.016	1.545						0		1.545
2017-04-01	Q2	4	13	91	2017-04-01	30.9416	34.229	29.439	4.79						0		4.79		2017-04-01	30.869	31.765	30.091	1.674						0		1.674
2017-04-02	Q2	4	14	92	2017-04-02	30.7397	33.287	27.481	5.806						0		5.806		2017-04-02	30.8266	31.586	30.091	1.495						0		1.495
2017-04-03	Q2	4	14	93	2017-04-03	30.4765	31.765	28.866	2.899						0		2.899		2017-04-03	30.5022	31.204	29.389	1.815						0		1.815
2017-04-04	Q2	4	14	94	2017-04-04	30.4019	31.74	29.015	2.725						0		2.725		2017-04-04	30.4061	31.077	29.74	1.337						0		1.337
2017-04-05	Q2	4	14	95	2017-04-05	30.3471	31.281	29.24	2.041						0		2.041		2017-04-05	30.3731	31.052	29.615	1.437						0		1.437
2017-04-06	Q2	4	14	96	2017-04-06	30.4733	31.306	29.89	1.416						0		1.416		2017-04-06	30.4267	31.128	29.79	1.338						0		1.338
2017-04-07	Q2	4	14	97	2017-04-07	30.4231	31.204	29.515	1.689						0		1.689		2017-04-07	30.4265	30.849	29.865	0.984						0		0.984
2017-04-08	Q2	4	14	98	2017-04-08	30.4955	30.874	29.865	1.009						0		1.009		2017-04-08	30.5307	30.798	30.167	0.631						0		0.631
2017-04-09	Q2	4	15	99	2017-04-09	30.3769	30.773	29.414	1.359						0		1.359		2017-04-09	30.4608	30.748	29.865	0.883						0		0.883
2017-04-10	Q2	4	15	100	2017-04-10	30.3332	30.697	28.99	1.707						0		1.707		2017-04-10	30.4623	30.646	29.966	0.68						0		0.68
2017-04-11	Q2	4	15	101	2017-04-11	29.9338	30.495	27.186	3.309						0		3.309		2017-04-11	30.1566	30.52	28.518	2.002						0		2.002
2017-04-12	Q2	4	15	102	2017-04-12	29.3334	30.167	25.768	4.399						0		4.399		2017-04-12	29.6769	30.217	28.444	1.773						0		1.773
2017-04-13	Q2	4	15	103	2017-04-13	29.1324	29.815	27.259	2.556						0		2.556		2017-04-13	29.3917	29.865	28.345	1.52						0		1.52
2017-04-14	Q2	4	15	104	2017-04-14	29.2724	29.665	28.345	1.32						0		1.32		2017-04-14	29.3585	29.59	28.816	0.774						0		0.774
2017-04-15	Q2	4	15	105	2017-04-15	29.3622	30.293	28.369	1.924						0		1.924		2017-04-15	29.4009	29.79	29.04	0.75						0		0.75
2017-04-16	Q2	4	16	106	2017-04-16	29.6434	31.179	28.891	2.288						0		2.288		2017-04-16	29.5959	30.217	28.99	1.227						0		1.227
2017-04-17	Q2	4	16	107	2017-04-17	29.9784	31.561	29.34	2.221						0		2.221		2017-04-17	29.9134	30.621	29.29	1.331						0		1.331
2017-04-18	Q2	4	16	108	2017-04-18	30.1773	31.433	29.464	1.969						0		1.969		2017-04-18	30.1576	30.849	29.665	1.184						0		1.184
2017-04-19	Q2	4	16	109	2017-04-19	30.2728	31.179	29.74	1.439						0		1.439		2017-04-19	30.2993	31.103	29.84	1.263						0		1.263
2017-04-20	Q2	4	16	110	2017-04-20	30.3146	30.925	29.765	1.16						0		1.16		2017-04-20	30.3336	30.9	29.966	0.934						0		0.934
2017-04-21	Q2	4	16	111	2017-04-21	30.3399	30.925	29.865	1.06						0		1.06		2017-04-21	30.3299	31.026	29.715	1.311						0		1.311
2017-04-22	Q2	4	16	112	2017-04-22	30.4004	31.052	29.916	1.136						0		1.136		2017-04-22	30.3424	30.925	29.765	1.16						0		1.16
2017-04-23	Q2	4	17	113	2017-04-23	30.4705	30.925	30.041	0.884						0		0.884		2017-04-23	30.5036	30.697	29.991	0.706						0		0.706
2017-04-24	Q2	4	17	114	2017-04-24	30.2627	30.849	28.742	2.107						0		2.107		2017-04-24	30.3668	30.824	29.715	1.109						0		1.109
2017-04-25	Q2	4	17	115	2017-04-25	30.3014	30.748	29.64	1.108						0		1.108		2017-04-25	30.376	30.646	29.916	0.73						0		0.73
2017-04-26	Q2	4	17	116	2017-04-26	29.957	30.444	28.419	2.025						0		2.025		2017-04-26	30.162	30.495	29.54	0.955						0		0.955
2017-04-27	Q2	4	17	117	2017-04-27	29.7609	30.016	28.941	1.075		2017-04-27	29.7578	30.016	28.916	1.1		1.0875		2017-04-27	29.8322	30.243	28.965	1.278						0		1.278
2017-04-28	Q2	4	17	118	2017-04-28	29.2284	29.916	25.695	4.221		2017-04-28	29.228	29.916	25.695	4.221		4.221		2017-04-28	29.3369	29.84	28.048	1.792		2017-04-28	29.4063	29.916	28.122	1.794		1.793
2017-04-29	Q2	4	17	119	2017-04-29	28.8253	29.54	26.378	3.162		2017-04-29	28.8296	29.54	26.402	3.138		3.15		2017-04-29	28.9746	29.515	27.53	1.985		2017-04-29	29.0396	29.59	27.579	2.011		1.998
2017-04-30	Q2	4	18	120	2017-04-30	28.5991	29.24	26.256	2.984		2017-04-30	28.6071	29.24	26.207	3.033		3.0085		2017-04-30	28.6963	29.14	27.505	1.635		2017-04-30	28.7598	29.19	27.554	1.636		1.6355
2017-05-01	Q2	5	18	121	2017-05-01	27.9921	28.816	25.258	3.558		2017-05-01	27.9976	28.816	25.234	3.582		3.57		2017-05-01	28.1887	28.791	27.087	1.704		2017-05-01	28.2444	28.841	27.136	1.705		1.7045
2017-05-02	Q2	5	18	122	2017-05-02	28.0163	28.816	26.867	1.949		2017-05-02	28.0321	28.916	26.867	2.049		1.999		2017-05-02	27.9387	28.369	26.818	1.551		2017-05-02	27.9992	28.444	26.867	1.577		1.564
2017-05-03	Q2	5	18	123	2017-05-03	27.984	28.816	27.186	1.63		2017-05-03	28.0039	28.891	27.186	1.705		1.6675		2017-05-03	27.9075	28.444	27.21	1.234		2017-05-03	27.9672	28.493	27.284	1.209		1.2215
2017-05-04	Q2	5	18	124	2017-05-04	28.0723	28.742	27.087	1.655		2017-05-04	28.0952	28.841	27.087	1.754		1.7045		2017-05-04	28.0425	28.593	27.407	1.186		2017-05-04	28.1051	28.642	27.456	1.186		1.186
2017-05-05	Q2	5	18	125	2017-05-05	27.9961	28.717	27.259	1.458		2017-05-05	28.017	28.766	27.259	1.507		1.4825		2017-05-05	27.9416	28.468	27.063	1.405		2017-05-05	27.9995	28.518	27.112	1.406		1.4055
2017-05-06	Q2	5	18	126	2017-05-06	27.9039	28.345	27.358	0.987		2017-05-06	27.9188	28.419	27.382	1.037		1.012		2017-05-06	27.8425	28.196	26.818	1.378		2017-05-06	27.8998	28.245	26.891	1.354		1.366
2017-05-07	Q2	5	19	127	2017-05-07	27.7582	28.171	26.842	1.329		2017-05-07	27.7711	28.196	26.842	1.354		1.3415		2017-05-07	27.7436	27.998	26.989	1.009		2017-05-07	27.7971	28.048	27.038	1.01		1.0095
2017-05-08	Q2	5	19	128	2017-05-08	27.7889	28.122	26.989	1.133		2017-05-08	27.801	28.122	26.989	1.133		1.133		2017-05-08	27.7898	28.023	27.358	0.665		2017-05-08	27.8486	28.072	27.407	0.665		0.665
2017-05-09	Q2	5	19	129	2017-05-09	27.7078	28.097	26.451	1.646		2017-05-09	27.7184	28.122	26.451	1.671		1.6585		2017-05-09	27.7719	28.048	27.136	0.912		2017-05-09	27.8312	28.122	27.186	0.936		0.924
2017-05-10	Q2	5	19	130	2017-05-10	27.6121	28.048	25.963	2.085		2017-05-10	27.6237	28.072	26.012	2.06		2.0725		2017-05-10	27.7088	28.023	27.014	1.009		2017-05-10	27.7688	28.072	27.087	0.985		0.997
2017-05-11	Q2	5	19	131	2017-05-11	27.7128	28.097	26.622	1.475		2017-05-11	27.7236	28.147	26.549	1.598		1.5365		2017-05-11	27.7654	27.998	27.186	0.812		2017-05-11	27.8282	28.048	27.235	0.813		0.8125
2017-05-12	Q2	5	19	132	2017-05-12	27.7209	28.147	26.671	1.476		2017-05-12	27.7376	28.196	26.598	1.598		1.537		2017-05-12	27.7405	28.048	27.235	0.813		2017-05-12	27.8027	28.122	27.284	0.838		0.8255
2017-05-13	Q2	5	19	133	2017-05-13	27.6111	28.023	26.402	1.621		2017-05-13	27.6319	28.072	26.402	1.67		1.6455		2017-05-13	27.6813	27.974	26.989	0.985		2017-05-13	27.7429	28.023	27.038	0.985		0.985
2017-05-14	Q2	5	20	134	2017-05-14	27.6529	28.122	26.549	1.573		2017-05-14	27.6704	28.171	26.549	1.622		1.5975		2017-05-14	27.6997	28.072	27.21	0.862		2017-05-14	27.7616	28.147	27.259	0.888		0.875
2017-05-15	Q2	5	20	135	2017-05-15	27.6716	28.221	26.304	1.917		2017-05-15	27.6935	28.345	26.304	2.041		1.979		2017-05-15	27.7226	28.196	26.818	1.378		2017-05-15	27.7863	28.295	26.867	1.428		1.403
2017-05-16	Q2	5	20	136	2017-05-16	27.8095	28.941	26.818	2.123		2017-05-16	27.834	29.065	26.818	2.247		2.185		2017-05-16	27.7752	28.468	26.867	1.601		2017-05-16	27.8377	28.568	26.916	1.652		1.6265
2017-05-17	Q2	5	20	137	2017-05-17	27.8465	28.766	26.549	2.217		2017-05-17	27.8716	28.891	26.573	2.318		2.2675		2017-05-17	27.8088	28.419	26.916	1.503		2017-05-17	27.8726	28.493	26.965	1.528		1.5155
2017-05-18	Q2	5	20	138	2017-05-18	27.5947	27.899	26.5	1.399		2017-05-18	27.6113	27.998	26.5	1.498		1.4485		2017-05-18	27.628	27.949	27.038	0.911		2017-05-18	27.6834	27.998	27.112	0.886		0.8985
2017-05-19	Q2	5	20	139	2017-05-19	27.2066	27.628	26.28	1.348		2017-05-19	27.2271	27.727	26.304	1.423		1.3855		2017-05-19	27.2032	27.579	26.28	1.299		2017-05-19	27.2564	27.604	26.353	1.251		1.275
2017-05-20	Q2	5	20	140	2017-05-20	26.9051	27.579	25.623	1.956		2017-05-20	26.9361	27.702	25.647	2.055		2.0055		2017-05-20	26.855	27.456	25.793	1.663		2017-05-20	26.9101	27.505	25.841	1.664		1.6635
2017-05-21	Q2	5	21	141	2017-05-21	27.0073	27.776	25.89	1.886		2017-05-21	27.0305	27.899	25.914	1.985		1.9355		2017-05-21	26.9338	27.431	26.109	1.322		2017-05-21	26.9879	27.481	26.182	1.299		1.3105
2017-05-22	Q2	5	21	142	2017-05-22	27.034	27.751	25.817	1.934		2017-05-22	27.0513	27.825	25.817	2.008		1.971		2017-05-22	26.991	27.431	26.231	1.2		2017-05-22	27.0447	27.456	26.28	1.176		1.188
2017-05-23	Q2	5	21	143	2017-05-23	27.0444	27.579	25.914	1.665		2017-05-23	27.0579	27.628	25.914	1.714		1.6895		2017-05-23	27.0408	27.382	26.304	1.078		2017-05-23	27.0947	27.431	26.353	1.078		1.078
2017-05-24	Q2	5	21	144	2017-05-24	27.1618	27.456	26.72	0.736		2017-05-24	27.1749	27.481	26.744	0.737		0.7365		2017-05-24	27.1449	27.358	26.916	0.442		2017-05-24	27.1994	27.407	26.989	0.418		0.43
2017-05-25	Q2	5	21	145	2017-05-25	27.1738	27.481	26.475	1.006		2017-05-25	27.1866	27.554	26.378	1.176		1.091		2017-05-25	27.1834	27.481	26.867	0.614		2017-05-25	27.2417	27.53	26.916	0.614		0.614
2017-05-26	Q2	5	21	146	2017-05-26	27.3329	27.727	26.646	1.081		2017-05-26	27.3511	27.776	26.671	1.105		1.093		2017-05-26	27.3397	27.604	26.989	0.615		2017-05-26	27.4007	27.677	27.038	0.639		0.627
2017-05-27	Q2	5	21	147	2017-05-27	27.5072	27.949	26.549	1.4		2017-05-27	27.5282	27.998	26.573	1.425		1.4125		2017-05-27	27.5048	27.924	26.867	1.057		2017-05-27	27.5637	27.974	26.916	1.058		1.0575
2017-05-28	Q2	5	22	148	2017-05-28	27.5708	28.023	26.304	1.719		2017-05-28	27.5937	28.147	26.28	1.867		1.793		2017-05-28	27.574	28.023	26.769	1.254		2017-05-28	27.6364	28.122	26.842	1.28		1.267
2017-05-29	Q2	5	22	149	2017-05-29	27.5749	28.147	26.207	1.94		2017-05-29	27.5945	28.32	26.182	2.138		2.039		2017-05-29	27.6051	28.048	26.867	1.181		2017-05-29	27.6654	28.122	26.916	1.206		1.1935
2017-05-30	Q2	5	22	150	2017-05-30	27.6579	28.617	26.304	2.313		2017-05-30	27.686	28.866	26.256	2.61		2.4615		2017-05-30	27.6439	28.27	26.793	1.477		2017-05-30	27.704	28.32	26.842	1.478		1.4775
2017-05-31	Q2	5	22	151	2017-05-31	27.1811	27.776	23.785	3.991		2017-05-31	27.2085	27.949	23.809	4.14		4.0655		2017-05-31	27.3165	27.776	26.28	1.496		2017-05-31	27.371	27.825	26.329	1.496		1.496
2017-06-01	Q2	6	22	152	2017-06-01	26.4901	27.063	23.737	3.326		2017-06-01	26.5106	27.087	23.737	3.35		3.338		2017-06-01	26.6007	27.038	25.647	1.391		2017-06-01	26.6532	27.087	25.695	1.392		1.3915
2017-06-02	Q2	6	22	153	2017-06-02	25.8333	26.451	23.713	2.738		2017-06-02	25.8578	26.598	23.713	2.885		2.8115		2017-06-02	25.7971	26.329	24.847	1.482		2017-06-02	25.8498	26.378	24.895	1.483		1.4825
2017-06-03	Q2	6	22	154	2017-06-03	25.6271	26.353	24.388	1.965		2017-06-03	25.6565	26.524	24.388	2.136		2.0505		2017-06-03	25.5579	26.085	24.508	1.577		2017-06-03	25.6082	26.109	24.557	1.552		1.5645
2017-06-04	Q2	6	23	155	2017-06-04	25.5484	26.182	24.557	1.625		2017-06-04	25.5714	26.329	24.557	1.772		1.6985		2017-06-04	25.4436	25.866	24.388	1.478		2017-06-04	25.4932	25.914	24.436	1.478		1.478
2017-06-05	Q2	6	23	156	2017-06-05	25.692	26.28	24.919	1.361		2017-06-05	25.7072	26.329	24.919	1.41		1.3855		2017-06-05	25.6497	26.036	24.895	1.141		2017-06-05	25.6995	26.061	24.944	1.117		1.129
2017-06-06	Q2	6	23	157	2017-06-06	25.7304	26.061	24.871	1.19		2017-06-06	25.7431	26.109	24.871	1.238		1.214		2017-06-06	25.7092	25.987	25.04	0.947		2017-06-06	25.7619	26.012	25.113	0.899		0.923
2017-06-07	Q2	6	23	158	2017-06-07	25.4415	26.012	24.243	1.769		2017-06-07	25.4552	26.012	24.243	1.769		1.769		2017-06-07	25.5247	25.987	24.726	1.261		2017-06-07	25.5771	26.036	24.774	1.262		1.2615
2017-06-08	Q2	6	23	159	2017-06-08	25.145	25.939	23.256	2.683		2017-06-08	25.1523	25.939	23.28	2.659		2.671		2017-06-08	25.2819	25.89	24.363	1.527		2017-06-08	25.3339	25.963	24.412	1.551		1.539
2017-06-09	Q2	6	23	160	2017-06-09	24.5939	25.574	21.795	3.779		2017-06-09	24.6023	25.598	21.748	3.85		3.8145		2017-06-09	24.8409	25.574	23.905	1.669		2017-06-09	24.8914	25.623	24.026	1.597		1.633
2017-06-10	Q2	6	23	161	2017-06-10	24.1327	25.234	20.865	4.369		2017-06-10	24.1426	25.234	20.865	4.369		4.369		2017-06-10	24.4753	25.234	23.352	1.882		2017-06-10	24.5247	25.283	23.352	1.931		1.9065
2017-06-11	Q2	6	24	162	2017-06-11	24.087	24.944	21.724	3.22		2017-06-11	24.0985	24.944	21.628	3.316		3.268		2017-06-11	24.2946	24.895	23.521	1.374		2017-06-11	24.3439	24.968	23.569	1.399		1.3865
2017-06-12	Q2	6	24	163	2017-06-12	24.3874	25.089	22.681	2.408		2017-06-12	24.4062	25.113	22.633	2.48		2.444		2017-06-12	24.4678	25.04	23.617	1.423		2017-06-12	24.5216	25.089	23.665	1.424		1.4235
2017-06-13	Q2	6	24	164	2017-06-13	24.6444	25.234	23.641	1.593		2017-06-13	24.6714	25.307	23.617	1.69		1.6415		2017-06-13	24.6802	25.162	24.026	1.136		2017-06-13	24.7355	25.21	24.05	1.16		1.148
2017-06-14	Q2	6	24	165	2017-06-14	24.9516	25.525	23.978	1.547		2017-06-14	24.9746	25.647	23.905	1.742		1.6445		2017-06-14	24.9652	25.525	24.195	1.33		2017-06-14	25.0217	25.598	24.243	1.355		1.3425
2017-06-15	Q2	6	24	166	2017-06-15	25.1654	25.963	24.171	1.792		2017-06-15	25.1984	26.109	24.146	1.963		1.8775		2017-06-15	25.1479	25.793	24.436	1.357		2017-06-15	25.2039	25.817	24.484	1.333		1.345
2017-06-16	Q2	6	24	167	2017-06-16	25.236	25.963	24.388	1.575		2017-06-16	25.2661	26.134	24.412	1.722		1.6485		2017-06-16	25.1963	25.72	24.436	1.284		2017-06-16	25.2478	25.744	24.508	1.236		1.26
2017-06-17	Q2	6	24	168	2017-06-17	25.1998	26.012	23.905	2.107		2017-06-17	25.2337	26.182	23.954	2.228		2.1675		2017-06-17	25.1694	25.72	24.388	1.332		2017-06-17	25.2203	25.768	24.436	1.332		1.332
2017-06-18	Q2	6	25	169	2017-06-18	25.196	25.963	24.026	1.937		2017-06-18	25.2283	26.158	24.05	2.108		2.0225		2017-06-18	25.1734	25.671	24.363	1.308		2017-06-18	25.2252	25.72	24.436	1.284		1.296
2017-06-19	Q2	6	25	170	2017-06-19	25.1247	25.963	24.122	1.841		2017-06-19	25.1591	26.109	24.122	1.987		1.914		2017-06-19	25.058	25.574	24.146	1.428		2017-06-19	25.1068	25.598	24.195	1.403		1.4155
2017-06-20	Q2	6	25	171	2017-06-20	25.2309	26.353	24.557	1.796		2017-06-20	25.2559	26.475	24.557	1.918		1.857		2017-06-20	25.0945	25.574	24.243	1.331		2017-06-20	25.1416	25.623	24.315	1.308		1.3195
2017-06-21	Q2	6	25	172	2017-06-21	25.4727	26.426	24.75	1.676		2017-06-21	25.4892	26.451	24.726	1.725		1.7005		2017-06-21	25.3956	25.841	24.871	0.97		2017-06-21	25.4441	25.89	24.919	0.971		0.9705
2017-06-22	Q2	6	25	173	2017-06-22	25.5433	26.012	24.895	1.117		2017-06-22	25.5577	26.061	24.895	1.166		1.1415		2017-06-22	25.5507	25.841	25.162	0.679		2017-06-22	25.6014	25.89	25.21	0.68		0.6795
2017-06-23	Q2	6	25	174	2017-06-23	25.5716	25.914	24.847	1.067		2017-06-23	25.5823	25.963	24.847	1.116		1.0915		2017-06-23	25.5851	25.866	25.113	0.753		2017-06-23	25.6381	25.914	25.162	0.752		0.7525
2017-06-24	Q2	6	25	175	2017-06-24	25.5862	25.89	24.823	1.067		2017-06-24	25.5977	25.963	24.823	1.14		1.1035		2017-06-24	25.6039	25.841	24.992	0.849		2017-06-24	25.6583	25.89	25.04	0.85		0.8495
2017-06-25	Q2	6	26	176	2017-06-25	25.6485	26.109	24.823	1.286		2017-06-25	25.6663	26.158	24.847	1.311		1.2985		2017-06-25	25.6515	25.963	25.065	0.898		2017-06-25	25.709	26.012	25.113	0.899		0.8985
2017-06-26	Q2	6	26	177	2017-06-26	25.7562	26.207	24.871	1.336		2017-06-26	25.7803	26.28	24.895	1.385		1.3605		2017-06-26	25.7419	26.109	25.04	1.069		2017-06-26	25.8028	26.207	25.089	1.118		1.0935
2017-06-27	Q2	6	26	178	2017-06-27	25.7849	26.207	24.774	1.433		2017-06-27	25.8085	26.304	24.798	1.506		1.4695		2017-06-27	25.8111	26.109	25.307	0.802		2017-06-27	25.8709	26.158	25.355	0.803		0.8025
2017-06-28	Q2	6	26	179	2017-06-28	25.137	25.841	21.39	4.451		2017-06-28	25.1659	25.841	21.437	4.404		4.4275		2017-06-28	25.4386	25.793	23.857	1.936		2017-06-28	25.4904	25.866	23.93	1.936		1.936
2017-06-29	Q2	6	26	180	2017-06-29	24.586	25.234	22.178	3.056		2017-06-29	24.6117	25.258	22.154	3.104		3.08		2017-06-29	24.7124	25.234	23.857	1.377		2017-06-29	24.7616	25.283	23.905	1.378		1.3775
2017-06-30	Q2	6	26	181	2017-06-30	24.7726	26.182	22.848	3.334		2017-06-30	24.8024	26.329	22.824	3.505		3.4195		2017-06-30	24.6638	25.283	23.689	1.594		2017-06-30	24.7129	25.307	23.737	1.57		1.582
2017-07-01	Q3	7	26	182	2017-07-01	25.1272	26.475	24.243	2.232		2017-07-01	25.1698	26.695	24.267	2.428		2.33		2017-07-01	25.009	25.72	24.074	1.646		2017-07-01	25.0604	25.744	24.146	1.598		1.622
2017-07-02	Q3	7	27	183	2017-07-02	25.3974	26.598	24.557	2.041		2017-07-02	25.4388	26.793	24.557	2.236		2.1385		2017-07-02	25.2835	25.914	24.653	1.261		2017-07-02	25.3366	25.963	24.702	1.261		1.261
2017-07-03	Q3	7	27	184	2017-07-03	25.3991	26.207	24.605	1.602		2017-07-03	25.4453	26.378	24.653	1.725		1.6635		2017-07-03	25.363	25.866	24.653	1.213		2017-07-03	25.4146	25.89	24.702	1.188		1.2005
2017-07-04	Q3	7	27	185	2017-07-04	25.2736	25.963	24.798	1.165		2017-07-04	25.3036	26.012	24.823	1.189		1.177		2017-07-04	25.2037	25.525	24.532	0.993		2017-07-04	25.2548	25.574	24.581	0.993		0.993
2017-07-05	Q3	7	27	186	2017-07-05	24.8227	25.258	24.219	1.039		2017-07-05	24.8419	25.283	24.219	1.064		1.0515		2017-07-05	24.759	25.234	23.833	1.401		2017-07-05	24.8072	25.283	23.881	1.402		1.4015
2017-07-06	Q3	7	27	187	2017-07-06	24.2981	24.919	23.424	1.495		2017-07-06	24.3117	24.919	23.424	1.495		1.495		2017-07-06	24.3481	24.871	23.472	1.399		2017-07-06	24.3965	24.919	23.521	1.398		1.3985
2017-07-07	Q3	7	27	188	2017-07-07	23.9291	24.484	22.226	2.258		2017-07-07	23.9434	24.508	22.274	2.234		2.246		2017-07-07	23.9691	24.484	22.896	1.588		2017-07-07	24.0172	24.532	22.944	1.588		1.588
2017-07-08	Q3	7	27	189	2017-07-08	23.7769	24.363	22.345	2.018		2017-07-08	23.7907	24.363	22.298	2.065		2.0415		2017-07-08	23.9282	24.315	23.064	1.251		2017-07-08	23.9782	24.363	23.136	1.227		1.239
2017-07-09	Q3	7	28	190	2017-07-09	23.4636	24.219	21.819	2.4		2017-07-09	23.4791	24.219	21.772	2.447		2.4235		2017-07-09	23.6424	24.171	22.705	1.466		2017-07-09	23.6921	24.219	22.776	1.443		1.4545
2017-07-10	Q3	7	28	191	2017-07-10	23.4078	24.026	21.795	2.231		2017-07-10	23.4261	24.074	21.867	2.207		2.219		2017-07-10	23.4995	23.905	22.896	1.009		2017-07-10	23.5526	23.954	22.968	0.986		0.9975
2017-07-11	Q3	7	28	192	2017-07-11	23.8141	24.339	22.992	1.347		2017-07-11	23.8454	24.436	22.992	1.444		1.3955		2017-07-11	23.8266	24.315	23.328	0.987		2017-07-11	23.8835	24.388	23.376	1.012		0.9995
2017-07-12	Q3	7	28	193	2017-07-12	24.1759	24.629	23.593	1.036		2017-07-12	24.2106	24.726	23.641	1.085		1.0605		2017-07-12	24.1909	24.581	23.689	0.892		2017-07-12	24.2482	24.653	23.737	0.916		0.904
2017-07-13	Q3	7	28	194	2017-07-13	24.5838	25.963	23.809	2.154		2017-07-13	24.6285	26.207	23.857	2.35		2.252		2017-07-13	24.4996	25.113	23.857	1.256		2017-07-13	24.5568	25.137	23.905	1.232		1.244
2017-07-14	Q3	7	28	195	2017-07-14	24.6356	25.428	23.136	2.292		2017-07-14	24.6736	25.671	23.112	2.559		2.4255		2017-07-14	24.6532	25.331	24.098	1.233		2017-07-14	24.7073	25.38	24.146	1.234		1.2335
2017-07-15	Q3	7	28	196	2017-07-15	24.5166	25.162	23.208	1.954		2017-07-15	24.5577	25.38	23.232	2.148		2.051		2017-07-15	24.5519	24.895	24.05	0.845		2017-07-15	24.6024	24.944	24.098	0.846		0.8455
2017-07-16	Q3	7	29	197	2017-07-16	24.5364	25.72	23.545	2.175		2017-07-16	24.5884	25.963	23.545	2.418		2.2965		2017-07-16	24.4736	25.04	23.593	1.447		2017-07-16	24.5273	25.065	23.641	1.424		1.4355
2017-07-17	Q3	7	29	198	2017-07-17	24.6522	26.085	23.472	2.613		2017-07-17	24.7074	26.378	23.521	2.857		2.735		2017-07-17	24.5298	25.258	23.761	1.497		2017-07-17	24.5861	25.307	23.809	1.498		1.4975
2017-07-18	Q3	7	29	199	2017-07-18	24.7957	26.256	23.448	2.808		2017-07-18	24.8598	26.549	23.472	3.077		2.9425		2017-07-18	24.6567	25.38	23.881	1.499		2017-07-18	24.709	25.428	23.93	1.498		1.4985
2017-07-19	Q3	7	29	200	2017-07-19	24.7878	25.939	23.809	2.13		2017-07-19	24.8334	26.158	23.833	2.325		2.2275		2017-07-19	24.7056	25.258	24.026	1.232		2017-07-19	24.7537	25.283	24.074	1.209		1.2205
2017-07-20	Q3	7	29	201	2017-07-20	24.9005	26.158	24.267	1.891		2017-07-20	24.9435	26.304	24.267	2.037		1.964		2017-07-20	24.7792	25.307	24.195	1.112		2017-07-20	24.828	25.331	24.243	1.088		1.1
2017-07-21	Q3	7	29	202	2017-07-21	24.8537	25.477	24.122	1.355		2017-07-21	24.878	25.598	24.146	1.452		1.4035		2017-07-21	24.8208	25.162	24.291	0.871		2017-07-21	24.8723	25.21	24.363	0.847		0.859
2017-07-22	Q3	7	29	203	2017-07-22	24.9	25.355	24.267	1.088		2017-07-22	24.9225	25.404	24.315	1.089		1.0885		2017-07-22	24.8925	25.137	24.484	0.653		2017-07-22	24.9441	25.186	24.532	0.654		0.6535
2017-07-23	Q3	7	30	204	2017-07-23	24.8534	25.258	23.713	1.545		2017-07-23	24.868	25.283	23.665	1.618		1.5815		2017-07-23	24.8854	25.21	24.267	0.943		2017-07-23	24.9402	25.258	24.315	0.943		0.943
2017-07-24	Q3	7	30	205	2017-07-24	24.8542	25.258	23.569	1.689		2017-07-24	24.8744	25.307	23.569	1.738		1.7135		2017-07-24	24.8868	25.186	24.026	1.16		2017-07-24	24.9438	25.234	24.074	1.16		1.16
2017-07-25	Q3	7	30	206	2017-07-25	24.6796	25.113	23.04	2.073		2017-07-25	24.6993	25.113	22.968	2.145		2.109		2017-07-25	24.8434	25.089	23.881	1.208		2017-07-25	24.8996	25.137	23.93	1.207		1.2075
2017-07-26	Q3	7	30	207	2017-07-26	24.6032	25.089	23.256	1.833		2017-07-26	24.6341	25.162	23.256	1.906		1.8695		2017-07-26	24.7177	25.065	23.809	1.256		2017-07-26	24.7713	25.113	23.857	1.256		1.256
2017-07-27	Q3	7	30	208	2017-07-27	24.8424	26.256	23.641	2.615		2017-07-27	24.8936	26.573	23.593	2.98		2.7975		2017-07-27	24.8079	25.283	24.05	1.233		2017-07-27	24.866	25.331	24.098	1.233		1.233
2017-07-28	Q3	7	30	209	2017-07-28	25.1642	28.568	23.833	4.735		2017-07-28	25.2194	28.866	23.833	5.033		4.884		2017-07-28	24.9702	25.817	24.146	1.671		2017-07-28	25.0293	25.914	24.195	1.719		1.695
2017-07-29	Q3	7	30	210	2017-07-29	25.3937	28.394	24.171	4.223		2017-07-29	25.4585	28.841	24.291	4.55		4.3865		2017-07-29	25.2021	26.304	24.315	1.989		2017-07-29	25.2603	26.378	24.363	2.015		2.002
2017-07-30	Q3	7	31	211	2017-07-30	25.4894	27.358	24.581	2.777		2017-07-30	25.5516	27.727	24.581	3.146		2.9615		2017-07-30	25.3356	26.134	24.774	1.36		2017-07-30	25.3934	26.182	24.823	1.359		1.3595
2017-07-31	Q3	7	31	212	2017-07-31	25.1187	26.061	24.243	1.818		2017-07-31	25.1709	26.329	24.267	2.062		1.94		2017-07-31	25.0714	25.525	24.122	1.403		2017-07-31	25.1269	25.574	24.171	1.403		1.403
2017-08-01	Q3	8	31	213	2017-08-01	25.0514	25.963	24.026	1.937		2017-08-01	25.1	26.207	24.05	2.157		2.047		2017-08-01	25.005	25.574	24.46	1.114		2017-08-01	25.0563	25.598	24.532	1.066		1.09
2017-08-02	Q3	8	31	214	2017-08-02	23.8031	24.363	22.202	2.161		2017-08-02	23.8139	24.363	22.202	2.161		2.161		2017-08-02	23.6983	24.702	22.489	2.213		2017-08-02	23.7489	24.75	22.537	2.213		2.213
2017-08-03	Q3	8	31	215	2017-08-03	22.6849	22.968	22.321	0.647		2017-08-03	22.6982	22.968	22.345	0.623		0.635		2017-08-03	22.2964	22.776	21.079	1.697		2017-08-03	22.3471	22.824	21.151	1.673		1.685
2017-08-04	Q3	8	31	216	2017-08-04	22.8963	23.472	22.154	1.318		2017-08-04	22.9155	23.569	22.154	1.415		1.3665		2017-08-04	22.7566	23.232	21.819	1.413		2017-08-04	22.808	23.28	21.867	1.413		1.413
2017-08-05	Q3	8	31	217	2017-08-05	23.2107	23.713	22.609	1.104		2017-08-05	23.2254	23.737	22.633	1.104		1.104		2017-08-05	23.1964	23.593	22.489	1.104		2017-08-05	23.2507	23.641	22.561	1.08		1.092
2017-08-06	Q3	8	32	218	2017-08-06	23.3701	23.833	22.393	1.44		2017-08-06	23.3813	23.881	22.393	1.488		1.464		2017-08-06	23.4294	23.785	23.016	0.769		2017-08-06	23.4868	23.833	23.088	0.745		0.757
2017-08-07	Q3	8	32	219	2017-08-07	23.4898	23.881	22.537	1.344		2017-08-07	23.504	23.905	22.465	1.44		1.392		2017-08-07	23.5532	23.809	23.232	0.577		2017-08-07	23.6126	23.857	23.28	0.577		0.577
2017-08-08	Q3	8	32	220	2017-08-08	23.6039	24.074	22.345	1.729		2017-08-08	23.6234	24.171	22.274	1.897		1.813		2017-08-08	23.6539	23.954	23.136	0.818		2017-08-08	23.719	24.05	23.208	0.842		0.83
2017-08-09	Q3	8	32	221	2017-08-09	23.8787	24.677	22.729	1.948		2017-08-09	23.907	24.774	22.729	2.045		1.9965		2017-08-09	23.8599	24.339	23.088	1.251		2017-08-09	23.9242	24.46	23.16	1.3		1.2755
2017-08-10	Q3	8	32	222	2017-08-10	24.0094	25.113	23.088	2.025		2017-08-10	24.0486	25.331	23.136	2.195		2.11		2017-08-10	23.9824	24.508	23.4	1.108		2017-08-10	24.0494	24.629	23.472	1.157		1.1325
2017-08-11	Q3	8	32	223	2017-08-11	24.1037	24.968	23.064	1.904		2017-08-11	24.1382	25.234	23.04	2.194		2.049		2017-08-11	24.1043	24.508	23.569	0.939		2017-08-11	24.1638	24.605	23.617	0.988		0.9635
2017-08-12	Q3	8	32	224	2017-08-12	24.5017	27.604	23.665	3.939		2017-08-12	24.5536	27.875	23.665	4.21		4.0745		2017-08-12	24.3399	25.186	23.617	1.569		2017-08-12	24.4053	25.283	23.665	1.618		1.5935
2017-08-13	Q3	8	33	225	2017-08-13	24.7641	28.667	23.497	5.17		2017-08-13	24.8163	28.916	23.497	5.419		5.2945		2017-08-13	24.5681	25.671	23.93	1.741		2017-08-13	24.6356	25.768	23.978	1.79		1.7655
2017-08-14	Q3	8	33	226	2017-08-14	24.9683	28.99	23.761	5.229		2017-08-14	25.0261	29.315	23.761	5.554		5.3915		2017-08-14	24.6909	25.695	23.785	1.91		2017-08-14	24.7574	25.793	23.833	1.96		1.935
2017-08-15	Q3	8	33	227	2017-08-15	25.0995	27.899	23.713	4.186		2017-08-15	25.1652	28.295	23.737	4.558		4.372		2017-08-15	24.8842	26.134	24.122	2.012		2017-08-15	24.9486	26.207	24.171	2.036		2.024
2017-08-16	Q3	8	33	228	2017-08-16	25.3155	27.604	24.002	3.602		2017-08-16	25.3771	27.924	24.026	3.898		3.75		2017-08-16	25.1119	26.329	24.363	1.966		2017-08-16	25.1766	26.378	24.412	1.966		1.966
2017-08-17	Q3	8	33	229	2017-08-17	25.3448	26.818	24.581	2.237		2017-08-17	25.3956	27.112	24.605	2.507		2.372		2017-08-17	25.1626	25.89	24.605	1.285		2017-08-17	25.2252	25.939	24.653	1.286		1.2855
2017-08-18	Q3	8	33	230	2017-08-18	25.4451	26.94	24.823	2.117		2017-08-18	25.4869	27.136	24.823	2.313		2.215		2017-08-18	25.2252	25.817	24.677	1.14		2017-08-18	25.287	25.89	24.75	1.14		1.14
2017-08-19	Q3	8	33	231	2017-08-19	25.432	26.426	25.016	1.41		2017-08-19	25.4606	26.549	25.016	1.533		1.4715		2017-08-19	25.3244	25.89	24.895	0.995		2017-08-19	25.3849	25.963	24.944	1.019		1.007
2017-08-20	Q3	8	34	232	2017-08-20	25.3885	25.914	24.798	1.116		2017-08-20	25.4093	25.963	24.798	1.165		1.1405		2017-08-20	25.3797	25.671	25.089	0.582		2017-08-20	25.4387	25.72	25.162	0.558		0.57
2017-08-21	Q3	8	34	233	2017-08-21	25.3538	25.817	24.267	1.55		2017-08-21	25.3728	25.841	24.315	1.526		1.538		2017-08-21	25.3997	25.671	24.919	0.752		2017-08-21	25.4622	25.72	24.968	0.752		0.752
2017-08-22	Q3	8	34	234	2017-08-22	25.485	25.939	24.195	1.744		2017-08-22	25.5022	25.987	24.243	1.744		1.744		2017-08-22	25.4932	25.866	24.823	1.043		2017-08-22	25.5572	25.963	24.871	1.092		1.0675
2017-08-23	Q3	8	34	235	2017-08-23	25.7598	26.744	25.04	1.704		2017-08-23	25.7895	26.891	25.065	1.826		1.765		2017-08-23	25.7549	26.353	25.453	0.9		2017-08-23	25.8203	26.475	25.501	0.974		0.937
2017-08-24	Q3	8	34	236	2017-08-24	25.9146	27.949	24.677	3.272		2017-08-24	25.9551	28.221	24.677	3.544		3.408		2017-08-24	25.9054	26.965	25.21	1.755		2017-08-24	25.9765	27.087	25.258	1.829		1.792
2017-08-25	Q3	8	34	237	2017-08-25	26.1657	30.117	25.283	4.834		2017-08-25	26.2098	30.318	25.307	5.011		4.9225		2017-08-25	26.0269	26.989	25.598	1.391		2017-08-25	26.101	27.136	25.647	1.489		1.44
2017-08-26	Q3	8	34	238	2017-08-26	26.3889	31.001	25.162	5.839		2017-08-26	26.4376	31.281	25.162	6.119		5.979		2017-08-26	26.1613	27.235	25.623	1.612		2017-08-26	26.2386	27.407	25.695	1.712		1.662
2017-08-27	Q3	8	35	239	2017-08-27	26.4397	30.066	25.331	4.735		2017-08-27	26.4976	30.318	25.331	4.987		4.861		2017-08-27	26.2395	27.308	25.623	1.685		2017-08-27	26.3151	27.456	25.671	1.785		1.735
2017-08-28	Q3	8	35	240	2017-08-28	26.4487	28.916	25.38	3.536		2017-08-28	26.5118	29.34	25.38	3.96		3.748		2017-08-28	26.3074	27.333	25.647	1.686		2017-08-28	26.3814	27.431	25.72	1.711		1.6985
2017-08-29	Q3	8	35	241	2017-08-29	26.2247	27.628	25.307	2.321		2017-08-29	26.2856	27.998	25.307	2.691		2.506		2017-08-29	26.1266	26.916	25.404	1.512		2017-08-29	26.1957	27.014	25.428	1.586		1.549
2017-08-30	Q3	8	35	242	2017-08-30	26.3288	28.196	25.113	3.083		2017-08-30	26.3954	28.518	25.113	3.405		3.244		2017-08-30	26.1542	27.038	25.501	1.537		2017-08-30	26.2307	27.161	25.574	1.587		1.562
2017-08-31	Q3	8	35	243	2017-08-31	26.3642	27.505	25.72	1.785		2017-08-31	26.4274	27.825	25.72	2.105		1.945		2017-08-31	26.1942	26.94	25.55	1.39		2017-08-31	26.2685	27.038	25.598	1.44		1.415
2017-09-01	Q3	9	35	244	2017-09-01	26.4853	27.259	25.963	1.296		2017-09-01	26.5397	27.407	25.963	1.444		1.37		2017-09-01	26.3466	27.014	25.768	1.246		2017-09-01	26.4239	27.087	25.841	1.246		1.246
2017-09-02	Q3	9	35	245	2017-09-02	26.4382	27.087	25.963	1.124		2017-09-02	26.4775	27.21	25.987	1.223		1.1735		2017-09-02	26.2914	26.695	25.841	0.854		2017-09-02	26.3621	26.769	25.89	0.879		0.8665
2017-09-03	Q3	9	36	246	2017-09-03	26.3633	26.916	25.793	1.123		2017-09-03	26.3903	27.014	25.793	1.221		1.172		2017-09-03	26.3452	26.769	25.89	0.879		2017-09-03	26.4169	26.842	25.963	0.879		0.879
2017-09-04	Q3	9	36	247	2017-09-04	26.0629	26.5	24.992	1.508		2017-09-04	26.0812	26.549	25.016	1.533		1.5205		2017-09-04	26.1569	26.426	25.574	0.852		2017-09-04	26.2209	26.5	25.623	0.877		0.8645
2017-09-05	Q3	9	36	248	2017-09-05	25.8875	26.329	24.267	2.062		2017-09-05	25.8989	26.353	24.363	1.99		2.026		2017-09-05	26.0107	26.304	25.331	0.973		2017-09-05	26.0772	26.353	25.428	0.925		0.949
2017-09-06	Q3	9	36	249	2017-09-06	26.2394	26.769	25.695	1.074		2017-09-06	26.2733	26.867	25.72	1.147		1.1105		2017-09-06	26.2531	26.671	25.987	0.684		2017-09-06	26.318	26.769	26.061	0.708		0.696
2017-09-07	Q3	9	36	250	2017-09-07	26.3705	27.161	25.72	1.441		2017-09-07	26.4062	27.358	25.72	1.638		1.5395		2017-09-07	26.3434	26.744	25.89	0.854		2017-09-07	26.4156	26.891	25.963	0.928		0.891
2017-09-08	Q3	9	36	251	2017-09-08	26.3239	27.21	24.653	2.557		2017-09-08	26.3575	27.53	24.653	2.877		2.717		2017-09-08	26.3584	26.965	25.283	1.682		2017-09-08	26.4266	27.038	25.355	1.683		1.6825
2017-09-09	Q3	9	36	252	2017-09-09	26.444	29.815	23.93	5.885		2017-09-09	26.4959	30.142	23.93	6.212		6.0485		2017-09-09	26.3537	27.308	25.258	2.05		2017-09-09	26.427	27.431	25.331	2.1		2.075
2017-09-10	Q3	9	37	253	2017-09-10	26.5532	29.966	25.089	4.877		2017-09-10	26.6213	30.318	25.089	5.229		5.053		2017-09-10	26.4458	27.382	25.453	1.929		2017-09-10	26.526	27.53	25.525	2.005		1.967
2017-09-11	Q3	9	37	254	2017-09-11	26.7567	31.561	25.283	6.278		2017-09-11	26.8335	32.021	25.307	6.714		6.496		2017-09-11	26.5305	27.85	25.501	2.349		2017-09-11	26.6054	27.974	25.574	2.4		2.3745
2017-09-12	Q3	9	37	255	2017-09-12	26.9172	32.175	25.598	6.577		2017-09-12	26.9776	32.433	25.574	6.859		6.718		2017-09-12	26.5791	27.85	25.695	2.155		2017-09-12	26.6548	27.899	25.744	2.155		2.155
2017-09-13	Q3	9	37	256	2017-09-13	26.9123	31.026	25.258	5.768		2017-09-13	26.9884	31.459	25.38	6.079		5.9235		2017-09-13	26.5979	27.727	25.793	1.934		2017-09-13	26.6725	27.825	25.866	1.959		1.9465
2017-09-14	Q3	9	37	257	2017-09-14	26.6649	28.468	25.598	2.87		2017-09-14	26.7123	28.692	25.623	3.069		2.9695		2017-09-14	26.5375	27.21	26.061	1.149		2017-09-14	26.6032	27.284	26.109	1.175		1.162
2017-09-15	Q3	9	37	258	2017-09-15	26.9114	28.617	26.158	2.459		2017-09-15	26.9704	28.866	26.182	2.684		2.5715		2017-09-15	26.6123	27.53	26.182	1.348		2017-09-15	26.6873	27.604	26.231	1.373		1.3605
2017-09-16	Q3	9	37	259	2017-09-16	27.0383	28.072	26.5	1.572		2017-09-16	27.0888	28.295	26.524	1.771		1.6715		2017-09-16	26.8219	27.333	26.451	0.882		2017-09-16	26.8862	27.382	26.5	0.882		0.882
2017-09-17	Q3	9	38	260	2017-09-17	26.9424	28.023	26.061	1.962		2017-09-17	26.9665	28.072	26.061	2.011		1.9865		2017-09-17	26.854	27.382	25.987	1.395		2017-09-17	26.9188	27.456	26.061	1.395		1.395
2017-09-18	Q3	9	38	261	2017-09-18	26.6784	27.284	25.647	1.637		2017-09-18	26.7023	27.358	25.695	1.663		1.65		2017-09-18	26.7216	27.063	26.109	0.954		2017-09-18	26.7885	27.136	26.158	0.978		0.966
2017-09-19	Q3	9	38	262	2017-09-19	26.5656	27.136	25.186	1.95		2017-09-19	26.5908	27.161	25.283	1.878		1.914		2017-09-19	26.6983	27.186	26.109	1.077		2017-09-19	26.7659	27.259	26.207	1.052		1.0645
2017-09-20	Q3	9	38	263	2017-09-20	26.6749	27.186	25.21	1.976		2017-09-20	26.6984	27.284	25.089	2.195		2.0855		2017-09-20	26.7595	27.21	25.987	1.223		2017-09-20	26.8256	27.284	26.061	1.223		1.223
2017-09-21	Q3	9	38	264	2017-09-21	26.8908	27.875	26.085	1.79		2017-09-21	26.9361	28.147	26.085	2.062		1.926		2017-09-21	26.8814	27.456	26.402	1.054		2017-09-21	26.9499	27.554	26.475	1.079		1.0665
2017-09-22	Q3	9	38	265	2017-09-22	27.0024	28.965	26.012	2.953		2017-09-22	27.0512	29.315	25.987	3.328		3.1405		2017-09-22	26.9622	27.998	26.329	1.669		2017-09-22	27.0324	28.097	26.402	1.695		1.682
2017-09-23	Q3	9	38	266	2017-09-23	27.2058	30.9	26.036	4.864		2017-09-23	27.2601	31.179	26.061	5.118		4.991		2017-09-23	27.0753	28.072	26.451	1.621		2017-09-23	27.1467	28.171	26.5	1.671		1.646
2017-09-24	Q3	9	39	267	2017-09-24	27.347	32.047	25.623	6.424		2017-09-24	27.4034	32.407	25.647	6.76		6.592		2017-09-24	27.1585	28.468	26.085	2.383		2017-09-24	27.2296	28.593	26.158	2.435		2.409
2017-09-25	Q3	9	39	268	2017-09-25	27.3309	31.637	25.768	5.869		2017-09-25	27.3929	31.97	25.866	6.104		5.9865		2017-09-25	27.1238	28.369	26.207	2.162		2017-09-25	27.2003	28.468	26.231	2.237		2.1995
2017-09-26	Q3	9	39	269	2017-09-26	27.4158	31.842	26.085	5.757		2017-09-26	27.4898	32.253	26.158	6.095		5.926		2017-09-26	27.1491	28.419	26.182	2.237		2017-09-26	27.2228	28.493	26.256	2.237		2.237
2017-09-27	Q3	9	39	270	2017-09-27	27.435	30.925	26.085	4.84		2017-09-27	27.507	31.23	26.134	5.096		4.968		2017-09-27	27.1702	28.221	26.573	1.648		2017-09-27	27.2467	28.32	26.646	1.674		1.661
2017-09-28	Q3	9	39	271	2017-09-28	27.4283	29.74	25.866	3.874		2017-09-28	27.5036	30.091	25.89	4.201		4.0375		2017-09-28	27.2338	28.345	26.475	1.87		2017-09-28	27.3145	28.444	26.573	1.871		1.8705
2017-09-29	Q3	9	39	272	2017-09-29	27.5338	29.165	26.353	2.812		2017-09-29	27.6077	29.515	26.378	3.137		2.9745		2017-09-29	27.4653	28.543	26.451	2.092		2017-09-29	27.536	28.617	26.524	2.093		2.0925
2017-09-30	Q3	9	39	273	2017-09-30	27.5227	28.369	27.087	1.282		2017-09-30	27.5849	28.617	27.087	1.53		1.406		2017-09-30	27.4202	28.122	26.867	1.255		2017-09-30	27.4959	28.221	26.94	1.281		1.268
2017-10-01	Q4	10	40	274	2017-10-01	27.379	28.196	26.818	1.378		2017-10-01	27.4172	28.245	26.842	1.403		1.3905		2017-10-01	27.2492	27.677	26.598	1.079		2017-10-01	27.316	27.751	26.671	1.08		1.0795
2017-10-02	Q4	10	40	275	2017-10-02	27.5511	28.171	27.038	1.133		2017-10-02	27.5837	28.27	27.087	1.183		1.158		2017-10-02	27.5138	28.072	26.916	1.156		2017-10-02	27.5839	28.147	26.989	1.158		1.157
2017-10-03	Q4	10	40	276	2017-10-03	27.6769	28.493	27.161	1.332		2017-10-03	27.7041	28.518	27.186	1.332		1.332		2017-10-03	27.716	28.518	27.259	1.259		2017-10-03	27.7847	28.568	27.333	1.235		1.247
2017-10-04	Q4	10	40	277	2017-10-04	27.655	28.023	27.136	0.887		2017-10-04	27.6885	28.196	27.136	1.06		0.9735		2017-10-04	27.6991	28.023	27.358	0.665		2017-10-04	27.7703	28.097	27.431	0.666		0.6655
2017-10-05	Q4	10	40	278	2017-10-05	27.7398	28.27	27.063	1.207		2017-10-05	27.7755	28.394	27.038	1.356		1.2815		2017-10-05	27.7703	28.196	27.407	0.789		2017-10-05	27.8391	28.27	27.481	0.789		0.789
2017-10-06	Q4	10	40	279	2017-10-06	27.9016	29.015	27.063	1.952		2017-10-06	27.9419	29.265	27.063	2.202		2.077		2017-10-06	27.9027	28.568	27.431	1.137		2017-10-06	27.9768	28.667	27.505	1.162		1.1495
2017-10-07	Q4	10	40	280	2017-10-07	28.005	30.091	26.793	3.298		2017-10-07	28.0537	30.444	26.793	3.651		3.4745		2017-10-07	27.9701	28.941	27.259	1.682		2017-10-07	28.0422	29.04	27.308	1.732		1.707
2017-10-08	Q4	10	41	281	2017-10-08	28.1604	31.255	27.087	4.168		2017-10-08	28.205	31.459	27.112	4.347		4.2575		2017-10-08	28.0532	29.115	27.431	1.684		2017-10-08	28.131	29.29	27.505	1.785		1.7345
2017-10-09	Q4	10	41	282	2017-10-09	28.2869	32.458	27.186	5.272		2017-10-09	28.3456	32.768	27.186	5.582		5.427		2017-10-09	28.1305	29.365	27.554	1.811		2017-10-09	28.2126	29.515	27.628	1.887		1.849
2017-10-10	Q4	10	41	283	2017-10-10	28.4808	33.469	26.842	6.627		2017-10-10	28.5446	33.783	26.842	6.941		6.784		2017-10-10	28.2412	29.715	27.235	2.48		2017-10-10	28.3268	29.865	27.284	2.581		2.5305
2017-10-11	Q4	10	41	284	2017-10-11	28.536	33.287	27.087	6.2		2017-10-11	28.6176	33.73	27.136	6.594		6.397		2017-10-11	28.2824	29.565	27.431	2.134		2017-10-11	28.3671	29.715	27.505	2.21		2.172
2017-10-12	Q4	10	41	285	2017-10-12	28.7585	32.82	27.579	5.241		2017-10-12	28.8384	33.365	27.505	5.86		5.5505		2017-10-12	28.3682	29.439	27.505	1.934		2017-10-12	28.4582	29.59	27.554	2.036		1.985
2017-10-13	Q4	10	41	286	2017-10-13	28.6908	30.95	27.579	3.371		2017-10-13	28.7652	31.306	27.579	3.727		3.549		2017-10-13	28.4372	29.265	27.875	1.39		2017-10-13	28.5235	29.389	27.949	1.44		1.415
2017-10-14	Q4	10	41	287	2017-10-14	28.9343	30.318	28.245	2.073		2017-10-14	29.0015	30.672	28.245	2.427		2.25		2017-10-14	28.7343	29.64	28.221	1.419		2017-10-14	28.8188	29.74	28.295	1.445		1.432
2017-10-15	Q4	10	42	288	2017-10-15	29.2173	30.596	28.444	2.152		2017-10-15	29.2766	30.748	28.468	2.28		2.216		2017-10-15	29.1113	30.066	28.468	1.598		2017-10-15	29.1903	30.142	28.543	1.599		1.5985
2017-10-16	Q4	10	42	289	2017-10-16	29.3638	30.343	28.742	1.601		2017-10-16	29.3972	30.52	28.742	1.778		1.6895		2017-10-16	29.35	30.243	28.642	1.601		2017-10-16	29.4217	30.293	28.717	1.576		1.5885
2017-10-17	Q4	10	42	290	2017-10-17	29.0249	29.414	28.32	1.094		2017-10-17	29.048	29.515	28.369	1.146		1.12		2017-10-17	29.0916	29.389	28.766	0.623		2017-10-17	29.1622	29.464	28.841	0.623		0.623
2017-10-18	Q4	10	42	291	2017-10-18	28.8558	29.439	28.147	1.292		2017-10-18	28.8818	29.464	28.171	1.293		1.2925		2017-10-18	28.9308	29.464	28.568	0.896		2017-10-18	29.0012	29.515	28.642	0.873		0.8845
2017-10-19	Q4	10	42	292	2017-10-19	28.7463	29.29	27.875	1.415		2017-10-19	28.7703	29.365	27.924	1.441		1.428		2017-10-19	28.831	29.29	28.394	0.896		2017-10-19	28.9071	29.365	28.468	0.897		0.8965
2017-10-20	Q4	10	42	293	2017-10-20	28.9539	30.066	28.122	1.944		2017-10-20	28.9807	30.167	28.122	2.045		1.9945		2017-10-20	28.9415	29.515	28.593	0.922		2017-10-20	29.016	29.64	28.642	0.998		0.96
2017-10-21	Q4	10	42	294	2017-10-21	29.2528	31.868	28.468	3.4		2017-10-21	29.2894	32.047	28.468	3.579		3.4895		2017-10-21	29.1476	30.167	28.791	1.376		2017-10-21	29.2282	30.293	28.866	1.427		1.4015
2017-10-22	Q4	10	43	295	2017-10-22	29.5218	33.626	28.593	5.033		2017-10-22	29.5537	33.809	28.593	5.216		5.1245		2017-10-22	29.3561	30.419	28.816	1.603		2017-10-22	29.4317	30.52	28.891	1.629		1.616
2017-10-23	Q4	10	43	296	2017-10-23	29.795	34.863	28.742	6.121		2017-10-23	29.8431	35.075	28.766	6.309		6.215		2017-10-23	29.5906	30.874	29.115	1.759		2017-10-23	29.6739	31.001	29.19	1.811		1.785
2017-10-24	Q4	10	43	297	2017-10-24	29.9076	33.704	28.916	4.788		2017-10-24	29.9595	34.019	28.965	5.054		4.921		2017-10-24	29.7449	31.306	29.115	2.191		2017-10-24	29.8205	31.357	29.19	2.167		2.179
2017-10-25	Q4	10	43	298	2017-10-25	29.9792	34.071	28.742	5.329		2017-10-25	30.04	34.572	28.742	5.83		5.5795		2017-10-25	29.7816	31.179	29.19	1.989		2017-10-25	29.8549	31.23	29.265	1.965		1.977
2017-10-26	Q4	10	43	299	2017-10-26	29.888	32.124	28.891	3.233		2017-10-26	29.9505	32.433	28.916	3.517		3.375		2017-10-26	29.7567	30.976	29.065	1.911		2017-10-26	29.8242	31.026	29.14	1.886		1.8985
2017-10-27	Q4	10	43	300	2017-10-27	29.959	32.073	29.265	2.808		2017-10-27	30.0279	32.433	29.29	3.143		2.9755		2017-10-27	29.8115	31.23	29.24	1.99		2017-10-27	29.8798	31.255	29.315	1.94		1.965
2017-10-28	Q4	10	43	301	2017-10-28	29.9232	31.408	29.365	2.043		2017-10-28	29.9947	31.893	29.389	2.504		2.2735		2017-10-28	29.7747	31.128	29.24	1.888		2017-10-28	29.8446	31.153	29.315	1.838		1.863
2017-10-29	Q4	10	44	302	2017-10-29	29.9221	30.95	29.315	1.635		2017-10-29	29.988	31.255	29.315	1.94		1.7875		2017-10-29	29.8321	31.128	29.265	1.863		2017-10-29	29.9147	31.179	29.34	1.839		1.851
2017-10-30	Q4	10	44	303	2017-10-30	29.8997	30.773	29.265	1.508		2017-10-30	29.9619	30.925	29.29	1.635		1.5715		2017-10-30	29.7842	30.596	29.265	1.331		2017-10-30	29.8654	30.672	29.365	1.307		1.319
2017-10-31	Q4	10	44	304	2017-10-31	29.7732	30.697	29.464	1.233		2017-10-31	29.8114	30.697	29.464	1.233		1.233		2017-10-31	29.7015	30.192	29.34	0.852		2017-10-31	29.7802	30.268	29.414	0.854		0.853
2017-11-01	Q4	11	44	305	2017-11-01	29.716	30.369	29.265	1.104		2017-11-01	29.7421	30.369	29.265	1.104		1.104		2017-11-01	29.6961	30.016	29.389	0.627		2017-11-01	29.7753	30.091	29.49	0.601		0.614
2017-11-02	Q4	11	44	306	2017-11-02	29.5147	29.966	28.419	1.547		2017-11-02	29.535	30.016	28.369	1.647		1.597		2017-11-02	29.5457	29.916	28.841	1.075		2017-11-02	29.6192	29.966	28.916	1.05		1.0625
2017-11-03	Q4	11	44	307	2017-11-03	29.6341	30.041	28.941	1.1		2017-11-03	29.6594	30.066	29.065	1.001		1.0505		2017-11-03	29.6574	29.991	29.24	0.751		2017-11-03	29.7349	30.066	29.34	0.726		0.7385
2017-11-04	Q4	11	44	308	2017-11-04	29.7534	30.167	28.916	1.251		2017-11-04	29.7882	30.369	28.916	1.453		1.352		2017-11-04	29.8058	30.369	29.24	1.129		2017-11-04	29.8896	30.444	29.315	1.129		1.129
2017-11-05	Q4	11	45	309	2017-11-05	29.9392	32.073	28.766	3.307		2017-11-05	29.9859	32.587	28.766	3.821		3.564		2017-11-05	29.9111	30.748	29.414	1.334		2017-11-05	29.9948	30.824	29.464	1.36		1.347
2017-11-06	Q4	11	45	310	2017-11-06	30.058	32.278	29.015	3.263		2017-11-06	30.0945	32.458	28.941	3.517		3.39		2017-11-06	30.01	30.874	29.565	1.309		2017-11-06	30.0944	30.976	29.665	1.311		1.31
2017-11-07	Q4	11	45	311	2017-11-07	30.1238	33.261	29.215	4.046		2017-11-07	30.1739	33.757	29.24	4.517		4.2815		2017-11-07	30.0202	30.798	29.565	1.233		2017-11-07	30.1051	30.9	29.64	1.26		1.2465
2017-11-08	Q4	11	45	312	2017-11-08	30.3596	35.448	29.34	6.108		2017-11-08	30.4241	35.77	29.365	6.405		6.2565		2017-11-08	30.1147	31.408	29.464	1.944		2017-11-08	30.2019	31.51	29.54	1.97		1.957
2017-11-09	Q4	11	45	313	2017-11-09	30.4991	35.049	29.215	5.834		2017-11-09	30.5826	35.609	29.265	6.344		6.089		2017-11-09	30.2382	31.765	29.615	2.15		2017-11-09	30.3188	31.842	29.69	2.152		2.151
2017-11-10	Q4	11	45	314	2017-11-10	30.4753	34.519	29.49	5.029		2017-11-10	30.5452	34.916	29.515	5.401		5.215		2017-11-10	30.1853	31.179	29.515	1.664		2017-11-10	30.2668	31.23	29.615	1.615		1.6395
2017-11-11	Q4	11	45	315	2017-11-11	30.5078	33.235	29.365	3.87		2017-11-11	30.5884	33.652	29.365	4.287		4.0785		2017-11-11	30.244	31.408	29.59	1.818		2017-11-11	30.3245	31.459	29.665	1.794		1.806
2017-11-12	Q4	11	46	316	2017-11-12	30.4616	32.047	29.615	2.432		2017-11-12	30.5307	32.33	29.64	2.69		2.561		2017-11-12	30.3478	31.459	29.439	2.02		2017-11-12	30.4237	31.535	29.515	2.02		2.02
2017-11-13	Q4	11	46	317	2017-11-13	30.3446	31.586	29.74	1.846		2017-11-13	30.4071	31.868	29.74	2.128		1.987		2017-11-13	30.3035	31.255	29.69	1.565		2017-11-13	30.3784	31.331	29.765	1.566		1.5655
2017-11-14	Q4	11	46	318	2017-11-14	30.1554	30.646	29.715	0.931		2017-11-14	30.1896	30.925	29.64	1.285		1.108		2017-11-14	30.1598	30.571	29.79	0.781		2017-11-14	30.237	30.621	29.865	0.756		0.7685
2017-11-15	Q4	11	46	319	2017-11-15	29.9262	30.343	28.692	1.651		2017-11-15	29.9563	30.495	28.791	1.704		1.6775		2017-11-15	29.9884	30.243	29.439	0.804		2017-11-15	30.0664	30.318	29.515	0.803		0.8035
2017-11-16	Q4	11	46	320	2017-11-16	29.9528	30.444	29.19	1.254		2017-11-16	29.9772	30.495	29.19	1.305		1.2795		2017-11-16	29.9806	30.419	29.464	0.955		2017-11-16	30.0634	30.469	29.565	0.904		0.9295
2017-11-17	Q4	11	46	321	2017-11-17	29.965	30.52	29.165	1.355		2017-11-17	29.9871	30.596	29.215	1.381		1.368		2017-11-17	30.0288	30.52	29.464	1.056		2017-11-17	30.1109	30.596	29.565	1.031		1.0435
2017-11-18	Q4	11	46	322	2017-11-18	30.1208	30.95	29.065	1.885		2017-11-18	30.1457	30.976	29.14	1.836		1.8605		2017-11-18	30.1335	30.621	29.49	1.131		2017-11-18	30.2205	30.748	29.59	1.158		1.1445
2017-11-19	Q4	11	47	323	2017-11-19	30.1341	30.596	29.665	0.931		2017-11-19	30.1604	30.722	29.64	1.082		1.0065		2017-11-19	30.171	30.571	29.84	0.731		2017-11-19	30.2516	30.672	29.916	0.756		0.7435
2017-11-20	Q4	11	47	324	2017-11-20	30.45	32.381	29.74	2.641		2017-11-20	30.4836	32.742	29.765	2.977		2.809		2017-11-20	30.3854	31.026	29.941	1.085		2017-11-20	30.4728	31.153	30.016	1.137		1.111
2017-11-21	Q4	11	47	325	2017-11-21	30.6156	32.691	30.091	2.6		2017-11-21	30.6596	32.975	30.117	2.858		2.729		2017-11-21	30.5328	31.357	30.142	1.215		2017-11-21	30.6226	31.484	30.217	1.267		1.241
2017-11-22	Q4	11	47	326	2017-11-22	30.8787	34.757	30.192	4.565		2017-11-22	30.9117	34.836	30.217	4.619		4.592		2017-11-22	30.6749	31.637	30.243	1.394		2017-11-22	30.7624	31.74	30.318	1.422		1.408
2017-11-23	Q4	11	47	327	2017-11-23	31.1294	36.039	29.865	6.174		2017-11-23	31.1615	36.039	29.916	6.123		6.1485		2017-11-23	30.832	31.97	30.217	1.753		2017-11-23	30.9198	32.098	30.293	1.805		1.779
2017-11-24	Q4	11	47	328	2017-11-24	30.8392	31.765	30.217	1.548		2017-11-24	30.878	32.15	30.217	1.933		1.7405		2017-11-24	30.7944	31.689	30.469	1.22		2017-11-24	30.8776	31.765	30.545	1.22		1.22
2017-11-25	Q4	11	47	329	2017-11-25	31.0863	33.287	30.369	2.918		2017-11-25	31.1494	33.6	30.394	3.206		3.062		2017-11-25	30.9422	32.021	30.167	1.854		2017-11-25	31.0225	32.073	30.243	1.83		1.842
2017-11-26	Q4	11	48	330	2017-11-26	31.1714	33.365	30.52	2.845		2017-11-26	31.2302	33.704	30.545	3.159		3.002		2017-11-26	30.967	32.33	30.419	1.911		2017-11-26	31.0524	32.407	30.495	1.912		1.9115
2017-11-27	Q4	11	48	331	2017-11-27	31.2024	32.562	30.621	1.941		2017-11-27	31.2551	32.794	30.621	2.173		2.057		2017-11-27	31.1182	32.51	30.369	2.141		2017-11-27	31.1931	32.536	30.444	2.092		2.1165
2017-11-28	Q4	11	48	332	2017-11-28	31.1922	32.175	30.672	1.503		2017-11-28	31.2437	32.433	30.672	1.761		1.632		2017-11-28	31.1138	32.098	30.646	1.452		2017-11-28	31.1881	32.15	30.722	1.428		1.44
2017-11-29	Q4	11	48	333	2017-11-29	31.1301	32.201	30.646	1.555		2017-11-29	31.1771	32.278	30.646	1.632		1.5935		2017-11-29	31.0701	31.893	30.621	1.272		2017-11-29	31.1433	31.919	30.697	1.222		1.247
2017-11-30	Q4	11	48	334	2017-11-30	31.0496	31.944	30.419	1.525		2017-11-30	31.0878	32.124	30.419	1.705		1.615		2017-11-30	31.0104	31.765	30.343	1.422		2017-11-30	31.0857	31.791	30.419	1.372		1.397
2017-12-01	Q4	12	48	335	2017-12-01	31.043	31.74	30.545	1.195		2017-12-01	31.0669	31.765	30.52	1.245		1.22		2017-12-01	31.0088	31.306	30.697	0.609		2017-12-01	31.0871	31.357	30.773	0.584		0.5965
2017-12-02	Q4	12	48	336	2017-12-02	31.1403	31.663	30.621	1.042		2017-12-02	31.1628	31.663	30.672	0.991		1.0165		2017-12-02	31.1183	31.459	30.798	0.661		2017-12-02	31.2019	31.51	30.874	0.636		0.6485
2017-12-03	Q4	12	49	337	2017-12-03	31.1333	31.561	30.545	1.016		2017-12-03	31.1593	31.612	30.545	1.067		1.0415		2017-12-03	31.1798	31.51	30.722	0.788		2017-12-03	31.2653	31.612	30.798	0.814		0.801
2017-12-04	Q4	12	49	338	2017-12-04	31.3684	32.742	30.646	2.096		2017-12-04	31.4005	32.975	30.621	2.354		2.225		2017-12-04	31.35	32.021	30.824	1.197		2017-12-04	31.4409	32.175	30.9	1.275		1.236
2017-12-05	Q4	12	49	339	2017-12-05	31.4852	34.73	30.571	4.159		2017-12-05	31.5297	34.995	30.571	4.424		4.2915		2017-12-05	31.3875	32.458	30.824	1.634		2017-12-05	31.4749	32.587	30.925	1.662		1.648
2017-12-06	Q4	12	49	340	2017-12-06	31.2682	32.82	30.394	2.426		2017-12-06	31.2949	33.105	30.369	2.736		2.581		2017-12-06	31.2324	32.484	30.672	1.812		2017-12-06	31.3175	32.587	30.773	1.814		1.813
2017-12-07	Q4	12	49	341	2017-12-07	31.4001	34.281	30.469	3.812		2017-12-07	31.4416	34.44	30.495	3.945		3.8785		2017-12-07	31.23	32.381	30.621	1.76		2017-12-07	31.3154	32.484	30.697	1.787		1.7735
2017-12-08	Q4	12	49	342	2017-12-08	31.633	36.661	30.571	6.09		2017-12-08	31.6842	36.933	30.596	6.337		6.2135		2017-12-08	31.3046	32.82	30.722	2.098		2017-12-08	31.3924	32.924	30.798	2.126		2.112
2017-12-09	Q4	12	49	343	2017-12-09	31.7715	36.471	30.571	5.9		2017-12-09	31.8366	36.878	30.571	6.307		6.1035		2017-12-09	31.4404	33.027	30.722	2.305		2017-12-09	31.5238	33.079	30.798	2.281		2.293
2017-12-10	Q4	12	50	344	2017-12-10	31.4431	33.053	30.117	2.936		2017-12-10	31.4869	33.339	30.142	3.197		3.0665		2017-12-10	31.2917	32.15	30.596	1.554		2017-12-10	31.3675	32.175	30.672	1.503		1.5285
2017-12-11	Q4	12	50	345	2017-12-11	31.6325	34.124	31.077	3.047		2017-12-11	31.677	34.492	31.077	3.415		3.231		2017-12-11	31.445	32.458	31.052	1.406		2017-12-11	31.5265	32.51	31.128	1.382		1.394
2017-12-12	Q4	12	50	346	2017-12-12	31.666	33.209	30.9	2.309		2017-12-12	31.7273	33.469	30.925	2.544		2.4265		2017-12-12	31.5791	32.433	30.773	1.66		2017-12-12	31.6593	32.51	30.849	1.661		1.6605
2017-12-13	Q4	12	50	347	2017-12-13	31.6194	32.613	30.824	1.789		2017-12-13	31.6574	32.742	30.824	1.918		1.8535		2017-12-13	31.5897	32.201	30.773	1.428		2017-12-13	31.6694	32.278	30.874	1.404		1.416
2017-12-14	Q4	12	50	348	2017-12-14	31.4977	32.021	30.646	1.375		2017-12-14	31.5289	32.15	30.621	1.529		1.452		2017-12-14	31.4981	31.893	30.925	0.968		2017-12-14	31.5775	31.97	31.001	0.969		0.9685
2017-12-15	Q4	12	50	349	2017-12-15	31.3281	31.637	30.824	0.813		2017-12-15	31.3557	31.689	30.849	0.84		0.8265		2017-12-15	31.3524	31.586	30.824	0.762		2017-12-15	31.4338	31.637	30.9	0.737		0.7495
2017-12-16	Q4	12	50	350	2017-12-16	31.3209	31.816	30.596	1.22		2017-12-16	31.3512	31.868	30.621	1.247		1.2335		2017-12-16	31.3284	31.791	30.976	0.815		2017-12-16	31.4096	31.868	31.077	0.791		0.803
2017-12-17	Q4	12	51	351	2017-12-17	31.3792	31.919	30.722	1.197		2017-12-17	31.4164	32.047	30.722	1.325		1.261		2017-12-17	31.3892	31.842	30.976	0.866		2017-12-17	31.4741	31.97	31.077	0.893		0.8795
2017-12-18	Q4	12	51	352	2017-12-18	31.4174	31.996	30.621	1.375		2017-12-18	31.4557	32.073	30.646	1.427		1.401		2017-12-18	31.4421	31.868	30.9	0.968		2017-12-18	31.5266	31.97	30.95	1.02		0.994
2017-12-19	Q4	12	51	353	2017-12-19	31.5104	32.613	30.318	2.295		2017-12-19	31.5491	32.82	30.419	2.401		2.348		2017-12-19	31.4973	32.047	30.874	1.173		2017-12-19	31.5781	32.124	30.95	1.174		1.1735
2017-12-20	Q4	12	51	354	2017-12-20	31.6077	33.626	30.748	2.878		2017-12-20	31.6577	34.019	30.748	3.271		3.0745		2017-12-20	31.5573	32.33	31.179	1.151		2017-12-20	31.6455	32.484	31.255	1.229		1.19
2017-12-21	Q4	12	51	355	2017-12-21	31.6835	33.704	30.798	2.906		2017-12-21	31.7347	34.071	30.824	3.247		3.0765		2017-12-21	31.5885	32.253	31.103	1.15		2017-12-21	31.671	32.355	31.179	1.176		1.163
2017-12-22	Q4	12	51	356	2017-12-22	32.0356	36.715	30.9	5.815		2017-12-22	32.0747	36.905	30.925	5.98		5.8975		2017-12-22	31.7793	32.794	31.382	1.412		2017-12-22	31.8716	32.924	31.459	1.465		1.4385
2017-12-23	Q4	12	51	357	2017-12-23	31.701	33.287	30.117	3.17		2017-12-23	31.7497	33.626	30.117	3.509		3.3395		2017-12-23	31.7175	32.562	31.103	1.459		2017-12-23	31.7967	32.613	31.179	1.434		1.4465
2017-12-24	Q4	12	52	358	2017-12-24	31.818	34.229	30.773	3.456		2017-12-24	31.8939	34.81	30.849	3.961		3.7085		2017-12-24	31.7018	32.691	30.9	1.791		2017-12-24	31.7844	32.768	31.001	1.767		1.779
2017-12-25	Q4	12	52	359	2017-12-25	31.9908	34.36	31.204	3.156		2017-12-25	32.0777	34.81	31.204	3.606		3.381		2017-12-25	31.8152	32.872	31.128	1.744		2017-12-25	31.8997	32.924	31.23	1.694		1.719
2017-12-26	Q4	12	52	360	2017-12-26	31.7984	32.949	31.077	1.872		2017-12-26	31.8619	33.339	31.077	2.262		2.067		2017-12-26	31.7368	32.51	30.925	1.585		2017-12-26	31.8141	32.536	31.026	1.51		1.5475
2017-12-27	Q4	12	52	361	2017-12-27	30.4638	31.026	29.365	1.661		2017-12-27	30.4716	31.026	29.389	1.637		1.649		2017-12-27	30.447	31.026	29.165	1.861		2017-12-27	30.5238	31.103	29.265	1.838		1.8495
2017-12-28	Q4	12	52	362	2017-12-28	30.0086	30.369	29.49	0.879		2017-12-28	30.0181	30.369	29.49	0.879		0.879		2017-12-28	29.9703	30.369	29.515	0.854		2017-12-28	30.0458	30.444	29.59	0.854		0.854
2017-12-29	Q4	12	52	363	2017-12-29	29.7306	30.066	29.365	0.701		2017-12-29	29.7433	30.091	29.365	0.726		0.7135		2017-12-29	29.7282	30.066	29.315	0.751		2017-12-29	29.8055	30.142	29.389	0.753		0.752
2017-12-30	Q4	12	52	364	2017-12-30	29.8294	30.117	29.315	0.802		2017-12-30	29.8426	30.117	29.315	0.802		0.802		2017-12-30	29.8255	30.066	29.439	0.627		2017-12-30	29.9011	30.142	29.515	0.627		0.627
2017-12-31	Q4	12	53	365	2017-12-31	30.181	30.95	29.54	1.41		2017-12-31	30.2089	31.026	29.54	1.486		1.448		2017-12-31	30.1427	30.672	29.69	0.982		2017-12-31	30.2182	30.722	29.765	0.957		0.9695
2018-01-01	Q1	1	1	1	2018-01-01	30.5279	31.052	30.066	0.986		2018-01-01	30.5656	31.128	30.117	1.011		0.9985		2018-01-01	30.5076	30.9	30.217	0.683		2018-01-01	30.5915	30.976	30.318	0.658		0.6705
2018-01-02	Q1	1	1	2	2018-01-02	30.2275	30.646	27.949	2.697		2018-01-02	30.2423	30.672	28.023	2.649		2.673		2018-01-02	30.4302	30.646	29.59	1.056		2018-01-02	30.5052	30.722	29.665	1.057		1.0565
2018-01-03	Q1	1	1	3	2018-01-03	30.567	32.82	29.34	3.48		2018-01-03	30.62	33.339	29.34	3.999		3.7395		2018-01-03	30.5175	31.382	29.615	1.767		2018-01-03	30.6026	31.459	29.69	1.769		1.768
2018-01-04	Q1	1	1	4	2018-01-04	30.8872	33.809	29.54	4.269		2018-01-04	30.9351	34.281	29.49	4.791		4.53		2018-01-04	30.8126	31.612	30.293	1.319		2018-01-04	30.8977	31.791	30.369	1.422		1.3705
2018-01-05	Q1	1	1	5	2018-01-05	31.1527	35.315	30.091	5.224		2018-01-05	31.2161	35.636	30.091	5.545		5.3845		2018-01-05	30.9478	31.944	30.52	1.424		2018-01-05	31.0314	32.047	30.596	1.451		1.4375
2018-01-06	Q1	1	1	6	2018-01-06	31.5165	37.343	28.891	8.452		2018-01-06	31.5674	37.535	28.866	8.669		8.5605		2018-01-06	31.3128	32.975	30.621	2.354		2018-01-06	31.3943	33.027	30.672	2.355		2.3545
2018-01-07	Q1	1	2	7	2018-01-07	31.4929	36.769	29.815	6.954		2018-01-07	31.5322	36.824	29.79	7.034		6.994		2018-01-07	31.1992	32.613	30.066	2.547		2018-01-07	31.2803	32.691	30.167	2.524		2.5355
2018-01-08	Q1	1	2	8	2018-01-08	31.1361	32.794	29.991	2.803		2018-01-08	31.1717	33.053	29.991	3.062		2.9325		2018-01-08	31.0492	31.816	29.916	1.9		2018-01-08	31.1206	31.868	29.966	1.902		1.901
2018-01-09	Q1	1	2	9	2018-01-09	30.4795	30.773	29.941	0.832		2018-01-09	30.4924	30.773	29.991	0.782		0.807		2018-01-09	30.528	30.748	30.217	0.531		2018-01-09	30.6014	30.824	30.293	0.531		0.531
2018-01-10	Q1	1	2	10	2018-01-10	30.2541	30.495	29.89	0.605		2018-01-10	30.2675	30.52	29.89	0.63		0.6175		2018-01-10	30.277	30.469	29.966	0.503		2018-01-10	30.3492	30.545	30.016	0.529		0.516
2018-01-11	Q1	1	2	11	2018-01-11	29.704	30.016	28.891	1.125		2018-01-11	29.7158	30.066	28.891	1.175		1.15		2018-01-11	29.6823	30.016	29.015	1.001		2018-01-11	29.7544	30.091	29.09	1.001		1.001
2018-01-12	Q1	1	2	12	2018-01-12	29.3874	29.74	28.916	0.824		2018-01-12	29.396	29.74	28.916	0.824		0.824		2018-01-12	29.3715	29.74	28.866	0.874		2018-01-12	29.4428	29.815	28.941	0.874		0.874
2018-01-13	Q1	1	2	13	2018-01-13	29.5071	29.84	28.841	0.999		2018-01-13	29.5196	29.84	28.866	0.974		0.9865		2018-01-13	29.4897	29.715	29.115	0.6		2018-01-13	29.5652	29.79	29.19	0.6		0.6
2018-01-14	Q1	1	3	14	2018-01-14	29.7991	30.646	29.165	1.481		2018-01-14	29.8236	30.621	29.19	1.431		1.456		2018-01-14	29.7747	30.293	29.414	0.879		2018-01-14	29.8484	30.369	29.515	0.854		0.8665
2018-01-15	Q1	1	3	15	2018-01-15	30.0711	30.469	29.815	0.654		2018-01-15	30.0903	30.596	29.815	0.781		0.7175		2018-01-15	30.0741	30.369	29.916	0.453		2018-01-15	30.1523	30.469	29.966	0.503		0.478
2018-01-16	Q1	1	3	16	2018-01-16	30.2471	30.672	29.615	1.057		2018-01-16	30.2758	30.824	29.615	1.209		1.133		2018-01-16	30.264	30.621	30.016	0.605		2018-01-16	30.342	30.748	30.091	0.657		0.631
2018-01-17	Q1	1	3	17	2018-01-17	30.1579	30.444	29.115	1.329		2018-01-17	30.1788	30.469	29.14	1.329		1.329		2018-01-17	30.2487	30.394	29.815	0.579		2018-01-17	30.3209	30.469	29.89	0.579		0.579
2018-01-18	Q1	1	3	18	2018-01-18	30.5232	31.663	30.142	1.521		2018-01-18	30.5624	31.97	30.192	1.778		1.6495		2018-01-18	30.477	31.077	30.217	0.86		2018-01-18	30.5531	31.179	30.293	0.886		0.873
2018-01-19	Q1	1	3	19	2018-01-19	30.6992	33.391	30.016	3.375		2018-01-19	30.7439	33.757	30.041	3.716		3.5455		2018-01-19	30.5991	31.433	30.243	1.19		2018-01-19	30.6798	31.535	30.318	1.217		1.2035
2018-01-20	Q1	1	3	20	2018-01-20	30.5603	32.124	29.34	2.784		2018-01-20	30.6073	32.355	29.365	2.99		2.887		2018-01-20	30.5658	31.153	29.916	1.237		2018-01-20	30.643	31.255	29.991	1.264		1.2505
2018-01-21	Q1	1	4	21	2018-01-21	30.8736	33.73	29.865	3.865		2018-01-21	30.94	34.124	29.89	4.234		4.0495		2018-01-21	30.7721	31.561	30.192	1.369		2018-01-21	30.8519	31.689	30.268	1.421		1.395
2018-01-22	Q1	1	4	22	2018-01-22	31.0117	33.861	29.24	4.621		2018-01-22	31.0866	34.36	29.215	5.145		4.883		2018-01-22	30.942	32.15	30.142	2.008		2018-01-22	31.0176	32.201	30.217	1.984		1.996
2018-01-23	Q1	1	4	23	2018-01-23	31.1277	34.572	29.865	4.707		2018-01-23	31.2077	35.049	29.865	5.184		4.9455		2018-01-23	30.9035	31.919	29.966	1.953		2018-01-23	30.9838	32.021	30.041	1.98		1.9665
2018-01-24	Q1	1	4	24	2018-01-24	31.3406	33.704	30.394	3.31		2018-01-24	31.4107	34.124	30.419	3.705		3.5075		2018-01-24	31.1962	32.201	30.545	1.656		2018-01-24	31.2667	32.253	30.621	1.632		1.644
2018-01-25	Q1	1	4	25	2018-01-25	31.2845	33.131	30.545	2.586		2018-01-25	31.3625	33.495	30.545	2.95		2.768		2018-01-25	31.2028	32.201	30.545	1.656		2018-01-25	31.2682	32.253	30.621	1.632		1.644
2018-01-26	Q1	1	4	26	2018-01-26	30.7138	30.925	30.192	0.733		2018-01-26	30.7447	30.95	30.243	0.707		0.72		2018-01-26	30.7751	31.026	30.469	0.557		2018-01-26	30.8459	31.103	30.545	0.558		0.5575
2018-01-27	Q1	1	4	27	2018-01-27	30.4241	30.621	30.041	0.58		2018-01-27	30.4541	30.748	30.066	0.682		0.631		2018-01-27	30.4368	30.672	29.991	0.681		2018-01-27	30.5067	30.722	30.066	0.656		0.6685
2018-01-28	Q1	1	5	28	2018-01-28	29.9222	30.394	29.365	1.029		2018-01-28	29.9353	30.419	29.365	1.054		1.0415		2018-01-28	29.9658	30.394	29.414	0.98		2018-01-28	30.037	30.469	29.49	0.979		0.9795
2018-01-29	Q1	1	5	29	2018-01-29	28.916	30.016	27.604	2.412		2018-01-29	28.9212	30.016	27.604	2.412		2.412		2018-01-29	29.0045	29.991	27.456	2.535		2018-01-29	29.0765	30.066	27.53	2.536		2.5355
2018-01-30	Q1	1	5	30	2018-01-30	28.6805	29.49	27.358	2.132		2018-01-30	28.6927	29.515	27.382	2.133		2.1325		2018-01-30	28.7094	29.49	27.382	2.108		2018-01-30	28.7789	29.565	27.456	2.109		2.1085
2018-01-31	Q1	1	5	31	2018-01-31	28.6925	29.29	27.924	1.366		2018-01-31	28.7082	29.315	27.998	1.317		1.3415		2018-01-31	28.6841	29.265	28.023	1.242		2018-01-31	28.7551	29.34	28.097	1.243		1.2425
2018-02-01	Q1	2	5	32	2018-02-01	28.755	29.015	28.295	0.72		2018-02-01	28.7808	29.115	28.295	0.82		0.77		2018-02-01	28.7441	28.99	28.32	0.67		2018-02-01	28.8131	29.065	28.394	0.671		0.6705
2018-02-02	Q1	2	5	33	2018-02-02	28.9764	30.369	28.171	2.198		2018-02-02	29.0166	30.571	28.171	2.4		2.299		2018-02-02	28.9184	29.54	28.518	1.022		2018-02-02	28.9901	29.59	28.593	0.997		1.0095
2018-02-03	Q1	2	5	34	2018-02-03	29.2834	31.51	28.171	3.339		2018-02-03	29.3373	32.021	28.147	3.874		3.6065		2018-02-03	29.1972	30.192	28.493	1.699		2018-02-03	29.2695	30.243	28.568	1.675		1.687
2018-02-04	Q1	2	6	35	2018-02-04	29.721	34.202	28.345	5.857		2018-02-04	29.7678	34.572	28.345	6.227		6.042		2018-02-04	29.5116	30.95	28.742	2.208		2018-02-04	29.5931	31.077	28.816	2.261		2.2345
2018-02-05	Q1	2	6	36	2018-02-05	29.9071	34.916	28.791	6.125		2018-02-05	29.9655	35.155	28.791	6.364		6.2445		2018-02-05	29.634	30.773	28.667	2.106		2018-02-05	29.7082	30.874	28.742	2.132		2.119
2018-02-06	Q1	2	6	37	2018-02-06	29.662	30.748	28.742	2.006		2018-02-06	29.7059	31.077	28.766	2.311		2.1585		2018-02-06	29.6167	30.268	29.24	1.028		2018-02-06	29.6869	30.318	29.315	1.003		1.0155
2018-02-07	Q1	2	6	38	2018-02-07	30.0666	33.235	28.766	4.469		2018-02-07	30.1257	33.626	28.816	4.81		4.6395		2018-02-07	29.8852	31.281	29.14	2.141		2018-02-07	29.9575	31.331	29.215	2.116		2.1285
2018-02-08	Q1	2	6	39	2018-02-08	30.1956	32.51	29.115	3.395		2018-02-08	30.2529	32.82	29.065	3.755		3.575		2018-02-08	30.0551	31.382	29.615	1.767		2018-02-08	30.1239	31.433	29.665	1.768		1.7675
2018-02-09	Q1	2	6	40	2018-02-09	30.2639	31.179	29.414	1.765		2018-02-09	30.3186	31.586	29.439	2.147		1.956		2018-02-09	30.2807	31.357	29.79	1.567		2018-02-09	30.3456	31.357	29.865	1.492		1.5295
2018-02-10	Q1	2	6	41	2018-02-10	30.507	31.484	30.041	1.443		2018-02-10	30.5573	31.586	30.041	1.545		1.494		2018-02-10	30.38	31.001	30.041	0.96		2018-02-10	30.4483	31.026	30.117	0.909		0.9345
2018-02-11	Q1	2	7	42	2018-02-11	30.7535	31.663	30.142	1.521		2018-02-11	30.7888	31.765	30.142	1.623		1.572		2018-02-11	30.7813	31.637	30.091	1.546		2018-02-11	30.8522	31.612	30.167	1.445		1.4955
2018-02-12	Q1	2	7	43	2018-02-12	30.5247	31.179	29.865	1.314		2018-02-12	30.5426	31.204	29.865	1.339		1.3265		2018-02-12	30.5275	31.306	29.74	1.566		2018-02-12	30.6002	31.382	29.815	1.567		1.5665
2018-02-13	Q1	2	7	44	2018-02-13	30.2597	30.672	29.49	1.182		2018-02-13	30.2794	30.722	29.515	1.207		1.1945		2018-02-13	30.2766	30.672	29.59	1.082		2018-02-13	30.3483	30.722	29.665	1.057		1.0695
2018-02-14	Q1	2	7	45	2018-02-14	30.4409	31.001	29.84	1.161		2018-02-14	30.4591	31.052	29.84	1.212		1.1865		2018-02-14	30.4488	30.925	29.991	0.934		2018-02-14	30.521	30.976	30.066	0.91		0.922
2018-02-15	Q1	2	7	46	2018-02-15	30.1146	30.545	29.115	1.43		2018-02-15	30.1298	30.545	29.14	1.405		1.4175		2018-02-15	30.22	30.52	29.565	0.955		2018-02-15	30.2886	30.571	29.64	0.931		0.943
2018-02-16	Q1	2	7	47	2018-02-16	29.7181	30.243	28.766	1.477		2018-02-16	29.7244	30.243	28.766	1.477		1.477		2018-02-16	29.8281	30.217	29.215	1.002		2018-02-16	29.9004	30.293	29.315	0.978		0.99
2018-02-17	Q1	2	7	48	2018-02-17	29.3609	29.84	28.32	1.52		2018-02-17	29.3656	29.84	28.369	1.471		1.4955		2018-02-17	29.4722	29.84	28.99	0.85		2018-02-17	29.5431	29.916	29.04	0.876		0.863
2018-02-18	Q1	2	8	49	2018-02-18	29.1955	29.464	28.468	0.996		2018-02-18	29.2076	29.49	28.493	0.997		0.9965		2018-02-18	29.2158	29.439	28.717	0.722		2018-02-18	29.2855	29.515	28.791	0.724		0.723
2018-02-19	Q1	2	8	50	2018-02-19	29.3428	30.369	28.642	1.727		2018-02-19	29.3662	30.444	28.667	1.777		1.752		2018-02-19	29.2983	29.765	28.891	0.874		2018-02-19	29.3689	29.84	28.965	0.875		0.8745
2018-02-20	Q1	2	8	51	2018-02-20	29.7068	32.201	29.015	3.186		2018-02-20	29.7478	32.484	29.065	3.419		3.3025		2018-02-20	29.6101	30.621	28.791	1.83		2018-02-20	29.6805	30.672	28.866	1.806		1.818
2018-02-21	Q1	2	8	52	2018-02-21	29.823	31.842	29.09	2.752		2018-02-21	29.8623	31.996	29.09	2.906		2.829		2018-02-21	29.7383	30.571	29.365	1.206		2018-02-21	29.8101	30.621	29.439	1.182		1.194
2018-02-22	Q1	2	8	53	2018-02-22	29.896	31.026	29.265	1.761		2018-02-22	29.9323	31.153	29.265	1.888		1.8245		2018-02-22	29.8304	30.469	29.19	1.279		2018-02-22	29.9019	30.52	29.265	1.255		1.267
2018-02-23	Q1	2	8	54	2018-02-23	30.2443	32.562	29.49	3.072		2018-02-23	30.3012	32.924	29.515	3.409		3.2405		2018-02-23	30.0555	31.153	29.565	1.588		2018-02-23	30.1291	31.23	29.615	1.615		1.6015
2018-02-24	Q1	2	8	55	2018-02-24	30.3086	31.944	28.916	3.028		2018-02-24	30.3637	32.201	28.965	3.236		3.132		2018-02-24	30.272	31.306	29.464	1.842		2018-02-24	30.3419	31.357	29.54	1.817		1.8295
2018-02-25	Q1	2	9	56	2018-02-25	30.4726	31.433	29.665	1.768		2018-02-25	30.5258	31.663	29.665	1.998		1.883		2018-02-25	30.4807	31.484	29.84	1.644		2018-02-25	30.5522	31.535	29.916	1.619		1.6315
2018-02-26	Q1	2	9	57	2018-02-26	30.4717	31.382	29.84	1.542		2018-02-26	30.5097	31.459	29.815	1.644		1.593		2018-02-26	30.4067	31.179	29.815	1.364		2018-02-26	30.4724	31.255	29.865	1.39		1.377
2018-02-27	Q1	2	9	58	2018-02-27	30.3587	30.748	29.49	1.258		2018-02-27	30.3921	30.874	29.515	1.359		1.3085		2018-02-27	30.3839	30.748	29.916	0.832		2018-02-27	30.4529	30.798	29.991	0.807		0.8195
2018-02-28	Q1	2	9	59	2018-02-28	30.1486	30.52	29.19	1.33		2018-02-28	30.1749	30.52	29.215	1.305		1.3175		2018-02-28	30.2308	30.444	29.865	0.579		2018-02-28	30.2993	30.52	29.941	0.579		0.579
2018-03-01	Q1	3	9	60	2018-03-01	30.1421	30.52	29.59	0.93		2018-03-01	30.1702	30.672	29.59	1.082		1.006		2018-03-01	30.1376	30.495	29.515	0.98		2018-03-01	30.2149	30.596	29.615	0.981		0.9805
2018-03-02	Q1	3	9	61	2018-03-02	30.3115	31.052	29.715	1.337		2018-03-02	30.3428	31.204	29.715	1.489		1.413		2018-03-02	30.3135	30.925	29.89	1.035		2018-03-02	30.3932	30.976	29.966	1.01		1.0225
2018-03-03	Q1	3	9	62	2018-03-03	30.4929	32.51	29.464	3.046		2018-03-03	30.5316	32.898	29.464	3.434		3.24		2018-03-03	30.4294	31.255	29.715	1.54		2018-03-03	30.5158	31.382	29.79	1.592		1.566
2018-03-04	Q1	3	10	63	2018-03-04	30.0122	30.495	28.221	2.274		2018-03-04	30.0354	30.52	28.32	2.2		2.237		2018-03-04	30.1881	30.469	29.265	1.204		2018-03-04	30.2559	30.545	29.34	1.205		1.2045
2018-03-05	Q1	3	10	64	2018-03-05	30.5602	33.417	29.64	3.777		2018-03-05	30.617	33.73	29.64	4.09		3.9335		2018-03-05	30.4466	31.331	29.966	1.365		2018-03-05	30.5156	31.408	30.041	1.367		1.366
2018-03-06	Q1	3	10	65	2018-03-06	30.373	31.052	28.766	2.286		2018-03-06	30.4133	31.306	28.742	2.564		2.425		2018-03-06	30.3954	30.849	29.515	1.334		2018-03-06	30.4605	30.874	29.565	1.309		1.3215
2018-03-07	Q1	3	10	66	2018-03-07	30.7692	34.572	29.715	4.857		2018-03-07	30.8296	34.942	29.715	5.227		5.042		2018-03-07	30.5554	31.663	29.464	2.199		2018-03-07	30.6298	31.765	29.515	2.25		2.2245
2018-03-08	Q1	3	10	67	2018-03-08	30.9369	34.176	29.865	4.311		2018-03-08	30.9996	34.598	29.865	4.733		4.522		2018-03-08	30.7489	31.996	30.142	1.854		2018-03-08	30.8176	32.021	30.217	1.804		1.829
2018-03-09	Q1	3	10	68	2018-03-09	30.9113	33.209	29.615	3.594		2018-03-09	30.9784	33.548	29.615	3.933		3.7635		2018-03-09	30.8538	31.996	29.89	2.106		2018-03-09	30.9211	32.021	29.941	2.08		2.093
2018-03-10	Q1	3	10	69	2018-03-10	30.7721	31.868	29.115	2.753		2018-03-10	30.8271	32.073	29.115	2.958		2.8555		2018-03-10	30.8136	31.663	30.041	1.622		2018-03-10	30.878	31.689	30.117	1.572		1.597
2018-03-11	Q1	3	11	70	2018-03-11	30.8201	31.484	30.369	1.115		2018-03-11	30.8667	31.586	30.369	1.217		1.166		2018-03-11	30.7991	31.561	30.192	1.369		2018-03-11	30.8685	31.586	30.268	1.318		1.3435
2018-03-12	Q1	3	11	71	2018-03-12	30.9514	31.791	30.318	1.473		2018-03-12	31.0044	31.919	30.318	1.601		1.537		2018-03-12	30.8842	31.816	30.343	1.473		2018-03-12	30.9562	31.868	30.419	1.449		1.461
2018-03-13	Q1	3	11	72	2018-03-13	30.9715	31.637	30.495	1.142		2018-03-13	31.0152	31.689	30.495	1.194		1.168		2018-03-13	30.9306	31.331	30.444	0.887		2018-03-13	31.0024	31.408	30.52	0.888		0.8875
2018-03-14	Q1	3	11	73	2018-03-14	31.0148	31.637	30.217	1.42		2018-03-14	31.0546	31.612	30.217	1.395		1.4075		2018-03-14	30.9924	31.484	30.318	1.166		2018-03-14	31.0688	31.561	30.394	1.167		1.1665
2018-03-15	Q1	3	11	74	2018-03-15	31.06	31.74	30.117	1.623		2018-03-15	31.0989	31.791	30.117	1.674		1.6485		2018-03-15	31.1005	31.791	30.343	1.448		2018-03-15	31.1753	31.868	30.419	1.449		1.4485
2018-03-16	Q1	3	11	75	2018-03-16	31.2011	31.689	30.773	0.916		2018-03-16	31.2281	31.765	30.748	1.017		0.9665		2018-03-16	31.2197	31.868	30.925	0.943		2018-03-16	31.2981	31.944	31.001	0.943		0.943
2018-03-17	Q1	3	11	76	2018-03-17	31.2013	31.714	30.646	1.068		2018-03-17	31.2362	31.791	30.646	1.145		1.1065		2018-03-17	31.2464	31.689	30.9	0.789		2018-03-17	31.3255	31.791	30.95	0.841		0.815
2018-03-18	Q1	3	12	77	2018-03-18	31.0639	31.408	30.419	0.989		2018-03-18	31.1002	31.459	30.419	1.04		1.0145		2018-03-18	31.1361	31.459	30.824	0.635		2018-03-18	31.2085	31.535	30.9	0.635		0.635
2018-03-19	Q1	3	12	78	2018-03-19	30.2482	31.255	28.369	2.886		2018-03-19	30.2529	31.255	28.394	2.861		2.8735		2018-03-19	30.4651	31.23	29.414	1.816		2018-03-19	30.5373	31.331	29.49	1.841		1.8285
2018-03-20	Q1	3	12	79	2018-03-20	30.1974	30.419	29.265	1.154		2018-03-20	30.2121	30.444	29.24	1.204		1.179		2018-03-20	30.2108	30.369	29.439	0.93		2018-03-20	30.2806	30.444	29.515	0.929		0.9295
2018-03-21	Q1	3	12	80	2018-03-21	30.5138	33.053	29.565	3.488		2018-03-21	30.5539	33.287	29.565	3.722		3.605		2018-03-21	30.4162	31.026	29.89	1.136		2018-03-21	30.4948	31.153	29.966	1.187		1.1615
2018-03-22	Q1	3	12	81	2018-03-22	30.8032	34.308	30.016	4.292		2018-03-22	30.8527	34.677	30.016	4.661		4.4765		2018-03-22	30.6449	31.637	29.815	1.822		2018-03-22	30.725	31.74	29.89	1.85		1.836
2018-03-23	Q1	3	12	82	2018-03-23	31.0364	34.019	30.217	3.802		2018-03-23	31.0916	34.281	30.192	4.089		3.9455		2018-03-23	30.8858	31.893	30.192	1.701		2018-03-23	30.9605	31.944	30.268	1.676		1.6885
2018-03-24	Q1	3	12	83	2018-03-24	31.1464	33.105	30.268	2.837		2018-03-24	31.2042	33.495	30.268	3.227		3.032		2018-03-24	31.0074	32.021	30.343	1.678		2018-03-24	31.0892	32.124	30.419	1.705		1.6915
2018-03-25	Q1	3	13	84	2018-03-25	31.2607	32.768	30.469	2.299		2018-03-25	31.3289	33.079	30.495	2.584		2.4415		2018-03-25	31.2065	32.227	30.646	1.581		2018-03-25	31.2886	32.304	30.722	1.582		1.5815
2018-03-26	Q1	3	13	85	2018-03-26	31.2769	32.227	30.444	1.783		2018-03-26	31.3366	32.381	30.469	1.912		1.8475		2018-03-26	31.1777	32.15	30.646	1.504		2018-03-26	31.2605	32.175	30.722	1.453		1.4785
2018-03-27	Q1	3	13	86	2018-03-27	31.3496	32.201	30.773	1.428		2018-03-27	31.388	32.33	30.798	1.532		1.48		2018-03-27	31.3347	32.047	30.697	1.35		2018-03-27	31.4122	32.098	30.773	1.325		1.3375
2018-03-28	Q1	3	13	87	2018-03-28	31.3455	32.175	30.571	1.604		2018-03-28	31.3771	32.201	30.571	1.63		1.617		2018-03-28	31.317	31.765	30.798	0.967		2018-03-28	31.3965	31.842	30.874	0.968		0.9675
2018-03-29	Q1	3	13	88	2018-03-29	31.1606	31.535	30.444	1.091		2018-03-29	31.1902	31.561	30.469	1.092		1.0915		2018-03-29	31.1694	31.408	30.672	0.736		2018-03-29	31.2507	31.484	30.748	0.736		0.736
2018-03-30	Q1	3	13	89	2018-03-30	31.0122	31.459	29.765	1.694		2018-03-30	31.0373	31.484	29.715	1.769		1.7315		2018-03-30	31.089	31.433	30.722	0.711		2018-03-30	31.1724	31.51	30.798	0.712		0.7115
2018-03-31	Q1	3	13	90	2018-03-31	31.0422	31.484	29.815	1.669		2018-03-31	31.0731	31.637	29.865	1.772		1.7205		2018-03-31	31.0665	31.433	30.293	1.14		2018-03-31	31.1494	31.561	30.369	1.192		1.166
2018-04-01	Q2	4	14	91	2018-04-01	30.9012	31.357	29.54	1.817		2018-04-01	30.9354	31.586	29.59	1.996		1.9065		2018-04-01	30.9389	31.306	30.167	1.139		2018-04-01	31.0154	31.408	30.243	1.165		1.152
2018-04-02	Q2	4	14	92	2018-04-02	31.0816	32.82	30.469	2.351		2018-04-02	31.1188	33.079	30.444	2.635		2.493		2018-04-02	31.0282	31.535	30.621	0.914		2018-04-02	31.1094	31.663	30.697	0.966		0.94
2018-04-03	Q2	4	14	93	2018-04-03	31.2768	33.757	30.52	3.237		2018-04-03	31.3192	34.071	30.495	3.576		3.4065		2018-04-03	31.1602	31.944	30.722	1.222		2018-04-03	31.2455	32.047	30.798	1.249		1.2355
2018-04-04	Q2	4	14	94	2018-04-04	31.348	33.914	30.066	3.848		2018-04-04	31.3849	34.281	30.066	4.215		4.0315		2018-04-04	31.2761	32.047	30.571	1.476		2018-04-04	31.3603	32.15	30.646	1.504		1.49
2018-04-05	Q2	4	14	95	2018-04-05	31.321	33.079	30.142	2.937		2018-04-05	31.3488	33.365	30.142	3.223		3.08		2018-04-05	31.2536	31.944	30.596	1.348		2018-04-05	31.3321	32.021	30.672	1.349		1.3485
2018-04-06	Q2	4	14	96	2018-04-06	31.2973	32.82	30.293	2.527		2018-04-06	31.3232	33.001	30.293	2.708		2.6175		2018-04-06	31.213	32.047	30.469	1.578		2018-04-06	31.3013	32.15	30.571	1.579		1.5785
2018-04-07	Q2	4	14	97	2018-04-07	31.2208	32.407	29.966	2.441		2018-04-07	31.2534	32.639	29.966	2.673		2.557		2018-04-07	31.215	32.098	30.419	1.679		2018-04-07	31.29	32.175	30.495	1.68		1.6795
2018-04-08	Q2	4	15	98	2018-04-08	31.0671	31.791	29.815	1.976		2018-04-08	31.1051	32.047	29.89	2.157		2.0665		2018-04-08	31.0729	31.74	30.394	1.346		2018-04-08	31.1451	31.791	30.469	1.322		1.334
2018-04-09	Q2	4	15	99	2018-04-09	31.1146	31.868	29.991	1.877		2018-04-09	31.1441	31.944	30.016	1.928		1.9025		2018-04-09	31.0502	31.944	30.243	1.701		2018-04-09	31.13	32.021	30.318	1.703		1.702
2018-04-10	Q2	4	15	100	2018-04-10	31.3319	32.175	30.798	1.377		2018-04-10	31.3582	32.201	30.798	1.403		1.39		2018-04-10	31.2117	32.15	30.571	1.579		2018-04-10	31.2888	32.227	30.646	1.581		1.58
2018-04-11	Q2	4	15	101	2018-04-11	31.5601	32.407	31.001	1.406		2018-04-11	31.5905	32.484	31.026	1.458		1.432		2018-04-11	31.5222	32.458	30.925	1.533		2018-04-11	31.6059	32.51	31.001	1.509		1.521
2018-04-12	Q2	4	15	102	2018-04-12	31.59	31.97	31.23	0.74		2018-04-12	31.6156	31.996	31.255	0.741		0.7405		2018-04-12	31.5765	32.073	31.103	0.97		2018-04-12	31.6552	32.15	31.179	0.971		0.9705
2018-04-13	Q2	4	15	103	2018-04-13	31.4807	31.842	30.646	1.196		2018-04-13	31.5068	31.842	30.722	1.12		1.158		2018-04-13	31.4899	31.714	31.128	0.586		2018-04-13	31.5709	31.791	31.23	0.561		0.5735
2018-04-14	Q2	4	15	104	2018-04-14	31.4393	31.765	30.798	0.967		2018-04-14	31.4584	31.791	30.798	0.993		0.98		2018-04-14	31.4509	31.765	31.052	0.713		2018-04-14	31.5324	31.842	31.153	0.689		0.701
2018-04-15	Q2	4	16	105	2018-04-15	31.3911	31.791	30.621	1.17		2018-04-15	31.4078	31.816	30.621	1.195		1.1825		2018-04-15	31.4684	31.842	30.9	0.942		2018-04-15	31.546	31.893	30.976	0.917		0.9295
2018-04-16	Q2	4	16	106	2018-04-16	30.9652	31.51	29.015	2.495		2018-04-16	30.9744	31.51	29.015	2.495		2.495		2018-04-16	31.0557	31.484	30.091	1.393		2018-04-16	31.1292	31.535	30.167	1.368		1.3805
2018-04-17	Q2	4	16	107	2018-04-17	31.1276	32.047	29.865	2.182		2018-04-17	31.1481	32.304	29.89	2.414		2.298		2018-04-17	31.1188	31.612	30.268	1.344		2018-04-17	31.2052	31.765	30.343	1.422		1.383
2018-04-18	Q2	4	16	108	2018-04-18	31.2031	32.665	29.966	2.699		2018-04-18	31.2289	32.975	29.941	3.034		2.8665		2018-04-18	31.1716	31.791	30.268	1.523		2018-04-18	31.2568	31.919	30.343	1.576		1.5495
2018-04-19	Q2	4	16	109	2018-04-19	31.2706	33.495	29.815	3.68		2018-04-19	31.2974	33.678	29.765	3.913		3.7965		2018-04-19	31.2283	31.944	30.243	1.701		2018-04-19	31.3171	32.073	30.318	1.755		1.728
2018-04-20	Q2	4	16	110	2018-04-20	31.2681	33.209	29.765	3.444		2018-04-20	31.3053	33.678	29.815	3.863		3.6535		2018-04-20	31.2292	31.919	30.369	1.55		2018-04-20	31.319	32.021	30.444	1.577		1.5635
2018-04-21	Q2	4	16	111	2018-04-21	31.3411	33.157	30.117	3.04		2018-04-21	31.3765	33.417	30.091	3.326		3.183		2018-04-21	31.3015	32.175	30.469	1.706		2018-04-21	31.3887	32.278	30.545	1.733		1.7195
2018-04-22	Q2	4	17	112	2018-04-22	31.398	32.872	29.865	3.007		2018-04-22	31.4401	33.157	29.865	3.292		3.1495		2018-04-22	31.3232	32.253	30.394	1.859		2018-04-22	31.414	32.381	30.469	1.912		1.8855
2018-04-23	Q2	4	17	113	2018-04-23	31.4968	32.639	30.469	2.17		2018-04-23	31.53	32.82	30.469	2.351		2.2605		2018-04-23	31.4318	32.253	30.849	1.404		2018-04-23	31.5186	32.33	30.925	1.405		1.4045
2018-04-24	Q2	4	17	114	2018-04-24	31.5915	32.227	30.672	1.555		2018-04-24	31.6308	32.407	30.722	1.685		1.62		2018-04-24	31.5936	32.381	31.103	1.278		2018-04-24	31.6812	32.484	31.179	1.305		1.2915
2018-04-25	Q2	4	17	115	2018-04-25	31.5126	32.098	30.925	1.173		2018-04-25	31.5422	32.15	30.925	1.225		1.199		2018-04-25	31.5119	32.175	30.95	1.225		2018-04-25	31.5949	32.253	31.026	1.227		1.226
2018-04-26	Q2	4	17	116	2018-04-26	31.4074	31.996	30.874	1.122		2018-04-26	31.4305	32.047	30.874	1.173		1.1475		2018-04-26	31.375	31.765	30.9	0.865		2018-04-26	31.4531	31.842	30.976	0.866		0.8655
2018-04-27	Q2	4	17	117	2018-04-27	31.1862	31.74	29.966	1.774		2018-04-27	31.2026	31.765	29.991	1.774		1.774		2018-04-27	31.2079	31.535	30.672	0.863		2018-04-27	31.2868	31.612	30.748	0.864		0.8635
2018-04-28	Q2	4	17	118	2018-04-28	30.9769	31.433	29.715	1.718		2018-04-28	30.9921	31.459	29.69	1.769		1.7435		2018-04-28	31.0408	31.433	30.091	1.342		2018-04-28	31.1212	31.484	30.167	1.317		1.3295
2018-04-29	Q2	4	18	119	2018-04-29	30.5868	31.153	28.27	2.883		2018-04-29	30.5995	31.179	28.369	2.81		2.8465		2018-04-29	30.742	31.128	29.765	1.363		2018-04-29	30.821	31.179	29.84	1.339		1.351
2018-04-30	Q2	4	18	120	2018-04-30	30.1673	30.95	27.899	3.051		2018-04-30	30.1752	30.976	27.998	2.978		3.0145		2018-04-30	30.3678	30.925	29.365	1.56		2018-04-30	30.4454	31.001	29.464	1.537		1.5485
2018-05-01	Q2	5	18	121	2018-05-01	30.0908	30.672	28.196	2.476		2018-05-01	30.1133	30.748	28.245	2.503		2.4895		2018-05-01	30.2432	30.646	29.04	1.606		2018-05-01	30.3236	30.722	29.115	1.607		1.6065
2018-05-02	Q2	5	18	122	2018-05-02	29.8476	30.444	27.751	2.693		2018-05-02	29.8696	30.495	27.776	2.719		2.706		2018-05-02	29.9901	30.394	28.617	1.777		2018-05-02	30.0702	30.469	28.692	1.777		1.777
2018-05-03	Q2	5	18	123	2018-05-03	29.8066	30.268	28.072	2.196		2018-05-03	29.8317	30.495	28.023	2.472		2.334		2018-05-03	29.8628	30.217	28.791	1.426		2018-05-03	29.9448	30.293	28.866	1.427		1.4265
2018-05-04	Q2	5	18	124	2018-05-04	29.6231	30.066	27.579	2.487		2018-05-04	29.6526	30.192	27.628	2.564		2.5255		2018-05-04	29.7275	30.091	28.667	1.424		2018-05-04	29.8066	30.192	28.742	1.45		1.437
2018-05-05	Q2	5	18	125	2018-05-05	29.5449	29.815	28.816	0.999		2018-05-05	29.5668	29.865	28.593	1.272		1.1355		2018-05-05	29.5614	29.84	28.791	1.049		2018-05-05	29.64	29.916	28.866	1.05		1.0495
2018-05-06	Q2	5	19	126	2018-05-06	29.7347	30.469	29.165	1.304		2018-05-06	29.7599	30.646	29.165	1.481		1.3925		2018-05-06	29.7042	30.243	29.265	0.978		2018-05-06	29.7839	30.318	29.34	0.978		0.978
2018-05-07	Q2	5	19	127	2018-05-07	29.789	30.52	28.866	1.654		2018-05-07	29.8174	30.672	28.916	1.756		1.705		2018-05-07	29.7662	30.343	29.19	1.153		2018-05-07	29.8453	30.419	29.265	1.154		1.1535
2018-05-08	Q2	5	19	128	2018-05-08	29.6921	30.243	28.543	1.7		2018-05-08	29.7159	30.394	28.543	1.851		1.7755		2018-05-08	29.6913	30.243	28.965	1.278		2018-05-08	29.7701	30.318	29.04	1.278		1.278
2018-05-09	Q2	5	19	129	2018-05-09	29.7239	30.217	29.24	0.977		2018-05-09	29.7496	30.343	29.215	1.128		1.0525		2018-05-09	29.6653	30.268	29.015	1.253		2018-05-09	29.7383	30.318	29.09	1.228		1.2405
2018-05-10	Q2	5	19	130	2018-05-10	29.6556	30.167	29.115	1.052		2018-05-10	29.6731	30.217	29.115	1.102		1.077		2018-05-10	29.5463	30.016	28.841	1.175		2018-05-10	29.6204	30.091	28.916	1.175		1.175
2018-05-11	Q2	5	19	131	2018-05-11	29.2739	29.64	28.866	0.774		2018-05-11	29.2866	29.665	28.866	0.799		0.7865		2018-05-11	29.2116	29.64	28.593	1.047		2018-05-11	29.2883	29.715	28.667	1.048		1.0475
2018-05-12	Q2	5	19	132	2018-05-12	28.3453	29.265	27.112	2.153		2018-05-12	28.3561	29.265	27.136	2.129		2.141		2018-05-12	28.3212	29.265	27.259	2.006		2018-05-12	28.3925	29.315	27.333	1.982		1.994
2018-05-13	Q2	5	20	133	2018-05-13	26.8987	28.394	24.122	4.272		2018-05-13	26.9105	28.394	24.146	4.248		4.26		2018-05-13	27.0338	28.369	25.72	2.649		2018-05-13	27.1054	28.444	25.768	2.676		2.6625
2018-05-14	Q2	5	20	134	2018-05-14	26.2111	27.554	23.112	4.442		2018-05-14	26.2145	27.579	23.112	4.467		4.4545		2018-05-14	26.5633	27.554	25.21	2.344		2018-05-14	26.6315	27.628	25.283	2.345		2.3445
2018-05-15	Q2	5	20	135	2018-05-15	25.8911	27.235	21.748	5.487		2018-05-15	25.8962	27.235	21.748	5.487		5.487		2018-05-15	26.2016	27.186	24.532	2.654		2018-05-15	26.2689	27.259	24.557	2.702		2.678
2018-05-16	Q2	5	20	136	2018-05-16	25.2798	26.867	20.65	6.217		2018-05-16	25.2875	26.867	20.627	6.24		6.2285		2018-05-16	25.703	26.842	24.243	2.599		2018-05-16	25.7744	26.916	24.315	2.601		2.6
2018-05-17	Q2	5	20	137	2018-05-17	24.9167	26.378	21.008	5.37		2018-05-17	24.9289	26.378	20.984	5.394		5.382		2018-05-17	25.2281	26.353	23.978	2.375		2018-05-17	25.2963	26.426	24.05	2.376		2.3755
2018-05-18	Q2	5	20	138	2018-05-18	24.8868	26.061	21.318	4.743		2018-05-18	24.9002	26.061	21.223	4.838		4.7905		2018-05-18	25.1053	26.061	24.122	1.939		2018-05-18	25.1747	26.109	24.195	1.914		1.9265
2018-05-19	Q2	5	20	139	2018-05-19	25.1708	26.256	21.533	4.723		2018-05-19	25.1989	26.304	21.485	4.819		4.771		2018-05-19	25.3478	25.768	23.93	1.838		2018-05-19	25.4224	25.841	24.002	1.839		1.8385
2018-05-20	Q2	5	21	140	2018-05-20	25.2484	25.963	22.992	2.971		2018-05-20	25.2942	26.012	22.944	3.068		3.0195		2018-05-20	25.3844	25.914	24.243	1.671		2018-05-20	25.4559	25.963	24.315	1.648		1.6595
2018-05-21	Q2	5	21	141	2018-05-21	25.5371	26.378	23.737	2.641		2018-05-21	25.5866	26.671	23.737	2.934		2.7875		2018-05-21	25.5564	26.158	24.46	1.698		2018-05-21	25.6325	26.207	24.532	1.675		1.6865
2018-05-22	Q2	5	21	142	2018-05-22	25.6977	26.182	24.074	2.108		2018-05-22	25.7306	26.353	24.074	2.279		2.1935		2018-05-22	25.7039	26.012	24.508	1.504		2018-05-22	25.7769	26.085	24.581	1.504		1.504
2018-05-23	Q2	5	21	143	2018-05-23	25.6328	26.475	23.689	2.786		2018-05-23	25.6773	26.646	23.689	2.957		2.8715		2018-05-23	25.5991	26.207	24.412	1.795		2018-05-23	25.6755	26.304	24.508	1.796		1.7955
2018-05-24	Q2	5	21	144	2018-05-24	26.0579	26.891	25.307	1.584		2018-05-24	26.1027	27.087	25.307	1.78		1.682		2018-05-24	25.9969	26.622	25.137	1.485		2018-05-24	26.0699	26.695	25.21	1.485		1.485
2018-05-25	Q2	5	21	145	2018-05-25	26.4653	27.259	25.963	1.296		2018-05-25	26.5029	27.431	25.963	1.468		1.382		2018-05-25	26.3718	26.891	25.866	1.025		2018-05-25	26.4506	26.94	25.939	1.001		1.013
2018-05-26	Q2	5	21	146	2018-05-26	26.6253	27.259	25.866	1.393		2018-05-26	26.6477	27.333	25.866	1.467		1.43		2018-05-26	26.5887	26.965	26.109	0.856		2018-05-26	26.6659	27.038	26.182	0.856		0.856
2018-05-27	Q2	5	22	147	2018-05-27	26.6034	26.989	25.453	1.536		2018-05-27	26.6223	27.038	25.477	1.561		1.5485		2018-05-27	26.6117	26.891	26.036	0.855		2018-05-27	26.6904	26.965	26.109	0.856		0.8555
2018-05-28	Q2	5	22	148	2018-05-28	26.39	26.867	24.992	1.875		2018-05-28	26.4117	26.891	25.04	1.851		1.863		2018-05-28	26.523	26.842	25.695	1.147		2018-05-28	26.5975	26.916	25.768	1.148		1.1475
2018-05-29	Q2	5	22	149	2018-05-29	26.1425	26.598	24.05	2.548		2018-05-29	26.161	26.622	24.074	2.548		2.548		2018-05-29	26.2578	26.598	25.598	1		2018-05-29	26.3348	26.671	25.695	0.976		0.988
2018-05-30	Q2	5	22	150	2018-05-30	26.3162	26.72	25.307	1.413		2018-05-30	26.3383	26.818	25.331	1.487		1.45		2018-05-30	26.3485	26.622	25.963	0.659		2018-05-30	26.4289	26.72	26.061	0.659		0.659
2018-05-31	Q2	5	22	151	2018-05-31	26.5372	27.038	24.992	2.046		2018-05-31	26.5667	27.112	25.065	2.047		2.0465		2018-05-31	26.561	26.94	25.939	1.001		2018-05-31	26.6403	27.038	26.012	1.026		1.0135
2018-06-01	Q2	6	22	152	2018-06-01	26.56	26.989	25.428	1.561		2018-06-01	26.5878	27.087	25.38	1.707		1.634		2018-06-01	26.5844	26.916	25.963	0.953		2018-06-01	26.6661	26.989	26.061	0.928		0.9405
2018-06-02	Q2	6	22	153	2018-06-02	26.2496	26.842	23.136	3.706		2018-06-02	26.2751	26.94	23.064	3.876		3.791		2018-06-02	26.4766	26.744	25.089	1.655		2018-06-02	26.5545	26.818	25.162	1.656		1.6555
2018-06-03	Q2	6	23	154	2018-06-03	26.1386	26.671	24.219	2.452		2018-06-03	26.1694	26.744	24.219	2.525		2.4885		2018-06-03	26.2182	26.549	25.186	1.363		2018-06-03	26.2969	26.646	25.234	1.412		1.3875
2018-06-04	Q2	6	23	155	2018-06-04	26.1787	26.818	24.702	2.116		2018-06-04	26.2176	27.063	24.677	2.386		2.251		2018-06-04	26.1593	26.646	25.283	1.363		2018-06-04	26.2376	26.744	25.355	1.389		1.376
2018-06-05	Q2	6	23	156	2018-06-05	26.2515	27.136	25.137	1.999		2018-06-05	26.2944	27.407	25.137	2.27		2.1345		2018-06-05	26.2282	26.965	25.525	1.44		2018-06-05	26.3073	27.063	25.574	1.489		1.4645
2018-06-06	Q2	6	23	157	2018-06-06	26.3126	26.94	25.21	1.73		2018-06-06	26.3503	27.161	25.186	1.975		1.8525		2018-06-06	26.3075	26.916	25.623	1.293		2018-06-06	26.3855	27.014	25.695	1.319		1.306
2018-06-07	Q2	6	23	158	2018-06-07	26.4034	27.038	25.574	1.464		2018-06-07	26.445	27.259	25.55	1.709		1.5865		2018-06-07	26.4051	27.161	25.671	1.49		2018-06-07	26.4843	27.235	25.744	1.491		1.4905
2018-06-08	Q2	6	23	159	2018-06-08	26.5297	27.235	26.085	1.15		2018-06-08	26.5672	27.431	26.061	1.37		1.26		2018-06-08	26.4372	27.063	25.939	1.124		2018-06-08	26.5145	27.136	26.012	1.124		1.124
2018-06-09	Q2	6	23	160	2018-06-09	26.6904	27.481	26.158	1.323		2018-06-09	26.7193	27.604	26.085	1.519		1.421		2018-06-09	26.6014	27.038	25.89	1.148		2018-06-09	26.6783	27.112	25.939	1.173		1.1605
2018-06-10	Q2	6	24	161	2018-06-10	26.6921	27.382	26.061	1.321		2018-06-10	26.7143	27.431	26.061	1.37		1.3455		2018-06-10	26.628	26.94	25.866	1.074		2018-06-10	26.7004	27.014	25.963	1.051		1.0625
2018-06-11	Q2	6	24	162	2018-06-11	26.6282	27.161	25.428	1.733		2018-06-11	26.6423	27.21	25.428	1.782		1.7575		2018-06-11	26.6356	26.94	25.939	1.001		2018-06-11	26.709	27.038	26.012	1.026		1.0135
2018-06-12	Q2	6	24	163	2018-06-12	26.5111	26.94	25.404	1.536		2018-06-12	26.5251	26.94	25.428	1.512		1.524		2018-06-12	26.5717	26.842	25.914	0.928		2018-06-12	26.6445	26.916	25.987	0.929		0.9285
2018-06-13	Q2	6	24	164	2018-06-13	25.9088	26.769	22.441	4.328		2018-06-13	25.9142	26.769	22.369	4.4		4.364		2018-06-13	26.2264	26.744	24.774	1.97		2018-06-13	26.2971	26.818	24.847	1.971		1.9705
2018-06-14	Q2	6	24	165	2018-06-14	25.0654	26.256	21.581	4.675		2018-06-14	25.0645	26.256	21.557	4.699		4.687		2018-06-14	25.4507	26.207	24.243	1.964		2018-06-14	25.5208	26.28	24.315	1.965		1.9645
2018-06-15	Q2	6	24	166	2018-06-15	25.1398	25.817	22.824	2.993		2018-06-15	25.1535	25.866	22.92	2.946		2.9695		2018-06-15	25.2557	25.768	24.702	1.066		2018-06-15	25.3266	25.817	24.75	1.067		1.0665
2018-06-16	Q2	6	24	167	2018-06-16	25.435	26.036	24.629	1.407		2018-06-16	25.4616	26.109	24.557	1.552		1.4795		2018-06-16	25.4483	25.866	25.065	0.801		2018-06-16	25.5227	25.939	25.137	0.802		0.8015
2018-06-17	Q2	6	25	168	2018-06-17	25.5396	26.109	22.8	3.309		2018-06-17	25.567	26.256	22.8	3.456		3.3825		2018-06-17	25.6837	26.061	25.113	0.948		2018-06-17	25.7576	26.134	25.186	0.948		0.948
2018-06-18	Q2	6	25	169	2018-06-18	25.5026	26.012	23.881	2.131		2018-06-18	25.5409	26.256	23.93	2.326		2.2285		2018-06-18	25.5521	26.036	24.726	1.31		2018-06-18	25.626	26.109	24.798	1.311		1.3105
2018-06-19	Q2	6	25	170	2018-06-19	25.6087	26.5	24.629	1.871		2018-06-19	25.6519	26.793	24.653	2.14		2.0055		2018-06-19	25.5547	26.061	24.75	1.311		2018-06-19	25.6286	26.134	24.798	1.336		1.3235
2018-06-20	Q2	6	25	171	2018-06-20	25.3522	25.744	23.881	1.863		2018-06-20	25.3851	25.866	23.881	1.985		1.924		2018-06-20	25.3832	25.671	24.605	1.066		2018-06-20	25.454	25.744	24.702	1.042		1.054
2018-06-21	Q2	6	25	172	2018-06-21	25.0008	25.647	23.352	2.295		2018-06-21	25.0366	25.817	23.352	2.465		2.38		2018-06-21	24.9865	25.428	23.905	1.523		2018-06-21	25.0574	25.477	23.978	1.499		1.511
2018-06-22	Q2	6	25	173	2018-06-22	24.8762	25.38	24.074	1.306		2018-06-22	24.9048	25.501	24.098	1.403		1.3545		2018-06-22	24.8412	25.234	23.905	1.329		2018-06-22	24.9094	25.283	23.978	1.305		1.317
2018-06-23	Q2	6	25	174	2018-06-23	24.2553	24.823	22.944	1.879		2018-06-23	24.2795	24.895	22.944	1.951		1.915		2018-06-23	24.1441	24.75	22.92	1.83		2018-06-23	24.2084	24.823	22.992	1.831		1.8305
2018-06-24	Q2	6	26	175	2018-06-24	23.8487	24.46	22.537	1.923		2018-06-24	23.8678	24.484	22.537	1.947		1.935		2018-06-24	23.7269	24.412	22.681	1.731		2018-06-24	23.7928	24.484	22.729	1.755		1.743
2018-06-25	Q2	6	26	176	2018-06-25	23.448	24.171	21.795	2.376		2018-06-25	23.4655	24.195	21.795	2.4		2.388		2018-06-25	23.4409	24.146	22.226	1.92		2018-06-25	23.5065	24.219	22.298	1.921		1.9205
2018-06-26	Q2	6	26	177	2018-06-26	23.2054	23.881	21.342	2.539		2018-06-26	23.2169	23.93	21.199	2.731		2.635		2018-06-26	23.3268	23.857	22.202	1.655		2018-06-26	23.3939	23.93	22.298	1.632		1.6435
2018-06-27	Q2	6	26	178	2018-06-27	23.4334	23.93	22.13	1.8		2018-06-27	23.4481	23.954	22.178	1.776		1.788		2018-06-27	23.5392	23.905	22.776	1.129		2018-06-27	23.6103	23.978	22.872	1.106		1.1175
2018-06-28	Q2	6	26	179	2018-06-28	23.7968	24.243	22.681	1.562		2018-06-28	23.8194	24.315	22.681	1.634		1.598		2018-06-28	23.8531	24.098	23.424	0.674		2018-06-28	23.9264	24.171	23.497	0.674		0.674
2018-06-29	Q2	6	26	180	2018-06-29	23.8898	24.363	22.705	1.658		2018-06-29	23.9129	24.436	22.657	1.779		1.7185		2018-06-29	24.0029	24.243	23.472	0.771		2018-06-29	24.074	24.315	23.545	0.77		0.7705
2018-06-30	Q2	6	26	181	2018-06-30	23.8011	24.315	22.369	1.946		2018-06-30	23.8266	24.315	22.513	1.802		1.874		2018-06-30	23.9257	24.291	23.352	0.939		2018-06-30	23.9967	24.363	23.424	0.939		0.939
2018-07-01	Q3	7	27	182	2018-07-01	24.0228	24.508	23.304	1.204		2018-07-01	24.0539	24.581	23.304	1.277		1.2405		2018-07-01	24.0558	24.339	23.737	0.602		2018-07-01	24.1308	24.412	23.785	0.627		0.6145
2018-07-02	Q3	7	27	183	2018-07-02	24.3518	25.307	23.448	1.859		2018-07-02	24.3954	25.525	23.472	2.053		1.956		2018-07-02	24.3177	24.895	23.713	1.182		2018-07-02	24.3905	24.944	23.785	1.159		1.1705
2018-07-03	Q3	7	27	184	2018-07-03	24.5537	25.38	23.665	1.715		2018-07-03	24.5934	25.55	23.641	1.909		1.812		2018-07-03	24.5439	25.065	23.881	1.184		2018-07-03	24.6146	25.137	23.954	1.183		1.1835
2018-07-04	Q3	7	27	185	2018-07-04	24.6399	25.428	23.833	1.595		2018-07-04	24.6866	25.647	23.833	1.814		1.7045		2018-07-04	24.6285	25.186	23.978	1.208		2018-07-04	24.6985	25.258	24.05	1.208		1.208
2018-07-05	Q3	7	27	186	2018-07-05	24.7093	25.72	23.785	1.935		2018-07-05	24.7588	26.012	23.857	2.155		2.045		2018-07-05	24.6578	25.21	23.905	1.305		2018-07-05	24.725	25.283	23.978	1.305		1.305
2018-07-06	Q3	7	27	187	2018-07-06	24.414	24.992	23.304	1.688		2018-07-06	24.445	25.162	23.328	1.834		1.761		2018-07-06	24.4352	24.823	23.833	0.99		2018-07-06	24.5041	24.895	23.905	0.99		0.99
2018-07-07	Q3	7	27	188	2018-07-07	24.0784	24.895	22.441	2.454		2018-07-07	24.1161	25.04	22.441	2.599		2.5265		2018-07-07	24.0619	24.605	22.968	1.637		2018-07-07	24.1253	24.653	23.04	1.613		1.625
2018-07-08	Q3	7	28	189	2018-07-08	24.1616	25.04	23.376	1.664		2018-07-08	24.2052	25.21	23.376	1.834		1.749		2018-07-08	24.0781	24.629	23.256	1.373		2018-07-08	24.1414	24.653	23.352	1.301		1.337
2018-07-09	Q3	7	28	190	2018-07-09	24.1024	24.992	23.352	1.64		2018-07-09	24.1407	25.186	23.352	1.834		1.737		2018-07-09	23.9719	24.412	23.112	1.3		2018-07-09	24.0373	24.46	23.208	1.252		1.276
2018-07-10	Q3	7	28	191	2018-07-10	24.0614	25.016	23.352	1.664		2018-07-10	24.0905	25.089	23.376	1.713		1.6885		2018-07-10	23.9172	24.315	23.064	1.251		2018-07-10	23.9847	24.388	23.16	1.228		1.2395
2018-07-11	Q3	7	28	192	2018-07-11	24.0518	24.629	23.04	1.589		2018-07-11	24.0731	24.702	23.064	1.638		1.6135		2018-07-11	24.0423	24.436	23.304	1.132		2018-07-11	24.1104	24.508	23.352	1.156		1.144
2018-07-12	Q3	7	28	193	2018-07-12	23.7923	24.388	22.393	1.995		2018-07-12	23.8084	24.388	22.417	1.971		1.983		2018-07-12	23.8534	24.363	23.16	1.203		2018-07-12	23.9205	24.436	23.256	1.18		1.1915
2018-07-13	Q3	7	28	194	2018-07-13	23.4154	24.171	21.7	2.471		2018-07-13	23.4322	24.195	21.628	2.567		2.519		2018-07-13	23.5367	24.146	22.537	1.609		2018-07-13	23.6053	24.219	22.609	1.61		1.6095
2018-07-14	Q3	7	28	195	2018-07-14	23.419	23.978	21.772	2.206		2018-07-14	23.44	23.978	21.891	2.087		2.1465		2018-07-14	23.5272	23.954	22.753	1.201		2018-07-14	23.5938	24.026	22.824	1.202		1.2015
2018-07-15	Q3	7	29	196	2018-07-15	23.3267	23.833	21.843	1.99		2018-07-15	23.354	23.881	21.915	1.966		1.978		2018-07-15	23.4833	23.761	22.417	1.344		2018-07-15	23.5516	23.833	22.489	1.344		1.344
2018-07-16	Q3	7	29	197	2018-07-16	23.5134	24.002	21.963	2.039		2018-07-16	23.562	24.195	22.034	2.161		2.1		2018-07-16	23.5463	23.905	22.537	1.368		2018-07-16	23.6161	23.954	22.609	1.345		1.3565
2018-07-17	Q3	7	29	198	2018-07-17	23.7139	25.089	22.417	2.672		2018-07-17	23.7747	25.501	22.417	3.084		2.878		2018-07-17	23.654	24.146	22.537	1.609		2018-07-17	23.7234	24.219	22.633	1.586		1.5975
2018-07-18	Q3	7	29	199	2018-07-18	24.051	27.087	22.441	4.646		2018-07-18	24.1147	27.505	22.489	5.016		4.831		2018-07-18	23.8856	24.702	23.064	1.638		2018-07-18	23.9564	24.774	23.136	1.638		1.638
2018-07-19	Q3	7	29	200	2018-07-19	24.1731	26.426	22.489	3.937		2018-07-19	24.2226	26.744	22.369	4.375		4.156		2018-07-19	24.0187	24.774	23.016	1.758		2018-07-19	24.0817	24.798	23.088	1.71		1.734
2018-07-20	Q3	7	29	201	2018-07-20	24.3599	26.182	23.064	3.118		2018-07-20	24.4211	26.5	23.064	3.436		3.277		2018-07-20	24.1754	24.895	23.304	1.591		2018-07-20	24.2421	24.944	23.376	1.568		1.5795
2018-07-21	Q3	7	29	202	2018-07-21	24.5433	26.28	23.593	2.687		2018-07-21	24.5946	26.622	23.593	3.029		2.858		2018-07-21	24.3929	25.137	23.833	1.304		2018-07-21	24.456	25.186	23.905	1.281		1.2925
2018-07-22	Q3	7	30	203	2018-07-22	24.6512	25.817	23.978	1.839		2018-07-22	24.6992	26.012	23.978	2.034		1.9365		2018-07-22	24.4766	25.089	23.881	1.208		2018-07-22	24.5423	25.162	23.954	1.208		1.208
2018-07-23	Q3	7	30	204	2018-07-23	24.7073	25.574	24.267	1.307		2018-07-23	24.7528	25.671	24.267	1.404		1.3555		2018-07-23	24.54	24.992	23.93	1.062		2018-07-23	24.6025	25.065	24.002	1.063		1.0625
2018-07-24	Q3	7	30	205	2018-07-24
2018-07-25	Q3	7	30	206	2018-07-25
2018-07-26	Q3	7	30	207	2018-07-26
2018-07-27	Q3	7	30	208	2018-07-27
2018-07-28	Q3	7	30	209	2018-07-28
2018-07-29	Q3	7	31	210	2018-07-29
2018-07-30	Q3	7	31	211	2018-07-30
2018-07-31	Q3	7	31	212	2018-07-31
2018-08-01	Q3	8	31	213	2018-08-01
2018-08-02	Q3	8	31	214	2018-08-02
2018-08-03	Q3	8	31	215	2018-08-03
2018-08-04	Q3	8	31	216	2018-08-04
2018-08-05	Q3	8	32	217	2018-08-05
2018-08-06	Q3	8	32	218	2018-08-06
2018-08-07	Q3	8	32	219	2018-08-07
2018-08-08	Q3	8	32	220	2018-08-08
2018-08-09	Q3	8	32	221	2018-08-09
2018-08-10	Q3	8	32	222	2018-08-10
2018-08-11	Q3	8	32	223	2018-08-11
2018-08-12	Q3	8	33	224	2018-08-12
2018-08-13	Q3	8	33	225	2018-08-13
2018-08-14	Q3	8	33	226	2018-08-14
2018-08-15	Q3	8	33	227	2018-08-15
2018-08-16	Q3	8	33	228	2018-08-16
2018-08-17	Q3	8	33	229	2018-08-17
2018-08-18	Q3	8	33	230	2018-08-18
2018-08-19	Q3	8	34	231	2018-08-19
2018-08-20	Q3	8	34	232	2018-08-20
2018-08-21	Q3	8	34	233	2018-08-21
2018-08-22	Q3	8	34	234	2018-08-22
2018-08-23	Q3	8	34	235	2018-08-23
2018-08-24	Q3	8	34	236	2018-08-24
2018-08-25	Q3	8	34	237	2018-08-25
2018-08-26	Q3	8	35	238	2018-08-26
2018-08-27	Q3	8	35	239	2018-08-27
2018-08-28	Q3	8	35	240	2018-08-28
2018-08-29	Q3	8	35	241	2018-08-29
2018-08-30	Q3	8	35	242	2018-08-30
2018-08-31	Q3	8	35	243	2018-08-31
2018-09-01	Q3	9	35	244	2018-09-01
2018-09-02	Q3	9	36	245	2018-09-02
2018-09-03	Q3	9	36	246	2018-09-03
2018-09-04	Q3	9	36	247	2018-09-04
2018-09-05	Q3	9	36	248	2018-09-05
2018-09-06	Q3	9	36	249	2018-09-06
2018-09-07	Q3	9	36	250	2018-09-07
2018-09-08	Q3	9	36	251	2018-09-08
2018-09-09	Q3	9	37	252	2018-09-09
2018-09-10	Q3	9	37	253	2018-09-10
2018-09-11	Q3	9	37	254	2018-09-11
2018-09-12	Q3	9	37	255	2018-09-12
2018-09-13	Q3	9	37	256	2018-09-13
2018-09-14	Q3	9	37	257	2018-09-14
2018-09-15	Q3	9	37	258	2018-09-15
2018-09-16	Q3	9	38	259	2018-09-16
2018-09-17	Q3	9	38	260	2018-09-17
2018-09-18	Q3	9	38	261	2018-09-18
2018-09-19	Q3	9	38	262	2018-09-19
2018-09-20	Q3	9	38	263	2018-09-20
2018-09-21	Q3	9	38	264	2018-09-21
2018-09-22	Q3	9	38	265	2018-09-22
2018-09-23	Q3	9	39	266	2018-09-23
2018-09-24	Q3	9	39	267	2018-09-24
2018-09-25	Q3	9	39	268	2018-09-25
2018-09-26	Q3	9	39	269	2018-09-26
2018-09-27	Q3	9	39	270	2018-09-27
2018-09-28	Q3	9	39	271	2018-09-28
2018-09-29	Q3	9	39	272	2018-09-29
2018-09-30	Q3	9	40	273	2018-09-30
2018-10-01	Q4	10	40	274	2018-10-01
2018-10-02	Q4	10	40	275	2018-10-02
2018-10-03	Q4	10	40	276	2018-10-03
2018-10-04	Q4	10	40	277	2018-10-04
2018-10-05	Q4	10	40	278	2018-10-05
2018-10-06	Q4	10	40	279	2018-10-06
2018-10-07	Q4	10	41	280	2018-10-07
2018-10-08	Q4	10	41	281	2018-10-08
2018-10-09	Q4	10	41	282	2018-10-09
2018-10-10	Q4	10	41	283	2018-10-10
2018-10-11	Q4	10	41	284	2018-10-11
2018-10-12	Q4	10	41	285	2018-10-12
2018-10-13	Q4	10	41	286	2018-10-13
2018-10-14	Q4	10	42	287	2018-10-14
2018-10-15	Q4	10	42	288	2018-10-15
2018-10-16	Q4	10	42	289	2018-10-16
2018-10-17	Q4	10	42	290	2018-10-17
2018-10-18	Q4	10	42	291	2018-10-18
2018-10-19	Q4	10	42	292	2018-10-19
2018-10-20	Q4	10	42	293	2018-10-20
2018-10-21	Q4	10	43	294	2018-10-21
2018-10-22	Q4	10	43	295	2018-10-22
2018-10-23	Q4	10	43	296	2018-10-23
2018-10-24	Q4	10	43	297	2018-10-24
2018-10-25	Q4	10	43	298	2018-10-25
2018-10-26	Q4	10	43	299	2018-10-26
2018-10-27	Q4	10	43	300	2018-10-27
2018-10-28	Q4	10	44	301	2018-10-28
2018-10-29	Q4	10	44	302	2018-10-29
2018-10-30	Q4	10	44	303	2018-10-30
2018-10-31	Q4	10	44	304	2018-10-31
2018-11-01	Q4	11	44	305	2018-11-01
2018-11-02	Q4	11	44	306	2018-11-02
2018-11-03	Q4	11	44	307	2018-11-03
2018-11-04	Q4	11	45	308	2018-11-04
2018-11-05	Q4	11	45	309	2018-11-05
2018-11-06	Q4	11	45	310	2018-11-06
2018-11-07	Q4	11	45	311	2018-11-07
2018-11-08	Q4	11	45	312	2018-11-08
2018-11-09	Q4	11	45	313	2018-11-09
2018-11-10	Q4	11	45	314	2018-11-10
2018-11-11	Q4	11	46	315	2018-11-11
2018-11-12	Q4	11	46	316	2018-11-12
2018-11-13	Q4	11	46	317	2018-11-13
2018-11-14	Q4	11	46	318	2018-11-14
2018-11-15	Q4	11	46	319	2018-11-15
2018-11-16	Q4	11	46	320	2018-11-16
2018-11-17	Q4	11	46	321	2018-11-17
2018-11-18	Q4	11	47	322	2018-11-18
2018-11-19	Q4	11	47	323	2018-11-19
2018-11-20	Q4	11	47	324	2018-11-20
2018-11-21	Q4	11	47	325	2018-11-21
2018-11-22	Q4	11	47	326	2018-11-22
2018-11-23	Q4	11	47	327	2018-11-23
2018-11-24	Q4	11	47	328	2018-11-24
2018-11-25	Q4	11	48	329	2018-11-25
2018-11-26	Q4	11	48	330	2018-11-26
2018-11-27	Q4	11	48	331	2018-11-27
2018-11-28	Q4	11	48	332	2018-11-28
2018-11-29	Q4	11	48	333	2018-11-29
2018-11-30	Q4	11	48	334	2018-11-30
2018-12-01	Q4	12	48	335	2018-12-01
2018-12-02	Q4	12	49	336	2018-12-02
2018-12-03	Q4	12	49	337	2018-12-03
2018-12-04	Q4	12	49	338	2018-12-04
2018-12-05	Q4	12	49	339	2018-12-05
2018-12-06	Q4	12	49	340	2018-12-06
2018-12-07	Q4	12	49	341	2018-12-07
2018-12-08	Q4	12	49	342	2018-12-08
2018-12-09	Q4	12	50	343	2018-12-09
2018-12-10	Q4	12	50	344	2018-12-10
2018-12-11	Q4	12	50	345	2018-12-11
2018-12-12	Q4	12	50	346	2018-12-12
2018-12-13	Q4	12	50	347	2018-12-13
2018-12-14	Q4	12	50	348	2018-12-14
2018-12-15	Q4	12	50	349	2018-12-15														2018-12-15	30.7358	31.844	30.395	1.449		2018-12-15	31.3324		30.391	0		1.449
2018-12-16	Q4	12	51	350	2018-12-16														2018-12-16	30.3891	31.053	29.765	1.288		2018-12-16	30.3907	31.075	29.761	1.314		1.301
2018-12-17	Q4	12	51	351	2018-12-17														2018-12-17	30.0818	30.572	29.314	1.258		2018-12-17	30.0848	30.593	29.335	1.258		1.258
2018-12-18	Q4	12	51	352	2018-12-18														2018-12-18	29.7628	30.319	28.741	1.578		2018-12-18	29.7707	30.34	28.736	1.604		1.591
2018-12-19	Q4	12	51	353	2018-12-19														2018-12-19	29.7285	30.344	28.865	1.479		2018-12-19	29.7407	30.34	28.86	1.48		1.4795
2018-12-20	Q4	12	51	354	2018-12-20														2018-12-20	29.6639	30.017	29.19	0.827		2018-12-20	29.6775	30.037	29.209	0.828		0.8275
2018-12-21	Q4	12	51	355	2018-12-21														2018-12-21	29.7139	30.193	29.165	1.028		2018-12-21	29.7217	30.163	29.185	0.978		1.003
2018-12-22	Q4	12	51	356	2018-12-22														2018-12-22	29.7955	30.117	29.465	0.652		2018-12-22	29.7924	30.088	29.46	0.628		0.64
2018-12-23	Q4	12	52	357	2018-12-23														2018-12-23	30.0639	30.673	29.665	1.008		2018-12-23	30.062	30.618	29.66	0.958		0.983
2018-12-24	Q4	12	52	358	2018-12-24														2018-12-24	30.3451	31.257	29.816	1.441		2018-12-24	30.3441	31.151	29.836	1.315		1.378
2018-12-25	Q4	12	52	359	2018-12-25														2018-12-25	30.57	31.896	29.715	2.181		2018-12-25	30.5741	31.944	29.71	2.234		2.2075
2018-12-26	Q4	12	52	360	2018-12-26														2018-12-26	30.4852	31.461	29.69	1.771		2018-12-26	30.4767	31.457	29.46	1.997		1.884
2018-12-27	Q4	12	52	361	2018-12-27														2018-12-27	30.5249	31.87	29.465	2.405		2018-12-27	30.5259	31.841	29.786	2.055		2.23
2018-12-28	Q4	12	52	362	2018-12-28														2018-12-28	30.553	31.793	29.816	1.977		2018-12-28	30.5526	31.816	29.811	2.005		1.991
2018-12-29	Q4	12	52	363	2018-12-29														2018-12-29	30.653	31.921	30.017	1.904		2018-12-29	30.6624	31.893	30.012	1.881		1.8925
2018-12-30	Q4	12	53	364	2018-12-30														2018-12-30	30.663	31.947	30.143	1.804		2018-12-30	30.6731	31.944	30.138	1.806		1.805
2018-12-31	Q4	12	53	365	2018-12-31														2018-12-31	30.5703	31.461	30.117	1.344		2018-12-31	30.5545	31.406	30.113	1.293		1.3185
2019-01-01	Q1	1	1	1	2019-01-01														2019-01-01	30.5135	31.181	29.866	1.315		2019-01-01	30.5053	31.151	29.886	1.265		1.29
2019-01-02	Q1	1	1	2	2019-01-02														2019-01-02	30.5356	30.977	30.042	0.935		2019-01-02	30.5288	30.973	30.012	0.961		0.948
2019-01-03	Q1	1	1	3	2019-01-03														2019-01-03	30.5724	30.901	30.218	0.683		2019-01-03	30.5651	30.872	30.214	0.658		0.6705
2019-01-04	Q1	1	1	4	2019-01-04														2019-01-04	30.2953	31.003	29.69	1.313		2019-01-04	30.2848	30.999	29.685	1.314		1.3135
2019-01-05	Q1	1	1	5	2019-01-05														2019-01-05	30.2764	30.901	29.816	1.085		2019-01-05	30.2739	30.821	29.811	1.01		1.0475
2019-01-06	Q1	1	2	6	2019-01-06														2019-01-06	30.1197	30.698	29.64	1.058		2019-01-06	30.1157	30.694	29.66	1.034		1.046
2019-01-07	Q1	1	2	7	2019-01-07														2019-01-07	30.2773	31.206	29.841	1.365		2019-01-07	30.288	31.202	29.861	1.341		1.353
2019-01-08	Q1	1	2	8	2019-01-08														2019-01-08	30.4429	31.537	29.816	1.721		2019-01-08	30.4476	31.56	29.811	1.749		1.735
2019-01-09	Q1	1	2	9	2019-01-09														2019-01-09	30.5857	31.768	29.966	1.802		2019-01-09	30.5751	31.713	29.962	1.751		1.7765
2019-01-10	Q1	1	2	10	2019-01-10														2019-01-10	30.678	31.998	30.117	1.881		2019-01-10	30.6685	31.995	30.037	1.958		1.9195
2019-01-11	Q1	1	2	11	2019-01-11														2019-01-11	30.7964	32.384	30.042	2.342		2019-01-11	30.7807	32.304	30.113	2.191		2.2665
2019-01-12	Q1	1	2	12	2019-01-12														2019-01-12	30.9742	32.436	30.319	2.117		2019-01-12	30.9443	32.304	30.315	1.989		2.053
2019-01-13	Q1	1	3	13	2019-01-13														2019-01-13	30.7339	31.64	30.193	1.447		2019-01-13	30.7217	31.611	30.163	1.448		1.4475
2019-01-14	Q1	1	3	14	2019-01-14														2019-01-14	30.5683	31.563	29.991	1.572		2019-01-14	30.5316	31.355	29.987	1.368		1.47
2019-01-15	Q1	1	3	15	2019-01-15														2019-01-15	30.7455	32.075	30.168	1.907		2019-01-15	30.741	32.021	30.163	1.858		1.8825
2019-01-16	Q1	1	3	16	2019-01-16														2019-01-16	30.7691	32.05	30.117	1.933		2019-01-16	30.7507	31.944	30.088	1.856		1.8945
2019-01-17	Q1	1	3	17	2019-01-17														2019-01-17	30.8192	31.589	30.067	1.522		2019-01-17	30.7954	31.509	30.063	1.446		1.484
2019-01-18	Q1	1	3	18	2019-01-18														2019-01-18	30.8489	31.155	30.369	0.786		2019-01-18	30.8329	31.151	30.365	0.786		0.786
2019-01-19	Q1	1	3	19	2019-01-19														2019-01-19	30.9699	31.512	30.622	0.89		2019-01-19	30.9527	31.457	30.593	0.864		0.877
2019-01-20	Q1	1	4	20	2019-01-20														2019-01-20	31.0172	31.691	30.521	1.17		2019-01-20	31.0041	31.662	30.492	1.17		1.17
2019-01-21	Q1	1	4	21	2019-01-21														2019-01-21	30.9991	31.461	30.369	1.092		2019-01-21	30.9841	31.33	30.391	0.939		1.0155
2019-01-22	Q1	1	4	22	2019-01-22														2019-01-22	31.1143	31.896	30.546	1.35		2019-01-22	31.0926	31.79	30.542	1.248		1.299
2019-01-23	Q1	1	4	23	2019-01-23														2019-01-23	30.9539	31.87	30.017	1.853		2019-01-23	30.9312	31.79	30.012	1.778		1.8155
2019-01-24	Q1	1	4	24	2019-01-24														2019-01-24	30.4922	30.774	30.067	0.707		2019-01-24	30.48	30.745	29.886	0.859		0.783
2019-01-25	Q1	1	4	25	2019-01-25														2019-01-25	30.2025	30.445	29.816	0.629		2019-01-25	30.1971	30.416	29.811	0.605		0.617
2019-01-26	Q1	1	4	26	2019-01-26														2019-01-26	30.1766	31.231	29.615	1.616		2019-01-26	30.1624	31.101	29.61	1.491		1.5535
2019-01-27	Q1	1	5	27	2019-01-27														2019-01-27	30.3001	31.64	29.59	2.05		2019-01-27	30.2828	31.585	29.56	2.025		2.0375
2019-01-28	Q1	1	5	28	2019-01-28														2019-01-28	30.3476	31.282	29.765	1.517		2019-01-28	30.332	31.151	29.761	1.39		1.4535
2019-01-29	Q1	1	5	29	2019-01-29														2019-01-29	30.492	31.665	29.565	2.1		2019-01-29	30.4748	31.636	29.56	2.076		2.088
2019-01-30	Q1	1	5	30	2019-01-30														2019-01-30	30.3358	31.13	29.265	1.865		2019-01-30	30.3271	31.101	29.284	1.817		1.841
2019-01-31	Q1	1	5	31	2019-01-31														2019-01-31	30.2112	30.698	29.364	1.334		2019-01-31	30.1995	30.694	29.36	1.334		1.334
2019-02-01	Q1	2	5	32	2019-02-01														2019-02-01	30.1282	30.42	29.69	0.73		2019-02-01	30.1206	30.391	29.685	0.706		0.718
2019-02-02	Q1	2	5	33	2019-02-02														2019-02-02	30.0637	30.344	29.74	0.604		2019-02-02	30.0566	30.34	29.736	0.604		0.604
2019-02-03	Q1	2	6	34	2019-02-03														2019-02-03	30.0467	30.42	29.515	0.905		2019-02-03	30.0343	30.365	29.51	0.855		0.88
2019-02-04	Q1	2	6	35	2019-02-04														2019-02-04	29.9524	30.269	29.314	0.955		2019-02-04	29.947	30.264	29.31	0.954		0.9545
2019-02-05	Q1	2	6	36	2019-02-05														2019-02-05	30.054	30.85	29.515	1.335		2019-02-05	30.0413	30.694	29.535	1.159		1.247
2019-02-06	Q1	2	6	37	2019-02-06														2019-02-06	30.0659	30.749	29.515	1.234		2019-02-06	30.0478	30.568	29.51	1.058		1.146
2019-02-07	Q1	2	6	38	2019-02-07														2019-02-07	30.2929	31.41	29.715	1.695		2019-02-07	30.2616	31.304	29.71	1.594		1.6445
2019-02-08	Q1	2	6	39	2019-02-08	30.5189	32.879	29.344	3.535		2019-02-08	30.5314	32.792	29.384	3.408		3.4715		2019-02-08	30.4149	31.461	29.816	1.645		2019-02-08	30.3877	31.33	29.736	1.594		1.6195
2019-02-09	Q1	2	6	40	2019-02-09	29.6296	30.45	25.844	4.606		2019-02-09	29.6433	30.44	25.859	4.581		4.5935		2019-02-09	29.9797	30.42	28.841	1.579		2019-02-09	29.9801	30.416	28.86	1.556		1.5675
2019-02-10	Q1	2	7	41	2019-02-10	30.5432	35.592	29.369	6.223		2019-02-10	30.5399	35.075	29.435	5.64		5.9315		2019-02-10	30.309	31.793	29.69	2.103		2019-02-10	30.3219	31.816	29.71	2.106		2.1045
2019-02-11	Q1	2	7	42	2019-02-11	30.6922	33.922	29.67	4.252		2019-02-11	30.6837	33.677	29.685	3.992		4.122		2019-02-11	30.5423	31.87	29.715	2.155		2019-02-11	30.5376	31.841	29.71	2.131		2.143
2019-02-12	Q1	2	7	43	2019-02-12	30.7471	33.269	29.67	3.599		2019-02-12	30.7327	33.103	29.66	3.443		3.521		2019-02-12	30.6182	31.691	29.79	1.901		2019-02-12	30.6155	31.662	29.761	1.901		1.901
2019-02-13	Q1	2	7	44	2019-02-13	30.706	32.388	29.52	2.868		2019-02-13	30.6919	32.456	29.535	2.921		2.8945		2019-02-13	30.6099	31.537	29.715	1.822		2019-02-13	30.6008	31.483	29.71	1.773		1.7975
2019-02-14	Q1	2	7	45	2019-02-14	30.6895	32.414	29.47	2.944		2019-02-14	30.6781	32.456	29.435	3.021		2.9825		2019-02-14	30.6329	31.614	29.665	1.949		2019-02-14	30.6233	31.585	29.66	1.925		1.937
2019-02-15	Q1	2	7	46	2019-02-15	30.7275	32.08	29.67	2.41		2019-02-15	30.7112	31.967	29.635	2.332		2.371		2019-02-15	30.6874	31.716	29.715	2.001		2019-02-15	30.677	31.688	29.736	1.952		1.9765
2019-02-16	Q1	2	7	47	2019-02-16	30.8707	32.028	30.021	2.007		2019-02-16	30.8509	31.916	30.037	1.879		1.943		2019-02-16	30.89	31.973	30.067	1.906		2019-02-16	30.854	31.918	30.088	1.83		1.868
2019-02-17	Q1	2	8	48	2019-02-17	30.7746	31.287	29.996	1.291		2019-02-17	30.771	31.277	29.961	1.316		1.3035		2019-02-17	30.758	31.257	30.092	1.165		2019-02-17	30.7408	31.202	30.088	1.114		1.1395
2019-02-18	Q1	2	8	49	2019-02-18	30.6375	31.083	29.946	1.137		2019-02-18	30.626	31.023	29.886	1.137		1.137		2019-02-18	30.6686	31.053	30.269	0.784		2019-02-18	30.6662	31.024	30.264	0.76		0.772
2019-02-19	Q1	2	8	50	2019-02-19	30.5849	31.109	29.795	1.314		2019-02-19	30.582	31.048	29.861	1.187		1.2505		2019-02-19	30.5966	31.13	30.042	1.088		2019-02-19	30.5926	31.126	30.037	1.089		1.0885
2019-02-20	Q1	2	8	51	2019-02-20	30.0722	30.703	27.238	3.465		2019-02-20	30.0753	30.718	27.253	3.465		3.465		2019-02-20	30.3059	30.724	28.841	1.883		2019-02-20	30.2989	30.72	28.81	1.91		1.8965
2019-02-21	Q1	2	8	52	2019-02-21	30.7084	33.139	29.545	3.594		2019-02-21	30.7159	33.051	29.61	3.441		3.5175		2019-02-21	30.6618	31.563	29.941	1.622		2019-02-21	30.6527	31.509	29.937	1.572		1.597
2019-02-22	Q1	2	8	53	2019-02-22	30.9148	35.112	29.47	5.642		2019-02-22	30.8911	34.465	29.51	4.955		5.2985		2019-02-22	30.8456	32.927	29.991	2.936		2019-02-22	30.829	32.847	29.987	2.86		2.898
2019-02-23	Q1	2	8	54	2019-02-23	30.991	34.766	29.645	5.121		2019-02-23	30.9646	34.307	29.685	4.622		4.8715		2019-02-23	30.9159	33.083	30.117	2.966		2019-02-23	30.9091	33.029	30.113	2.916		2.941
2019-02-24	Q1	2	9	55	2019-02-24	31.2643	36.591	29.921	6.67		2019-02-24	31.2441	36.255	30.011	6.244		6.457		2019-02-24	31.0145	32.927	30.067	2.86		2019-02-24	30.9888	32.821	30.063	2.758		2.809
2019-02-25	Q1	2	9	56	2019-02-25	31.331	35.245	29.996	5.249		2019-02-25	31.2928	34.889	30.137	4.752		5.0005		2019-02-25	31.1675	32.668	30.269	2.399		2019-02-25	31.1542	32.588	30.264	2.324		2.3615
2019-02-26	Q1	2	9	57	2019-02-26	31.4487	35.432	29.946	5.486		2019-02-26	31.4264	35.395	30.037	5.358		5.422		2019-02-26	31.2237	32.901	30.369	2.532		2019-02-26	31.1886	32.718	30.365	2.353		2.4425
2019-02-27	Q1	2	9	58	2019-02-27	31.3189	33.739	29.996	3.743		2019-02-27	31.2961	33.52	30.011	3.509		3.626		2019-02-27	31.2012	32.513	30.269	2.244		2019-02-27	31.1814	32.382	30.264	2.118		2.181
2019-02-28	Q1	2	9	59	2019-02-28	31.312	32.776	29.645	3.131		2019-02-28	31.2794	32.559	29.635	2.924		3.0275		2019-02-28	31.3087	32.694	30.017	2.677		2019-02-28	31.2809	32.537	30.012	2.525		2.601
2019-03-01	Q1	3	9	60	2019-03-01	31.1596	31.9	30.248	1.652		2019-03-01	31.1512	31.864	30.238	1.626		1.639		2019-03-01	31.1352	32.05	30.319	1.731		2019-03-01	31.1112	31.918	30.34	1.578		1.6545
2019-03-02	Q1	3	9	61	2019-03-02	30.8998	31.287	30.551	0.736		2019-03-02	30.9019	31.277	30.566	0.711		0.7235		2019-03-02	30.8789	31.282	30.344	0.938		2019-03-02	30.8641	31.228	30.34	0.888		0.913
2019-03-03	Q1	3	10	62	2019-03-03	31.0203	31.465	30.273	1.192		2019-03-03	31.009	31.481	30.289	1.192		1.192		2019-03-03	31.0526	31.435	30.496	0.939		2019-03-03	31.035	31.381	30.466	0.915		0.927
2019-03-04	Q1	3	10	63	2019-03-04	31.0691	31.593	30.602	0.991		2019-03-04	31.0545	31.481	30.592	0.889		0.94		2019-03-04	31.1094	31.665	30.825	0.84		2019-03-04	31.0887	31.534	30.821	0.713		0.7765
2019-03-05	Q1	3	10	64	2019-03-05	31.1745	31.849	30.678	1.171		2019-03-05	31.1563	31.711	30.668	1.043		1.107		2019-03-05	31.2081	31.819	30.724	1.095		2019-03-05	31.1875	31.662	30.72	0.942		1.0185
2019-03-06	Q1	3	10	65	2019-03-06	31.3108	32.621	30.602	2.019		2019-03-06	31.281	32.224	30.668	1.556		1.7875		2019-03-06	31.2962	32.178	30.673	1.505		2019-03-06	31.2697	32.098	30.669	1.429		1.467
2019-03-07	Q1	3	10	66	2019-03-07	31.4882	33.53	31.033	2.497		2019-03-07	31.4539	33.207	30.997	2.21		2.3535		2019-03-07	31.4671	32.333	31.003	1.33		2019-03-07	31.4506	32.253	30.999	1.254		1.292
2019-03-08	Q1	3	10	67	2019-03-08	31.5429	34.396	30.425	3.971		2019-03-08	31.5101	34.044	30.541	3.503		3.737		2019-03-08	31.4716	32.487	30.825	1.662		2019-03-08	31.4668	32.485	30.821	1.664		1.663
2019-03-09	Q1	3	10	68	2019-03-09	31.5938	35.032	30.45	4.582		2019-03-09	31.549	34.518	30.465	4.053		4.3175		2019-03-09	31.5033	32.668	30.926	1.742		2019-03-09	31.483	32.562	30.948	1.614		1.678
2019-03-10	Q1	3	11	69	2019-03-10	31.6062	35.753	29.745	6.008		2019-03-10	31.5479	34.942	29.66	5.282		5.645		2019-03-10	31.4996	33.135	30.369	2.766		2019-03-10	31.46	32.899	30.365	2.534		2.65
2019-03-11	Q1	3	11	70	2019-03-11	31.3608	34.713	29.745	4.968		2019-03-11	31.3073	34.175	29.635	4.54		4.754		2019-03-11	31.3451	32.746	30.546	2.2		2019-03-11	31.3249	32.666	30.542	2.124		2.162
2019-03-12	Q1	3	11	71	2019-03-12	31.5068	35.218	30.273	4.945		2019-03-12	31.4724	34.915	30.188	4.727		4.836		2019-03-12	31.3553	32.591	30.572	2.019		2019-03-12	31.3213	32.459	30.568	1.891		1.955
2019-03-13	Q1	3	11	72	2019-03-13	31.4394	33.373	30.526	2.847		2019-03-13	31.4217	33.311	30.516	2.795		2.821		2019-03-13	31.3377	32.178	30.673	1.505		2019-03-13	31.317	32.047	30.669	1.378		1.4415
2019-03-14	Q1	3	11	73	2019-03-14	31.5154	33.634	30.652	2.982		2019-03-14	31.4787	33.311	30.642	2.669		2.8255		2019-03-14	31.4044	32.591	30.749	1.842		2019-03-14	31.3776	32.459	30.745	1.714		1.778
2019-03-15	Q1	3	11	74	2019-03-15	31.075	31.389	30.602	0.787		2019-03-15	31.0749	31.353	30.617	0.736		0.7615		2019-03-15	31.1285	31.461	30.876	0.585		2019-03-15	31.1152	31.432	30.872	0.56		0.5725
2019-03-16	Q1	3	11	75	2019-03-16	31.0374	31.772	30.501	1.271		2019-03-16	31.0268	31.685	30.491	1.194		1.2325		2019-03-16	31.0309	31.691	30.496	1.195		2019-03-16	31.0178	31.636	30.492	1.144		1.1695
2019-03-17	Q1	3	12	76	2019-03-17	30.9206	31.619	30.147	1.472		2019-03-17	30.9107	31.532	30.137	1.395		1.4335		2019-03-17	30.886	31.691	30.017	1.674		2019-03-17	30.8784	31.662	30.012	1.65		1.662
2019-03-18	Q1	3	12	77	2019-03-18	30.6987	31.083	29.921	1.162		2019-03-18	30.6989	31.073	29.936	1.137		1.1495		2019-03-18	30.7044	31.028	30.117	0.911		2019-03-18	30.7027	31.05	30.088	0.962		0.9365
2019-03-19	Q1	3	12	78	2019-03-19	30.5073	30.855	29.77	1.085		2019-03-19	30.5066	30.87	29.785	1.085		1.085		2019-03-19	30.6129	30.85	30.193	0.657		2019-03-19	30.6076	30.846	30.189	0.657		0.657
2019-03-20	Q1	3	12	79	2019-03-20	30.3032	30.703	29.295	1.408		2019-03-20	30.3006	30.693	29.359	1.334		1.371		2019-03-20	30.4088	30.673	29.866	0.807		2019-03-20	30.4023	30.669	29.861	0.808		0.8075
2019-03-21	Q1	3	12	80	2019-03-21	30.2937	30.551	29.47	1.081		2019-03-21	30.2832	30.541	29.435	1.106		1.0935		2019-03-21	30.3465	30.521	30.017	0.504		2019-03-21	30.3421	30.517	30.012	0.505		0.5045
2019-03-22	Q1	3	12	81	2019-03-22	30.2349	30.45	29.545	0.905		2019-03-22	30.2294	30.44	29.485	0.955		0.93		2019-03-22	30.2332	30.42	29.816	0.604		2019-03-22	30.2284	30.416	29.811	0.605		0.6045
2019-03-23	Q1	3	12	82	2019-03-23	30.2304	30.728	29.095	1.633		2019-03-23	30.2166	30.617	29.035	1.582		1.6075		2019-03-23	30.2047	30.471	29.44	1.031		2019-03-23	30.1993	30.441	29.41	1.031		1.031
2019-03-24	Q1	3	13	83	2019-03-24	30.138	30.982	28.895	2.087		2019-03-24	30.1156	30.718	28.811	1.907		1.997		2019-03-24	30.1332	30.673	29.364	1.309		2019-03-24	30.126	30.644	29.335	1.309		1.309
2019-03-25	Q1	3	13	84	2019-03-25	30.4033	33.53	28.945	4.585		2019-03-25	30.3605	33.051	28.861	4.19		4.3875		2019-03-25	30.2977	31.512	29.565	1.947		2019-03-25	30.2875	31.457	29.56	1.897		1.922
2019-03-26	Q1	3	13	85	2019-03-26	30.6869	35.085	29.295	5.79		2019-03-26	30.6526	34.756	29.334	5.422		5.606		2019-03-26	30.4649	31.973	29.64	2.333		2019-03-26	30.4486	31.841	29.66	2.181		2.257
2019-03-27	Q1	3	13	86	2019-03-27	30.6917	33.765	29.22	4.545		2019-03-27	30.6659	33.494	29.26	4.234		4.3895		2019-03-27	30.525	31.665	29.665	2		2019-03-27	30.5005	31.56	29.66	1.9		1.95
2019-03-28	Q1	3	13	87	2019-03-28	30.7986	33.061	28.895	4.166		2019-03-28	30.7523	32.688	28.861	3.827		3.9965		2019-03-28	30.6231	31.793	29.415	2.378		2019-03-28	30.5967	31.662	29.41	2.252		2.315
2019-03-29	Q1	3	13	88	2019-03-29	31.0511	32.337	29.921	2.416		2019-03-29	31.022	32.121	29.886	2.235		2.3255		2019-03-29	31.014	32.075	30.092	1.983		2019-03-29	30.9879	31.995	30.088	1.907		1.945
2019-03-30	Q1	3	13	89	2019-03-30	31.1844	32.105	30.576	1.529		2019-03-30	31.1632	32.044	30.592	1.452		1.4905		2019-03-30	31.0818	32.05	30.471	1.579		2019-03-30	31.0392	31.918	30.466	1.452		1.5155
2019-03-31	Q1	3	14	90	2019-03-31	31.2578	32.105	30.652	1.453		2019-03-31	31.233	32.121	30.642	1.479		1.466		2019-03-31	31.1552	31.819	30.648	1.171		2019-03-31	31.1207	31.79	30.618	1.172		1.1715
2019-04-01	Q2	4	14	91	2019-04-01	31.1376	31.644	30.703	0.941		2019-04-01	31.1351	31.66	30.693	0.967		0.954		2019-04-01	31.1147	31.537	30.673	0.864		2019-04-01	31.0938	31.483	30.669	0.814		0.839
2019-04-02	Q2	4	14	92	2019-04-02	30.9355	31.363	30.299	1.064		2019-04-02	30.9317	31.328	30.213	1.115		1.0895		2019-04-02	30.9784	31.282	30.673	0.609		2019-04-02	30.9734	31.253	30.669	0.584		0.5965
2019-04-03	Q2	4	14	93	2019-04-03	30.8404	31.287	29.946	1.341		2019-04-03	30.822	31.302	29.81	1.492		1.4165		2019-04-03	30.9073	31.308	30.445	0.863		2019-04-03	30.9032	31.304	30.441	0.863		0.863
2019-04-04	Q2	4	14	94	2019-04-04	30.6142	31.083	29.545	1.538		2019-04-04	30.6113	31.048	29.235	1.813		1.6755		2019-04-04	30.7028	31.053	30.042	1.011		2019-04-04	30.6901	31.024	30.037	0.987		0.999
2019-04-05	Q2	4	14	95	2019-04-05	30.575	30.956	29.545	1.411		2019-04-05	30.5606	30.946	29.21	1.736		1.5735		2019-04-05	30.6808	30.926	30.117	0.809		2019-04-05	30.6718	30.923	30.113	0.81		0.8095
2019-04-06	Q2	4	14	96	2019-04-06	30.5129	30.754	29.645	1.109		2019-04-06	30.5091	30.744	29.585	1.159		1.134		2019-04-06	30.5675	30.774	30.117	0.657		2019-04-06	30.5593	30.72	30.113	0.607		0.632
2019-04-07	Q2	4	15	97	2019-04-07	30.3116	30.855	28.746	2.109		2019-04-07	30.3047	30.845	28.686	2.159		2.134		2019-04-07	30.4188	30.901	29.615	1.286		2019-04-07	30.4009	30.77	29.61	1.16		1.223
2019-04-08	Q2	4	15	98	2019-04-08	30.4113	31.261	29.595	1.666		2019-04-08	30.3926	31.099	29.485	1.614		1.64		2019-04-08	30.3911	30.952	29.916	1.036		2019-04-08	30.3816	30.872	29.962	0.91		0.973
2019-04-09	Q2	4	15	99	2019-04-09	30.6679	33.191	29.72	3.471		2019-04-09	30.6525	33.077	29.71	3.367		3.419		2019-04-09	30.5706	31.461	30.067	1.394		2019-04-09	30.5476	31.33	30.063	1.267		1.3305
2019-04-10	Q2	4	15	100	2019-04-10	30.6056	32.879	28.374	4.505		2019-04-10	30.612	32.792	28.637	4.155		4.33		2019-04-10	30.6285	31.461	29.941	1.52		2019-04-10	30.6097	31.381	29.911	1.47		1.495
2019-04-11	Q2	4	15	101	2019-04-11	30.5811	32.337	29.72	2.617		2019-04-11	30.5713	32.198	29.71	2.488		2.5525		2019-04-11	30.5288	31.333	29.916	1.417		2019-04-11	30.5229	31.253	29.911	1.342		1.3795
2019-04-12	Q2	4	15	102	2019-04-12	30.5106	31.695	29.896	1.799		2019-04-12	30.4902	31.455	29.886	1.569		1.684		2019-04-12	30.4631	31.13	30.092	1.038		2019-04-12	30.4453	31.075	30.088	0.987		1.0125
2019-04-13	Q2	4	15	103	2019-04-13	30.6249	31.951	29.946	2.005		2019-04-13	30.5925	31.685	29.936	1.749		1.877		2019-04-13	30.5546	31.359	29.991	1.368		2019-04-13	30.5256	31.228	29.987	1.241		1.3045
2019-04-14	Q2	4	16	104	2019-04-14	30.7004	31.695	29.369	2.326		2019-04-14	30.6714	31.506	29.384	2.122		2.224		2019-04-14	30.6945	31.768	29.816	1.952		2019-04-14	30.6602	31.688	29.836	1.852		1.902
2019-04-15	Q2	4	16	105	2019-04-15	30.7435	31.567	30.147	1.42		2019-04-15	30.7233	31.455	30.137	1.318		1.369		2019-04-15	30.7542	31.716	30.092	1.624		2019-04-15	30.7151	31.585	30.088	1.497		1.5605
2019-04-16	Q2	4	16	106	2019-04-16	30.6438	31.261	29.62	1.641		2019-04-16	30.6386	31.226	29.61	1.616		1.6285		2019-04-16	30.6679	31.257	30.017	1.24		2019-04-16	30.6463	31.202	29.987	1.215		1.2275
2019-04-17	Q2	4	16	107	2019-04-17	30.6537	31.211	30.047	1.164		2019-04-17	30.6515	31.201	30.062	1.139		1.1515		2019-04-17	30.695	31.206	30.369	0.837		2019-04-17	30.6788	31.151	30.34	0.811		0.824
2019-04-18	Q2	4	16	108	2019-04-18	30.6267	31.134	29.846	1.288		2019-04-18	30.6226	31.073	29.81	1.263		1.2755		2019-04-18	30.652	31.053	30.243	0.81		2019-04-18	30.6351	30.948	30.214	0.734		0.772
2019-04-19	Q2	4	16	109	2019-04-19	30.6437	31.033	29.62	1.413		2019-04-19	30.6398	31.048	29.535	1.513		1.463		2019-04-19	30.6797	31.053	30.143	0.91		2019-04-19	30.6689	31.05	30.138	0.912		0.911
2019-04-20	Q2	4	16	110	2019-04-20	30.6512	31.542	29.245	2.297		2019-04-20	30.6383	31.251	29.135	2.116		2.2065		2019-04-20	30.65	31.308	29.79	1.518		2019-04-20	30.6293	31.177	29.786	1.391		1.4545
2019-04-21	Q2	4	17	111	2019-04-21	30.5844	30.982	29.27	1.712		2019-04-21	30.5824	30.921	29.16	1.761		1.7365		2019-04-21	30.5977	30.952	29.49	1.462		2019-04-21	30.5802	30.872	29.46	1.412		1.437
2019-04-22	Q2	4	17	112	2019-04-22	30.2778	30.703	28.97	1.733		2019-04-22	30.2708	30.718	28.91	1.808		1.7705		2019-04-22	30.3969	30.673	29.64	1.033		2019-04-22	30.3796	30.669	29.635	1.034		1.0335
2019-04-23	Q2	4	17	113	2019-04-23	30.5939	32.983	29.17	3.813		2019-04-23	30.5639	32.585	29.01	3.575		3.694		2019-04-23	30.5094	31.41	29.59	1.82		2019-04-23	30.4801	31.304	29.585	1.719		1.7695
2019-04-24	Q2	4	17	114	2019-04-24	30.5077	31.926	28.572	3.354		2019-04-24	30.4886	31.813	28.513	3.3		3.327		2019-04-24	30.5085	31.181	29.64	1.541		2019-04-24	30.4763	31.075	29.135	1.94		1.7405
2019-04-25	Q2	4	17	115	2019-04-25	30.3636	31.798	28.473	3.325		2019-04-25	30.3405	31.634	28.438	3.196		3.2605		2019-04-25	30.3001	31.206	29.09	2.116		2019-04-25	30.2803	31.075	29.085	1.99		2.053
2019-04-26	Q2	4	17	116	2019-04-26	29.8489	30.147	29.27	0.877		2019-04-26	29.8491	30.137	29.26	0.877		0.877		2019-04-26	29.8613	30.117	29.364	0.753		2019-04-26	29.8503	30.138	29.36	0.778		0.7655
2019-04-27	Q2	4	17	117	2019-04-27	29.6323	30.299	29.145	1.154		2019-04-27	29.6177	30.137	29.16	0.977		1.0655		2019-04-27	29.6137	30.168	29.115	1.053		2019-04-27	29.591	30.063	29.135	0.928		0.9905
2019-04-28	Q2	4	18	118	2019-04-28	29.6795	30.475	29.045	1.43		2019-04-28	29.6591	30.339	29.06	1.279		1.3545		2019-04-28	29.6097	30.369	28.89	1.479		2019-04-28	29.5863	30.315	28.885	1.43		1.4545
2019-04-29	Q2	4	18	119	2019-04-29	29.6859	30.223	29.195	1.028		2019-04-29	29.6769	30.112	29.21	0.902		0.965		2019-04-29	29.6073	30.117	29.015	1.102		2019-04-29	29.5902	30.012	29.01	1.002		1.052
2019-04-30	Q2	4	18	120	2019-04-30	29.6521	30.122	28.97	1.152		2019-04-30	29.6452	30.137	28.96	1.177		1.1645		2019-04-30	29.5956	29.991	28.915	1.076		2019-04-30	29.5748	29.911	28.91	1.001		1.0385
2019-05-01	Q2	5	18	121	2019-05-01	29.6741	30.097	28.746	1.351		2019-05-01	29.6694	30.087	28.736	1.351		1.351		2019-05-01	29.6597	30.017	29.14	0.877		2019-05-01	29.6442	29.937	29.085	0.852		0.8645
2019-05-02	Q2	5	18	122	2019-05-02	29.7503	30.047	29.07	0.977		2019-05-02	29.7489	30.037	29.01	1.027		1.002		2019-05-02	29.7607	30.017	29.415	0.602		2019-05-02	29.7462	30.012	29.41	0.602		0.602
2019-05-03	Q2	5	18	123	2019-05-03	29.5273	29.921	28.25	1.671		2019-05-03	29.5239	29.936	28.116	1.82		1.7455		2019-05-03	29.6145	29.916	28.89	1.026		2019-05-03	29.6024	29.911	28.835	1.076		1.051
2019-05-04	Q2	5	18	124	2019-05-04	29.1398	29.77	26.137	3.633		2019-05-04	29.1423	29.785	26.176	3.609		3.621		2019-05-04	29.3132	29.765	28.071	1.694		2019-05-04	29.3032	29.761	28.016	1.745		1.7195
2019-05-05	Q2	5	19	125	2019-05-05	29.4738	30.072	28.448	1.624		2019-05-05	29.4666	30.011	28.339	1.672		1.648		2019-05-05	29.464	29.991	28.94	1.051		2019-05-05	29.4499	29.911	28.935	0.976		1.0135
2019-05-06	Q2	5	19	126	2019-05-06	29.6094	30.45	28.151	2.299		2019-05-06	29.5935	30.314	27.943	2.371		2.335		2019-05-06	29.5887	30.092	28.716	1.376		2019-05-06	29.5784	30.037	28.711	1.326		1.351
2019-05-07	Q2	5	19	127	2019-05-07	29.1181	29.77	26.993	2.777		2019-05-07	29.0877	29.785	26.762	3.023		2.9		2019-05-07	29.2475	29.765	27.553	2.212		2019-05-07	29.2326	29.761	27.547	2.214		2.213
2019-05-08	Q2	5	19	128	2019-05-08	28.946	29.445	26.944	2.501		2019-05-08	28.9103	29.46	26.615	2.845		2.673		2019-05-08	29.0626	29.44	27.676	1.764		2019-05-08	29.0399	29.435	27.67	1.765		1.7645
2019-05-09	Q2	5	19	129	2019-05-09	28.0774	29.12	22.802	6.318		2019-05-09	28.0905	29.11	22.888	6.222		6.27		2019-05-09	28.4673	29.115	26.693	2.422		2019-05-09	28.4572	29.11	26.687	2.423		2.4225
2019-05-10	Q2	5	19	130	2019-05-10	26.965	28.25	22.754	5.496		2019-05-10	26.9764	28.265	22.72	5.545		5.5205		2019-05-10	27.1933	28.245	25.255	2.99		2019-05-10	27.1814	28.264	25.248	3.016		3.003
2019-05-11	Q2	5	19	131	2019-05-11	26.5789	27.509	23.571	3.938		2019-05-11	26.5751	27.524	23.561	3.963		3.9505		2019-05-11	26.5628	27.356	25.062	2.294		2019-05-11	26.5639	27.374	25.054	2.32		2.307
2019-05-12	Q2	5	20	132	2019-05-12	26.9523	27.854	25.213	2.641		2019-05-12	26.9421	27.745	25.227	2.518		2.5795		2019-05-12	26.8391	27.627	25.183	2.444		2019-05-12	26.8338	27.596	25.2	2.396		2.42
2019-05-13	Q2	5	20	133	2019-05-13	27.2931	28.151	25.917	2.234		2019-05-13	27.2748	28.017	25.883	2.134		2.184		2019-05-13	27.2688	28.071	26.204	1.867		2019-05-13	27.2481	27.942	26.198	1.744		1.8055
2019-05-14	Q2	5	20	134	2019-05-14	27.4177	28.324	26.137	2.187		2019-05-14	27.402	28.24	26.127	2.113		2.15		2019-05-14	27.3146	27.923	26.278	1.645		2019-05-14	27.2939	27.917	26.271	1.646		1.6455
2019-05-15	Q2	5	20	135	2019-05-15	27.5781	28.448	26.161	2.287		2019-05-15	27.5693	28.413	26.151	2.262		2.2745		2019-05-15	27.5295	28.071	26.595	1.476		2019-05-15	27.5175	28.041	26.589	1.452		1.464
2019-05-16	Q2	5	20	136	2019-05-16	27.6542	28.25	26.625	1.625		2019-05-16	27.6547	28.215	26.64	1.575		1.6		2019-05-16	27.686	28.121	26.865	1.256		2019-05-16	27.6824	28.09	26.858	1.232		1.244
2019-05-17	Q2	5	20	137	2019-05-17	27.6546	28.175	26.797	1.378		2019-05-17	27.6477	28.19	26.762	1.428		1.403		2019-05-17	27.6884	28.022	27.086	0.936		2019-05-17	27.6858	28.016	27.055	0.961		0.9485
2019-05-18	Q2	5	20	138	2019-05-18	27.5291	28.002	26.015	1.987		2019-05-18	27.5304	28.017	26.054	1.963		1.975		2019-05-18	27.6007	27.997	26.816	1.181		2019-05-18	27.5942	27.991	26.785	1.206		1.1935
2019-05-19	Q2	5	21	139	2019-05-19	27.4342	27.953	25.698	2.255		2019-05-19	27.4142	27.968	25.543	2.425		2.34		2019-05-19	27.5726	27.948	26.816	1.132		2019-05-19	27.5614	27.942	26.785	1.157		1.1445
2019-05-20	Q2	5	21	140	2019-05-20	27.8007	28.572	26.944	1.628		2019-05-20	27.7715	28.339	26.762	1.577		1.6025		2019-05-20	27.7736	28.245	27.233	1.012		2019-05-20	27.7605	28.165	27.227	0.938		0.975
2019-05-21	Q2	5	21	141	2019-05-21	28.0697	29.295	27.116	2.179		2019-05-21	28.0495	29.135	27.056	2.079		2.129		2019-05-21	28.0277	28.592	27.454	1.138		2019-05-21	28.0105	28.487	27.448	1.039		1.0885
2019-05-22	Q2	5	21	142	2019-05-22	28.3034	30.273	27.165	3.108		2019-05-22	28.2694	30.011	27.056	2.955		3.0315		2019-05-22	28.2364	28.965	27.504	1.461		2019-05-22	28.2089	28.885	27.522	1.363		1.412
2019-05-23	Q2	5	21	143	2019-05-23	28.2254	29.394	26.015	3.379		2019-05-23	28.1954	29.16	25.932	3.228		3.3035		2019-05-23	28.2973	28.965	27.528	1.437		2019-05-23	28.2747	28.86	27.596	1.264		1.3505
2019-05-24	Q2	5	21	144	2019-05-24	28.1055	29.145	26.576	2.569		2019-05-24	28.0687	28.811	26.64	2.171		2.37		2019-05-24	28.1023	28.691	27.086	1.605		2019-05-24	28.0824	28.611	27.104	1.507		1.556
2019-05-25	Q2	5	21	145	2019-05-25	28.0264	29.095	26.65	2.445		2019-05-25	27.9802	28.811	26.518	2.293		2.369		2019-05-25	27.9611	28.716	26.963	1.753		2019-05-25	27.9385	28.562	26.981	1.581		1.667
2019-05-26	Q2	5	22	146	2019-05-26	28.0197	28.945	26.87	2.075		2019-05-26	27.9905	28.736	26.836	1.9		1.9875		2019-05-26	27.9839	28.642	27.184	1.458		2019-05-26	27.9602	28.512	27.178	1.334		1.396
2019-05-27	Q2	5	22	147	2019-05-27	27.9853	28.871	26.919	1.952		2019-05-27	27.9653	28.711	26.934	1.777		1.8645		2019-05-27	27.9401	28.567	27.184	1.383		2019-05-27	27.9275	28.487	27.202	1.285		1.334
2019-05-28	Q2	5	22	148	2019-05-28	28.1875	28.995	27.607	1.388		2019-05-28	28.1648	28.836	27.597	1.239		1.3135		2019-05-28	28.0797	28.642	27.381	1.261		2019-05-28	28.0643	28.636	27.399	1.237		1.249
2019-05-29	Q2	5	22	149	2019-05-29	28.2145	28.871	27.78	1.091		2019-05-29	28.2047	28.811	27.795	1.016		1.0535		2019-05-29	28.1102	28.567	27.43	1.137		2019-05-29	28.0988	28.512	27.448	1.064		1.1005
2019-05-30	Q2	5	22	150	2019-05-30	27.6092	28.101	26.797	1.304		2019-05-30	27.6069	28.116	26.811	1.305		1.3045		2019-05-30	27.5176	28.096	26.644	1.452		2019-05-30	27.5055	28.09	26.638	1.452		1.452
2019-05-31	Q2	5	22	151	2019-05-31	26.5578	27.632	24.39	3.242		2019-05-31	26.5674	27.647	24.428	3.219		3.2305		2019-05-31	26.619	27.627	25.377	2.25		2019-05-31	26.6139	27.645	25.394	2.251		2.2505
2019-06-01	Q2	6	22	152	2019-06-01	25.3068	26.821	22.898	3.923		2019-06-01	25.3208	26.811	22.96	3.851		3.887		2019-06-01	25.4801	26.816	24.239	2.577		2019-06-01	25.474	26.809	24.256	2.553		2.565
2019-06-02	Q2	6	23	153	2019-06-02	24.7875	26.186	22.036	4.15		2019-06-02	24.7959	26.2	22.146	4.054		4.102		2019-06-02	25.0719	26.204	23.854	2.35		2019-06-02	25.0729	26.198	23.87	2.328		2.339
2019-06-03	Q2	6	23	154	2019-06-03	24.5641	25.796	21.009	4.787		2019-06-03	24.573	25.81	21.071	4.739		4.763		2019-06-03	24.9271	25.814	23.661	2.153		2019-06-03	24.9248	25.807	23.653	2.154		2.1535
2019-06-04	Q2	6	23	155	2019-06-04	24.2634	25.504	21.176	4.328		2019-06-04	24.2678	25.518	21.262	4.256		4.292		2019-06-04	24.566	25.523	23.228	2.295		2019-06-04	24.559	25.515	23.244	2.271		2.283
2019-06-05	Q2	6	23	156	2019-06-05	24.217	25.431	19.771	5.66		2019-06-05	24.2216	25.397	19.832	5.565		5.6125		2019-06-05	24.5977	25.28	23.156	2.124		2019-06-05	24.5971	25.297	23.172	2.125		2.1245
2019-06-06	Q2	6	23	157	2019-06-06	24.4291	25.31	21.702	3.608		2019-06-06	24.4165	25.275	21.835	3.44		3.524		2019-06-06	24.521	25.207	23.228	1.979		2019-06-06	24.5266	25.2	23.268	1.932		1.9555
2019-06-07	Q2	6	23	158	2019-06-07	24.7793	25.48	23.234	2.246		2019-06-07	24.7466	25.47	23.056	2.414		2.33		2019-06-07	24.7537	25.28	23.565	1.715		2019-06-07	24.7493	25.2	23.581	1.619		1.667
2019-06-08	Q2	6	23	159	2019-06-08	25.187	26.308	24.004	2.304		2019-06-08	25.1621	26.078	23.898	2.18		2.242		2019-06-08	25.1475	25.985	24.095	1.89		2019-06-08	25.1381	25.881	24.232	1.649		1.7695
2019-06-09	Q2	6	24	160	2019-06-09	25.6247	27.14	24.559	2.581		2019-06-09	25.6012	26.958	24.549	2.409		2.495		2019-06-09	25.521	26.473	24.698	1.775		2019-06-09	25.501	26.271	24.715	1.556		1.6655
2019-06-10	Q2	6	24	161	2019-06-10	25.9794	27.558	24.68	2.878		2019-06-10	25.9535	27.302	24.694	2.608		2.743		2019-06-10	25.8555	26.669	25.013	1.656		2019-06-10	25.8301	26.466	25.006	1.46		1.558
2019-06-11	Q2	6	24	162	2019-06-11	26.1884	27.583	24.777	2.806		2019-06-11	26.1699	27.45	24.815	2.635		2.7205		2019-06-11	26.0723	26.718	25.28	1.438		2019-06-11	26.05	26.662	25.273	1.389		1.4135
2019-06-12	Q2	6	24	163	2019-06-12	26.0694	27.017	24.849	2.168		2019-06-12	26.053	26.983	24.791	2.192		2.18		2019-06-12	26.0236	26.546	25.086	1.46		2019-06-12	26.0126	26.491	25.103	1.388		1.424
2019-06-13	Q2	6	24	164	2019-06-13	25.7419	26.576	24.438	2.138		2019-06-13	25.743	26.518	24.501	2.017		2.0775		2019-06-13	25.6869	26.058	24.723	1.335		2019-06-13	25.6803	26.027	24.739	1.288		1.3115
2019-06-14	Q2	6	24	165	2019-06-14	25.6208	26.479	24.293	2.186		2019-06-14	25.6298	26.518	24.356	2.162		2.174		2019-06-14	25.578	25.936	24.674	1.262		2019-06-14	25.5737	25.905	24.643	1.262		1.262
2019-06-15	Q2	6	24	166	2019-06-15	25.4807	25.942	24.101	1.841		2019-06-15	25.4878	25.956	24.163	1.793		1.817		2019-06-15	25.5323	25.839	24.747	1.092		2019-06-15	25.5321	25.832	24.739	1.093		1.0925
2019-06-16	Q2	6	25	167	2019-06-16	25.0556	25.747	22.826	2.921		2019-06-16	25.0555	25.761	22.84	2.921		2.921		2019-06-16	25.1908	25.766	23.805	1.961		2019-06-16	25.1896	25.686	23.822	1.864		1.9125
2019-06-17	Q2	6	25	168	2019-06-17	25.0381	25.601	23.667	1.934		2019-06-17	25.034	25.615	23.537	2.078		2.006		2019-06-17	25.1392	25.595	24.408	1.187		2019-06-17	25.1355	25.613	24.401	1.212		1.1995
2019-06-18	Q2	6	25	169	2019-06-18	25.2908	25.917	24.149	1.768		2019-06-18	25.269	25.859	23.994	1.865		1.8165		2019-06-18	25.2759	25.741	24.602	1.139		2019-06-18	25.2727	25.71	24.57	1.14		1.1395
2019-06-19	Q2	6	25	170	2019-06-19	25.5513	26.112	24.656	1.456		2019-06-19	25.538	26.054	24.573	1.481		1.4685		2019-06-19	25.5181	25.912	25.11	0.802		2019-06-19	25.5201	25.905	25.103	0.802		0.802
2019-06-20	Q2	6	25	171	2019-06-20	25.7096	26.503	24.777	1.726		2019-06-20	25.6864	26.371	24.718	1.653		1.6895		2019-06-20	25.6791	26.18	25.134	1.046		2019-06-20	25.6734	26.124	25.127	0.997		1.0215
2019-06-21	Q2	6	25	172	2019-06-21	25.7181	26.625	23.908	2.717		2019-06-21	25.6883	26.444	23.777	2.667		2.692		2019-06-21	25.7304	26.253	24.747	1.506		2019-06-21	25.7207	26.198	24.739	1.459		1.4825
2019-06-22	Q2	6	25	173	2019-06-22	25.4759	26.039	24.197	1.842		2019-06-22	25.4545	25.859	24.042	1.817		1.8295		2019-06-22	25.4729	25.985	24.698	1.287		2019-06-22	25.4673	25.929	24.715	1.214		1.2505
2019-06-23	Q2	6	26	174	2019-06-23	25.501	26.772	24.559	2.213		2019-06-23	25.4808	26.542	24.549	1.993		2.103		2019-06-23	25.4413	26.131	24.747	1.384		2019-06-23	25.4281	26.027	24.739	1.288		1.336
2019-06-24	Q2	6	26	175	2019-06-24	25.5188	27.042	24.704	2.338		2019-06-24	25.4945	26.836	24.694	2.142		2.24		2019-06-24	25.4395	26.253	24.723	1.53		2019-06-24	25.415	26.1	24.715	1.385		1.4575
2019-06-25	Q2	6	26	176	2019-06-25	25.5461	26.87	24.438	2.432		2019-06-25	25.522	26.713	24.356	2.357		2.3945		2019-06-25	25.4597	26.351	24.747	1.604		2019-06-25	25.4351	26.173	24.764	1.409		1.5065
2019-06-26	Q2	6	26	177	2019-06-26	25.6041	26.65	24.293	2.357		2019-06-26	25.5814	26.493	24.308	2.185		2.271		2019-06-26	25.5774	26.498	24.747	1.751		2019-06-26	25.5612	26.418	24.788	1.63		1.6905
2019-06-27	Q2	6	26	178	2019-06-27	25.6689	26.699	25.043	1.656		2019-06-27	25.6534	26.566	24.936	1.63		1.643		2019-06-27	25.5831	26.131	24.892	1.239		2019-06-27	25.5722	26.124	24.909	1.215		1.227
2019-06-28	Q2	6	26	179	2019-06-28	25.6969	26.576	24.946	1.63		2019-06-28	25.6889	26.542	24.96	1.582		1.606		2019-06-28	25.6333	26.278	24.819	1.459		2019-06-28	25.6285	26.271	24.836	1.435		1.447
2019-06-29	Q2	6	26	180	2019-06-29	25.5049	25.966	24.825	1.141		2019-06-29	25.5039	25.907	24.815	1.092		1.1165		2019-06-29	25.4936	25.717	25.062	0.655		2019-06-29	25.492	25.71	25.078	0.632		0.6435
2019-06-30	Q2	6	27	181	2019-06-30	25.0971	25.747	23.667	2.08		2019-06-30	25.1045	25.737	23.681	2.056		2.068		2019-06-30	25.0688	25.547	24.046	1.501		2019-06-30	25.0667	25.54	24.063	1.477		1.489
2019-07-01	Q3	7	27	182	2019-07-01	25.1159	25.625	24.221	1.404		2019-07-01	25.1186	25.64	24.211	1.429		1.4165		2019-07-01	25.1354	25.547	24.65	0.897		2019-07-01	25.1409	25.515	24.667	0.848		0.8725
2019-07-02	Q3	7	27	183	2019-07-02	24.9547	25.407	23.523	1.884		2019-07-02	24.9449	25.397	23.585	1.812		1.848		2019-07-02	25.0294	25.377	24.167	1.21		2019-07-02	25.0287	25.37	24.159	1.211		1.2105
2019-07-03	Q3	7	27	184	2019-07-03	25.0211	25.528	23.571	1.957		2019-07-03	25.0068	25.494	23.561	1.933		1.945		2019-07-03	25.0866	25.353	24.577	0.776		2019-07-03	25.0834	25.37	24.57	0.8		0.788
2019-07-04	Q3	7	27	185	2019-07-04	25.2879	25.966	24.028	1.938		2019-07-04	25.2715	25.786	23.994	1.792		1.865		2019-07-04	25.2569	25.741	24.529	1.212		2019-07-04	25.2555	25.734	24.546	1.188		1.2
2019-07-05	Q3	7	27	186	2019-07-05	25.4589	26.699	24.076	2.623		2019-07-05	25.4298	26.469	23.994	2.475		2.549		2019-07-05	25.386	25.863	24.384	1.479		2019-07-05	25.3752	25.832	24.401	1.431		1.455
2019-07-06	Q3	7	27	187	2019-07-06	25.4382	26.283	23.86	2.423		2019-07-06	25.4156	25.981	23.753	2.228		2.3255		2019-07-06	25.4654	25.936	24.626	1.31		2019-07-06	25.4594	25.856	24.788	1.068		1.189
2019-07-07	Q3	7	28	188	2019-07-07	25.6945	28.349	23.835	4.514		2019-07-07	25.6634	28.017	23.874	4.143		4.3285		2019-07-07	25.5838	26.546	24.529	2.017		2019-07-07	25.5621	26.369	24.522	1.847		1.932
2019-07-08	Q3	7	28	189	2019-07-08	25.7896	28.696	24.197	4.499		2019-07-08	25.7557	28.314	24.211	4.103		4.301		2019-07-08	25.6226	26.742	24.457	2.285		2019-07-08	25.5911	26.515	24.449	2.066		2.1755
2019-07-09	Q3	7	28	190	2019-07-09	25.5911	26.944	23.908	3.036		2019-07-09	25.5583	26.762	23.898	2.864		2.95		2019-07-09	25.5135	26.058	24.505	1.553		2019-07-09	25.5028	26.002	24.497	1.505		1.529
2019-07-10	Q3	7	28	191	2019-07-10	25.4011	26.772	23.956	2.816		2019-07-10	25.3694	26.615	23.922	2.693		2.7545		2019-07-10	25.3063	25.863	24.384	1.479		2019-07-10	25.3035	25.832	24.401	1.431		1.455
2019-07-11	Q3	7	28	192	2019-07-11	25.3255	26.968	24.149	2.819		2019-07-11	25.3118	26.86	24.187	2.673		2.746		2019-07-11	25.1959	25.863	24.263	1.6		2019-07-11	25.1912	25.832	24.28	1.552		1.576
2019-07-12	Q3	7	28	193	2019-07-12	25.1989	26.503	24.028	2.475		2019-07-12	25.1913	26.493	24.042	2.451		2.463		2019-07-12	25.1056	25.644	24.288	1.356		2019-07-12	25.1022	25.588	24.28	1.308		1.332
2019-07-13	Q3	7	28	194	2019-07-13	25.0264	25.674	24.318	1.356		2019-07-13	25.0265	25.664	24.332	1.332		1.344		2019-07-13	24.9748	25.28	24.095	1.185		2019-07-13	24.973	25.248	24.087	1.161		1.173
2019-07-14	Q3	7	29	195	2019-07-14	24.4184	25.067	23.186	1.881		2019-07-14	24.428	25.082	23.128	1.954		1.9175		2019-07-14	24.4764	25.062	23.445	1.617		2019-07-14	24.4774	25.054	23.437	1.617		1.617
2019-07-15	Q3	7	29	196	2019-07-15	23.5932	24.753	20.843	3.91		2019-07-15	23.6052	24.767	20.809	3.958		3.934		2019-07-15	23.8825	24.747	22.724	2.023		2019-07-15	23.8866	24.764	22.74	2.024		2.0235
2019-07-16	Q3	7	29	197	2019-07-16	23.4711	24.39	21.606	2.784		2019-07-16	23.4773	24.38	21.668	2.712		2.748		2019-07-16	23.6114	24.384	22.892	1.492		2019-07-16	23.6152	24.377	22.86	1.517		1.5045
2019-07-17	Q3	7	29	198	2019-07-17	23.5469	24.125	21.678	2.447		2019-07-17	23.5365	24.115	21.715	2.4		2.4235		2019-07-17	23.6509	24.071	22.988	1.083		2019-07-17	23.6558	24.087	22.98	1.107		1.095
2019-07-18	Q3	7	29	199	2019-07-18	23.8046	24.462	22.754	1.708		2019-07-18	23.7842	24.428	22.673	1.755		1.7315		2019-07-18	23.8658	24.215	23.421	0.794		2019-07-18	23.8767	24.232	23.437	0.795		0.7945
2019-07-19	Q3	7	29	200	2019-07-19	24.2839	25.455	23.042	2.413		2019-07-19	24.2653	25.178	23.104	2.074		2.2435		2019-07-19	24.2362	24.892	23.517	1.375		2019-07-19	24.2302	24.812	23.533	1.279		1.327
2019-07-20	Q3	7	29	201	2019-07-20	24.5846	26.088	23.114	2.974		2019-07-20	24.5543	25.737	23.2	2.537		2.7555		2019-07-20	24.5575	25.231	23.757	1.474		2019-07-20	24.5427	25.103	23.725	1.378		1.426
2019-07-21	Q3	7	30	202	2019-07-21	24.6133	25.674	23.09	2.584		2019-07-21	24.5805	25.47	22.984	2.486		2.535		2019-07-21	24.6	25.207	23.733	1.474		2019-07-21	24.5924	25.127	23.725	1.402		1.438
2019-07-22	Q3	7	30	203	2019-07-22	24.6634	25.991	23.234	2.757		2019-07-22	24.6301	25.688	23.128	2.56		2.6585		2019-07-22	24.6158	25.231	23.709	1.522		2019-07-22	24.6047	25.103	23.774	1.329		1.4255
2019-07-23	Q3	7	30	204	2019-07-23	24.626	26.015	23.282	2.733		2019-07-23	24.5929	25.688	23.248	2.44		2.5865		2019-07-23	24.5449	25.134	23.733	1.401		2019-07-23	24.5306	24.982	23.725	1.257		1.329
2019-07-24	Q3	7	30	205	2019-07-24	24.765	26.576	23.547	3.029		2019-07-24	24.7366	26.298	23.537	2.761		2.895		2019-07-24	24.6343	25.547	23.781	1.766		2019-07-24	24.6048	25.37	23.798	1.572		1.669
2019-07-25	Q3	7	30	206	2019-07-25	24.9972	26.919	24.076	2.843		2019-07-25	24.9655	26.738	24.066	2.672		2.7575		2019-07-25	24.8582	25.961	24.167	1.794		2019-07-25	24.8204	25.71	24.159	1.551		1.6725
2019-07-26	Q3	7	30	207	2019-07-26	25.0316	26.479	23.932	2.547		2019-07-26	25.0056	26.346	23.922	2.424		2.4855		2019-07-26	24.913	25.741	24.215	1.526		2019-07-26	24.8765	25.515	24.232	1.283		1.4045
2019-07-27	Q3	7	30	208	2019-07-27	25.1421	26.576	24.076	2.5		2019-07-27	25.1094	26.395	24.091	2.304		2.402		2019-07-27	25.025	26.058	24.215	1.843		2019-07-27	24.9919	25.978	24.208	1.77		1.8065
2019-07-28	Q3	7	31	209	2019-07-28	25.262	26.625	24.487	2.138		2019-07-28	25.2454	26.566	24.477	2.089		2.1135		2019-07-28	25.0662	25.693	24.336	1.357		2019-07-28	25.0359	25.613	24.352	1.261		1.309
2019-07-29	Q3	7	31	210	2019-07-29	25.2471	26.43	24.559	1.871		2019-07-29	25.2384	26.395	24.573	1.822		1.8465		2019-07-29	25.0839	25.547	24.408	1.139		2019-07-29	25.0698	25.491	24.425	1.066		1.1025
2019-07-30	Q3	7	31	211	2019-07-30	25.2285	25.796	24.728	1.068		2019-07-30	25.2212	25.786	24.743	1.043		1.0555		2019-07-30	25.1836	25.571	24.747	0.824		2019-07-30	25.1778	25.564	24.739	0.825		0.8245
2019-07-31	Q3	7	31	212	2019-07-31	25.1122	25.504	24.269	1.235		2019-07-31	25.1052	25.494	24.187	1.307		1.271		2019-07-31	25.1717	25.474	24.747	0.727		2019-07-31	25.1668	25.443	24.715	0.728		0.7275
2019-08-01	Q3	8	31	213	2019-08-01	25.1567	25.747	23.884	1.863		2019-08-01	25.1415	25.664	23.729	1.935		1.899		2019-08-01	25.1514	25.62	24.408	1.212		2019-08-01	25.1414	25.54	24.425	1.115		1.1635
2019-08-02	Q3	8	31	214	2019-08-02	25.0839	25.942	22.012	3.93		2019-08-02	25.074	25.761	22.05	3.711		3.8205		2019-08-02	25.1731	25.741	23.493	2.248		2019-08-02	25.1508	25.661	23.509	2.152		2.2
2019-08-03	Q3	8	31	215	2019-08-03	24.2142	25.14	20.795	4.345		2019-08-03	24.2142	25.154	20.785	4.369		4.357		2019-08-03	24.5189	25.134	22.198	2.936		2019-08-03	24.507	25.151	22.141	3.01		2.973
2019-08-04	Q3	8	32	216	2019-08-04	24.4438	26.601	22.251	4.35		2019-08-04	24.415	26.42	22.17	4.25		4.3		2019-08-04	24.3388	24.94	23.18	1.76		2019-08-04	24.3282	24.86	22.98	1.88		1.82
2019-08-05	Q3	8	32	217	2019-08-05	24.533	27.904	22.323	5.581		2019-08-05	24.5088	27.573	22.265	5.308		5.4445		2019-08-05	24.3944	25.474	22.988	2.486		2019-08-05	24.3681	25.2	23.1	2.1		2.293
2019-08-06	Q3	8	32	218	2019-08-06	24.755	29.319	23.09	6.229		2019-08-06	24.7277	29.06	23.128	5.932		6.0805		2019-08-06	24.5067	25.887	23.084	2.803		2019-08-06	24.4779	25.637	23.076	2.561		2.682
2019-08-07	Q3	8	32	219	2019-08-07	24.948	29.095	22.994	6.101		2019-08-07	24.923	28.786	23.008	5.778		5.9395		2019-08-07	24.6681	26.156	23.613	2.543		2019-08-07	24.6398	25.929	23.605	2.324		2.4335
2019-08-08	Q3	8	32	220	2019-08-08	24.5898	26.625	23.066	3.559		2019-08-08	24.5729	26.371	23.176	3.195		3.377		2019-08-08	24.4787	24.989	23.854	1.135		2019-08-08	24.4765	24.957	23.87	1.087		1.111
2019-08-09	Q3	8	32	221	2019-08-09	24.1047	25.553	22.443	3.11		2019-08-09	24.0937	25.518	22.505	3.013		3.0615		2019-08-09	24.0501	24.602	22.82	1.782		2019-08-09	24.0531	24.594	22.836	1.758		1.77
2019-08-10	Q3	8	32	222	2019-08-10	23.7854	25.092	22.347	2.745		2019-08-10	23.775	25.057	22.385	2.672		2.7085		2019-08-10	23.5994	24.384	22.724	1.66		2019-08-10	23.5987	24.328	22.74	1.588		1.624
2019-08-11	Q3	8	33	223	2019-08-11	23.9475	25.407	23.042	2.365		2019-08-11	23.9409	25.397	23.056	2.341		2.353		2019-08-11	23.7025	24.288	22.676	1.612		2019-08-11	23.6979	24.304	22.692	1.612		1.612
2019-08-12	Q3	8	33	224	2019-08-12	24.2071	25.116	23.667	1.449		2019-08-12	24.2052	25.106	23.681	1.425		1.437		2019-08-12	24.0581	24.577	23.565	1.012		2019-08-12	24.059	24.57	23.557	1.013		1.0125
2019-08-13	Q3	8	33	225	2019-08-13	24.1535	24.68	23.282	1.398		2019-08-13	24.1558	24.67	23.32	1.35		1.374		2019-08-13	24.1688	24.553	23.661	0.892		2019-08-13	24.1689	24.497	23.653	0.844		0.868
2019-08-14	Q3	8	33	226	2019-08-14	24.36	24.825	23.258	1.567		2019-08-14	24.3513	24.791	23.2	1.591		1.579		2019-08-14	24.352	24.65	23.878	0.772		2019-08-14	24.3523	24.643	23.894	0.749		0.7605
2019-08-15	Q3	8	33	227	2019-08-15	24.4791	25.019	23.138	1.881		2019-08-15	24.472	24.96	23.056	1.904		1.8925		2019-08-15	24.4737	24.916	23.781	1.135		2019-08-15	24.467	24.812	23.798	1.014		1.0745
2019-08-16	Q3	8	33	228	2019-08-16	24.5596	25.213	23.21	2.003		2019-08-16	24.549	25.082	23.296	1.786		1.8945		2019-08-16	24.62	25.134	23.854	1.28		2019-08-16	24.6129	25.006	23.87	1.136		1.208
2019-08-17	Q3	8	33	229	2019-08-17	24.5732	25.188	23.162	2.026		2019-08-17	24.5659	25.057	23.272	1.785		1.9055		2019-08-17	24.6296	25.183	23.733	1.45		2019-08-17	24.6153	25.078	23.701	1.377		1.4135
2019-08-18	Q3	8	34	230	2019-08-18	24.1018	24.68	21.821	2.859		2019-08-18	24.0956	24.67	21.644	3.026		2.9425		2019-08-18	24.3572	24.65	23.637	1.013		2019-08-18	24.367	24.667	23.653	1.014		1.0135
2019-08-19	Q3	8	34	231	2019-08-19	23.5743	24.221	21.153	3.068		2019-08-19	23.5683	24.235	21.166	3.069		3.0685		2019-08-19	23.8217	24.215	23.204	1.011		2019-08-19	23.825	24.232	23.22	1.012		1.0115
2019-08-20	Q3	8	34	232	2019-08-20	23.3164	24.245	20.342	3.903		2019-08-20	23.302	24.163	20.404	3.759		3.831		2019-08-20	23.4384	23.781	22.653	1.128		2019-08-20	23.4418	23.798	22.668	1.13		1.129
2019-08-21	Q3	8	34	233	2019-08-21	23.3525	25.383	21.773	3.61		2019-08-21	23.3279	25.009	21.739	3.27		3.44		2019-08-21	23.2961	23.733	22.653	1.08		2019-08-21	23.2909	23.677	22.644	1.033		1.0565
2019-08-22	Q3	8	34	234	2019-08-22	23.671	27.288	22.443	4.845		2019-08-22	23.6398	27.032	22.361	4.671		4.758		2019-08-22	23.3983	24.505	22.413	2.092		2019-08-22	23.3874	24.352	22.429	1.923		2.0075
2019-08-23	Q3	8	34	235	2019-08-23	24.0086	27.263	22.802	4.461		2019-08-23	23.9809	27.056	22.792	4.264		4.3625		2019-08-23	23.6964	24.795	22.868	1.927		2019-08-23	23.6807	24.594	22.86	1.734		1.8305
2019-08-24	Q3	8	34	236	2019-08-24	24.142	26.479	22.97	3.509		2019-08-24	24.1106	26.444	22.936	3.508		3.5085		2019-08-24	23.8922	24.916	23.036	1.88		2019-08-24	23.8796	24.764	23.052	1.712		1.796
2019-08-25	Q3	8	35	237	2019-08-25	24.3033	26.356	23.042	3.314		2019-08-25	24.2776	26.151	23.032	3.119		3.2165		2019-08-25	24.0881	25.328	23.276	2.052		2019-08-25	24.0689	25.248	23.292	1.956		2.004
2019-08-26	Q3	8	35	238	2019-08-26	24.5759	26.088	23.811	2.277		2019-08-26	24.5512	26.054	23.801	2.253		2.265		2019-08-26	24.4779	25.595	23.661	1.934		2019-08-26	24.4574	25.564	23.653	1.911		1.9225
2019-08-27	Q3	8	35	239	2019-08-27	24.8001	25.917	24.269	1.648		2019-08-27	24.7868	25.883	24.283	1.6		1.624		2019-08-27	24.6094	25.304	24.215	1.089		2019-08-27	24.5994	25.297	24.208	1.089		1.089
2019-08-28	Q3	8	35	240	2019-08-28	24.6471	25.334	24.245	1.089		2019-08-28	24.6457	25.348	24.259	1.089		1.089		2019-08-28	24.6024	25.037	24.263	0.774		2019-08-28	24.5973	25.006	24.28	0.726		0.75
2019-08-29	Q3	8	35	241	2019-08-29	24.5916	25.14	23.427	1.713		2019-08-29	24.5877	25.13	23.392	1.738		1.7255		2019-08-29	24.6277	25.207	24.095	1.112		2019-08-29	24.6298	25.2	24.087	1.113		1.1125
2019-08-30	Q3	8	35	242	2019-08-30	24.6207	25.213	23.138	2.075		2019-08-30	24.6077	25.13	23.008	2.122		2.0985		2019-08-30	24.6201	25.062	23.757	1.305		2019-08-30	24.6138	24.957	23.725	1.232		1.2685
2019-08-31	Q3	8	35	243	2019-08-31	24.7844	25.601	23.21	2.391		2019-08-31	24.7779	25.518	23.128	2.39		2.3905		2019-08-31	24.7447	25.401	23.372	2.029		2019-08-31	24.7371	25.321	23.341	1.98		2.0045
2019-09-01	Q3	9	36	244	2019-09-01	25.0318	27.657	23.354	4.303		2019-09-01	25.0241	27.327	23.441	3.886		4.0945		2019-09-01	24.9268	25.839	23.445	2.394		2019-09-01	24.9197	25.759	23.461	2.298		2.346
2019-09-02	Q3	9	36	245	2019-09-02	25.1708	29.319	23.258	6.061		2019-09-02	25.1596	29.035	23.32	5.715		5.888		2019-09-02	25.0357	26.229	23.493	2.736		2019-09-02	25.0091	26.198	23.509	2.689		2.7125
2019-09-03	Q3	9	36	246	2019-09-03	25.3868	30.652	23.354	7.298		2019-09-03	25.3874	30.44	23.489	6.951		7.1245		2019-09-03	25.2075	27.454	24.191	3.263		2019-09-03	25.1749	27.178	24.159	3.019		3.141
2019-09-04	Q3	9	36	247	2019-09-04	25.5935	31.465	23.787	7.678		2019-09-04	25.5913	31.328	23.898	7.43		7.554		2019-09-04	25.3124	27.184	24.119	3.065		2019-09-04	25.2971	27.055	24.135	2.92		2.9925
2019-09-05	Q3	9	36	248	2019-09-05	25.7512	31.414	24.052	7.362		2019-09-05	25.7436	31.302	24.163	7.139		7.2505		2019-09-05	25.3606	27.086	24.457	2.629		2019-09-05	25.3424	26.956	24.473	2.483		2.556
2019-09-06	Q3	9	36	249	2019-09-06	25.7602	30.399	24.245	6.154		2019-09-06	25.7387	30.062	24.163	5.899		6.0265		2019-09-06	25.383	26.914	24.457	2.457		2019-09-06	25.3585	26.785	24.473	2.312		2.3845
2019-09-07	Q3	9	36	250	2019-09-07	25.6619	28.473	23.98	4.493		2019-09-07	25.6425	28.165	23.994	4.171		4.332		2019-09-07	25.3778	26.595	24.529	2.066		2019-09-07	25.3473	26.418	24.546	1.872		1.969
2019-09-08	Q3	9	37	251	2019-09-08	25.7129	27.558	24.535	3.023		2019-09-08	25.708	27.45	24.525	2.925		2.974		2019-09-08	25.4829	26.449	24.723	1.726		2019-09-08	25.4409	26.246	24.715	1.531		1.6285
2019-09-09	Q3	9	37	252	2019-09-09	25.9409	27.337	25.237	2.1		2019-09-09	25.9328	27.376	25.251	2.125		2.1125		2019-09-09	25.7119	26.498	25.11	1.388		2019-09-09	25.6852	26.491	25.127	1.364		1.376
2019-09-10	Q3	9	37	253	2019-09-10	25.6954	26.503	25.14	1.363		2019-09-10	25.7004	26.518	25.154	1.364		1.3635		2019-09-10	25.614	26.351	24.819	1.532		2019-09-10	25.5979	26.32	24.812	1.508		1.52
2019-09-11	Q3	9	37	254	2019-09-11	25.6772	26.161	25.237	0.924		2019-09-11	25.6819	26.151	25.227	0.924		0.924		2019-09-11	25.6847	26.156	25.28	0.876		2019-09-11	25.6708	26.124	25.248	0.876		0.876
2019-09-12	Q3	9	37	255	2019-09-12	25.5104	26.088	24.318	1.77		2019-09-12	25.5221	26.078	24.308	1.77		1.77		2019-09-12	25.5427	25.985	24.965	1.02		2019-09-12	25.5361	25.978	24.982	0.996		1.008
2019-09-13	Q3	9	37	256	2019-09-13	25.5628	26.088	24.149	1.939		2019-09-13	25.5768	26.078	24.042	2.036		1.9875		2019-09-13	25.5936	26.058	24.94	1.118		2019-09-13	25.5779	25.905	24.933	0.972		1.045
2019-09-14	Q3	9	37	257	2019-09-14	25.6427	26.332	24.101	2.231		2019-09-14	25.6528	26.346	23.922	2.424		2.3275		2019-09-14	25.6758	26.375	24.723	1.652		2019-09-14	25.6571	26.246	24.715	1.531		1.5915
2019-09-15	Q3	9	38	258	2019-09-15	25.7344	27.288	23.739	3.549		2019-09-15	25.7348	27.204	23.633	3.571		3.56		2019-09-15	25.7661	26.644	24.844	1.8		2019-09-15	25.7452	26.491	24.836	1.655		1.7275
2019-09-16	Q3	9	38	259	2019-09-16	25.9725	29.12	24.197	4.923		2019-09-16	25.966	28.885	24.115	4.77		4.8465		2019-09-16	25.912	26.84	25.134	1.706		2019-09-16	25.8893	26.662	25.151	1.511		1.6085
2019-09-17	Q3	9	38	260	2019-09-17	26.1479	30.072	24.632	5.44		2019-09-17	26.1656	30.011	24.743	5.268		5.354		2019-09-17	26.0431	27.086	25.28	1.806		2019-09-17	26.0128	26.932	25.273	1.659		1.7325
2019-09-18	Q3	9	38	261	2019-09-18	26.3213	30.273	24.922	5.351		2019-09-18	26.3332	30.314	24.985	5.329		5.34		2019-09-18	26.1762	27.602	25.425	2.177		2019-09-18	26.149	27.424	25.418	2.006		2.0915
2019-09-19	Q3	9	38	262	2019-09-19	26.5886	31.593	25.334	6.259		2019-09-19	26.5917	31.251	25.397	5.854		6.0565		2019-09-19	26.3631	27.775	25.425	2.35		2019-09-19	26.342	27.596	25.564	2.032		2.191
2019-09-20	Q3	9	38	263	2019-09-20	26.8103	31.644	25.553	6.091		2019-09-20	26.8174	31.532	25.591	5.941		6.016		2019-09-20	26.5663	28.17	25.863	2.307		2019-09-20	26.5358	28.016	25.856	2.16		2.2335
2019-09-21	Q3	9	38	264	2019-09-21	26.5125	29.319	25.455	3.864		2019-09-21	26.5197	29.135	25.445	3.69		3.777		2019-09-21	26.3684	27.282	25.936	1.346		2019-09-21	26.3516	27.202	25.905	1.297		1.3215
2019-09-22	Q3	9	39	265	2019-09-22	26.5187	28.796	25.019	3.777		2019-09-22	26.5229	28.711	25.009	3.702		3.7395		2019-09-22	26.3236	27.479	25.523	1.956		2019-09-22	26.2956	27.276	25.515	1.761		1.8585
2019-09-23	Q3	9	39	266	2019-09-23	26.7712	29.495	25.747	3.748		2019-09-23	26.7658	29.435	25.761	3.674		3.711		2019-09-23	26.5255	28.195	25.79	2.405		2019-09-23	26.4863	28.041	25.783	2.258		2.3315
2019-09-24	Q3	9	39	267	2019-09-24	26.4418	27.657	25.698	1.959		2019-09-24	26.4411	27.597	25.713	1.884		1.9215		2019-09-24	26.2629	27.086	25.28	1.806		2019-09-24	26.2516	27.006	25.297	1.709		1.7575
2019-09-25	Q3	9	39	268	2019-09-25	26.5705	27.928	25.893	2.035		2019-09-25	26.5773	27.894	25.907	1.987		2.011		2019-09-25	26.3534	26.938	25.766	1.172		2019-09-25	26.3403	26.932	25.759	1.173		1.1725
2019-09-26	Q3	9	39	269	2019-09-26	26.5375	27.288	26.088	1.2		2019-09-26	26.5483	27.302	26.102	1.2		1.2		2019-09-26	26.4924	27.012	25.863	1.149		2019-09-26	26.4816	26.956	25.856	1.1		1.1245
2019-09-27	Q3	9	39	270	2019-09-27	26.45	26.968	25.674	1.294		2019-09-27	26.4592	26.958	25.761	1.197		1.2455		2019-09-27	26.4872	26.987	26.18	0.807		2019-09-27	26.4762	26.956	26.173	0.783		0.795
2019-09-28	Q3	9	39	271	2019-09-28	26.4064	27.091	25.261	1.83		2019-09-28	26.4249	27.106	25.421	1.685		1.7575		2019-09-28	26.4677	26.987	25.839	1.148		2019-09-28	26.4556	26.907	25.832	1.075		1.1115
2019-09-29	Q3	9	40	272	2019-09-29	26.4864	27.484	25.067	2.417		2019-09-29	26.5039	27.376	25.203	2.173		2.295		2019-09-29	26.5511	27.307	25.863	1.444		2019-09-29	26.535	27.178	25.856	1.322		1.383
2019-09-30	Q3	9	40	273	2019-09-30	26.8236	29.745	25.261	4.484		2019-09-30	26.8445	29.735	25.397	4.338		4.411		2019-09-30	26.8014	27.874	25.62	2.254		2019-09-30	26.7776	27.719	25.613	2.106		2.18
2019-10-01	Q4	10	40	274	2019-10-01	26.6943	26.87	26.576	0.294		2019-10-01	26.7048	26.885	26.615	0.27		0.282		2019-10-01	26.6789	26.84	26.571	0.269		2019-10-01	26.685	26.834	26.564	0.27		0.2695

## Sheet: daily temp range - summary
Row Labels	Mean IT DTR	Mean ST DTR			Row Labels	Mean IT DTR	Mean ST DTR		Row Labels	Mean IT DTR	Mean ST DTR				Mean IT DTR	Mean ST DTR	Stdev of IT avg	Stdevp of ST avg
1	2.7263	1.31152			Q1	2.68487	1.39173		1	4.0086	1.42705				2.61552	1.42439	1.48559	0.535819
2	2.82748	1.49581			Q2	2.16327	1.3671		2	1.92014	1.23557
3	2.53188	1.37645			Q3	2.73768	1.43727		3	2.97233	1.22659
4	2.0942	1.32197			Q4	2.98387	1.52093		4	2.34031	1.27864
5	2.19981	1.40796			(blank)				5	2.82881	1.32861
6	2.19459	1.37002			Grand Total	2.61552	1.42439		6	2.57896	1.36636
7	2.097	1.26447							7	2.71764	1.57154
8	2.70338	1.39463							8	2.62534	1.59832
9	3.38359	1.63903							9	3.18975	1.50598
10	3.07604	1.57913							10	2.77884	1.49759
11	3.13126	1.59897							11	2.47898	1.31023
12	2.74808	1.40734							12	2.24596	1.28534
(blank)									13	2.46763	1.35886
Grand Total	2.61552	1.42439							14	2.58216	1.36152
									15	1.92854	1.20211
									16	2.18123	1.46179
Max		Max							17	1.85679	1.23177
IT		38.0895							18	2.16586	1.47657
ST		33.835							19	2.00164	1.3078
									20	2.97104	1.83655
Mean	Mean	Max	Min						21	1.81687	1.15757
IT	28.4209	29.8389	27.2696						22	2.2613	1.4025
ST	28.4288	29.1318	27.7176						23	2.43882	1.48704
									24	2.43509	1.47911
									25	1.79334	1.2073
									26	2.03979	1.31186
									27	1.7807	1.17079
									28	2.09888	1.26404
									29	2.3083	1.29868
									30	2.248	1.33478
									31	2.04593	1.4226
									32	2.7809	1.40102
									33	2.81957	1.40486
									34	2.72533	1.1791
									35	2.7855	1.54152
									36	3.74894	1.77146
									37	3.29463	1.50491
									38	3.16289	1.49336
									39	3.57721	1.78405
									40	2.65646	1.57192
									41	3.78655	1.66376
									42	2.33521	1.33612
									43	3.9509	1.79217
									44	2.15538	1.39471
									45	3.94805	1.64138
									46	2.2055	1.34043
									47	4.01429	1.85721
									48	2.32419	1.53238
									49	3.87269	1.80617
									50	2.25886	1.3005
									51	3.53543	1.44832
									52	1.92986	1.34396
									53	2.28215	1.24927
									(blank)
									Grand Total	2.61552	1.42439

## Sheet: daily temp range - t-test
t-test to compare the daily temperature range (DTR) of the intertidal IT) vs subtidal (ST)
Date	DTR IT	DTR ST
2015-09-01	4.731
2015-09-02	5.5865	2.773						t-Test: Two-Sample Assuming Unequal Variances
2015-09-03	7.234	3.379
2015-09-04	5.8875	2.858							DTR IT	DTR ST
2015-09-05	5.7745	2.566							Variable 1	Variable 2
2015-09-06	5.159	2.325						Mean	2.59277	1.40484
2015-09-07	3.795	1.564						Variance	2.22559	0.282982
2015-09-08	2.504	1.641						Observations	1057	1055
2015-09-09	1.3595	1.002						Hypothesized Mean Difference	0
2015-09-10	1.453	0.831						df	1321
2015-09-11	1.7395	1						t Stat	24.3819
2015-09-12	2.3835	1.391						P(T<=t) one-tail	5.07949e-109
2015-09-13	2.07	1.464						t Critical one-tail	1.64601
2015-09-14	2.635	1.49						P(T<=t) two-tail	1.0159e-108
2015-09-15	3.256	1.661						t Critical two-tail	1.96176
2015-09-16	2.246	1.148
2015-09-17	2.7345	1.051
2015-09-18	5.5665	1.913
2015-09-19	6.4055	1.991
2015-09-20	5.8925	2.02
2015-09-21	4.409	1.949
2015-09-22	3.7835	1.527
2015-09-23	2.8875	2.267
2015-09-24	2.1945	1.376
2015-09-25	2.1975	1.982
2015-09-26	1.398	0.908
2015-09-27	2.1875	1.372
2015-09-28	2.1535	1.643
2015-09-29	3.753	1.744
2015-09-30	4.375	2.382
2015-10-01	6.9635	4.499
2015-10-02	6.6705	3.448
2015-10-03	7.203	2.824
2015-10-04	6.795	2.501
2015-10-05	3.823	1.709
2015-10-06	3.681	2.204
2015-10-07	1.9965	1.808
2015-10-08	1.375	1.287
2015-10-09	1.162	0.792
2015-10-10	0.89	0.693
2015-10-11	1.2725	1.014
2015-10-12	1.5105	1.141
2015-10-13	2.7105	1.415
2015-10-14	2.194	1.14
2015-10-15	4.5465	1.393
2015-10-16	5.734	1.672
2015-10-17	4.8965	2.149
2015-10-18	4.338	2.099
2015-10-19	5.107	2.153
2015-10-20	4.544	1.979
2015-10-21	4.1215	1.957
2015-10-22	3.079	1.783
2015-10-23	2.1885	1.304
2015-10-24	1.617	1.051
2015-10-25	1.3115	0.825
2015-10-26	1.275	0.876
2015-10-27	1.5595	0.899
2015-10-28	3.1465	1.352
2015-10-29	4.2365	2.522
2015-10-30	4.895	3.243
2015-10-31	6.2975	3.045
2015-11-01	5.142	2.25
2015-11-02	3.8295	1.69
2015-11-03	3.787	1.741
2015-11-04	3.448	2.254
2015-11-05	2.269	1.668
2015-11-06	1.6055	1.009
2015-11-07	1.6745	1.006
2015-11-08	1.2915	0.978
2015-11-09	1.452	1.053
2015-11-10	1.9145	1.304
2015-11-11	2.233	1.433
2015-11-12	2.7475	1.534
2015-11-13	3.698	1.537
2015-11-14	4.3845	2.001
2015-11-15	4.366	2.251
2015-11-16	5.452	2.459
2015-11-17	7.051	2.389
2015-11-18	6.5995	2.339
2015-11-19	5.1355	2.567
2015-11-20	4.0575	2.115
2015-11-21	2.801	2.011
2015-11-22	2.2395	1.573
2015-11-23	1.4735	0.915
2015-11-24	1.5825	0.761
2015-11-25	1.43	1.317
2015-11-26	2.2965	1.571
2015-11-27	4.034	1.704
2015-11-28	4.646	2.325
2015-11-29	6.297	2.976
2015-11-30	5.8825	2.618
2015-12-01	6.0435	2.665
2015-12-02	6.114	2.121
2015-12-03	4.4915	2.094
2015-12-04	3.846	2.151
2015-12-05	2.1035	1.794
2015-12-06	1.7035	1.381
2015-12-07	1.737	1.354
2015-12-08	1.4805	0.944
2015-12-09	1.8145	0.993
2015-12-10	1.3205	0.637
2015-12-11	2.025	1.048
2015-12-12	1.9435	1.279
2015-12-13	4.6895	1.719
2015-12-14	5.5855	2.448
2015-12-15	5.341	2.213
2015-12-16	7.291	2.526
2015-12-17	6.648	2.809
2015-12-18	4.5385	1.956
2015-12-19	2.5345	1.435
2015-12-20	2.8675	1.788
2015-12-21	2.768	1.704
2015-12-22	2.266	1.293
2015-12-23	1.7175	1.164
2015-12-24	1.902	1.112
2015-12-25	2.118	1.435
2015-12-26	2.247	1.331
2015-12-27	3.4775	2.174
2015-12-28	2.6435	1.287
2015-12-29	4.1915	1.543
2015-12-30	4.7205	2.046
2015-12-31	3.935	1.944
2016-01-01	4.7815	2.124
2016-01-02	3.8905	2.072
2016-01-03	3.3005	1.868
2016-01-04	2.3825	1.314
2016-01-05	2.075	1.388
2016-01-06	1.7155	1.035
2016-01-07	1.175	0.657
2016-01-08	1.377	0.506
2016-01-09	2.369	0.884
2016-01-10	2.7315	1.066
2016-01-11	2.646	1.319
2016-01-12	2.724	1.681
2016-01-13	5.504	0.737
2016-01-14	6.224
2016-01-15	2.794	1.096
2016-01-16	6.891	1.991
2016-01-17	6.177	2.277
2016-01-18	3.964	2.204
2016-01-19	2.512	2.155
2016-01-20	1.618	1.479
2016-01-21	1.666	1.147
2016-01-22	1.2545	0.763
2016-01-23	1.1045	1.145
2016-01-24	2.0145	0.66
2016-01-25	1.281	1.119
2016-01-26	1.662	0.986
2016-01-27	4.6145	1.762
2016-01-28	4.2065	1.628
2016-01-29	3.3905	1.321
2016-01-30	3.438	1.368
2016-01-31	1.745	1.238
2016-02-01	3.2875	2.024
2016-02-02	2.983	1.774
2016-02-03	1.5795	1.57
2016-02-04	1.912	1.924
2016-02-05	1.6305	1.444
2016-02-06	1.212	0.759
2016-02-07	1.088	0.736
2016-02-08	1.2815	1.119
2016-02-09	2.5955	1.401
2016-02-10	5.139	1.991
2016-02-11	3.6735	2.125
2016-02-12	5.105	2.845
2016-02-13	4.5905	2.227
2016-02-14	5.726	2.621
2016-02-15	5.212	2.439
2016-02-16	4.122	1.928
2016-02-17	2.9665	2.079
2016-02-18	1.963	2.028
2016-02-19	1.276	1.099
2016-02-20	1.3865	1.198
2016-02-21	1.8295	0.817
2016-02-22	1.1865	0.741
2016-02-23	3.443	1.432
2016-02-24	4.096	1.691
2016-02-25	5.5365	2.029
2016-02-26	3.428	1.441
2016-02-27	5.036	1.531
2016-02-28	5.7035	2.201
2016-02-29	5.475	2.278
2016-03-01	4.367	2.138
2016-03-02	3.652	2.326
2016-03-03	2.372	2.174
2016-03-04	1.7085	1.672
2016-03-05	1.3605	1.078
2016-03-06	1.328	0.769
2016-03-07	2.707	1.123
2016-03-08	1.0845	0.742
2016-03-09	1.5435	1.152
2016-03-10	3.898	1.538
2016-03-11	4.158	2.184
2016-03-12	4.662	2.443
2016-03-13	5.8065	2.168
2016-03-14	5.104	2.142
2016-03-15	1.495	1.232
2016-03-16	3.0065	1.69
2016-03-17	2.701	1.51
2016-03-18	2.1285	1.504
2016-03-19	1.5355	1.373
2016-03-20	1.6315	0.864
2016-03-21	1.6435	0.788
2016-03-22	1.762	0.739
2016-03-23	1.3745	0.995
2016-03-24	3.3445	1.609
2016-03-25	3.038	1.486
2016-03-26	3.5915	1.898
2016-03-27	4.7515	2.105
2016-03-28	5.2645	2.132
2016-03-29	4.5125	2.107
2016-03-30	3.768	1.979
2016-03-31	3.3855	2.107
2016-04-01	2.2495	2.089
2016-04-02	1.383	1.232
2016-04-03	1.5145	1.205
2016-04-04	1.677	1.155
2016-04-05	1.175	0.794
2016-04-06	0.6885	0.664
2016-04-07	1.0185	0.74
2016-04-08	1.921	1.733
2016-04-09	2.1245	1.886
2016-04-10	2.796	2.314
2016-04-11	3.7045	2.252
2016-04-12	3.606	2.226
2016-04-13	2.6435	1.871
2016-04-14	2.592	1.892
2016-04-15	2.2285	1.71
2016-04-16	1.438	1.35
2016-04-17	1.5885	1.373
2016-04-18	0.991	0.891
2016-04-19	1.0015	0.814
2016-04-20	1.164	0.913
2016-04-21	1.2155	1.041
2016-04-22	1.391	1.115
2016-04-23	1.431	1.118
2016-04-24	2.5025	1.9
2016-04-25	2.531	1.926
2016-04-26	2.9535	2.054
2016-04-27	2.765	1.978
2016-04-28	2.422	1.952
2016-04-29	2.5465	1.877
2016-04-30	2.2245	1.596
2016-05-01	2.147	1.773
2016-05-02	1.5685	1.266
2016-05-03	1.415	1.064
2016-05-04	0.898	0.659
2016-05-05	0.8075	0.507
2016-05-06	1.7925	1.109
2016-05-07	1.266	1.081
2016-05-08	1.0795	0.829
2016-05-09	4.5955	3.968
2016-05-10	4.1625	2.917
2016-05-11	3.0895	2.071
2016-05-12	2.795	1.502
2016-05-13	3.422	2.343
2016-05-14	1.637	1.39
2016-05-15	1.554	1.294
2016-05-16	1.28	1.242
2016-05-17	1.1935	1.07
2016-05-18	1.068	0.821
2016-05-19	1.4115	1.068
2016-05-20	0.8445	0.672
2016-05-21	1.0805	0.747
2016-05-22	1.6245	1.069
2016-05-23	3.3575	2.398
2016-05-24	1.905	1.536
2016-05-25	1.573	1.141
2016-05-26	2.06	1.49
2016-05-27	2.3195	1.566
2016-05-28	2.396	1.591
2016-05-29	2.378	1.544
2016-05-30	2.2985	1.642
2016-05-31	1.842	1.295
2016-06-01	1.594	1.196
2016-06-02	1.182	0.896
2016-06-03	0.9955	0.747
2016-06-04	1.216	0.846
2016-06-05	1.0435	0.747
2016-06-06	1.699	1.54
2016-06-07	2.02	1.344
2016-06-08	4.463	3.054
2016-06-09	4.779	3.207
2016-06-10	3.0125	1.949
2016-06-11	2.14	1.802
2016-06-12	1.9275	1.44
2016-06-13	2.519	2.071
2016-06-14	1.421	1.298
2016-06-15	1.006	1.006
2016-06-16	0.957	0.86
2016-06-17	0.983	0.86
2016-06-18	0.9565	0.884
2016-06-19	2.218	1.759
2016-06-20	1.3655	0.928
2016-06-21	1.4275	1.076
2016-06-22	1.6005	1.297
2016-06-23	1.7	1.323
2016-06-24	1.555	1.251
2016-06-25	2.5515	1.67
2016-06-26	2.1125	1.201
2016-06-27	1.4755	0.977
2016-06-28	2.1405	1.565
2016-06-29	1.6685	1.103
2016-06-30	1.4255	0.982
2016-07-01	1.388	0.933
2016-07-02	0.7735	0.639
2016-07-03	1.1265	0.884
2016-07-04	0.895	0.589
2016-07-05	1.1885	0.835
2016-07-06	1.5925	1.13
2016-07-07	1.4835	1.155
2016-07-08	2.0775	1.4
2016-07-09	2.2545	1.55
2016-07-10	1.7965	1.008
2016-07-11	1.1965	0.71
2016-07-12	1.7505	1.195
2016-07-13	1.6205	1.163
2016-07-14	1.295	0.992
2016-07-15	0.846	0.943
2016-07-16	1.6385	1.758
2016-07-17	1.353	1.377
2016-07-18	1.342	1.065
2016-07-19	1.3895	0.92
2016-07-20	1.464	0.969
2016-07-21	1.611	1.334
2016-07-22	1.4295	1.115
2016-07-23	2.1615	1.408
2016-07-24	2.059	1.14
2016-07-25	2.089	1.165
2016-07-26	1.859	1.334
2016-07-27	2.806	1.604
2016-07-28	1.897	1.336
2016-07-29	1.8315	1.334
2016-07-30	1.845	1.406
2016-07-31	1.2735	1.091
2016-08-01	1.4265	0.994
2016-08-02	2.912	1.932
2016-08-03	2.057	1.254
2016-08-04	1.555	1.087
2016-08-05	1.0615	0.99
2016-08-06	2.303	1.211
2016-08-07	3.932	1.576
2016-08-08	4.833	1.798
2016-08-09	4.358	2.044
2016-08-10	3.328	1.656
2016-08-11	1.876	0.827
2016-08-12	1.9	1.192
2016-08-13	1.682	1.337
2016-08-14	1.368	1.048
2016-08-15	0.977	0.585
2016-08-16	0.976	0.634
2016-08-17	1.364	0.999
2016-08-18	1.509	1.193
2016-08-19	2.4	1.143
2016-08-20	2.23	1.094
2016-08-21	2.582	1.411
2016-08-22	4.58	2.239
2016-08-23	3.454	1.357
2016-08-24	4.233	1.862
2016-08-25	3.892	1.835
2016-08-26	3.35	1.549
2016-08-27	3.148	1.896
2016-08-28	1.903	1.388
2016-08-29	0.658	0.633
2016-08-30	1.116	0.608
2016-08-31	0.827	0.389
2016-09-01	1.41	1.023
2016-09-02	1.579	0.924
2016-09-03	2.362	1.607
2016-09-04	2.124	1.244
2016-09-05	5.347	1.567
2016-09-06	5.61	1.666
2016-09-07	5.294	2.035
2016-09-08	4.573	1.717
2016-09-09	3.094	1.544
2016-09-10	2.952	1.718
2016-09-11	2.113	2.159
2016-09-12	1.624	1.671
2016-09-13	1.107	1.081
2016-09-14	1.395	1.029
2016-09-15	1.733	0.954
2016-09-16	1.539	1.003
2016-09-17	1.493	1.25
2016-09-18	2.027	1.469
2016-09-19	4.024	1.816
2016-09-20	3.024	1.593
2016-09-21	4.52	1.888
2016-09-22	6.604	2.782
2016-09-23	5.21	2.343
2016-09-24	4.514	2.145
2016-09-25	2.942	1.973
2016-09-26	2.203	1.579
2016-09-27	1.359	1.184
2016-09-28	1.405	0.715
2016-09-29	1.059	0.69
2016-09-30	1.403	0.913
2016-10-01	1.403	1.133
2016-10-02	1.11	1.012
2016-10-03	2.35	1.277
2016-10-04	2.074	0.937
2016-10-05	5.568	1.81
2016-10-06	5.219	1.838
2016-10-07	5.724	1.939
2016-10-08	3.535	2.014
2016-10-09	3.209	2.272
2016-10-10	2.301	1.946
2016-10-11	1.725	1.7
2016-10-12	1.7	1.122
2016-10-13	1.297	1.222
2016-10-14	1.394	0.923
2016-10-15	1.319	0.997
2016-10-16	1.419	1.048
2016-10-17	0.672	2.129
2016-10-18	3.68	0.174
2016-10-19	4.256	2.359
2016-10-20	4.991	2.24
2016-10-21	6.688	2.19
2016-10-22	5.804	1.886
2016-10-23	3.684	2.042
2016-10-24	2.195	1.968
2016-10-25	2.118	1.585
2016-10-26	1.536	1.256
2016-10-27	1.229	0.728
2016-10-28	0.98	0.728
2016-10-29	1.104	0.653
2016-10-30	1.132	0.73
2016-10-31	2.121	1.362
2016-11-01	4.084	1.717
2016-11-02	5.055	1.898
2016-11-03	5.824	1.821
2016-11-04	4.479	1.879
2016-11-05	5.584	1.987
2016-11-06	3.588	1.832
2016-11-07	3.303	1.958
2016-11-08	2.272	1.651
2016-11-09	2.089	1.241
2016-11-10	1.953	1.138
2016-11-11	1.788	1.208
2016-11-12	1.76	1.006
2016-11-13	1.78	1.157
2016-11-14	1.405	0.904
2016-11-15	2.395	1.438
2016-11-16	4.111	1.85
2016-11-17	5.223	2.932
2016-11-18	6.188	2.738
2016-11-19	5.648	2.507
2016-11-20	4.05	2.02
2016-11-21	3.341	1.913
2016-11-22	3.467	2.429
2016-11-23	2.174	1.938
2016-11-24	2.098	1.887
2016-11-25	1.758	1.223
2016-11-26	2.082	1.247
2016-11-27	2.105	1.248
2016-11-28	1.118	0.763
2016-11-29	1.525	0.79
2016-11-30	2.939	1.506
2016-12-01	4.147	1.662
2016-12-02	3.315	1.583
2016-12-03	5.065	2.282
2016-12-04	3.298	1.329
2016-12-05	2.403	1.094
2016-12-06	3.414	1.681
2016-12-07	4.002	1.941
2016-12-08	3.374	2.305
2016-12-09	2.654	1.331
2016-12-10	2.177	1.325
2016-12-11	2.54	1.371
2016-12-12	1.884	0.918
2016-12-13	1.197	0.868
2016-12-14	1.426	1.2
2016-12-15	1.991	1.276
2016-12-16	1.652	1.196
2016-12-17	6.528	2.233
2016-12-18	3.909	1.565
2016-12-19	3.56	1.613
2016-12-20	0.66	0.407
2016-12-21	0.862	0.584
2016-12-22	1.04	0.607
2016-12-23	0.631	0.58
2016-12-24	0.779	0.754
2016-12-25	0.854	0.629
2016-12-26	1.352	0.727
2016-12-27	0.828	0.627
2016-12-28	0.753	0.677
2016-12-29	1.431	0.904
2016-12-30	1.988	1.031
2016-12-31	2.046	1.057
[truncated: 1,004 more rows]

## Sheet: w > MMM
Year	Week		IT1	IT2	ST1	ST2	Mean IT	Mean ST	Hotspot IT	Hotspot ST	w > MMM IT	w > MMM ST					Notes
[truncated: 217 more rows]
