# Supplementary material for: Divergent recovery trajectories of intertidal and subtidal coral communities highlight habitat-specific recovery dynamics following bleaching in an extreme macrotidal reef environment
Source: PeerJ. 2023 Sep 15;11:e15987. doi: 10.7717/peerj.15987 (PMC10506583; doi:10.7717/peerj.15987)
Supplement: Supplemental Information 3 [file peerj-11-15987-s003.xlsx]

## Sheet: Read Me
Benthic survey data obtained from 2016 and 2019
Manuscript: "Divergent recovery trajectories of intertidal and subtidal coral communities highlight habitat-specific recovery dynamics following bleaching in an extreme macrotidal reef environment
Authors: Elias Speelman, Michael Parger, Verena Schoepf
Submitted to PeerJ
Type = general benthic category (higher level)
Name = general benthic category (lower level)
e.g. genus name for benthic category hard coral
e.g. sand/rubble for benthic category substrate
Morphology = coral morphology (hard corals only)
Coral health = visual coral health status (hard corals only)
UB = unbleached
M = mildly bleached
S = severely bleached
D = dead
Percent coverage per transect = percent cover of this benthic category in a given transect
Square root = square root transformation of Percent Coverage per transect
Color = CoralHealthChart© colour score for hard corals
Time point = time point when surveys were done
Jan = January 2016
April = April 2016
Okt = October 2016
2019 = October 2019
Life history strategy (LHS) = life history strategy as defined by Darling et al. 2012, Ecology Letters (https://onlinelibrary.wiley.com/doi/abs/10.1111/j.1461-0248.2012.01861.x)
see Methods for how species-specific LHS were applied to genus level
C = competitive
G = generalist
S = stress-tolerant
W = weedy
Corallite integration index score (CIIS) = corallite integration index score as per Swain et al. 2018, Marine Ecology Progress Series 586:1–10. DOI: 10.3354/meps12445
see Methods for separation into low and high CIIS
low = CIIS < 2
high = CIIS >2

## Sheet: Survey data
Image	Type	Name	Coral morphology	Coral health	Percent coverage per transect	Square root	Zone	Transect #	Quadrat #	Color	Time point	Life history strategy	Corallite integration index score
P1140257.JPG	Hard Coral	Acropora	Branching	UB	71	8.42615	Intertidal	1	1	E4	Jan	C	High
P1140257.JPG	Substratum	Sand/Rubble			29	5.38516	Intertidal	1	1		Jan
P1140258.JPG	Hard Coral	Acropora	Branching	UB	16	4	Intertidal	1	2	E4	Jan	C	High
P1140258.JPG	Substratum	Sand/Rubble			84	9.16515	Intertidal	1	2		Jan
P1140259.JPG	Substratum	Sand/Rubble			92	9.59166	Intertidal	1	3		Jan
P1140259.JPG	Soft coral	Soft coral		UB	8	2.82843	Intertidal	1	3	E3	Jan
P1140260.JPG	Substratum	Sand/Rubble			76	8.7178	Intertidal	1	4		Jan
P1140260.JPG	Soft coral	Soft coral			24	4.89898	Intertidal	1	4	E3	Jan
P1140262.JPG	Substratum	Sand/Rubble			100	10	Intertidal	1	5		Jan
P1140263.JPG	Substratum	Sand/Rubble			100	10	Intertidal	1	6		Jan
P1140264.JPG	Substratum	Sand/Rubble			100	10	Intertidal	1	7		Jan
P1140265.JPG	Hard Coral	Acropora	Branching	UB	36	6	Intertidal	1	8	E4	Jan	C	High
P1140265.JPG	Substratum	Sand/Rubble			64	8	Intertidal	1	8		Jan
P1140266.JPG	Hard Coral	Acropora	Branching	UB	80	8.94427	Intertidal	1	9	E5	Jan	C	High
P1140266.JPG	Substratum	Sand/Rubble			20	4.47214	Intertidal	1	9		Jan
P1140267.JPG	Soft coral	Soft coral			6	2.44949	Intertidal	1	10	E5	Jan
P1140267.JPG	Substratum	Sand/Rubble			94	9.69536	Intertidal	1	10		Jan
P1140268.JPG	Substratum	Sand/Rubble			100	10	Intertidal	1	11		Jan
P1140269.JPG	Hard Coral	Acropora	Branching	UB	37	6.08276	Intertidal	1	12	E5	Jan	C	High
P1140269.JPG	Substratum	Sand/Rubble			63	7.93725	Intertidal	1	12		Jan
P1140271.JPG	Hard Coral	Acropora	Branching	UB	39	6.245	Intertidal	1	13	E5	Jan	C	High
P1140271.JPG	Substratum	Sand/Rubble			61	7.81025	Intertidal	1	13		Jan
P1140272.JPG	Hard Coral	Acropora	Branching	UB	33	5.74456	Intertidal	1	15	E5	Jan	C	High
P1140272.JPG	Substratum	Sand/Rubble			67	8.18535	Intertidal	1	15		Jan
P1140273.JPG	Hard Coral	Acropora	Branching	UB	18	4.24264	Intertidal	1	16	E5	Jan	C	High
P1140273.JPG	Substratum	Sand/Rubble			82	9.05539	Intertidal	1	16		Jan
P1140275.JPG	Hard Coral	Acropora	Branching	UB	41	6.40312	Intertidal	1	17	E5	Jan	C	High
P1140275.JPG	Substratum	Sand/Rubble			59	7.68115	Intertidal	1	17		Jan
P1140276.JPG	Hard Coral	Acropora	Branching	UB	16	4	Intertidal	1	18	E5	Jan	C	High
P1140276.JPG	Substratum	Sand/Rubble			84	9.16515	Intertidal	1	18		Jan
P1140277.JPG	Hard Coral	Acropora	Branching	UB	29	5.38516	Intertidal	1	19	E5	Jan	C	High
P1140277.JPG	Substratum	Sand/Rubble			71	8.42615	Intertidal	1	19		Jan
P1140278.JPG	Hard Coral	Acropora	Branching	UB	4	2	Intertidal	1	20	E5	Jan	C	High
P1140278.JPG	Substratum	Sand/Rubble			96	9.79796	Intertidal	1	20		Jan
P1140279.JPG	Hard Coral	Acropora	Branching	UB	27	5.19615	Intertidal	1	20	E5	Jan	C	High
P1140279.JPG	Substratum	Sand/Rubble			73	8.544	Intertidal	1	20		Jan
NA	Substratum	Sand/Rubble			100	10	Intertidal	1	21		Jan
P1140280.JPG	Substratum	Sand/Rubble			100	10	Intertidal	1	22		Jan
P1140281.JPG	Substratum	Sand/Rubble			100	10	Intertidal	1	23		Jan
P1140282.JPG	Substratum	Sand/Rubble			100	10	Intertidal	1	24		Jan
P1140284.JPG	Substratum	Sand/Rubble			100	10	Intertidal	1	25		Jan
P1140286.JPG	Hard Coral	Acropora	Branching	UB	10	3.16228	Intertidal	1	26	E5	Jan	C	High
P1140286.JPG	Substratum	Sand/Rubble			90	9.48683	Intertidal	1	26		Jan
P1140288.JPG	Hard Coral	Acropora	Branching	UB	4	2	Intertidal	1	27	E5	Jan	C	High
P1140288.JPG	Substratum	Sand/Rubble			96	9.79796	Intertidal	1	27		Jan
P1140289.JPG	Substratum	Sand/Rubble			100	10	Intertidal	1	28		Jan
P1140290.JPG	Hard Coral	Acropora	Branching	S	6	2.44949	Intertidal	1	29	E1	Jan	C	High
P1140290.JPG	Seaweed	Red seaweed			8	2.82843	Intertidal	1	29		Jan
P1140290.JPG	Substratum	Sand/Rubble			86	9.27362	Intertidal	1	29		Jan
P1140303.JPG	Hard Coral	Acropora	Branching	UB	73	8.544	Intertidal	2	1	E4	Jan	C	High
P1140303.JPG	Substratum	Sand/Rubble			27	5.19615	Intertidal	2	1		Jan
P1140304.JPG	Hard Coral	Acropora	Branching	UB	52	7.2111	Intertidal	2	2	E4	Jan	C	High
P1140304.JPG	Substratum	Sand/Rubble			48	6.9282	Intertidal	2	2		Jan
P1140305.JPG	Hard Coral	Acropora	Branching	UB	49	7	Intertidal	2	3	E4	Jan	C	High
P1140305.JPG	Substratum	Sand/Rubble			51	7.14143	Intertidal	2	3		Jan
P1140306.JPG	Hard Coral	Acropora	Branching	UB	60	7.74597	Intertidal	2	4	E4	Jan	C	High
P1140306.JPG	Substratum	Sand/Rubble			40	6.32456	Intertidal	2	4		Jan
P1140307.JPG	Hard Coral	Acropora	Branching	UB	78	8.83176	Intertidal	2	5	E4	Jan	C	High
P1140307.JPG	Substratum	Sand/Rubble			22	4.69042	Intertidal	2	5		Jan
P1140308.JPG	Hard Coral	Acropora	Branching	UB	86	9.27362	Intertidal	2	6	E4	Jan	C	High
P1140308.JPG	Substratum	Sand/Rubble			14	3.74166	Intertidal	2	6		Jan
P1140309.JPG	Hard Coral	Acropora	Branching	UB	11	3.31662	Intertidal	2	7	E4	Jan	C	High
P1140309.JPG	Substratum	Sand/Rubble			89	9.43398	Intertidal	2	7		Jan
P1140311.JPG	Hard Coral	Acropora	Branching	UB	59	7.68115	Intertidal	2	8	E4	Jan	C	High
P1140311.JPG	Substratum	Sand/Rubble			41	6.40312	Intertidal	2	8		Jan
P1140312.JPG	Hard Coral	Acropora	Branching	UB	19	4.3589	Intertidal	2	9	E4	Jan	C	High
P1140312.JPG	Substratum	Sand/Rubble			81	9	Intertidal	2	9		Jan
P1140313.JPG	Seaweed	Green seaweed			3	1.73205	Intertidal	2	10		Jan
P1140313.JPG	Substratum	Sand/Rubble			97	9.84886	Intertidal	2	10		Jan
P1140314.JPG	Hard Coral	Acropora	Branching	UB	36	6	Intertidal	2	11	E4	Jan	C	High
P1140314.JPG	Seaweed	Green seaweed			19	4.3589	Intertidal	2	11		Jan
P1140314.JPG	Seaweed	Red seaweed			9	3	Intertidal	2	11		Jan
P1140314.JPG	Substratum	Sand/Rubble			36	6	Intertidal	2	11		Jan
P1140315.JPG	Hard Coral	Acropora	Branching	UB	85	9.21954	Intertidal	2	12	E4	Jan	C	High
P1140315.JPG	Seaweed	Green seaweed			4	2	Intertidal	2	12		Jan
P1140315.JPG	Substratum	Sand/Rubble			11	3.31662	Intertidal	2	12		Jan
P1140316.JPG	Hard Coral	Acropora	Branching	UB	51	7.14143	Intertidal	2	13	E4	Jan	C	High
P1140316.JPG	Substratum	Sand/Rubble			49	7	Intertidal	2	13		Jan
P1140317.JPG	Hard Coral	Acropora	Branching	UB	8	2.82843	Intertidal	2	14	E4	Jan	C	High
P1140317.JPG	Substratum	Sand/Rubble			92	9.59166	Intertidal	2	14		Jan
P1140321.JPG	Hard Coral	Acropora	Branching	UB	60	7.74597	Intertidal	2	15	E4	Jan	C	High
P1140321.JPG	Substratum	Sand/Rubble			40	6.32456	Intertidal	2	15		Jan
P1140323.JPG	Hard Coral	Acropora	Branching	UB	6	2.44949	Intertidal	2	16	E4	Jan	C	High
P1140323.JPG	Substratum	Sand/Rubble			94	9.69536	Intertidal	2	16		Jan
P1140324.JPG	Hard Coral	Acropora	Branching	UB	12	3.4641	Intertidal	2	17	E4	Jan	C	High
P1140324.JPG	Substratum	Sand/Rubble			88	9.38083	Intertidal	2	17		Jan
P1140326.JPG	Substratum	Sand/Rubble			100	10	Intertidal	2	18		Jan
P1140327.JPG	Substratum	Sand/Rubble			100	10	Intertidal	2	19		Jan
P1140329.JPG	Substratum	Sand/Rubble			100	10	Intertidal	2	20		Jan
P1140330.JPG	Substratum	Sand/Rubble			100	10	Intertidal	2	21		Jan
P1140332.JPG	Substratum	Sand/Rubble			100	10	Intertidal	2	22		Jan
P1140334.JPG	Substratum	Sand/Rubble			100	10	Intertidal	2	23		Jan
P1140335.JPG	Substratum	Sand/Rubble			100	10	Intertidal	2	24		Jan
P1140336.JPG	Substratum	Sand/Rubble			100	10	Intertidal	2	25		Jan
P1140337.JPG	Substratum	Sand/Rubble			100	10	Intertidal	2	26		Jan
P1140341.JPG	Hard Coral	Stylophora	Branching	UB	7	2.64575	Intertidal	2	27	E4	Jan	W	Low
P1140341.JPG	Substratum	Sand/Rubble			93	9.64365	Intertidal	2	27		Jan
P1140342.JPG	Hard Coral	Stylophora	Branching	UB	38	6.16441	Intertidal	2	28	E4	Jan	W	Low
P1140342.JPG	Substratum	Sand/Rubble			62	7.87401	Intertidal	2	28		Jan
P1140344.JPG	Substratum	Sand/Rubble			62	7.87401	Intertidal	2	29		Jan
IMG_0777.JPG	Substratum	Sand/Rubble			100	10	Intertidal	3	1		Jan
IMG_0778.JPG	Soft coral	Soft coral			5	2.23607	Intertidal	3	2		Jan
IMG_0778.JPG	Substratum	Sand/Rubble			95	9.74679	Intertidal	3	2		Jan
IMG_0779.JPG	Hard Coral	Acropora	Branching	UB	2	1.41421	Intertidal	3	3	E5	Jan	C	High
IMG_0779.JPG	Hard Coral	Unknown	Massive	UB	4	2	Intertidal	3	3	E4	Jan
IMG_0779.JPG	Substratum	Sand/Rubble			94	9.69536	Intertidal	3	3		Jan
IMG_0780.JPG	Hard Coral	Acropora	Branching	UB	48	6.9282	Intertidal	3	4	E5	Jan	C	High
IMG_0780.JPG	Substratum	Sand/Rubble			52	7.2111	Intertidal	3	4		Jan
IMG_0781.JPG	Hard Coral	Acropora	Branching	UB	84	9.16515	Intertidal	3	5	E5	Jan	C	High
IMG_0781.JPG	Substratum	Sand/Rubble			16	4	Intertidal	3	5		Jan
Q6.png	Hard Coral	Acropora	Branching	UB	95	9.74679	Intertidal	3	6	E5	Jan	C	High
Q6.png	Substratum	Sand/Rubble			5	2.23607	Intertidal	3	6		Jan
Q7.png	Hard Coral	Acropora	Branching	UB	23	4.79583	Intertidal	3	7	E4	Jan	C	High
Q7.png	Substratum	Sand/Rubble			77	8.77496	Intertidal	3	7		Jan
IMG_0786.JPG	Hard Coral	Acropora	Branching	UB	14	3.74166	Intertidal	3	8	E4	Jan	C	High
IMG_0786.JPG	Substratum	Sand/Rubble			86	9.27362	Intertidal	3	8		Jan
IMG_0787.JPG	Hard Coral	Acropora	Branching	UB	31	5.56776	Intertidal	3	9	E4	Jan	C	High
IMG_0787.JPG	Substratum	Sand/Rubble			69	8.30662	Intertidal	3	9		Jan
IMG_0788.JPG	Hard Coral	Acropora	Branching	UB	63	7.93725	Intertidal	3	10	E4	Jan	C	High
IMG_0788.JPG	Substratum	Sand/Rubble			37	6.08276	Intertidal	3	10		Jan
IMG_0789.JPG	Hard Coral	Acropora	Branching	UB	37	6.08276	Intertidal	3	11	E5	Jan	C	High
IMG_0789.JPG	Hard Coral	Platygyra	Encrusting	UB	4	2	Intertidal	3	11	E4	Jan	St	High
IMG_0789.JPG	Substratum	Sand/Rubble			59	7.68115	Intertidal	3	11		Jan
Q12.png	Hard Coral	Acropora	Branching	UB	7	2.64575	Intertidal	3	12	E4	Jan	C	High
Q12.png	Hard Coral	Acropora	Branching	UB	18	4.24264	Intertidal	3	12	E4	Jan	C	High
Q12.png	Hard Coral	Porites	Massive	UB	23	4.79583	Intertidal	3	12	C3	Jan		High
Q12.png	Substratum	Sand/Rubble			52	7.2111	Intertidal	3	12		Jan
Q13.png	Hard Coral	Acropora	Branching	UB	18	4.24264	Intertidal	3	13	E4	Jan	C	High
Q13.png	Hard Coral	Acropora	Branching	M	14	3.74166	Intertidal	3	13	E4	Jan	C	High
Q13.png	Hard Coral	Unknown	Massive	UB	4	2	Intertidal	3	13	C5	Jan
Q13.png	Soft coral	Soft coral			10	3.16228	Intertidal	3	13		Jan
Q13.png	Substratum	Sand/Rubble			54	7.34847	Intertidal	3	13		Jan
Q14.png	Hard Coral	Acropora	Branching	UB	39	6.245	Intertidal	3	14	E5	Jan	C	High
Q14.png	Hard Coral	Acropora	Branching	UB	15	3.87298	Intertidal	3	14	E5	Jan	C	High
Q14.png	Hard Coral	Favites	Branching	UB	3	1.73205	Intertidal	3	14	E5	Jan	St	High
Q14.png	Hard Coral	Porites	Massive	UB	5	2.23607	Intertidal	3	14	E3	Jan		High
Q14.png	Substratum	Sand/Rubble			38	6.16441	Intertidal	3	14		Jan
Q15.png	Hard Coral	Acropora	Branching	UB	29	5.38516	Intertidal	3	15	E4	Jan	C	High
Q15.png	Soft coral	Soft coral			5	2.23607	Intertidal	3	15		Jan
Q15.png	Substratum	Sand/Rubble			66	8.12404	Intertidal	3	15		Jan
IMG_0798.JPG	Hard Coral	Acropora	Branching	UB	77	8.77496	Intertidal	3	16	E4	Jan	C	High
IMG_0798.JPG	Substratum	Sand/Rubble			23	4.79583	Intertidal	3	16		Jan
IMG_0799.JPG	Hard Coral	Acropora	Branching	UB	15	3.87298	Intertidal	3	17	E5	Jan	C	High
IMG_0799.JPG	Hard Coral	Unknown	Massive	UB	2	1.41421	Intertidal	3	17	E4	Jan
IMG_0799.JPG	Soft coral	Soft coral			21	4.58258	Intertidal	3	17		Jan
IMG_0799.JPG	Seaweed	Green seaweed			10	3.16228	Intertidal	3	17		Jan
IMG_0799.JPG	Substratum	Sand/Rubble			52	7.2111	Intertidal	3	17		Jan
IMG_0800.JPG	Hard Coral	Unknown	Massive	UB	7	2.64575	Intertidal	3	18	E4	Jan
IMG_0800.JPG	Soft coral	Soft coral			9	3	Intertidal	3	18		Jan
IMG_0800.JPG	Substratum	Sand/Rubble			84	9.16515	Intertidal	3	18		Jan
IMG_0802.JPG	Soft coral	Soft coral			2	1.41421	Intertidal	3	19		Jan
IMG_0802.JPG	Substratum	Sand/Rubble			98	9.89949	Intertidal	3	19		Jan
IMG_0803.JPG	Soft coral	Soft coral			7	2.64575	Intertidal	3	20		Jan
IMG_0803.JPG	Seaweed	Brown seaweed			1	1	Intertidal	3	20		Jan
IMG_0803.JPG	Substratum	Sand/Rubble			92	9.59166	Intertidal	3	20		Jan
IMG_0804.JPG	Soft coral	Soft coral			13	3.60555	Intertidal	3	21		Jan
IMG_0804.JPG	Substratum	Sand/Rubble			87	9.32738	Intertidal	3	21		Jan
IMG_0805.JPG	Substratum	Sand/Rubble			100	10	Intertidal	3	22		Jan
Q23.png	Hard Coral	Acropora	Branching	UB	29	5.38516	Intertidal	3	23	E4	Jan	C	High
Q23.png	Substratum	Sand/Rubble			71	8.42615	Intertidal	3	23		Jan
Q24.png	Hard Coral	Acropora	Branching	UB	90	9.48683	Intertidal	3	24	E5	Jan	C	High
Q24.png	Substratum	Sand/Rubble			10	3.16228	Intertidal	3	24		Jan
Q25.png	Hard Coral	Acropora	Branching	UB	82	9.05539	Intertidal	3	25	E4	Jan	C	High
Q25.png	Substratum	Sand/Rubble			18	4.24264	Intertidal	3	25		Jan
Q26.png	Hard Coral	Acropora	Branching	UB	43	6.55744	Intertidal	3	26	E4	Jan	C	High
Q26.png	Substratum	Sand/Rubble			57	7.54983	Intertidal	3	26		Jan
Q27.png	Hard Coral	Acropora	Branching	UB	31	5.56776	Intertidal	3	27	E4	Jan	C	High
Q27.png	Substratum	Sand/Rubble			69	8.30662	Intertidal	3	27		Jan
Q28.png	Soft coral	Soft coral			5	2.23607	Intertidal	3	28		Jan
Q28.png	Substratum	Sand/Rubble			95	9.74679	Intertidal	3	28		Jan
Q29.png	Soft coral	Soft coral			10	3.16228	Intertidal	3	29		Jan
Q29.png	Seaweed	Brown seaweed			7	2.64575	Intertidal	3	29		Jan
Q29.png	Substratum	Sand/Rubble			83	9.11043	Intertidal	3	29		Jan
Q30.png	Hard Coral	Favites	Encrusting	S	3	1.73205	Intertidal	3	30	E2	Jan	St	High
Q30.png	Soft coral	Soft coral			10	3.16228	Intertidal	3	30		Jan
Q30.png	Seaweed	Brown seaweed			5	2.23607	Intertidal	3	30		Jan
Q30.png	Substratum	Sand/Rubble			80	8.94427	Intertidal	3	30		Jan
Q30.png	Soft coral	Soft coral		M	2	1.41421	Intertidal	3	30	E3	Jan
Q1.png	Hard Coral	Stylophora	Branching	S	7	2.64575	Intertidal	4	1	E2	Jan	W	Low
Q1.png	Hard Coral	Favites	Encrusting	UB	2	1.41421	Intertidal	4	1	E5	Jan	St	High
Q1.png	Hard Coral	Montastrea	Encrusting	UB	3	1.73205	Intertidal	4	1	NA	Jan	St
Q1.png	Hard Coral	Acropora	Branching	UB	4	2	Intertidal	4	1	E5	Jan	C	High
Q1.png	Soft coral	Soft coral			16	4	Intertidal	4	1		Jan
Q1.png	Seaweed	Brown seaweed			2	1.41421	Intertidal	4	1		Jan
Q1.png	Substratum	Rock			66	8.12404	Intertidal	4	1		Jan
Q2.png	Hard Coral	Favites	Massive	UB	1	1	Intertidal	4	2	E5	Jan	St	High
Q2.png	Substratum	Sand/Rubble			95	9.74679	Intertidal	4	2		Jan
Q2.png	Hard Coral	Unknown	Encrusting	UB	4	2	Intertidal	4	2	NA	Jan
Q3.png	Hard Coral	Dipsastraea	Encrusting	UB	4	2	Intertidal	4	3	E4	Jan	St	Low
Q3.png	Hard Coral	Platygyra	Encrusting	UB	2	1.41421	Intertidal	4	3	E4	Jan	St	High
Q3.png	Soft coral	Soft coral			1	1	Intertidal	4	3		Jan
Q3.png	Seaweed	Green seaweed			6	2.44949	Intertidal	4	3		Jan
Q3.png	Seaweed	Brown seaweed			17	4.12311	Intertidal	4	3		Jan
Q3.png	Substratum	Sand/Rubble			70	8.3666	Intertidal	4	3		Jan
Q4.png	Hard Coral	Unknown	Encrusting	S	1	1	Intertidal	4	4	E1	Jan
Q4.png	Seaweed	Green seaweed			1	1	Intertidal	4	4		Jan
Q4.png	Seaweed	Brown seaweed			31	5.56776	Intertidal	4	4		Jan
Q4.png	Substratum	Sand/Rubble			67	8.18535	Intertidal	4	4		Jan
Q5.png	Hard Coral	Platygyra	Encrusting	UB	4	2	Intertidal	4	5	E5	Jan	St	High
Q5.png	Soft coral	Soft coral			5	2.23607	Intertidal	4	5		Jan
Q5.png	Seaweed	Brown seaweed			3	1.73205	Intertidal	4	5		Jan
Q5.png	Substratum	Sand/Rubble			88	9.38083	Intertidal	4	5		Jan
Q6.png	Hard Coral	Millepora	Branching	UB	36	6	Intertidal	4	6	E5	Jan
Q6.png	Soft coral	Soft coral			4	2	Intertidal	4	6		Jan
Q6.png	Substratum	Sand/Rubble			60	7.74597	Intertidal	4	6		Jan
Q7.png	Hard Coral	Montipora	Encrusting	UB	21	4.58258	Intertidal	4	7	NA	Jan		Low
Q7.png	Hard Coral	Millepora	Branching	UB	11	3.31662	Intertidal	4	7	E5	Jan
Q7.png	Soft coral	Soft coral			4	2	Intertidal	4	7		Jan
Q7.png	Substratum	Sand/Rubble			64	8	Intertidal	4	7		Jan
Q8.png	Hard Coral	Acropora	Branching	UB	2	1.41421	Intertidal	4	8	E5	Jan	C	High
Q8.png	Hard Coral	Unknown	Encrusting	UB	8	2.82843	Intertidal	4	8	D5	Jan
Q8.png	Substratum	Sand/Rubble			90	9.48683	Intertidal	4	8		Jan
Q9.png	Hard Coral	Favites	Encrusting	UB	1	1	Intertidal	4	9	E6	Jan	St	High
Q9.png	Hard Coral	Porites	Massive	UB	32	5.65685	Intertidal	4	9	E4	Jan		High
Q9.png	Hard Coral	Unknown	Encrusting	UB	4	2	Intertidal	4	9	D5	Jan
Q9.png	Seaweed	Brown seaweed			4	2	Intertidal	4	9		Jan
Q9.png	Substratum	Sand/Rubble			59	7.68115	Intertidal	4	9		Jan
Q10.png	Hard Coral	Porites	Massive	UB	22	4.69042	Intertidal	4	10	E4	Jan		High
Q10.png	Hard Coral	Platygyra	Encrusting	UB	3	1.73205	Intertidal	4	10	E5	Jan	St	High
Q10.png	Hard Coral	Unknown	Encrusting	UB	5	2.23607	Intertidal	4	10	D5	Jan
Q10.png	Hard Coral	Unknown	Encrusting	UB	2	1.41421	Intertidal	4	10	E5	Jan
Q10.png	Hard Coral	Unknown	Encrusting	UB	7	2.64575	Intertidal	4	10	E4	Jan
Q10.png	Seaweed	Brown seaweed			4	2	Intertidal	4	10		Jan
Q10.png	Substratum	Sand/Rubble			57	7.54983	Intertidal	4	10		Jan
Q11.png	Hard Coral	Favites	Encrusting	UB	2	1.41421	Intertidal	4	11	E4	Jan	St	High
Q11.png	Hard Coral	Unknown	Encrusting	UB	4	2	Intertidal	4	11	D5	Jan
Q11.png	Soft coral	Soft coral			3	1.73205	Intertidal	4	11		Jan
Q11.png	Seaweed	Green seaweed			3	1.73205	Intertidal	4	11		Jan
Q11.png	Seaweed	Brown seaweed			13	3.60555	Intertidal	4	11		Jan
Q11.png	Substratum	Sand/Rubble			75	8.66025	Intertidal	4	11		Jan
Q12.png	Hard Coral	Favites	Encrusting	S	1	1	Intertidal	4	12	E1	Jan	St	High
Q12.png	Hard Coral	Platygyra	Encrusting	UB	1	1	Intertidal	4	12	E5	Jan	St	High
Q12.png	Hard Coral	Unknown	Encrusting	UB	6	2.44949	Intertidal	4	12	D4	Jan
Q12.png	Soft coral	Soft coral			3	1.73205	Intertidal	4	12		Jan
Q12.png	Seaweed	Brown seaweed			9	3	Intertidal	4	12		Jan
Q12.png	Substratum	Sand/Rubble			80	8.94427	Intertidal	4	12		Jan
Q13.png	Hard Coral	Acropora	Branching	UB	18	4.24264	Intertidal	4	13	E4	Jan	C	High
Q13.png	Hard Coral	Porites	Massive	UB	1	1	Intertidal	4	13	NA	Jan		High
Q13.png	Soft coral	Soft coral			1	1	Intertidal	4	13		Jan
Q13.png	Seaweed	Green seaweed			1	1	Intertidal	4	13		Jan
Q13.png	Seaweed	Brown seaweed			2	1.41421	Intertidal	4	13		Jan
Q13.png	Substratum	Sand/Rubble			77	8.77496	Intertidal	4	13		Jan
Q14.png	Hard Coral	Acropora	Branching	UB	23	4.79583	Intertidal	4	14	E4	Jan	C	High
Q14.png	Hard Coral	Montipora	Encrusting	UB	5	2.23607	Intertidal	4	14	NA	Jan		Low
Q14.png	Hard Coral	Porites	Massive	UB	2	1.41421	Intertidal	4	14	E4	Jan		High
Q14.png	Substratum	Sand/Rubble			70	8.3666	Intertidal	4	14		Jan
Q15.png	Hard Coral	Acropora	Branching	UB	10	3.16228	Intertidal	4	15	E4	Jan	C	High
Q15.png	Hard Coral	Montipora	Encrusting	UB	20	4.47214	Intertidal	4	15	NA	Jan		Low
Q15.png	Hard Coral	Porites	Massive	UB	4	2	Intertidal	4	15	NA	Jan		High
Q15.png	Seaweed	Brown seaweed			1	1	Intertidal	4	15		Jan
Q15.png	Substratum	Sand/Rubble			65	8.06226	Intertidal	4	15		Jan
Q16.png	Hard Coral	Acropora	Branching	UB	2	1.41421	Intertidal	4	16	E4	Jan	C	High
Q16.png	Hard Coral	Porites	Encrusting	UB	3	1.73205	Intertidal	4	16	E4	Jan		High
Q16.png	Hard Coral	Unknown	Encrusting	S	1	1	Intertidal	4	16	E1	Jan
Q16.png	Substratum	Sand/Rubble			94	9.69536	Intertidal	4	16		Jan
Q17.png	Hard Coral	Montipora	Encrusting	UB	2	1.41421	Intertidal	4	17	NA	Jan		Low
Q17.png	Seaweed	Brown seaweed			11	3.31662	Intertidal	4	17		Jan
Q17.png	Substratum	Sand/Rubble			87	9.32738	Intertidal	4	17		Jan
Q18.JPG	Hard Coral	Acropora	Branching	D	17	4.12311	Intertidal	4	18	Turf	Jan	C	High
Q18.JPG	Soft coral	Soft coral			1	1	Intertidal	4	18		Jan
Q18.JPG	Substratum	Sand/Rubble			82	9.05539	Intertidal	4	18		Jan
Q19.JPG	Hard Coral	Acropora	Branching	D	84	9.16515	Intertidal	4	19	Turf	Jan	C	High
Q19.JPG	Substratum	Sand/Rubble			16	4	Intertidal	4	19		Jan
Q20.JPG	Hard Coral	Acropora	Branching	D	74	8.60233	Intertidal	4	20	Turf	Jan	C	High
Q20.JPG	Substratum	Sand/Rubble			26	5.09902	Intertidal	4	20		Jan
Q21.JPG	Seaweed	Brown seaweed			11	3.31662	Intertidal	4	21		Jan
Q21.JPG	Substratum	Sand/Rubble			89	9.43398	Intertidal	4	21		Jan
Q22.JPG	Substratum	Sand/Rubble			100	10	Intertidal	4	22		Jan
Q23.JPG	Hard Coral	Acropora	Branching	UB	2	1.41421	Intertidal	4	23	E4	Jan	C	High
Q23.JPG	Soft coral	Soft coral		UB	4	2	Intertidal	4	23	E4	Jan
Q23.JPG	Substratum	Sand/Rubble			94	9.69536	Intertidal	4	23		Jan
Q24.JPG	Hard Coral	Acropora	Branching	M	1	1	Intertidal	4	24	E4	Jan	C	High
Q24.JPG	Hard Coral	Porites	Massive	UB	5	2.23607	Intertidal	4	24	E6	Jan		High
Q24.JPG	Substratum	Sand/Rubble			94	9.69536	Intertidal	4	24		Jan
Q25.JPG	Hard Coral	Turbinaria	Plating	UB	16	4	Intertidal	4	25	NA	Jan		Low
Q25.JPG	Hard Coral	Acropora	Branching	UB	8	2.82843	Intertidal	4	25	E6	Jan	C	High
Q25.JPG	Substratum	Sand/Rubble			59	7.68115	Intertidal	4	25		Jan
Q25.JPG	Hard Coral	Porites	Massive	UB	17	4.12311	Intertidal	4	25	E4	Jan		High
Q26.JPG	Substratum	Sand/Rubble			100	10	Intertidal	4	26		Jan
Q27.JPG	Substratum	Sand/Rubble			100	10	Intertidal	4	27		Jan
Q28.JPG	Substratum	Sand/Rubble			100	10	Intertidal	4	28		Jan
Q29.JPG	Substratum	Sand/Rubble			26	5.09902	Intertidal	4	29		Jan
Q29.JPG	Hard Coral	Acropora	Branching	UB	74	8.60233	Intertidal	4	29	E5	Jan	C	High
Q30.JPG	Hard Coral	Acropora	Plating	S	27	5.19615	Intertidal	4	30	E3	Jan	C	High
Q30.JPG	Substratum	Sand/Rubble			73	8.544	Intertidal	4	30		Jan
Shell 1a.JPG	Hard Coral	Acropora	Branching	UB	35	5.91608	Intertidal	5	1	E4	Jan	C	High
Shell 1a.JPG	Hard Coral	Porites	Massive	UB	1	1	Intertidal	5	1	E4	Jan		High
Shell 1a.JPG	Substratum	Sand/Rubble			64	8	Intertidal	5	1		Jan
Shell 1aa.JPG	Substratum	Sand/Rubble			100	10	Intertidal	5	2		Jan
Shell 1c.JPG	Hard Coral	Favites	Encrusting	UB	2	1.41421	Intertidal	5	3	E4	Jan	St	High
Shell 1c.JPG	Hard Coral	Porites	Massive	UB	9	3	Intertidal	5	3	NA	Jan		High
Shell 1c.JPG	Soft coral	Soft coral			1	1	Intertidal	5	3		Jan
Shell 1c.JPG	Seaweed	Green seaweed			9	3	Intertidal	5	3		Jan
Shell 1c.JPG	Substratum	Rock			26	5.09902	Intertidal	5	3		Jan
Shell 1c.JPG	Substratum	Sand/Rubble			53	7.28011	Intertidal	5	3		Jan
Shell 1e.JPG	Hard Coral	Acropora	Branching	UB	9	3	Intertidal	5	4	D6	Jan	C	High
Shell 1e.JPG	Seaweed	Brown seaweed			6	2.44949	Intertidal	5	4		Jan
Shell 1e.JPG	Substratum	Rock			7	2.64575	Intertidal	5	4		Jan
Shell 1e.JPG	Substratum	Sand/Rubble			78	8.83176	Intertidal	5	4		Jan
Shell 1f.JPG	Seaweed	Green seaweed			6	2.44949	Intertidal	5	5		Jan
Shell 1f.JPG	Substratum	Rock			27	5.19615	Intertidal	5	5		Jan
Shell 1f.JPG	Substratum	Sand/Rubble			67	8.18535	Intertidal	5	5		Jan
Shell 1g.JPG	Substratum	Sand/Rubble			100	10	Intertidal	5	6		Jan
Shell 1h.JPG	Substratum	Sand/Rubble			100	10	Intertidal	5	7		Jan
Shell 1i.JPG	Seaweed	Brown seaweed			5	2.23607	Intertidal	5	8		Jan
Shell 1i.JPG	Substratum	Sand/Rubble			95	9.74679	Intertidal	5	8		Jan
Shell 1j.JPG	Hard Coral	Acropora	Branching	UB	7	2.64575	Intertidal	5	9	E5	Jan	C	High
Shell 1j.JPG	Substratum	Sand/Rubble			93	9.64365	Intertidal	5	9		Jan
Shell 1k.JPG	Hard Coral	Acropora	Branching	UB	10	3.16228	Intertidal	5	10	E6	Jan	C	High
Shell 1k.JPG	Hard Coral	Porites	Massive	UB	5	2.23607	Intertidal	5	10	E4	Jan		High
Shell 1k.JPG	Soft coral	Soft coral			2	1.41421	Intertidal	5	10		Jan
Shell 1k.JPG	Substratum	Rock			15	3.87298	Intertidal	5	10		Jan
Shell 1k.JPG	Substratum	Sand/Rubble			68	8.24621	Intertidal	5	10		Jan
Shell 1l.JPG	Hard Coral	Acropora	Branching	UB	20	4.47214	Intertidal	5	11	E6	Jan	C	High
Shell 1l.JPG	Substratum	Sand/Rubble			80	8.94427	Intertidal	5	11		Jan
Shell 1m.JPG	Hard Coral	Acropora	Branching	UB	1	1	Intertidal	5	12	E5	Jan	C	High
Shell 1m.JPG	Seaweed	Green seaweed			7	2.64575	Intertidal	5	12		Jan
Shell 1m.JPG	Seaweed	Brown seaweed			2	1.41421	Intertidal	5	12		Jan
Shell 1m.JPG	Substratum	Sand/Rubble			90	9.48683	Intertidal	5	12		Jan
Shell 1n.JPG	Soft coral	Soft coral			1	1	Intertidal	5	13		Jan
Shell 1n.JPG	Seaweed	Brown seaweed			1	1	Intertidal	5	13		Jan
Shell 1n.JPG	Substratum	Sand/Rubble			98	9.89949	Intertidal	5	13		Jan
Shell 1o.JPG	Hard Coral	Acropora	Branching	UB	2	1.41421	Intertidal	5	14	E5	Jan	C	High
Shell 1o.JPG	Hard Coral	Dipsastraea	Massive	UB	1	1	Intertidal	5	14	E5	Jan	St	Low
Shell 1o.JPG	Seaweed	Green seaweed			2	1.41421	Intertidal	5	14		Jan
Shell 1o.JPG	Substratum	Sand/Rubble			95	9.74679	Intertidal	5	14		Jan
Shell 1p.JPG	Seaweed	Green seaweed			9	3	Intertidal	5	15		Jan
Shell 1p.JPG	Substratum	Sand/Rubble			91	9.53939	Intertidal	5	15		Jan
Shell 1q.JPG	Hard Coral	Trachyphyllia	Massive	M	1	1	Intertidal	5	16	E3	Jan
Shell 1q.JPG	Hard Coral	Montastrea	Massive	UB	3	1.73205	Intertidal	5	16	E4	Jan	St
Shell 1q.JPG	Seaweed	Green seaweed			2	1.41421	Intertidal	5	16		Jan
Shell 1q.JPG	Seaweed	Brown seaweed			2	1.41421	Intertidal	5	16		Jan
Shell 1q.JPG	Substratum	Sand/Rubble			92	9.59166	Intertidal	5	16		Jan
Shell 1r.JPG	Substratum	Sand/Rubble			100	10	Intertidal	5	16		Jan
Shell 1s.JPG	Hard Coral	Trachyphyllia	Massive	M	2	1.41421	Intertidal	5	17	E3	Jan
Shell 1s.JPG	Soft coral	Soft coral			2	1.41421	Intertidal	5	17		Jan
Shell 1s.JPG	Seaweed	Green seaweed			3	1.73205	Intertidal	5	17		Jan
Shell 1s.JPG	Seaweed	Brown seaweed			6	2.44949	Intertidal	5	17		Jan
Shell 1s.JPG	Substratum	Sand/Rubble			87	9.32738	Intertidal	5	17		Jan
Shell 1t.JPG	Hard Coral	Acropora	Branching	UB	3	1.73205	Intertidal	5	18	E6	Jan	C	High
Shell 1t.JPG	Seaweed	Green seaweed			4	2	Intertidal	5	18		Jan
Shell 1t.JPG	Seaweed	Brown seaweed			15	3.87298	Intertidal	5	18		Jan
Shell 1t.JPG	Substratum	Sand/Rubble			78	8.83176	Intertidal	5	18		Jan
Shell 1v.JPG	Hard Coral	Acropora	Branching	UB	14	3.74166	Intertidal	5	19	E6	Jan	C	High
Shell 1v.JPG	Soft coral	Soft coral			2	1.41421	Intertidal	5	19		Jan
Shell 1v.JPG	Substratum	Sand/Rubble			84	9.16515	Intertidal	5	19		Jan
Shell 1w.JPG	Hard Coral	Pavona	Massive	UB	4	2	Intertidal	5	23	E4	Jan		High
Shell 1w.JPG	Substratum	Sand/Rubble			96	9.79796	Intertidal	5	23		Jan
Shell 1x.JPG	Hard Coral	Goniopora	Massive	UB	6	2.44949	Intertidal	5	20	NA	Jan
Shell 1x.JPG	Hard Coral	Pavona	Massive	UB	1	1	Intertidal	5	20	E4	Jan		High
Shell 1x.JPG	Substratum	Sand/Rubble			93	9.64365	Intertidal	5	20		Jan
Shell 1y.JPG	Soft coral	Soft coral			2	1.41421	Intertidal	5	21		Jan
Shell 1y.JPG	Seaweed	Brown seaweed			9	3	Intertidal	5	21		Jan
Shell 1y.JPG	Substratum	Sand/Rubble			89	9.43398	Intertidal	5	21		Jan
Shell 1z.JPG	Hard Coral	Acropora	Branching	UB	3	1.73205	Intertidal	5	22	E5	Jan	C	High
Shell 1z.JPG	Hard Coral	Porites	Massive	S	3	1.73205	Intertidal	5	22	NA	Jan		High
Shell 1z.JPG	Hard Coral	Unknown	Encrusting	UB	5	2.23607	Intertidal	5	22	D4	Jan
Shell 1z.JPG	Substratum	Sand/Rubble			89	9.43398	Intertidal	5	22		Jan
Shell 2a.JPG	Hard Coral	Acropora	Branching	UB	35	5.91608	Intertidal	6	1	E5	Jan	C	High
Shell 2a.JPG	Hard Coral	Lobophyllia	Massive	UB	22	4.69042	Intertidal	6	1	E6	Jan	St	Low
Shell 2a.JPG	Substratum	Sand/Rubble			43	6.55744	Intertidal	6	1		Jan
Shell 2aa.JPG	Seaweed	Green seaweed			1	1	Intertidal	6	2		Jan
Shell 2aa.JPG	Substratum	Sand/Rubble			99	9.94987	Intertidal	6	2		Jan
Shell 2b.JPG	Hard Coral	Lobophyllia	Massive	UB	52	7.2111	Intertidal	6	3	E5	Jan	St	Low
Shell 2b.JPG	Substratum	Sand/Rubble			48	6.9282	Intertidal	6	3		Jan
Shell 2c.JPG	Hard Coral	Lobophyllia	Massive	UB	42	6.48074	Intertidal	6	4	E5	Jan	St	Low
Shell 2c.JPG	Substratum	Sand/Rubble			58	7.61577	Intertidal	6	4		Jan
Shell 2e.JPG	Hard Coral	Acropora	Branching	UB	6	2.44949	Intertidal	6	6	E5	Jan	C	High
Shell 2e.JPG	Hard Coral	Porites	Massive	UB	1	1	Intertidal	6	6	NA	Jan		High
Shell 2e.JPG	Seaweed	Green seaweed			3	1.73205	Intertidal	6	6		Jan
Shell 2e.JPG	Substratum	Sand/Rubble			90	9.48683	Intertidal	6	6		Jan
Shell 2d.JPG	Hard Coral	Acropora	Branching	UB	3	1.73205	Intertidal	6	5	E5	Jan	C	High
Shell 2d.JPG	Soft coral	Soft coral			1	1	Intertidal	6	5		Jan
Shell 2d.JPG	Seaweed	Brown seaweed			5	2.23607	Intertidal	6	5		Jan
Shell 2d.JPG	Substratum	Sand/Rubble			91	9.53939	Intertidal	6	5		Jan
Shell 2f.JPG	Seaweed	Green seaweed			2	1.41421	Intertidal	6	7		Jan
Shell 2f.JPG	Substratum	Sand/Rubble			98	9.89949	Intertidal	6	7		Jan
Shell 2g.JPG	Hard Coral	Acropora	Branching	UB	29	5.38516	Intertidal	6	8	E5	Jan	C	High
Shell 2g.JPG	Substratum	Sand/Rubble			71	8.42615	Intertidal	6	8		Jan
Shell 2j.JPG	Hard Coral	Acropora	Branching	UB	34	5.83095	Intertidal	6	9	E5	Jan	C	High
Shell 2j.JPG	Substratum	Sand/Rubble			66	8.12404	Intertidal	6	9		Jan
Shell 2k.JPG	Hard Coral	Acropora	Branching	UB	42	6.48074	Intertidal	6	10	E5	Jan	C	High
Shell 2k.JPG	Substratum	Sand/Rubble			58	7.61577	Intertidal	6	10		Jan
Shell 2l.JPG	Hard Coral	Acropora	Branching	UB	31	5.56776	Intertidal	6	11	E5	Jan	C	High
Shell 2l.JPG	Substratum	Sand/Rubble			69	8.30662	Intertidal	6	11		Jan
Shell 2m.JPG	Hard Coral	Acropora	Branching	UB	11	3.31662	Intertidal	6	12	E5	Jan	C	High
Shell 2m.JPG	Hard Coral	Unknown	Massive	UB	7	2.64575	Intertidal	6	12	E4	Jan
Shell 2m.JPG	Soft coral	Soft coral			7	2.64575	Intertidal	6	12		Jan
Shell 2m.JPG	Substratum	Sand/Rubble			75	8.66025	Intertidal	6	12		Jan
Shell 2n.JPG	Hard Coral	Acropora	Branching	UB	29	5.38516	Intertidal	6	13	E6	Jan	C	High
Shell 2n.JPG	Hard Coral	Favites	Encrusting	UB	2	1.41421	Intertidal	6	13	E4	Jan	St	High
Shell 2n.JPG	Soft coral	Soft coral			2	1.41421	Intertidal	6	13		Jan
Shell 2n.JPG	Substratum	Sand/Rubble			67	8.18535	Intertidal	6	13		Jan
Shell 2o.JPG	Hard Coral	Lobophyllia	Massive	UB	2	1.41421	Intertidal	6	14	E4	Jan	St	Low
Shell 2o.JPG	Hard Coral	Pavona	Massive	UB	1	1	Intertidal	6	14	E4	Jan		High
Shell 2o.JPG	Soft coral	Soft coral			4	2	Intertidal	6	14		Jan
Shell 2o.JPG	Seaweed	Green seaweed			2	1.41421	Intertidal	6	14		Jan
Shell 2o.JPG	Substratum	Sand/Rubble			91	9.53939	Intertidal	6	14		Jan
Shell 2p.JPG	Substratum	Sand/Rubble			100	10	Intertidal	6	15		Jan
Shell 2q.JPG	Hard Coral	Turbinaria	Plating	UB	3	1.73205	Intertidal	6	16	E5	Jan		Low
Shell 2q.JPG	Hard Coral	Pavona	Massive	UB	12	3.4641	Intertidal	6	16	E4	Jan		High
Shell 2q.JPG	Seaweed	Brown seaweed			7	2.64575	Intertidal	6	16		Jan
Shell 2q.JPG	Substratum	Sand/Rubble			78	8.83176	Intertidal	6	16		Jan
Shell 2s.JPG	Hard Coral	Porites	Massive	UB	5	2.23607	Intertidal	6	17	E4	Jan		High
Shell 2s.JPG	Hard Coral	Dipsastraea	Massive	UB	1	1	Intertidal	6	17	E5	Jan	St	Low
Shell 2s.JPG	Seaweed	Brown seaweed			23	4.79583	Intertidal	6	17		Jan
Shell 2s.JPG	Substratum	Sand/Rubble			71	8.42615	Intertidal	6	17		Jan
Shell 2t.JPG	Substratum	Sand/Rubble			100	10	Intertidal	6	18		Jan
Shell 2u.JPG	Substratum	Sand/Rubble			100	10	Intertidal	6	19		Jan
Shell 2v.JPG	Hard Coral	Acropora	Branching	UB	4	2	Intertidal	6	20	E5	Jan	C	High
Shell 2v.JPG	Hard Coral	Acropora	Branching	UB	5	2.23607	Intertidal	6	20	E4	Jan	C	High
Shell 2v.JPG	Hard Coral	Turbinaria	Plating	UB	1	1	Intertidal	6	20	E5	Jan		Low
Shell 2v.JPG	Seaweed	Green seaweed			3	1.73205	Intertidal	6	20		Jan
Shell 2v.JPG	Substratum	Sand/Rubble			87	9.32738	Intertidal	6	20		Jan
Shell 2w.JPG	Seaweed	Brown seaweed			12	3.4641	Intertidal	6	21		Jan
Shell 2w.JPG	Substratum	Sand/Rubble			88	9.38083	Intertidal	6	21		Jan
Shell 2y.JPG	Hard Coral	Acropora	Branching	UB	2	1.41421	Intertidal	6	22	E4	Jan	C	High
Shell 2y.JPG	Substratum	Sand/Rubble			98	9.89949	Intertidal	6	22		Jan
Shell 2z.JPG	Hard Coral	Seriatopora	Branching	S	10	3.16228	Intertidal	6	23	E2	Jan	W	Low
Shell 2z.JPG	Hard Coral	Porites	Massive	UB	26	5.09902	Intertidal	6	23	C5	Jan		High
Shell 2z.JPG	Hard Coral	Montipora	Plating	UB	11	3.31662	Intertidal	6	23	E5	Jan		Low
Shell 2z.JPG	Substratum	Sand/Rubble			53	7.28011	Intertidal	6	23		Jan
shell 2h.JPG	Hard Coral	Porites	Massive	UB	3	1.73205	Intertidal	6	24	E4	Jan		High
shell 2h.JPG	Soft coral	Soft coral			5	2.23607	Intertidal	6	24		Jan
shell 2h.JPG	Seaweed	Red seaweed			5	2.23607	Intertidal	6	24		Jan
shell 2h.JPG	Substratum	Sand/Rubble			87	9.32738	Intertidal	6	24		Jan
shell 2i.JPG	Hard Coral	Porites	Massive	UB	1	1	Intertidal	6	25	E4	Jan		High
shell 2i.JPG	Hard Coral	Pavona	Massive	UB	5	2.23607	Intertidal	6	25	E5	Jan		High
shell 2i.JPG	Soft coral	Soft coral			17	4.12311	Intertidal	6	25		Jan
shell 2i.JPG	Seaweed	Brown seaweed			4	2	Intertidal	6	25		Jan
shell 2i.JPG	Substratum	Sand/Rubble			73	8.544	Intertidal	6	25		Jan
shell 2r.JPG	Hard Coral	Porites	Massive	UB	1	1	Intertidal	6	26	E5	Jan		High
shell 2r.JPG	Soft coral	Soft coral			7	2.64575	Intertidal	6	26		Jan
shell 2r.JPG	Seaweed	Brown seaweed			20	4.47214	Intertidal	6	26		Jan
shell 2r.JPG	Substratum	Sand/Rubble			72	8.48528	Intertidal	6	26		Jan
Shell 3a.JPG	Hard Coral	Porites	Massive	UB	23	4.79583	Intertidal	7	1	NA	Jan		High
Shell 3a.JPG	Hard Coral	Montipora	Encrusting	UB	4	2	Intertidal	7	1	E5	Jan		Low
Shell 3a.JPG	Hard Coral	Pavona	Massive	S	2	1.41421	Intertidal	7	1	E1	Jan		High
Shell 3a.JPG	Soft coral	Soft coral			1	1	Intertidal	7	1		Jan
Shell 3a.JPG	Seaweed	Green seaweed			3	1.73205	Intertidal	7	1		Jan
Shell 3a.JPG	Seaweed	Brown seaweed			5	2.23607	Intertidal	7	1		Jan
Shell 3a.JPG	Substratum	Rock			14	3.74166	Intertidal	7	1		Jan
Shell 3a.JPG	Substratum	Sand/Rubble			48	6.9282	Intertidal	7	1		Jan
Shell 3b.JPG	Substratum	Sand/Rubble			100	10	Intertidal	7	2		Jan
Shell 3c.JPG	Substratum	Sand/Rubble			100	10	Intertidal	7	3		Jan
Shell 3d.JPG	Substratum	Sand/Rubble			100	10	Intertidal	7	4		Jan
Shell 3e.JPG	Hard Coral	Acropora	Branching	UB	2	1.41421	Intertidal	7	5	E5	Jan	C	High
Shell 3e.JPG	Substratum	Sand/Rubble			98	9.89949	Intertidal	7	5		Jan
Shell 3f.JPG	Hard Coral	Acropora	Branching	UB	1	1	Intertidal	7	6	E4	Jan	C	High
Shell 3f.JPG	Soft coral	Soft coral			9	3	Intertidal	7	6		Jan
Shell 3f.JPG	Substratum	Sand/Rubble			90	9.48683	Intertidal	7	6		Jan
Shell 3g.JPG	Hard Coral	Acropora	Branching	UB	3	1.73205	Intertidal	7	7	E5	Jan	C	High
Shell 3g.JPG	Soft coral	Soft coral			19	4.3589	Intertidal	7	7		Jan
Shell 3g.JPG	Seaweed	Brown seaweed			2	1.41421	Intertidal	7	7		Jan
Shell 3g.JPG	Substratum	Sand/Rubble			76	8.7178	Intertidal	7	7		Jan
Shell 3h.JPG	Substratum	Sand/Rubble			100	10	Intertidal	7	8		Jan
Shell 3i.JPG	Hard Coral	Porites	Massive	UB	2	1.41421	Intertidal	7	9	NA	Jan		High
Shell 3i.JPG	Seaweed	Brown seaweed			3	1.73205	Intertidal	7	9		Jan
Shell 3i.JPG	Substratum	Sand/Rubble			95	9.74679	Intertidal	7	9		Jan
Shell 3j.JPG	Substratum	Sand/Rubble			100	10	Intertidal	7	10		Jan
Shell 3k.JPG	Hard Coral	Goniopora	Massive	S	18	4.24264	Intertidal	7	11	E1	Jan
Shell 3k.JPG	Substratum	Sand/Rubble			82	9.05539	Intertidal	7	11		Jan
Shell 3l.JPG	Hard Coral	Goniopora	Massive	S	15	3.87298	Intertidal	7	12	E1	Jan
Shell 3l.JPG	Substratum	Sand/Rubble			85	9.21954	Intertidal	7	12		Jan
Shell 3n.JPG	Seaweed	Brown seaweed			2	1.41421	Intertidal	7	13		Jan
Shell 3n.JPG	Substratum	Sand/Rubble			98	9.89949	Intertidal	7	13		Jan
Shell 3o.JPG	Substratum	Sand/Rubble			100	10	Intertidal	7	14		Jan
Shell 3p.JPG	Hard Coral	Acropora	Branching	UB	15	3.87298	Intertidal	7	15	E4	Jan	C	High
Shell 3p.JPG	Soft coral	Soft coral			10	3.16228	Intertidal	7	15		Jan
Shell 3p.JPG	Seaweed	Brown seaweed			2	1.41421	Intertidal	7	15		Jan
Shell 3p.JPG	Substratum	Sand/Rubble			73	8.544	Intertidal	7	15		Jan
Shell 3q.JPG	Seaweed	Brown seaweed			5	2.23607	Intertidal	7	16		Jan
Shell 3q.JPG	Substratum	Sand/Rubble			95	9.74679	Intertidal	7	16		Jan
Shell 3r.JPG	Hard Coral	Porites	Massive	UB	1	1	Intertidal	7	17	E4	Jan		High
Shell 3r.JPG	Hard Coral	Lobophyllia	Massive	UB	2	1.41421	Intertidal	7	17	E5	Jan	St	Low
Shell 3r.JPG	Seaweed	Green seaweed			1	1	Intertidal	7	17		Jan
Shell 3r.JPG	Substratum	Sand/Rubble			96	9.79796	Intertidal	7	17		Jan
Shell 3s.JPG	Substratum	Sand/Rubble			100	10	Intertidal	7	18		Jan
Shell 3t.JPG	Soft coral	Soft coral			9	3	Intertidal	7	19		Jan
Shell 3t.JPG	Seaweed	Brown seaweed			11	3.31662	Intertidal	7	19		Jan
Shell 3t.JPG	Substratum	Sand/Rubble			80	8.94427	Intertidal	7	19		Jan
Shell 3u.JPG	Hard Coral	Acropora	Branching	UB	5	2.23607	Intertidal	7	20	E4	Jan	C	High
Shell 3u.JPG	Soft coral	Soft coral		UB	34	5.83095	Intertidal	7	20	E4	Jan
Shell 3u.JPG	Substratum	Sand/Rubble			61	7.81025	Intertidal	7	20		Jan
Shell 3v.JPG	Hard Coral	Turbinaria	Plating	UB	3	1.73205	Intertidal	7	21	NA	Jan		Low
Shell 3v.JPG	Seaweed	Brown seaweed			28	5.2915	Intertidal	7	21		Jan
Shell 3v.JPG	Substratum	Sand/Rubble			69	8.30662	Intertidal	7	21		Jan
Shell 3w.JPG	Seaweed	Brown seaweed			30	5.47723	Intertidal	7	22		Jan
Shell 3w.JPG	Substratum	Sand/Rubble			70	8.3666	Intertidal	7	22		Jan
Shell 3x.JPG	Seaweed	Brown seaweed			27	5.19615	Intertidal	7	23		Jan
Shell 3x.JPG	Substratum	Sand/Rubble			73	8.544	Intertidal	7	23		Jan
IMG_6652.JPG	Hard Coral	Acropora	Branching	UB	2	1.41421	Subtidal	1	1	E5	Jan	C	High
IMG_6652.JPG	Hard Coral	Favites	Encrusting	S	5	2.23607	Subtidal	1	1	D1	Jan	St	High
IMG_6652.JPG	Soft coral	Soft coral			2	1.41421	Subtidal	1	1		Jan
IMG_6652.JPG	Substratum	Sand/Rubble			91	9.53939	Subtidal	1	1		Jan
IMG_6654.JPG	Hard Coral	Acropora	Branching	UB	3	1.73205	Subtidal	1	2	E5	Jan	C	High
IMG_6654.JPG	Soft coral	Soft coral			5	2.23607	Subtidal	1	2		Jan
IMG_6654.JPG	Substratum	Sand/Rubble			92	9.59166	Subtidal	1	2		Jan
IMG_6655.JPG	Soft coral	Soft coral			3	1.73205	Subtidal	1	3		Jan
IMG_6655.JPG	Substratum	Sand/Rubble			97	9.84886	Subtidal	1	3		Jan
IMG_6656.JPG	Substratum	Sand/Rubble			100	10	Subtidal	1	4		Jan
IMG_6657.JPG	Hard Coral	Acropora	Plating	UB	3	1.73205	Subtidal	1	5	E6	Jan	C	High
IMG_6657.JPG	Hard Coral	Dipsastraea	Massive	UB	2	1.41421	Subtidal	1	5	E4	Jan	St	Low
IMG_6657.JPG	Hard Coral	Dipsastraea	Massive	M	1	1	Subtidal	1	5	E2	Jan	St	Low
IMG_6657.JPG	Hard Coral	Platygyra	Encrusting	UB	1	1	Subtidal	1	5	E4	Jan	St	High
IMG_6657.JPG	Hard Coral	Unknown	Encrusting	UB	3	1.73205	Subtidal	1	5	D5	Jan
IMG_6657.JPG	Substratum	Sand/Rubble			90	9.48683	Subtidal	1	5		Jan
IMG_6658.JPG	Hard Coral	Acropora	Plating	UB	16	4	Subtidal	1	6	E6	Jan	C	High
IMG_6658.JPG	Substratum	Sand/Rubble			84	9.16515	Subtidal	1	6		Jan
IMG_6659.JPG	Hard Coral	Platygyra	Encrusting	M	2	1.41421	Subtidal	1	7	E3	Jan	St	High
IMG_6659.JPG	Hard Coral	Unknown	Massive	UB	5	2.23607	Subtidal	1	7	NA	Jan
IMG_6659.JPG	Hard Coral	Unknown	Encrusting	UB	2	1.41421	Subtidal	1	7	E4	Jan
IMG_6659.JPG	Soft coral	Soft coral			2	1.41421	Subtidal	1	7		Jan
IMG_6659.JPG	Substratum	Sand/Rubble			89	9.43398	Subtidal	1	7		Jan
IMG_6661.JPG	Hard Coral	Acropora	Branching	UB	3	1.73205	Subtidal	1	8	E4	Jan	C	High
IMG_6661.JPG	Substratum	Sand/Rubble			97	9.84886	Subtidal	1	8		Jan
IMG_6662.JPG	Hard Coral	Acropora	Branching	UB	10	3.16228	Subtidal	1	9	E4	Jan	C	High
IMG_6662.JPG	Substratum	Sand/Rubble			90	9.48683	Subtidal	1	9		Jan
IMG_6663.JPG	Hard Coral	Acropora	Branching	UB	11	3.31662	Subtidal	1	10	E5	Jan	C	High
IMG_6663.JPG	Substratum	Sand/Rubble			89	9.43398	Subtidal	1	10		Jan
IMG_6664.JPG	Hard Coral	Acropora	Branching	UB	36	6	Subtidal	1	11	E5	Jan	C	High
IMG_6664.JPG	Hard Coral	Seriatopora	Branching	UB	10	3.16228	Subtidal	1	11	E4	Jan	W	Low
IMG_6664.JPG	Substratum	Sand/Rubble			54	7.34847	Subtidal	1	11		Jan
IMG_6665.JPG	Hard Coral	Acropora	Branching	UB	31	5.56776	Subtidal	1	12	E4	Jan	C	High
IMG_6665.JPG	Hard Coral	Seriatopora	Branching	UB	5	2.23607	Subtidal	1	12	E4	Jan	W	Low
IMG_6665.JPG	Substratum	Sand/Rubble			64	8	Subtidal	1	12		Jan
IMG_6666.JPG	Hard Coral	Acropora	Branching	UB	4	2	Subtidal	1	13	E4	Jan	C	High
IMG_6666.JPG	Substratum	Sand/Rubble			96	9.79796	Subtidal	1	13		Jan
IMG_6667.JPG	Hard Coral	Acropora	Branching	M	54	7.34847	Subtidal	1	14	E4	Jan	C	High
IMG_6667.JPG	Substratum	Sand/Rubble			46	6.78233	Subtidal	1	14		Jan
IMG_6668.JPG	Hard Coral	Acropora	Branching	UB	74	8.60233	Subtidal	1	15	E4	Jan	C	High
IMG_6668.JPG	Substratum	Sand/Rubble			26	5.09902	Subtidal	1	15		Jan
IMG_6669.JPG	Hard Coral	Acropora	Branching	UB	22	4.69042	Subtidal	1	16	E4	Jan	C	High
IMG_6669.JPG	Substratum	Sand/Rubble			78	8.83176	Subtidal	1	16		Jan
IMG_6671.JPG	Hard Coral	Acropora	Branching	UB	18	4.24264	Subtidal	1	18	E4	Jan	C	High
IMG_6671.JPG	Substratum	Sand/Rubble			82	9.05539	Subtidal	1	18		Jan
IMG_6672.JPG	Hard Coral	Acropora	Branching	UB	44	6.63325	Subtidal	1	19	E6	Jan	C	High
IMG_6672.JPG	Substratum	Sand/Rubble			56	7.48331	Subtidal	1	19		Jan
IMG_6673.JPG	Hard Coral	Acropora	Branching	UB	49	7	Subtidal	1	20	E6	Jan	C	High
IMG_6673.JPG	Substratum	Sand/Rubble			51	7.14143	Subtidal	1	20		Jan
IMG_6674.JPG	Hard Coral	Acropora	Branching	UB	93	9.64365	Subtidal	1	21	E6	Jan	C	High
IMG_6674.JPG	Substratum	Sand/Rubble			7	2.64575	Subtidal	1	21		Jan
IMG_6675.JPG	Hard Coral	Acropora	Branching	UB	31	5.56776	Subtidal	1	22	E6	Jan	C	High
IMG_6675.JPG	Substratum	Sand/Rubble			69	8.30662	Subtidal	1	22		Jan
IMG_6677.JPG	Substratum	Sand/Rubble			100	10	Subtidal	1	23		Jan
IMG_6678.JPG	Substratum	Sand/Rubble			100	10	Subtidal	1	24		Jan
IMG_6679.JPG	Substratum	Sand/Rubble			100	10	Subtidal	1	25		Jan
IMG_6680.JPG	Hard Coral	Acropora	Branching	UB	6	2.44949	Subtidal	1	26	E6	Jan	C	High
IMG_6680.JPG	Hard Coral	Unknown	Massive	UB	1	1	Subtidal	1	26	D6	Jan
IMG_6680.JPG	Substratum	Sand/Rubble			93	9.64365	Subtidal	1	26		Jan
IMG_6681.JPG	Hard Coral	Acropora	Branching	UB	20	4.47214	Subtidal	1	27	E5	Jan	C	High
IMG_6681.JPG	Substratum	Sand/Rubble			80	8.94427	Subtidal	1	27		Jan
IMG_6682.JPG	Hard Coral	Acropora	Branching	UB	2	1.41421	Subtidal	1	28	E4	Jan	C	High
IMG_6682.JPG	Substratum	Sand/Rubble			98	9.89949	Subtidal	1	28		Jan
IMG_6683.JPG	Hard Coral	Acropora	Branching	UB	19	4.3589	Subtidal	1	29	E3	Jan	C	High
IMG_6683.JPG	Hard Coral	Lobophyllia	Encrusting	UB	2	1.41421	Subtidal	1	29	E3	Jan	St	Low
IMG_6683.JPG	Hard Coral	Dipsastraea	Massive	S	2	1.41421	Subtidal	1	29	E3	Jan	St	Low
IMG_6683.JPG	Soft coral	Soft coral			2	1.41421	Subtidal	1	29		Jan
IMG_6683.JPG	Substratum	Sand/Rubble			75	8.66025	Subtidal	1	29		Jan
IMG_6684.JPG	Hard Coral	Acropora	Branching	UB	3	1.73205	Subtidal	1	30	E5	Jan	C	High
IMG_6684.JPG	Hard Coral	Platygyra	Encrusting	S	1	1	Subtidal	1	30	E1	Jan	St	High
IMG_6684.JPG	Hard Coral	Fungia	Free living	UB	5	2.23607	Subtidal	1	30	D4	Jan	St	Low
IMG_6684.JPG	Soft coral	Soft coral			17	4.12311	Subtidal	1	30		Jan
IMG_6684.JPG	Substratum	Sand/Rubble			74	8.60233	Subtidal	1	30		Jan
IMG_0475.JPG	Hard Coral	Acropora	Branching	UB	3	1.73205	Subtidal	2	1	E5	Jan	C	High
IMG_0475.JPG	Hard Coral	Pocillopora	Branching	UB	16	4	Subtidal	2	1	NA	Jan	W	Low
IMG_0475.JPG	Substratum	Sand/Rubble			81	9	Subtidal	2	1		Jan
IMG_0476.JPG	Substratum	Sand/Rubble			100	10	Subtidal	2	2		Jan
IMG_0477.JPG	Substratum	Sand/Rubble			100	10	Subtidal	2	3		Jan
IMG_0478.JPG	Hard Coral	Acropora	Branching	UB	23	4.79583	Subtidal	2	4	E5	Jan	C	High
IMG_0478.JPG	Substratum	Sand/Rubble			77	8.77496	Subtidal	2	4		Jan
IMG_0479.JPG	Hard Coral	Acropora	Branching	UB	30	5.47723	Subtidal	2	5	E4	Jan	C	High
IMG_0479.JPG	Hard Coral	Pocillopora	Branching	UB	2	1.41421	Subtidal	2	5	E3	Jan	W	Low
IMG_0479.JPG	Substratum	Sand/Rubble			68	8.24621	Subtidal	2	5		Jan
IMG_0480.JPG	Substratum	Sand/Rubble			100	10	Subtidal	2	6		Jan
IMG_0481.JPG	Substratum	Sand/Rubble			100	10	Subtidal	2	7		Jan
IMG_0482.JPG	Substratum	Sand/Rubble			100	10	Subtidal	2	8		Jan
IMG_0483.JPG	Substratum	Sand/Rubble			100	10	Subtidal	2	9		Jan
IMG_0484.JPG	Hard Coral	Acropora	Branching	UB	22	4.69042	Subtidal	2	10	E3	Jan	C	High
IMG_0484.JPG	Substratum	Sand/Rubble			78	8.83176	Subtidal	2	10		Jan
IMG_0485.JPG	Hard Coral	Acropora	Branching	UB	32	5.65685	Subtidal	2	11	E3	Jan	C	High
IMG_0485.JPG	Soft coral	Soft coral			5	2.23607	Subtidal	2	11		Jan
IMG_0485.JPG	Seaweed	Green seaweed			10	3.16228	Subtidal	2	11		Jan
IMG_0485.JPG	Substratum	Sand/Rubble			53	7.28011	Subtidal	2	11		Jan
IMG_0486.JPG	Hard Coral	Acropora	Branching	UB	1	1	Subtidal	2	12	E2	Jan	C	High
IMG_0486.JPG	Hard Coral	Unknown	Encrusting	M	3	1.73205	Subtidal	2	12	E2	Jan
IMG_0486.JPG	Seaweed	Green seaweed			7	2.64575	Subtidal	2	12		Jan
IMG_0486.JPG	Substratum	Sand/Rubble			89	9.43398	Subtidal	2	12		Jan
IMG_0487.JPG	Hard Coral	Acropora	Branching	UB	1	1	Subtidal	2	13	E4	Jan	C	High
IMG_0487.JPG	Substratum	Sand/Rubble			99	9.94987	Subtidal	2	13		Jan
IMG_0488.JPG	Hard Coral	Acropora	Branching	UB	1	1	Subtidal	2	14	E4	Jan	C	High
IMG_0488.JPG	Substratum	Sand/Rubble			99	9.94987	Subtidal	2	14		Jan
IMG_0489.JPG	Substratum	Sand/Rubble			100	10	Subtidal	2	15		Jan
IMG_0490.JPG	Substratum	Sand/Rubble			100	10	Subtidal	2	16		Jan
IMG_0491.JPG	Substratum	Sand/Rubble			100	10	Subtidal	2	17		Jan
IMG_0492.JPG	Substratum	Sand/Rubble			100	10	Subtidal	2	18		Jan
IMG_0493.JPG	Substratum	Sand/Rubble			100	10	Subtidal	2	19		Jan
IMG_0494.JPG	Hard Coral	Acropora	Branching	UB	26	5.09902	Subtidal	2	20	E3	Jan	C	High
IMG_0494.JPG	Substratum	Sand/Rubble			74	8.60233	Subtidal	2	20		Jan
IMG_0496.JPG	Hard Coral	Acropora	Branching	UB	29	5.38516	Subtidal	2	21	E3	Jan	C	High
IMG_0496.JPG	Substratum	Sand/Rubble			71	8.42615	Subtidal	2	21		Jan
IMG_0498.JPG	Hard Coral	Acropora	Branching	UB	7	2.64575	Subtidal	2	22	E3	Jan	C	High
IMG_0498.JPG	Substratum	Sand/Rubble			93	9.64365	Subtidal	2	22		Jan
IMG_0499.JPG	Substratum	Sand/Rubble			100	10	Subtidal	2	23		Jan
IMG_0501.JPG	Substratum	Sand/Rubble			100	10	Subtidal	2	24		Jan
IMG_0502.JPG	Hard Coral	Acropora	Branching	UB	17	4.12311	Subtidal	2	25	E3	Jan	C	High
IMG_0502.JPG	Substratum	Sand/Rubble			83	9.11043	Subtidal	2	25		Jan
IMG_0503.JPG	Hard Coral	Acropora	Branching	UB	75	8.66025	Subtidal	2	25	E3	Jan	C	High
IMG_0503.JPG	Hard Coral	Pocillopora	Branching	UB	3	1.73205	Subtidal	2	25	E3	Jan	W	Low
IMG_0503.JPG	Hard Coral	Unknown	Encrusting	UB	3	1.73205	Subtidal	2	25	E3	Jan
IMG_0503.JPG	Substratum	Sand/Rubble			19	4.3589	Subtidal	2	25		Jan
IMG_0504.JPG	Hard Coral	Acropora	Branching	UB	20	4.47214	Subtidal	2	26	E3	Jan	C	High
IMG_0504.JPG	Substratum	Sand/Rubble			80	8.94427	Subtidal	2	26		Jan
IMG_0505.JPG	Hard Coral	Acropora	Branching	UB	7	2.64575	Subtidal	2	27	E3	Jan	C	High
IMG_0505.JPG	Substratum	Sand/Rubble			93	9.64365	Subtidal	2	27		Jan
IMG_0506.JPG	Hard Coral	Acropora	Branching	UB	71	8.42615	Subtidal	2	28	E3	Jan	C	High
IMG_0506.JPG	Substratum	Sand/Rubble			29	5.38516	Subtidal	2	28		Jan
IMG_0507.JPG	Hard Coral	Acropora	Branching	UB	91	9.53939	Subtidal	2	29	E3	Jan	C	High
IMG_0507.JPG	Substratum	Sand/Rubble			9	3	Subtidal	2	29		Jan
IMG_0508.JPG	Hard Coral	Acropora	Branching	UB	37	6.08276	Subtidal	2	30	E2	Jan	C	High
IMG_0508.JPG	Substratum	Sand/Rubble			63	7.93725	Subtidal	2	30		Jan
IMG_0511.JPG	Hard Coral	Acropora	Branching	UB	2	1.41421	Subtidal	3	1	E3	Jan	C	High
IMG_0511.JPG	Substratum	Sand/Rubble			98	9.89949	Subtidal	3	1		Jan
IMG_0512.JPG	Hard Coral	Acropora	Branching	UB	43	6.55744	Subtidal	3	2	E3	Jan	C	High
IMG_0512.JPG	Hard Coral	Seriatopora	Branching	UB	8	2.82843	Subtidal	3	2	E3	Jan	W	Low
IMG_0512.JPG	Substratum	Sand/Rubble			49	7	Subtidal	3	2		Jan
IMG_0513.JPG	Hard Coral	Acropora	Branching	UB	22	4.69042	Subtidal	3	3	E3	Jan	C	High
IMG_0513.JPG	Substratum	Sand/Rubble			78	8.83176	Subtidal	3	3		Jan
IMG_0514.JPG	Substratum	Sand/Rubble			100	10	Subtidal	3	4		Jan
IMG_0515.JPG	Hard Coral	Acropora	Branching	UB	7	2.64575	Subtidal	3	5	E4	Jan	C	High
IMG_0515.JPG	Substratum	Sand/Rubble			93	9.64365	Subtidal	3	5		Jan
IMG_0517.JPG	Hard Coral	Acropora	Branching	UB	6	2.44949	Subtidal	3	6	E4	Jan	C	High
IMG_0517.JPG	Substratum	Sand/Rubble			94	9.69536	Subtidal	3	6		Jan
IMG_0519.JPG	Hard Coral	Acropora	Branching	UB	2	1.41421	Subtidal	3	7	E3	Jan	C	High
IMG_0519.JPG	Hard Coral	Acropora	Branching	M	7	2.64575	Subtidal	3	7	E2	Jan	C	High
IMG_0519.JPG	Substratum	Sand/Rubble			91	9.53939	Subtidal	3	7		Jan
IMG_0520.JPG	Substratum	Sand/Rubble			100	10	Subtidal	3	8		Jan
IMG_0521.JPG	Hard Coral	Acropora	Branching	UB	20	4.47214	Subtidal	3	9	E4	Jan	C	High
IMG_0521.JPG	Substratum	Sand/Rubble			80	8.94427	Subtidal	3	9		Jan
IMG_0523.JPG	Hard Coral	Acropora	Branching	UB	21	4.58258	Subtidal	3	10	E4	Jan	C	High
IMG_0523.JPG	Hard Coral	Acropora	Branching	M	6	2.44949	Subtidal	3	10	E3	Jan	C	High
IMG_0523.JPG	Hard Coral	Unknown	Branching	UB	2	1.41421	Subtidal	3	10	E4	Jan
IMG_0523.JPG	Substratum	Sand/Rubble			71	8.42615	Subtidal	3	10		Jan
IMG_0527.JPG	Hard Coral	Acropora	Branching	UB	52	7.2111	Subtidal	3	11	E3	Jan	C	High
IMG_0527.JPG	Substratum	Sand/Rubble			48	6.9282	Subtidal	3	11		Jan
IMG_0528.JPG	Hard Coral	Acropora	Branching	UB	90	9.48683	Subtidal	3	12	E3	Jan	C	High
IMG_0528.JPG	Substratum	Sand/Rubble			10	3.16228	Subtidal	3	12		Jan
IMG_0529.JPG	Hard Coral	Acropora	Branching	UB	46	6.78233	Subtidal	3	13	E3	Jan	C	High
IMG_0529.JPG	Substratum	Sand/Rubble			54	7.34847	Subtidal	3	13		Jan
IMG_0530.JPG	Hard Coral	Acropora	Branching	UB	68	8.24621	Subtidal	3	14	E3	Jan	C	High
IMG_0530.JPG	Substratum	Sand/Rubble			32	5.65685	Subtidal	3	14		Jan
IMG_0531.JPG	Hard Coral	Acropora	Branching	UB	8	2.82843	Subtidal	3	15	E4	Jan	C	High
IMG_0531.JPG	Seaweed	Green seaweed			26	5.09902	Subtidal	3	15		Jan
IMG_0531.JPG	Substratum	Sand/Rubble			66	8.12404	Subtidal	3	15		Jan
IMG_0532.JPG	Substratum	Sand/Rubble			100	10	Subtidal	3	16		Jan
IMG_0533.JPG	Hard Coral	Acropora	Branching	UB	65	8.06226	Subtidal	3	17	E3	Jan	C	High
IMG_0533.JPG	Substratum	Sand/Rubble			35	5.91608	Subtidal	3	17		Jan
IMG_0534.JPG	Hard Coral	Acropora	Branching	UB	50	7.07107	Subtidal	3	18	E4	Jan	C	High
IMG_0534.JPG	Substratum	Sand/Rubble			50	7.07107	Subtidal	3	18		Jan
IMG_0535.JPG	Hard Coral	Acropora	Branching	UB	68	8.24621	Subtidal	3	19	E4	Jan	C	High
IMG_0535.JPG	Substratum	Sand/Rubble			32	5.65685	Subtidal	3	19		Jan
IMG_0536.JPG	Hard Coral	Acropora	Branching	UB	75	8.66025	Subtidal	3	20	E4	Jan	C	High
IMG_0536.JPG	Substratum	Sand/Rubble			25	5	Subtidal	3	20		Jan
IMG_0537.JPG	Hard Coral	Acropora	Branching	UB	64	8	Subtidal	3	21	E4	Jan	C	High
IMG_0537.JPG	Substratum	Sand/Rubble			36	6	Subtidal	3	21		Jan
IMG_0538.JPG	Hard Coral	Acropora	Branching	UB	83	9.11043	Subtidal	3	22	E4	Jan	C	High
IMG_0538.JPG	Substratum	Sand/Rubble			17	4.12311	Subtidal	3	22		Jan
IMG_0540.JPG	Hard Coral	Acropora	Branching	UB	57	7.54983	Subtidal	3	23	E4	Jan	C	High
IMG_0540.JPG	Substratum	Sand/Rubble			43	6.55744	Subtidal	3	23		Jan
IMG_0542.JPG	Substratum	Sand/Rubble			100	10	Subtidal	3	25		Jan
IMG_0543.JPG	Substratum	Sand/Rubble			100	10	Subtidal	3	26		Jan
IMG_0544.JPG	Substratum	Sand/Rubble			100	10	Subtidal	3	27		Jan
IMG_0545.JPG	Substratum	Sand/Rubble			100	10	Subtidal	3	28		Jan
IMG_0546.JPG	Substratum	Sand/Rubble			100	10	Subtidal	3	29		Jan
IMG_0547.JPG	Substratum	Sand/Rubble			100	10	Subtidal	3	30		Jan
IMG_0646.JPG	Hard Coral	Seriatopora	Branching	M	25	5	Subtidal	4	1	E2	Jan	W	Low
IMG_0646.JPG	Substratum	Sand/Rubble			15	3.87298	Subtidal	4	1		Jan
IMG_0646.JPG	Hard Coral	Unknown	Encrusting	UB	60	7.74597	Subtidal	4	1	D5	Jan
IMG_0647.JPG	Hard Coral	Seriatopora	Branching	M	14	3.74166	Subtidal	4	2	E2	Jan	W	Low
IMG_0647.JPG	Hard Coral	Unknown	Massive	UB	8	2.82843	Subtidal	4	2	NA	Jan
IMG_0647.JPG	Substratum	Sand/Rubble			78	8.83176	Subtidal	4	2		Jan
IMG_0648.JPG	Hard Coral	Unknown	Massive	UB	8	2.82843	Subtidal	4	3	NA	Jan
IMG_0648.JPG	Substratum	Sand/Rubble			92	9.59166	Subtidal	4	3		Jan
IMG_0649.JPG	Hard Coral	Unknown	Branching	UB	10	3.16228	Subtidal	4	4	E5	Jan
IMG_0649.JPG	Substratum	Sand/Rubble			90	9.48683	Subtidal	4	4		Jan
IMG_0651.JPG	Substratum	Sand/Rubble			100	10	Subtidal	4	5		Jan
IMG_0652.JPG	Hard Coral	Acropora	Branching	UB	19	4.3589	Subtidal	4	6	E4	Jan	C	High
IMG_0652.JPG	Substratum	Sand/Rubble			81	9	Subtidal	4	6		Jan
IMG_0655.JPG	Hard Coral	Acropora	Branching	UB	5	2.23607	Subtidal	4	7	E4	Jan	C	High
IMG_0655.JPG	Hard Coral	Seriatopora	Branching	M	17	4.12311	Subtidal	4	7	E3	Jan	W	Low
IMG_0655.JPG	Substratum	Sand/Rubble			78	8.83176	Subtidal	4	7		Jan
IMG_0656.JPG	Hard Coral	Seriatopora	Branching	M	22	4.69042	Subtidal	4	8	E3	Jan	W	Low
IMG_0656.JPG	Hard Coral	Unknown	Massive	UB	16	4	Subtidal	4	8	NA	Jan
IMG_0656.JPG	Substratum	Sand/Rubble			62	7.87401	Subtidal	4	8		Jan
IMG_0657.JPG	Hard Coral	Porites	Massive	UB	12	3.4641	Subtidal	4	9	NA	Jan		High
IMG_0657.JPG	Substratum	Sand/Rubble			82	9.05539	Subtidal	4	9		Jan
IMG_0657.JPG	Hard Coral	Unknown	Branching	M	6	2.44949	Subtidal	4	9	E3	Jan
IMG_0658.JPG	Hard Coral	Acropora	Branching	UB	13	3.60555	Subtidal	4	10	E4	Jan	C	High
IMG_0658.JPG	Hard Coral	Seriatopora	Branching	M	15	3.87298	Subtidal	4	10	E3	Jan	W	Low
IMG_0658.JPG	Soft coral	Soft coral			1	1	Subtidal	4	10		Jan
IMG_0658.JPG	Substratum	Sand/Rubble			71	8.42615	Subtidal	4	10		Jan
IMG_0659.JPG	Substratum	Sand/Rubble			95	9.74679	Subtidal	4	11		Jan
IMG_0659.JPG	Hard Coral	Turbinaria	Plating	M	5	2.23607	Subtidal	4	11	NA	Jan		Low
IMG_0661.JPG	Substratum	Sand/Rubble			100	10	Subtidal	4	12		Jan
IMG_0662.JPG	Substratum	Sand/Rubble			100	10	Subtidal	4	13		Jan
IMG_0663.JPG	Substratum	Sand/Rubble			94	9.69536	Subtidal	4	14		Jan
IMG_0663.JPG	Hard Coral	Turbinaria	Plating	UB	6	2.44949	Subtidal	4	14	E3	Jan		Low
IMG_0664.JPG	Hard Coral	Unknown	Massive	UB	1	1	Subtidal	4	15	E3	Jan
IMG_0664.JPG	Substratum	Sand/Rubble			99	9.94987	Subtidal	4	15		Jan
IMG_0665.JPG	Substratum	Sand/Rubble			100	10	Subtidal	4	16		Jan
IMG_0667.JPG	Hard Coral	Acropora	Branching	UB	20	4.47214	Subtidal	4	17	E4	Jan	C	High
IMG_0667.JPG	Substratum	Sand/Rubble			80	8.94427	Subtidal	4	17		Jan
IMG_0668.JPG	Hard Coral	Acropora	Branching	UB	29	5.38516	Subtidal	4	18	E4	Jan	C	High
IMG_0668.JPG	Substratum	Sand/Rubble			71	8.42615	Subtidal	4	18		Jan
IMG_0669.JPG	Substratum	Sand/Rubble			100	10	Subtidal	4	19		Jan
IMG_0670.JPG	Substratum	Sand/Rubble			100	10	Subtidal	4	20		Jan
IMG_0673.JPG	Hard Coral	Acropora	Branching	UB	10	3.16228	Subtidal	4	22	E5	Jan	C	High
IMG_0673.JPG	Substratum	Sand/Rubble			90	9.48683	Subtidal	4	22		Jan
IMG_0674.JPG	Hard Coral	Acropora	Branching	UB	8	2.82843	Subtidal	4	23	E4	Jan	C	High
IMG_0674.JPG	Hard Coral	Unknown	Massive	UB	2	1.41421	Subtidal	4	23	E4	Jan
IMG_0674.JPG	Substratum	Sand/Rubble			90	9.48683	Subtidal	4	23		Jan
IMG_0675.JPG	Hard Coral	Acropora	Branching	UB	4	2	Subtidal	4	24	E4	Jan	C	High
IMG_0675.JPG	Hard Coral	Unknown	Branching	UB	4	2	Subtidal	4	24	NA	Jan
IMG_0675.JPG	Substratum	Sand/Rubble			92	9.59166	Subtidal	4	24		Jan
IMG_0678.JPG	Hard Coral	Acropora	Branching	UB	56	7.48331	Subtidal	4	25	E3	Jan	C	High
IMG_0678.JPG	Substratum	Sand/Rubble			44	6.63325	Subtidal	4	25		Jan
IMG_0681.JPG	Hard Coral	Acropora	Branching	UB	25	5	Subtidal	4	26	E6	Jan	C	High
IMG_0681.JPG	Substratum	Sand/Rubble			75	8.66025	Subtidal	4	26		Jan
IMG_0682.JPG	Hard Coral	Acropora	Branching	UB	39	6.245	Subtidal	4	27	E4	Jan	C	High
IMG_0682.JPG	Substratum	Sand/Rubble			61	7.81025	Subtidal	4	27		Jan
IMG_0683.JPG	Hard Coral	Acropora	Branching	UB	87	9.32738	Subtidal	4	28	E4	Jan	C	High
IMG_0683.JPG	Substratum	Sand/Rubble			13	3.60555	Subtidal	4	28		Jan
IMG_0684.JPG	Hard Coral	Acropora	Branching	UB	56	7.48331	Subtidal	4	29	E4	Jan	C	High
IMG_0684.JPG	Substratum	Sand/Rubble			44	6.63325	Subtidal	4	29		Jan
IMG_0685.JPG	Hard Coral	Acropora	Branching	UB	27	5.19615	Subtidal	4	30	E4	Jan	C	High
IMG_0685.JPG	Substratum	Sand/Rubble			73	8.544	Subtidal	4	30		Jan
P1140169.JPG	Hard Coral	Acropora	Branching	UB	69	8.30662	Subtidal	5	1	E6	Jan	C	High
P1140169.JPG	Hard Coral	Pocillopora	Branching	UB	2	1.41421	Subtidal	5	1	NA	Jan	W	Low
P1140169.JPG	Substratum	Sand/Rubble			29	5.38516	Subtidal	5	1		Jan
P1140170.JPG	Hard Coral	Acropora	Branching	UB	55	7.4162	Subtidal	5	2	E6	Jan	C	High
P1140170.JPG	Substratum	Sand/Rubble			45	6.7082	Subtidal	5	2		Jan
P1140171.JPG	Hard Coral	Acropora	Branching	UB	47	6.85565	Subtidal	5	3	E5	Jan	C	High
P1140171.JPG	Substratum	Sand/Rubble			53	7.28011	Subtidal	5	3		Jan
P1140172.JPG	Hard Coral	Acropora	Branching	UB	8	2.82843	Subtidal	5	4	E6	Jan	C	High
P1140172.JPG	Hard Coral	Acropora	Branching	UB	55	7.4162	Subtidal	5	4	E4	Jan	C	High
P1140172.JPG	Substratum	Sand/Rubble			37	6.08276	Subtidal	5	4		Jan
P1140174.JPG	Hard Coral	Acropora	Branching	UB	24	4.89898	Subtidal	5	5	E6	Jan	C	High
P1140174.JPG	Hard Coral	Acropora	Branching	UB	9	3	Subtidal	5	5	E4	Jan	C	High
P1140174.JPG	Substratum	Sand/Rubble			67	8.18535	Subtidal	5	5		Jan
P1140175.JPG	Hard Coral	Acropora	Branching	UB	47	6.85565	Subtidal	5	6	E4	Jan	C	High
P1140175.JPG	Substratum	Sand/Rubble			53	7.28011	Subtidal	5	6		Jan
P1140176.JPG	Hard Coral	Acropora	Branching	UB	16	4	Subtidal	5	7	E6	Jan	C	High
P1140176.JPG	Substratum	Sand/Rubble			84	9.16515	Subtidal	5	7		Jan
P1140177.JPG	Hard Coral	Acropora	Branching	UB	52	7.2111	Subtidal	5	8	E5	Jan	C	High
P1140177.JPG	Substratum	Sand/Rubble			48	6.9282	Subtidal	5	8		Jan
P1140179.JPG	Hard Coral	Acropora	Branching	UB	77	8.77496	Subtidal	5	9	E5	Jan	C	High
P1140179.JPG	Substratum	Sand/Rubble			23	4.79583	Subtidal	5	9		Jan
P1140180.JPG	Hard Coral	Acropora	Branching	UB	58	7.61577	Subtidal	5	10	E5	Jan	C	High
P1140180.JPG	Hard Coral	Pocillopora	Branching	UB	4	2	Subtidal	5	10	NA	Jan	W	Low
P1140180.JPG	Substratum	Sand/Rubble			38	6.16441	Subtidal	5	10		Jan
P1140181.JPG	Hard Coral	Acropora	Branching	UB	83	9.11043	Subtidal	5	11	E5	Jan	C	High
P1140181.JPG	Hard Coral	Pocillopora	Branching	UB	6	2.44949	Subtidal	5	11	NA	Jan	W	Low
P1140181.JPG	Substratum	Sand/Rubble			11	3.31662	Subtidal	5	11		Jan
P1140182.JPG	Hard Coral	Acropora	Branching	UB	73	8.544	Subtidal	5	12	E5	Jan	C	High
P1140182.JPG	Hard Coral	Seriatopora	Branching	UB	2	1.41421	Subtidal	5	12	E4	Jan	W	Low
P1140182.JPG	Substratum	Sand/Rubble			25	5	Subtidal	5	12		Jan
P1140184.JPG	Hard Coral	Acropora	Branching	UB	65	8.06226	Subtidal	5	13	E5	Jan	C	High
P1140184.JPG	Substratum	Sand/Rubble			35	5.91608	Subtidal	5	13		Jan
P1140185.JPG	Hard Coral	Seriatopora	Branching	UB	2	1.41421	Subtidal	5	14	E4	Jan	W	Low
P1140185.JPG	Substratum	Sand/Rubble			98	9.89949	Subtidal	5	14		Jan
P1140186.JPG	Substratum	Sand/Rubble			100	10	Subtidal	5	15		Jan
P1140189.JPG	Hard Coral	Acropora	Branching	UB	9	3	Subtidal	5	16	E5	Jan	C	High
P1140189.JPG	Substratum	Sand/Rubble			66	8.12404	Subtidal	5	16		Jan
P1140189.JPG	Hard Coral	Unknown	Massive	UB	25	5	Subtidal	5	16	D5	Jan
P1140190.JPG	Hard Coral	Acropora	Branching	UB	43	6.55744	Subtidal	5	17	E5	Jan	C	High
P1140190.JPG	Substratum	Sand/Rubble			57	7.54983	Subtidal	5	17		Jan
P1140191.JPG	Hard Coral	Acropora	Branching	UB	72	8.48528	Subtidal	5	18	E5	Jan	C	High
P1140191.JPG	Substratum	Sand/Rubble			28	5.2915	Subtidal	5	18		Jan
P1140192.JPG	Hard Coral	Acropora	Branching	UB	78	8.83176	Subtidal	5	19	E5	Jan	C	High
P1140192.JPG	Substratum	Sand/Rubble			22	4.69042	Subtidal	5	19		Jan
P1140193.JPG	Hard Coral	Acropora	Branching	UB	88	9.38083	Subtidal	5	20	E4	Jan	C	High
P1140193.JPG	Hard Coral	Pocillopora	Branching	UB	2	1.41421	Subtidal	5	20	NA	Jan	W	Low
P1140193.JPG	Substratum	Sand/Rubble			10	3.16228	Subtidal	5	20		Jan
P1140194.JPG	Hard Coral	Acropora	Branching	UB	69	8.30662	Subtidal	5	21	E4	Jan	C	High
P1140194.JPG	Hard Coral	Seriatopora	Branching	UB	4	2	Subtidal	5	21	E4	Jan	W	Low
P1140194.JPG	Substratum	Sand/Rubble			27	5.19615	Subtidal	5	21		Jan
P1140195.JPG	Hard Coral	Acropora	Branching	UB	100	10	Subtidal	5	22	E6	Jan	C	High
P1140196.JPG	Hard Coral	Acropora	Branching	UB	66	8.12404	Subtidal	5	23	E6	Jan	C	High
P1140196.JPG	Substratum	Sand/Rubble			34	5.83095	Subtidal	5	23		Jan
P1140197.JPG	Hard Coral	Acropora	Branching	UB	16	4	Subtidal	5	24	E6	Jan	C	High
P1140197.JPG	Substratum	Sand/Rubble			84	9.16515	Subtidal	5	24		Jan
P1140198.JPG	Hard Coral	Acropora	Branching	UB	34	5.83095	Subtidal	5	25	E6	Jan	C	High
P1140198.JPG	Hard Coral	Seriatopora	Branching	M	8	2.82843	Subtidal	5	25	E3	Jan	W	Low
P1140198.JPG	Substratum	Sand/Rubble			58	7.61577	Subtidal	5	25		Jan
P1140199.JPG	Hard Coral	Acropora	Branching	UB	22	4.69042	Subtidal	5	26	E6	Jan	C	High
P1140199.JPG	Hard Coral	Seriatopora	Branching	M	18	4.24264	Subtidal	5	26	E3	Jan	W	Low
P1140199.JPG	Hard Coral	Seriatopora	Branching	S	2	1.41421	Subtidal	5	26	E2	Jan	W	Low
P1140199.JPG	Substratum	Sand/Rubble			58	7.61577	Subtidal	5	26		Jan
P1140201.JPG	Hard Coral	Acropora	Branching	UB	54	7.34847	Subtidal	5	27	E6	Jan	C	High
P1140201.JPG	Hard Coral	Seriatopora	Branching	UB	6	2.44949	Subtidal	5	27	E4	Jan	W	Low
P1140201.JPG	Substratum	Sand/Rubble			40	6.32456	Subtidal	5	27		Jan
P1140202.JPG	Hard Coral	Acropora	Branching	UB	47	6.85565	Subtidal	5	28	E6	Jan	C	High
P1140202.JPG	Hard Coral	Acropora	Branching	UB	23	4.79583	Subtidal	5	28	E5	Jan	C	High
P1140202.JPG	Hard Coral	Pocillopora	Branching	UB	5	2.23607	Subtidal	5	28	E5	Jan	W	Low
P1140202.JPG	Hard Coral	Stylophora	Branching	S	6	2.44949	Subtidal	5	28	E1	Jan	W	Low
P1140202.JPG	Hard Coral	Turbinaria	Plating	UB	9	3	Subtidal	5	28	NA	Jan		Low
P1140202.JPG	Hard Coral	Dipsastraea	Massive	UB	1	1	Subtidal	5	28	E4	Jan	St	Low
P1140202.JPG	Substratum	Sand/Rubble			9	3	Subtidal	5	28		Jan
P1140203.JPG	Hard Coral	Acropora	Branching	UB	22	4.69042	Subtidal	5	29	E4	Jan	C	High
P1140203.JPG	Hard Coral	Stylophora	Branching	S	5	2.23607	Subtidal	5	29	E1	Jan	W	Low
P1140203.JPG	Hard Coral	Turbinaria	Plating	UB	16	4	Subtidal	5	29	NA	Jan		Low
P1140203.JPG	Hard Coral	Dipsastraea	Massive	UB	1	1	Subtidal	5	29	E4	Jan	St	Low
P1140203.JPG	Substratum	Sand/Rubble			56	7.48331	Subtidal	5	29		Jan
P1140205.JPG	Substratum	Sand/Rubble			100	10	Subtidal	5	30		Jan
Q2.png	Hard Coral	Acropora	Branching	UB	100	10	Subtidal	6	2	E5	Jan	C	High
Q3.png	Hard Coral	Acropora	Branching	UB	73	8.544	Subtidal	6	3	E5	Jan	C	High
Q3.png	Hard Coral	Turbinaria	Plating	UB	6	2.44949	Subtidal	6	3	D5	Jan		Low
Q3.png	Substratum	Sand/Rubble			21	4.58258	Subtidal	6	3		Jan
Q1.png	Hard Coral	Acropora	Branching	UB	100	10	Subtidal	6	1	E5	Jan	C	High
Q4.png	Hard Coral	Acropora	Branching	UB	78	8.83176	Subtidal	6	4	E5	Jan	C	High
Q4.png	Substratum	Sand/Rubble			22	4.69042	Subtidal	6	4		Jan
Q5.png	Hard Coral	Acropora	Branching	UB	44	6.63325	Subtidal	6	5	E5	Jan	C	High
Q5.png	Seaweed	Green seaweed			20	4.47214	Subtidal	6	5		Jan
Q5.png	Substratum	Sand/Rubble			36	6	Subtidal	6	5		Jan
Q6.png	Hard Coral	Acropora	Branching	UB	56	7.48331	Subtidal	6	6	E4	Jan	C	High
Q6.png	Seaweed	Green seaweed			3	1.73205	Subtidal	6	6		Jan
Q6.png	Substratum	Sand/Rubble			41	6.40312	Subtidal	6	6		Jan
Q7.png	Hard Coral	Acropora	Branching	UB	61	7.81025	Subtidal	6	7	E5	Jan	C	High
Q7.png	Seaweed	Green seaweed			10	3.16228	Subtidal	6	7		Jan
Q7.png	Substratum	Sand/Rubble			29	5.38516	Subtidal	6	7		Jan
Q8.png	Hard Coral	Acropora	Branching	UB	91	9.53939	Subtidal	6	8	E4	Jan	C	High
Q8.png	Seaweed	Seagrass			9	3	Subtidal	6	8		Jan
Q9.png	Hard Coral	Acropora	Branching	UB	100	10	Subtidal	6	9	E4	Jan	C	High
Q10.png	Hard Coral	Acropora	Branching	UB	72	8.48528	Subtidal	6	10	E4	Jan	C	High
Q10.png	Substratum	Sand/Rubble			28	5.2915	Subtidal	6	10		Jan
Q11.JPG	Substratum	Sand/Rubble			100	10	Subtidal	6	11		Jan
Q12.png	Soft coral	Soft coral			14	3.74166	Subtidal	6	12		Jan
Q12.png	Substratum	Sand/Rubble			86	9.27362	Subtidal	6	12		Jan
Q13.png	Hard Coral	Acropora	Branching	UB	29	5.38516	Subtidal	6	13	E5	Jan	C	High
Q13.png	Substratum	Sand/Rubble			71	8.42615	Subtidal	6	13		Jan
Q14.png	Hard Coral	Acropora	Branching	UB	17	4.12311	Subtidal	6	14	E5	Jan	C	High
Q14.png	Soft coral	Soft coral			11	3.31662	Subtidal	6	14		Jan
Q14.png	Substratum	Sand/Rubble			72	8.48528	Subtidal	6	14		Jan
Q15.png	Hard Coral	Acropora	Branching	UB	11	3.31662	Subtidal	6	25	E4	Jan	C	High
Q15.png	Substratum	Sand/Rubble			89	9.43398	Subtidal	6	15		Jan
Q16.png	Seaweed	Green seaweed			5	2.23607	Subtidal	6	16		Jan
Q16.png	Substratum	Sand/Rubble			95	9.74679	Subtidal	6	16		Jan
Q17.png	Hard Coral	Turbinaria	Plating	UB	29	5.38516	Subtidal	6	17	E4	Jan		Low
Q17.png	Substratum	Sand/Rubble			71	8.42615	Subtidal	6	17		Jan
Q18.png	Hard Coral	Turbinaria	Plating	UB	3	1.73205	Subtidal	6	18	E4	Jan		Low
Q18.png	Soft coral	Soft coral			2	1.41421	Subtidal	6	18		Jan
Q18.png	Substratum	Sand/Rubble			95	9.74679	Subtidal	6	18		Jan
Q19.png	Hard Coral	Acropora	Branching	UB	2	1.41421	Subtidal	6	19	E4	Jan	C	High
Q19.png	Hard Coral	Favites	Encrusting	UB	5	2.23607	Subtidal	6	19	E5	Jan	St	High
Q19.png	Seaweed	Green seaweed			4	2	Subtidal	6	19		Jan
Q19.png	Substratum	Sand/Rubble			89	9.43398	Subtidal	6	19		Jan
Q20.png	Hard Coral	Platygyra	Encrusting	UB	1	1	Subtidal	6	20	E4	Jan	St	High
Q20.png	Soft coral	Soft coral			4	2	Subtidal	6	20		Jan
Q20.png	Seaweed	Green seaweed			1	1	Subtidal	6	20		Jan
Q20.png	Substratum	Sand/Rubble			94	9.69536	Subtidal	6	20		Jan
Q21.png	Hard Coral	Acropora	Branching	UB	46	6.78233	Subtidal	6	21	E5	Jan	C	High
Q21.png	Substratum	Sand/Rubble			54	7.34847	Subtidal	6	21		Jan
Q22.png	Hard Coral	Favites	Encrusting	UB	3	1.73205	Subtidal	6	22	E5	Jan	St	High
Q22.png	Soft coral	Soft coral			10	3.16228	Subtidal	6	22		Jan
Q22.png	Substratum	Sand/Rubble			87	9.32738	Subtidal	6	22		Jan
Q23.png	Hard Coral	Stylophora	Branching	UB	3	1.73205	Subtidal	6	23	E4	Jan	W	Low
Q23.png	Soft coral	Soft coral			3	1.73205	Subtidal	6	23		Jan
Q23.png	Substratum	Sand/Rubble			94	9.69536	Subtidal	6	23		Jan
Q24.png	Hard Coral	Stylophora	Branching	S	20	4.47214	Subtidal	6	24	E1	Jan	W	Low
Q24.png	Substratum	Sand/Rubble			80	8.94427	Subtidal	6	24		Jan
Q25.png	Hard Coral	Stylophora	Branching	S	1	1	Subtidal	6	25	E1	Jan	W	Low
Q25.png	Seaweed	Green seaweed			9	3	Subtidal	6	25		Jan
Q25.png	Substratum	Sand/Rubble			90	9.48683	Subtidal	6	25		Jan
Q26.png	Seaweed	Green seaweed			7	2.64575	Subtidal	6	26		Jan
Q26.png	Substratum	Sand/Rubble			93	9.64365	Subtidal	6	26		Jan
Q27.png	Seaweed	Green seaweed			4	2	Subtidal	6	27		Jan
Q27.png	Substratum	Sand/Rubble			96	9.79796	Subtidal	6	27		Jan
Q28.png	Seaweed	Green seaweed			5	2.23607	Subtidal	6	28		Jan
Q28.png	Substratum	Sand/Rubble			95	9.74679	Subtidal	6	28		Jan
Q29.png	Seaweed	Green seaweed			18	4.24264	Subtidal	6	29		Jan
Q29.png	Substratum	Sand/Rubble			82	9.05539	Subtidal	6	29		Jan
1.JPG	Hard Coral	Acropora	Branching	UB	3	1.73205	Intertidal	1	1	E5	April	C	High
1.JPG	Hard Coral	Acropora	Branching	M	7	2.64575	Intertidal	1	1	E3	April	C	High
1.JPG	Seaweed	Green seaweed			4	2	Intertidal	1	1		April
1.JPG	Substratum	Sand/Rubble			86	9.27362	Intertidal	1	1		April
2.JPG	Hard Coral	Acropora	Branching	M	47	6.85565	Intertidal	1	2	E4	April	C	High
2.JPG	Substratum	Sand/Rubble			53	7.28011	Intertidal	1	2	E2	April
3.JPG	Hard Coral	Acropora	Branching	S	42	6.48074	Intertidal	1	3	E1	April	C	High
3.JPG	Seaweed	Green seaweed			2	1.41421	Intertidal	1	3		April
3.JPG	Substratum	Sand/Rubble			56	7.48331	Intertidal	1	3		April
4.JPG	Hard Coral	Acropora	Branching	M	72	8.48528	Intertidal	1	4	E4	April	C	High
4.JPG	Substratum	Sand/Rubble			28	5.2915	Intertidal	1	4		April
5.JPG	Hard Coral	Acropora	Branching	S	55	7.4162	Intertidal	1	5	E2	April	C	High
5.JPG	Seaweed	Green seaweed			2	1.41421	Intertidal	1	5		April
5.JPG	Seaweed	Red seaweed			3	1.73205	Intertidal	1	5		April
5.JPG	Substratum	Sand/Rubble			40	6.32456	Intertidal	1	5		April
6.JPG	Hard Coral	Acropora	Branching	UB	3	1.73205	Intertidal	1	6	E5	April	C	High
6.JPG	Hard Coral	Acropora	Branching	S	16	4	Intertidal	1	6	E2	April	C	High
6.JPG	Seaweed	Green seaweed			6	2.44949	Intertidal	1	6		April
6.JPG	Substratum	Sand/Rubble			75	8.66025	Intertidal	1	6		April
7.JPG	Soft coral	Soft coral		S	1	1	Intertidal	1	7	E3	April
7.JPG	Seaweed	CCA		UB	1	1	Intertidal	1	7		April
7.JPG	Substratum	Sand/Rubble			98	9.89949	Intertidal	1	7		April
8.JPG	Substratum	Sand/Rubble			100	10	Intertidal	1	8		April
9.JPG	Seaweed	Green seaweed			3	1.73205	Intertidal	1	9		April
9.JPG	Substratum	Sand/Rubble			97	9.84886	Intertidal	1	9		April
10.JPG	Substratum	Sand/Rubble			100	10	Intertidal	1	10		April
11.JPG	Hard Coral	Porites	Massive	M	16	4	Intertidal	1	11	NA	April		High
11.JPG	Seaweed	Green seaweed			4	2	Intertidal	1	11		April
11.JPG	Substratum	Sand/Rubble			80	8.94427	Intertidal	1	11		April
12.JPG	Hard Coral	Porites	Massive	M	10	3.16228	Intertidal	1	12	NA	April		High
12.JPG	Seaweed	Green seaweed			4	2	Intertidal	1	12		April
12.JPG	Substratum	Sand/Rubble			86	9.27362	Intertidal	1	12		April
13.JPG	Seaweed	CCA		UB	1	1	Intertidal	1	13		April
13.JPG	Substratum	Sand/Rubble			99	9.94987	Intertidal	1	13		April
14.JPG	Hard Coral	Acropora	Branching	M	9	3	Intertidal	1	14	E5	April	C	High
14.JPG	Seaweed	CCA		UB	1	1	Intertidal	1	14		April
14.JPG	Substratum	Sand/Rubble			90	9.48683	Intertidal	1	14		April
15.JPG	Hard Coral	Acropora	Branching	M	4	2	Intertidal	1	15	E5	April	C	High
15.JPG	Substratum	Sand/Rubble			96	9.79796	Intertidal	1	15		April
16.JPG	Hard Coral	Acropora	Branching	M	11	3.31662	Intertidal	1	16	E5	April	C	High
16.JPG	Hard Coral	Acropora	Branching	D	11	3.31662	Intertidal	1	16	Covered by turf	April	C	High
16.JPG	Substratum	Sand/Rubble			78	8.83176	Intertidal	1	16		April
17.JPG	Seaweed	Green seaweed			3	1.73205	Intertidal	1	17		April
17.JPG	Substratum	Sand/Rubble			97	9.84886	Intertidal	1	17		April
18.JPG	Seaweed	Green seaweed			3	1.73205	Intertidal	1	18		April
18.JPG	Substratum	Sand/Rubble			97	9.84886	Intertidal	1	18		April
19.JPG	Hard Coral	Acropora	Branching	UB	8	2.82843	Intertidal	1	19	E5	April	C	High
19.JPG	Seaweed	Green seaweed			5	2.23607	Intertidal	1	19		April
19.JPG	Substratum	Sand/Rubble			87	9.32738	Intertidal	1	19		April
20.JPG	Seaweed	Green seaweed			5	2.23607	Intertidal	1	20		April
20.JPG	Substratum	Sand/Rubble			95	9.74679	Intertidal	1	20		April
21.JPG	Substratum	Sand/Rubble			100	10	Intertidal	1	21		April
22.JPG	Seaweed	CCA		UB	1	1	Intertidal	1	22		April
22.JPG	Substratum	Sand/Rubble			99	9.94987	Intertidal	1	22		April
23.JPG	Hard Coral	Acropora	Branching	S	10	3.16228	Intertidal	1	23	NA	April	C	High
23.JPG	Hard Coral	Acropora	Branching	S	6	2.44949	Intertidal	1	23	E1	April	C	High
23.JPG	Hard Coral	Acropora	Branching	D	4	2	Intertidal	1	23	Covered by turf	April	C	High
23.JPG	Substratum	Sand/Rubble			80	8.94427	Intertidal	1	23		April
24.JPG	Hard Coral	Acropora	Branching	S	82	9.05539	Intertidal	1	24	NA	April	C	High
24.JPG	Hard Coral	Acropora	Branching	D	5	2.23607	Intertidal	1	24	Covered by turf	April	C	High
24.JPG	Seaweed	Brown seaweed			5	2.23607	Intertidal	1	24		April
24.JPG	Substratum	Sand/Rubble			8	2.82843	Intertidal	1	24		April
25.JPG	Hard Coral	Acropora	Branching	S	77	8.77496	Intertidal	1	25	NA	April	C	High
25.JPG	Hard Coral	Acropora	Branching	D	20	4.47214	Intertidal	1	25	Covered by turf	April	C	High
25.JPG	Substratum	Sand/Rubble			3	1.73205	Intertidal	1	25		April
26.JPG	Hard Coral	Acropora	Branching	S	33	5.74456	Intertidal	1	26	NA	April	C	High
26.JPG	Hard Coral	Acropora	Branching	D	10	3.16228	Intertidal	1	26	Covered by turf	April	C	High
26.JPG	Substratum	Sand/Rubble			57	7.54983	Intertidal	1	26		April
27.JPG	Seaweed	Green seaweed			5	2.23607	Intertidal	1	27		April
27.JPG	Substratum	Sand/Rubble			95	9.74679	Intertidal	1	27		April
28.JPG	Hard Coral	Porites	Massive	M	6	2.44949	Intertidal	1	28	D2	April		High
28.JPG	Seaweed	CCA		UB	3	1.73205	Intertidal	1	28		April
28.JPG	Substratum	Sand/Rubble			91	9.53939	Intertidal	1	28		April
29.JPG	Hard Coral	Acropora	Branching	UB	4	2	Intertidal	1	29	E5	April	C	High
29.JPG	Seaweed	CCA		UB	3	1.73205	Intertidal	1	29		April
29.JPG	Seaweed	Green seaweed			5	2.23607	Intertidal	1	29		April
29.JPG	Substratum	Sand/Rubble			88	9.38083	Intertidal	1	29		April
30.JPG	Hard Coral	Acropora	Branching	UB	9	3	Intertidal	1	30	E5	April	C	High
30.JPG	Soft coral	Soft coral		UB	4	2	Intertidal	1	30	E4	April
30.JPG	Seaweed	CCA		UB	6	2.44949	Intertidal	1	30		April
30.JPG	Substratum	Sand/Rubble			81	9	Intertidal	1	30		April
1.JPG	Hard Coral	Acropora	Branching	S	43	6.55744	Intertidal	2	1	E3	April	C	High
1.JPG	Seaweed	Green seaweed			1	1	Intertidal	2	1		April
1.JPG	Substratum	Sand/Rubble			56	7.48331	Intertidal	2	1		April
2.JPG	Hard Coral	Acropora	Branching	S	49	7	Intertidal	2	2	E3	April	C	High
2.JPG	Substratum	Sand/Rubble			51	7.14143	Intertidal	2	2		April
3.JPG	Hard Coral	Acropora	Branching	S	12	3.4641	Intertidal	2	3	E3	April	C	High
3.JPG	Substratum	Sand/Rubble			88	9.38083	Intertidal	2	3		April
4.JPG	Hard Coral	Acropora	Branching	S	17	4.12311	Intertidal	2	4	E2	April	C	High
4.JPG	Hard Coral	Lobophyllia	Massive	UB	48	6.9282	Intertidal	2	4	E4	April	St	Low
4.JPG	Substratum	Sand/Rubble			35	5.91608	Intertidal	2	4		April
6.JPG	Hard Coral	Acropora	Branching	S	71	8.42615	Intertidal	2	5	E1	April	C	High
6.JPG	Hard Coral	Lobophyllia	Massive	UB	13	3.60555	Intertidal	2	5	E4	April	St	Low
6.JPG	Substratum	Sand/Rubble			16	4	Intertidal	2	5		April
7.JPG	Hard Coral	Acropora	Branching	S	2	1.41421	Intertidal	2	6	E1	April	C	High
7.JPG	Hard Coral	Acropora	Branching	S	64	8	Intertidal	2	6	E2	April	C	High
7.JPG	Hard Coral	Lobophyllia	Massive	UB	5	2.23607	Intertidal	2	6	D5	April	St	Low
7.JPG	Substratum	Sand/Rubble			29	5.38516	Intertidal	2	6		April
8.JPG	Hard Coral	Acropora	Branching	S	69	8.30662	Intertidal	2	7	E2	April	C	High
8.JPG	Hard Coral	Acropora	Branching	D	31	5.56776	Intertidal	2	7	Covered by turf	April	C	High
9.JPG	Hard Coral	Acropora	Branching	S	100	10	Intertidal	2	8	E2	April	C	High
10.JPG	Hard Coral	Acropora	Branching	S	64	8	Intertidal	2	9	E2	April	C	High
10.JPG	Hard Coral	Acropora	Branching	D	26	5.09902	Intertidal	2	9	Covered by turf	April	C	High
10.JPG	Substratum	Sand/Rubble			10	3.16228	Intertidal	2	9		April
11.JPG	Hard Coral	Acropora	Branching	S	22	4.69042	Intertidal	2	10	E2	April	C	High
11.JPG	Hard Coral	Acropora	Branching	D	61	7.81025	Intertidal	2	10	Covered by turf	April	C	High
11.JPG	Substratum	Sand/Rubble			17	4.12311	Intertidal	2	10		April
12.JPG	Hard Coral	Acropora	Branching	S	40	6.32456	Intertidal	2	11	E2	April	C	High
12.JPG	Substratum	Sand/Rubble			60	7.74597	Intertidal	2	11		April
14.JPG	Hard Coral	Acropora	Branching	M	3	1.73205	Intertidal	2	12	E5	April	C	High
14.JPG	Substratum	Sand/Rubble			97	9.84886	Intertidal	2	12		April
15.JPG	Hard Coral	Acropora	Branching	M	7	2.64575	Intertidal	2	15	E5	April	C	High
15.JPG	Substratum	Sand/Rubble			93	9.64365	Intertidal	2	15		April
16.JPG	Hard Coral	Acropora	Branching	M	34	5.83095	Intertidal	2	16	E5	April	C	High
16.JPG	Hard Coral	Unknown	Massive	S	2	1.41421	Intertidal	2	16	E1	April
16.JPG	Substratum	Sand/Rubble			64	8	Intertidal	2	16		April
17.JPG	Hard Coral	Acropora	Branching	S	50	7.07107	Intertidal	2	17	E4	April	C	High
17.JPG	Substratum	Sand/Rubble			50	7.07107	Intertidal	2	17		April
18.JPG	Hard Coral	Acropora	Branching	M	22	4.69042	Intertidal	2	18	E4	April	C	High
18.JPG	Soft coral	Soft coral		S	18	4.24264	Intertidal	2	18	D2	April
18.JPG	Substratum	Sand/Rubble			60	7.74597	Intertidal	2	18		April
19.JPG	Hard Coral	Acropora	Branching	M	2	1.41421	Intertidal	2	19	E4	April	C	High
19.JPG	Soft coral	Soft coral			11	3.31662	Intertidal	2	19		April
19.JPG	Substratum	Sand/Rubble			87	9.32738	Intertidal	2	19		April
20.JPG	Hard Coral	Acropora	Branching	M	1	1	Intertidal	2	20	E5	April	C	High
20.JPG	Substratum	Sand/Rubble			99	9.94987	Intertidal	2	20		April
21.JPG	Substratum	Sand/Rubble			100	10	Intertidal	2	21		April
22.JPG	Hard Coral	Acropora	Branching	M	7	2.64575	Intertidal	2	22	E5	April	C	High
22.JPG	Hard Coral	Porites	Massive	S	2	1.41421	Intertidal	2	22	E1	April		High
22.JPG	Substratum	Sand/Rubble			91	9.53939	Intertidal	2	22		April
22a.JPG	Hard Coral	Acropora	Branching	M	4	2	Intertidal	2	23	E4	April	C	High
22a.JPG	Substratum	Sand/Rubble			96	9.79796	Intertidal	2	23		April
23.JPG	Hard Coral	Porites	Branching	S	2	1.41421	Intertidal	2	24	E1	April		High
23.JPG	Substratum	Sand/Rubble			98	9.89949	Intertidal	2	24		April
24.JPG	Hard Coral	Acropora	Branching	M	17	4.12311	Intertidal	2	25	E4	April	C	High
24.JPG	Substratum	Sand/Rubble			83	9.11043	Intertidal	2	25		April
25.JPG	Hard Coral	Acropora	Branching	M	16	4	Intertidal	2	26	E4	April	C	High
25.JPG	Substratum	Sand/Rubble			84	9.16515	Intertidal	2	26		April
26.JPG	Hard Coral	Acropora	Branching	M	10	3.16228	Intertidal	2	27	E5	April	C	High
26.JPG	Substratum	Sand/Rubble			90	9.48683	Intertidal	2	27		April
27.JPG	Hard Coral	Acropora	Branching	M	12	3.4641	Intertidal	2	28	E4	April	C	High
27.JPG	Substratum	Sand/Rubble			88	9.38083	Intertidal	2	28		April
28.JPG	Hard Coral	Acropora	Branching	M	11	3.31662	Intertidal	2	29	E5	April	C	High
28.JPG	Substratum	Sand/Rubble			89	9.43398	Intertidal	2	29		April
29.JPG	Hard Coral	Acropora	Branching	M	6	2.44949	Intertidal	2	30	E5	April	C	High
29.JPG	Hard Coral	Acropora	Branching	S	13	3.60555	Intertidal	2	30	E1	April	C	High
29.JPG	Seaweed	Green seaweed			11	3.31662	Intertidal	2	30		April
29.JPG	Substratum	Sand/Rubble			70	8.3666	Intertidal	2	30		April
30.JPG	Hard Coral	Acropora	Branching	UB	2	1.41421	Intertidal	2	31	E6	April	C	High
30.JPG	Hard Coral	Acropora	Branching	S	4	2	Intertidal	2	31	E2	April	C	High
30.JPG	Hard Coral	Acropora	Branching	D	14	3.74166	Intertidal	2	31	Covered by turf	April	C	High
30.JPG	Substratum	Sand/Rubble			80	8.94427	Intertidal	2	31		April
31.JPG	Hard Coral	Acropora	Branching	S	9	3	Intertidal	2	32	E2	April	C	High
31.JPG	Hard Coral	Acropora	Branching	D	5	2.23607	Intertidal	2	32	Covered by turf	April	C	High
31.JPG	Substratum	Sand/Rubble			86	9.27362	Intertidal	2	32		April
1.JPG	Hard Coral	Acropora	Branching	M	32	5.65685	Intertidal	3	1	E4	April	C	High
1.JPG	Hard Coral	Porites	Massive	S	5	2.23607	Intertidal	3	1	E1	April		High
1.JPG	Hard Coral	Dipsastraea	Massive	S	4	2	Intertidal	3	1	E1	April	St	Low
1.JPG	Seaweed	Green seaweed			2	1.41421	Intertidal	3	1		April
1.JPG	Substratum	Sand/Rubble			57	7.54983	Intertidal	3	1		April
2.JPG	Hard Coral	Acropora	Branching	M	6	2.44949	Intertidal	3	2	E4	April	C	High
2.JPG	Hard Coral	Porites	Massive	S	5	2.23607	Intertidal	3	2	E1	April		High
2.JPG	Soft coral	Soft coral			2	1.41421	Intertidal	3	2		April
2.JPG	Seaweed	Green seaweed			10	3.16228	Intertidal	3	2		April
2.JPG	Substratum	Sand/Rubble			77	8.77496	Intertidal	3	2		April
3.JPG	Hard Coral	Acropora	Branching	M	3	1.73205	Intertidal	3	3	E4	April	C	High
3.JPG	Substratum	Sand/Rubble			97	9.84886	Intertidal	3	3		April
4.JPG	Hard Coral	Acropora	Branching	M	23	4.79583	Intertidal	3	4	E4	April	C	High
4.JPG	Substratum	Sand/Rubble			77	8.77496	Intertidal	3	4		April
5.JPG	Hard Coral	Acropora	Branching	M	47	6.85565	Intertidal	3	5	E4	April	C	High
5.JPG	Soft coral	Soft coral			3	1.73205	Intertidal	3	5		April
5.JPG	Substratum	Sand/Rubble			50	7.07107	Intertidal	3	5		April
6.JPG	Hard Coral	Acropora	Branching	S	87	9.32738	Intertidal	3	6	E2	April	C	High
6.JPG	Hard Coral	Acropora	Branching	D	13	3.60555	Intertidal	3	6	Dead	April	C	High
7.JPG	Hard Coral	Acropora	Branching	S	84	9.16515	Intertidal	3	7	E2	April	C	High
7.JPG	Hard Coral	Acropora	Branching	D	16	4	Intertidal	3	7	Dead	April	C	High
8.JPG	Hard Coral	Acropora	Branching	S	82	9.05539	Intertidal	3	8	E2	April	C	High
8.JPG	Hard Coral	Acropora	Branching	D	18	4.24264	Intertidal	3	8	Dead	April	C	High
9.JPG	Hard Coral	Acropora	Branching	S	42	6.48074	Intertidal	3	9	E2	April	C	High
9.JPG	Hard Coral	Acropora	Branching	D	58	7.61577	Intertidal	3	9	Dead	April	C	High
10.JPG	Hard Coral	Acropora	Branching	S	67	8.18535	Intertidal	3	10	E2	April	C	High
10.JPG	Hard Coral	Acropora	Branching	D	19	4.3589	Intertidal	3	10	Dead	April	C	High
10.JPG	Seaweed	Green seaweed			14	3.74166	Intertidal	3	10		April
11.JPG	Hard Coral	Acropora	Branching	S	82	9.05539	Intertidal	3	11	E3	April	C	High
11.JPG	Substratum	Sand/Rubble			18	4.24264	Intertidal	3	11		April
12.JPG	Hard Coral	Acropora	Branching	M	22	4.69042	Intertidal	3	12	E4	April	C	High
12.JPG	Substratum	Sand/Rubble			78	8.83176	Intertidal	3	12		April
13.JPG	Hard Coral	Acropora	Branching	UB	59	7.68115	Intertidal	3	13	E4	April	C	High
13.JPG	Substratum	Sand/Rubble			41	6.40312	Intertidal	3	13		April
14.JPG	Hard Coral	Acropora	Branching	M	57	7.54983	Intertidal	3	14	E4	April	C	High
14.JPG	Hard Coral	Porites	Massive	S	2	1.41421	Intertidal	3	14	E1	April		High
14.JPG	Seaweed	Green seaweed			1	1	Intertidal	3	14		April
14.JPG	Substratum	Sand/Rubble			40	6.32456	Intertidal	3	14		April
15.JPG	Hard Coral	Acropora	Branching	UB	26	5.09902	Intertidal	3	15	E5	April	C	High
15.JPG	Hard Coral	Acropora	Branching	S	33	5.74456	Intertidal	3	15	E1	April	C	High
15.JPG	Substratum	Sand/Rubble			41	6.40312	Intertidal	3	15		April
16.JPG	Hard Coral	Acropora	Branching	UB	65	8.06226	Intertidal	3	16	E5	April	C	High
16.JPG	Substratum	Sand/Rubble			35	5.91608	Intertidal	3	16		April
17.JPG	Hard Coral	Acropora	Branching	UB	22	4.69042	Intertidal	3	17	E6	April	C	High
17.JPG	Substratum	Sand/Rubble			78	8.83176	Intertidal	3	17		April
18.JPG	Hard Coral	Acropora	Branching	M	60	7.74597	Intertidal	3	18	E4	April	C	High
18.JPG	Substratum	Sand/Rubble			40	6.32456	Intertidal	3	18		April
19.JPG	Hard Coral	Acropora	Branching	M	93	9.64365	Intertidal	3	19	E4	April	C	High
19.JPG	Substratum	Sand/Rubble			7	2.64575	Intertidal	3	19		April
20.JPG	Hard Coral	Acropora	Branching	S	45	6.7082	Intertidal	3	20	E3	April	C	High
20.JPG	Substratum	Sand/Rubble			55	7.4162	Intertidal	3	20		April
21.JPG	Hard Coral	Acropora	Branching	UB	41	6.40312	Intertidal	3	21	E5	April	C	High
21.JPG	Hard Coral	Acropora	Branching	D	8	2.82843	Intertidal	3	21	Covered by turf	April	C	High
21.JPG	Substratum	Sand/Rubble			51	7.14143	Intertidal	3	21		April
22.JPG	Hard Coral	Acropora	Branching	UB	26	5.09902	Intertidal	3	22	E5	April	C	High
22.JPG	Seaweed	Green seaweed			4	2	Intertidal	3	22		April
22.JPG	Substratum	Sand/Rubble			70	8.3666	Intertidal	3	22		April
23.JPG	Hard Coral	Acropora	Branching	D	18	4.24264	Intertidal	3	23	Covered by turf	April	C	High
23.JPG	Seaweed	Green seaweed			7	2.64575	Intertidal	3	23		April
23.JPG	Substratum	Sand/Rubble			75	8.66025	Intertidal	3	23		April
24.JPG	Substratum	Sand/Rubble			100	10	Intertidal	3	24		April
25.JPG	Substratum	Sand/Rubble			100	10	Intertidal	3	25		April
26.JPG	Substratum	Sand/Rubble			100	10	Intertidal	3	26		April
27.JPG	Hard Coral	Acropora	Branching	M	3	1.73205	Intertidal	3	27	E4	April	C	High
27.JPG	Soft coral	Soft coral			6	2.44949	Intertidal	3	27		April
27.JPG	Substratum	Sand/Rubble			91	9.53939	Intertidal	3	27		April
28.JPG	Soft coral	Soft coral			2	1.41421	Intertidal	3	28		April
28.JPG	Seaweed	Brown seaweed			7	2.64575	Intertidal	3	28		April
28.JPG	Substratum	Sand/Rubble			91	9.53939	Intertidal	3	28		April
29.JPG	Hard Coral	Acropora	Branching	M	2	1.41421	Intertidal	3	29	E5	April	C	High
29.JPG	Hard Coral	Acropora	Branching	D	13	3.60555	Intertidal	3	29	Covered by turf	April	C	High
29.JPG	Substratum	Sand/Rubble			85	9.21954	Intertidal	3	29		April
30.JPG	Hard Coral	Acropora	Branching	M	4	2	Intertidal	3	30	E3	April	C	High
30.JPG	Hard Coral	Acropora	Branching	D	8	2.82843	Intertidal	3	30	Covered by turf	April	C	High
30.JPG	Substratum	Sand/Rubble			88	9.38083	Intertidal	3	30		April
31.JPG	Hard Coral	Acropora	Branching	UB	4	2	Intertidal	3	31	E6	April	C	High
31.JPG	Hard Coral	Acropora	Branching	S	37	6.08276	Intertidal	3	31	E3	April	C	High
31.JPG	Soft coral	Soft coral			2	1.41421	Intertidal	3	31		April
31.JPG	Seaweed	Green seaweed			7	2.64575	Intertidal	3	31		April
31.JPG	Substratum	Sand/Rubble			50	7.07107	Intertidal	3	31		April
1.png	Hard Coral	Unknown	Branching	S	52	7.2111	Intertidal	4	1	E1	April
1.png	Seaweed	Green seaweed			4	2	Intertidal	4	1		April
1.png	Substratum	Sand/Rubble			44	6.63325	Intertidal	4	1		April
2.png	Hard Coral	Acropora	Branching	UB	2	1.41421	Intertidal	4	2	E5	April	C	High
2.png	Hard Coral	Unknown	Encrusting	M	25	5	Intertidal	4	2	C2	April
2.png	Substratum	Sand/Rubble			73	8.544	Intertidal	4	2		April
3.png	Hard Coral	Unknown	Branching	S	44	6.63325	Intertidal	4	3	E1	April
3.png	Substratum	Sand/Rubble			56	7.48331	Intertidal	4	3		April
4.JPG	Hard Coral	Acropora	Branching	S	2	1.41421	Intertidal	4	4	E1	April	C	High
4.JPG	Hard Coral	Unknown	Branching	S	9	3	Intertidal	4	4	E1	April
4.JPG	Substratum	Sand/Rubble			89	9.43398	Intertidal	4	4		April
5.JPG	Hard Coral	Unknown	Branching	S	22	4.69042	Intertidal	4	5	E1	April
5.JPG	Substratum	Sand/Rubble			78	8.83176	Intertidal	4	5		April
6.JPG	Hard Coral	Unknown	Branching	S	14	3.74166	Intertidal	4	6	E1	April
6.JPG	Substratum	Sand/Rubble			86	9.27362	Intertidal	4	6		April
7.JPG	Hard Coral	Unknown	Branching	S	21	4.58258	Intertidal	4	7	E1	April
7.JPG	Substratum	Sand/Rubble			79	8.88819	Intertidal	4	7		April
8.JPG	Hard Coral	Unknown	Branching	S	8	2.82843	Intertidal	4	8	E1	April
8.JPG	Substratum	Sand/Rubble			92	9.59166	Intertidal	4	8		April
9.JPG	Hard Coral	Galaxea	Massive	S	1	1	Intertidal	4	9	B4	April	St	Low
9.JPG	Seaweed	Green seaweed			1	1	Intertidal	4	9		April
9.JPG	Substratum	Sand/Rubble			98	9.89949	Intertidal	4	9		April
10.JPG	Hard Coral	Galaxea	Massive	S	8	2.82843	Intertidal	4	10	E1	April	St	Low
10.JPG	Hard Coral	Unknown	Encrusting	S	1	1	Intertidal	4	10	E1	April
10.JPG	Seaweed	Green seaweed	seaweed		3	1.73205	Intertidal	4	10		April
10.JPG	Substratum	Sand/Rubble			88	9.38083	Intertidal	4	10		April
11.JPG	Hard Coral	Acropora	Branching	UB	46	6.78233	Intertidal	4	11	E5	April	C	High
11.JPG	Hard Coral	Porites	Massive	D	5	2.23607	Intertidal	4	11	Dead	April		High
11.JPG	Substratum	Sand/Rubble			49	7	Intertidal	4	11		April
12.JPG	Hard Coral	Galaxea	Massive	S	41	6.40312	Intertidal	4	12	E1	April	St	Low
12.JPG	Hard Coral	Galaxea	Massive	D	37	6.08276	Intertidal	4	12	Covered by turf	April	St	Low
12.JPG	Substratum	Sand/Rubble			22	4.69042	Intertidal	4	12		April
13.JPG	Hard Coral	Acropora	Branching	M	2	1.41421	Intertidal	4	13	E4	April	C	High
13.JPG	Hard Coral	Galaxea	Massive	S	12	3.4641	Intertidal	4	13	E1	April	St	Low
13.JPG	Hard Coral	Galaxea	Massive	D	10	3.16228	Intertidal	4	13	Covered by turf	April	St	Low
13.JPG	Hard Coral	Unknown	Encrusting	S	2	1.41421	Intertidal	4	13	E1	April
13.JPG	Substratum	Sand/Rubble			74	8.60233	Intertidal	4	13		April
14.JPG	Hard Coral	Acropora	Branching	UB	59	7.68115	Intertidal	4	14	E6	April	C	High
14.JPG	Substratum	Sand/Rubble			41	6.40312	Intertidal	4	14		April
15.png	Hard Coral	Acropora	Branching	UB	67	8.18535	Intertidal	4	15	E5	April	C	High
15.png	Hard Coral	Acropora	Branching	M	1	1	Intertidal	4	15	E4	April	C	High
15.png	Hard Coral	Goniopora	Massive	S	1	1	Intertidal	4	15	E1	April
15.png	Hard Coral	Goniopora	Massive	D	4	2	Intertidal	4	15	Dead	April
15.png	Substratum	Sand/Rubble			27	5.19615	Intertidal	4	15		April
16.png	Hard Coral	Acropora	Branching	UB	2	1.41421	Intertidal	4	16	E5	April	C	High
16.png	Hard Coral	Goniopora	Massive	S	4	2	Intertidal	4	16	E1	April
16.png	Hard Coral	Goniopora	Massive	D	3	1.73205	Intertidal	4	16	Dead	April
16.png	Soft coral	Soft coral			1	1	Intertidal	4	16		April
16.png	Substratum	Sand/Rubble			90	9.48683	Intertidal	4	16		April
17.png	Hard Coral	Acropora	Branching	UB	15	3.87298	Intertidal	4	17	E5	April	C	High
17.png	Substratum	Sand/Rubble			85	9.21954	Intertidal	4	17		April
18.png	Substratum	Sand/Rubble			100	10	Intertidal	4	18		April
19.png	Hard Coral	Acropora	Branching	UB	22	4.69042	Intertidal	4	19	E5	April	C	High
19.png	Seaweed	Brown seaweed			3	1.73205	Intertidal	4	19		April
19.png	Substratum	Sand/Rubble			75	8.66025	Intertidal	4	19		April
20.png	Hard Coral	Acropora	Branching	M	37	6.08276	Intertidal	4	20	E5	April	C	High
20.png	Soft coral	Soft coral			1	1	Intertidal	4	20		April
20.png	Substratum	Sand/Rubble			62	7.87401	Intertidal	4	20		April
21.png	Hard Coral	Acropora	Branching	UB	30	5.47723	Intertidal	4	21	E5	April	C	High
21.png	Hard Coral	Porites	Massive	S	4	2	Intertidal	4	21	E1	April		High
21.png	Substratum	Sand/Rubble			66	8.12404	Intertidal	4	21		April
22.png	Hard Coral	Acropora	Branching	UB	2	1.41421	Intertidal	4	22	E5	April	C	High
22.png	Hard Coral	Acropora	Branching	S	4	2	Intertidal	4	22	E3	April	C	High
22.png	Hard Coral	Porites	Massive	S	3	1.73205	Intertidal	4	22	E1	April		High
22.png	Soft coral	Soft coral			2	1.41421	Intertidal	4	22		April
22.png	Seaweed	Green seaweed			1	1	Intertidal	4	22		April
22.png	Substratum	Sand/Rubble			88	9.38083	Intertidal	4	22		April
23.png	Hard Coral	Acropora	Branching	M	4	2	Intertidal	4	23	E5	April	C	High
23.png	Hard Coral	Acropora	Branching	M	37	6.08276	Intertidal	4	23	E5	April	C	High
23.png	Hard Coral	Porites	Massive	S	1	1	Intertidal	4	23	E1	April		High
23.png	Seaweed	Green seaweed			4	2	Intertidal	4	23		April
23.png	Substratum	Sand/Rubble			54	7.34847	Intertidal	4	23		April
24.png	Soft coral	Soft coral			1	1	Intertidal	4	24		April
24.png	Substratum	Sand/Rubble			99	9.94987	Intertidal	4	24		April
25.png	Seaweed	Brown seaweed			34	5.83095	Intertidal	4	25		April
25.png	Substratum	Sand/Rubble			66	8.12404	Intertidal	4	25		April
26.JPG	Substratum	Sand/Rubble			100	10	Intertidal	4	26		April
27.JPG	Hard Coral	Goniopora	Massive	S	5	2.23607	Intertidal	4	27	E1	April
27.JPG	Hard Coral	Goniopora	Massive	D	14	3.74166	Intertidal	4	27	Covered by turf	April
27.JPG	Hard Coral	Unknown	Branching	S	17	4.12311	Intertidal	4	27	E1	April
27.JPG	Substratum	Sand/Rubble			64	8	Intertidal	4	27		April
28.JPG	Hard Coral	Goniopora	Massive	S	10	3.16228	Intertidal	4	28	E1	April
28.JPG	Hard Coral	Goniopora	Massive	D	20	4.47214	Intertidal	4	28	Covered by turf	April
28.JPG	Substratum	Sand/Rubble			70	8.3666	Intertidal	4	28		April
29.JPG	Hard Coral	Goniopora	Massive	S	23	4.79583	Intertidal	4	29	E1	April
29.JPG	Hard Coral	Goniopora	Massive	D	23	4.79583	Intertidal	4	29	Covered by turf	April
29.JPG	Seaweed	Green seaweed			3	1.73205	Intertidal	4	29		April
29.JPG	Substratum	Sand/Rubble			51	7.14143	Intertidal	4	29		April
30.JPG	Hard Coral	Acropora	Branching	UB	1	1	Intertidal	4	30	E5	April	C	High
30.JPG	Hard Coral	Goniopora	Massive	S	12	3.4641	Intertidal	4	30	E1	April
30.JPG	Hard Coral	Goniopora	Massive	D	10	3.16228	Intertidal	4	30	Covered by turf	April
30.JPG	Soft coral	Soft coral			5	2.23607	Intertidal	4	30		April
30.JPG	Seaweed	Green seaweed			1	1	Intertidal	4	30		April
30.JPG	Substratum	Sand/Rubble			71	8.42615	Intertidal	4	30		April
31.JPG	Hard Coral	Acropora	Branching	M	22	4.69042	Intertidal	4	31	E4	April	C	High
31.JPG	Hard Coral	Goniopora	Massive	S	4	2	Intertidal	4	31	E1	April
31.JPG	Hard Coral	Goniopora	Massive	D	9	3	Intertidal	4	31	Covered by turf	April
31.JPG	Soft coral	Soft coral			1	1	Intertidal	4	31		April
31.JPG	Seaweed	Green seaweed			1	1	Intertidal	4	31		April
31.JPG	Substratum	Sand/Rubble			63	7.93725	Intertidal	4	31		April
1.png	Hard Coral	Acropora	Branching	UB	1	1	Intertidal	5	1	E5	April	C	High
1.png	Hard Coral	Dipsastraea	Massive	D	3	1.73205	Intertidal	5	1	E1	April	St	Low
1.png	Substratum	Sand/Rubble			96	9.79796	Intertidal	5	1		April
2.JPG	Substratum	Sand/Rubble			100	10	Intertidal	5	2		April
3.png	Hard Coral	Dipsastraea	Massive	UB	1	1	Intertidal	5	3	E5	April	St	Low
3.png	Hard Coral	Dipsastraea	Massive	S	1	1	Intertidal	5	3	E1	April	St	Low
3.png	Hard Coral	Pavona	Massive	S	14	3.74166	Intertidal	5	3	E1	April		High
3.png	Substratum	Sand/Rubble			84	9.16515	Intertidal	5	3		April
4.png	Hard Coral	Favites	Encrusting	S	2	1.41421	Intertidal	5	4	E1	April	St	High
4.png	Hard Coral	Unknown	Branching	S	26	5.09902	Intertidal	5	4	E1	April
4.png	Soft coral	Soft coral			5	2.23607	Intertidal	5	4		April
4.png	Substratum	Sand/Rubble			67	8.18535	Intertidal	5	4		April
5.png	Hard Coral	Pocillopora	Branching	M	1	1	Intertidal	5	5	C2	April	W	Low
5.png	Hard Coral	Dipsastraea	Massive	UB	1	1	Intertidal	5	5	E5	April	St	Low
5.png	Soft coral	Soft coral			7	2.64575	Intertidal	5	5		April
5.png	Substratum	Sand/Rubble			91	9.53939	Intertidal	5	5		April
6.JPG	Substratum	Sand/Rubble			100	10	Intertidal	5	6		April
7e.JPG	Hard Coral	Acropora	Branching	S	22	4.69042	Intertidal	5	7	E1	April	C	High
7e.JPG	Hard Coral	Acropora	Branching	D	4	2	Intertidal	5	7	Covered by turf	April	C	High
7e.JPG	Substratum	Sand/Rubble			74	8.60233	Intertidal	5	7		April
8.JPG	Hard Coral	Acropora	Branching	S	31	5.56776	Intertidal	5	8	E2	April	C	High
8.JPG	Hard Coral	Porites	Massive	M	22	4.69042	Intertidal	5	8	E3	April		High
8.JPG	Soft coral	Soft coral			5	2.23607	Intertidal	5	8		April
8.JPG	Substratum	Sand/Rubble			42	6.48074	Intertidal	5	8		April
9.png	Hard Coral	Acropora	Branching	S	37	6.08276	Intertidal	5	9	E1	April	C	High
9.png	Hard Coral	Acropora	Branching	D	11	3.31662	Intertidal	5	9	Covered by turf	April	C	High
9.png	Soft coral	Soft coral			7	2.64575	Intertidal	5	9		April
9.png	Substratum	Sand/Rubble			45	6.7082	Intertidal	5	9		April
10.png	Hard Coral	Acropora	Branching	M	10	3.16228	Intertidal	5	10	E4	April	C	High
10.png	Substratum	Sand/Rubble			90	9.48683	Intertidal	5	10		April
11.JPG	Substratum	Sand/Rubble			100	10	Intertidal	5	11		April
12.png	Hard Coral	Acropora	Branching	D	3	1.73205	Intertidal	5	12	Covered by turf	April	C	High
12.png	Hard Coral	Trachyphyllia	Massive	S	2	1.41421	Intertidal	5	12	D2	April
12.png	Substratum	Sand/Rubble			95	9.74679	Intertidal	5	12		April
13.png	Hard Coral	Acropora	Branching	S	9	3	Intertidal	5	13	E1	April	C	High
13.png	Hard Coral	Lobophyllia	Massive	D	4	2	Intertidal	5	13	Dead	April	St	Low
13.png	Substratum	Sand/Rubble			87	9.32738	Intertidal	5	13		April
14.png	Hard Coral	Lobophyllia	Massive	S	12	3.4641	Intertidal	5	14	E1	April	St	Low
14.png	Substratum	Sand/Rubble			88	9.38083	Intertidal	5	14		April
15.png	Hard Coral	Porites	Massive	UB	27	5.19615	Intertidal	5	15	E4	April		High
15.png	Soft coral	Soft coral		UB	5	2.23607	Intertidal	5	15	E4	April
15.png	Substratum	Sand/Rubble			68	8.24621	Intertidal	5	15		April
16.JPG	Hard Coral	Favites	Encrusting	S	1	1	Intertidal	5	16	E1	April	St	High
16.JPG	Hard Coral	Porites	Massive	UB	25	5	Intertidal	5	16	E4	April		High
16.JPG	Hard Coral	Porites	Massive	S	3	1.73205	Intertidal	5	16	E2	April		High
16.JPG	Hard Coral	Dipsastraea	Massive	S	1	1	Intertidal	5	16	E3	April	St	Low
16.JPG	Soft coral	Soft coral		UB	21	4.58258	Intertidal	5	16	E4	April
16.JPG	Substratum	Sand/Rubble			49	7	Intertidal	5	16		April
17.png	Hard Coral	Porites	Massive	M	3	1.73205	Intertidal	5	17	E6	April		High
17.png	Hard Coral	Pavona	Massive	M	2	1.41421	Intertidal	5	17	E4	April		High
17.png	Substratum	Sand/Rubble			95	9.74679	Intertidal	5	17		April
18.png	Hard Coral	Acropora	Branching	UB	6	2.44949	Intertidal	5	18	E5	April	C	High
18.png	Substratum	Sand/Rubble			94	9.69536	Intertidal	5	18		April
19.png	Substratum	Sand/Rubble			100	10	Intertidal	5	19		April
20.png	Hard Coral	Porites	Massive	S	2	1.41421	Intertidal	5	20	E2	April		High
20.png	Substratum	Sand/Rubble			98	9.89949	Intertidal	5	20		April
21.png	Seaweed	CCA		UB	1	1	Intertidal	5			April
21.png	Substratum	Sand/Rubble			99	9.94987	Intertidal	5			April
22.png	Substratum	Sand/Rubble			100	10	Intertidal	5	22		April
23.png	Substratum	Sand/Rubble			100	10	Intertidal	5	23		April
24.JPG	Hard Coral	Acropora	Branching	S	4	2	Intertidal	5	24	E3	April	C	High
24.JPG	Hard Coral	Porites	Massive	S	2	1.41421	Intertidal	5	24	D2	April		High
24.JPG	Hard Coral	Goniopora	Massive	S	2	1.41421	Intertidal	5	24	E1	April
24.JPG	Substratum	Sand/Rubble			92	9.59166	Intertidal	5	24		April
25.png	Hard Coral	Acropora	Branching	M	27	5.19615	Intertidal	5	25	E4	April	C	High
25.png	Hard Coral	Porites	Massive	S	7	2.64575	Intertidal	5	25	D2	April		High
25.png	Hard Coral	Goniopora	Massive	S	2	1.41421	Intertidal	5	25	E1	April
25.png	Soft coral	Soft coral			4	2	Intertidal	5	25		April
25.png	Seaweed	Green seaweed			8	2.82843	Intertidal	5	25		April
25.png	Substratum	Sand/Rubble			52	7.2111	Intertidal	5	25		April
26.png	Hard Coral	Acropora	Branching	M	23	4.79583	Intertidal	5	26	E4	April	C	High
26.png	Substratum	Sand/Rubble			77	8.77496	Intertidal	5	26		April
27.png	Seaweed	Green seaweed			6	2.44949	Intertidal	5	27		April
27.png	Substratum	Sand/Rubble			94	9.69536	Intertidal	5	27		April
28.png	Hard Coral	Acropora	Branching	S	6	2.44949	Intertidal	5	28	E3	April	C	High
28.png	Substratum	Sand/Rubble			94	9.69536	Intertidal	5	28		April
29.png	Hard Coral	Acropora	Branching	S	11	3.31662	Intertidal	5	29	E2	April	C	High
29.png	Seaweed	Green seaweed			3	1.73205	Intertidal	5	29		April
29.png	Substratum	Sand/Rubble			86	9.27362	Intertidal	5	29		April
30.JPG	Hard Coral	Acropora	Branching	S	5	2.23607	Intertidal	5	30	E3	April	C	High
30.JPG	Hard Coral	Porites	Massive	S	1	1	Intertidal	5	30	NA	April		High
30.JPG	Hard Coral	Platygyra	Massive	S	11	3.31662	Intertidal	5	30	E1	April	St	High
30.JPG	Hard Coral	Platygyra	Massive	D	2	1.41421	Intertidal	5	30	Dead	April	St	High
30.JPG	Seaweed	Green seaweed			3	1.73205	Intertidal	5	30		April
30.JPG	Substratum	Sand/Rubble			78	8.83176	Intertidal	5	30		April
1.JPG	Hard Coral	Porites	Branching	M	1	1	Intertidal	6	1	E5	April		High
1.JPG	Hard Coral	Pavona	Massive	S	1	1	Intertidal	6	1	E1	April		High
1.JPG	Soft coral	Soft coral			2	1.41421	Intertidal	6	1		April
1.JPG	Substratum	Sand/Rubble			96	9.79796	Intertidal	6	1		April
2.JPG	Hard Coral	Acropora	Branching	UB	8	2.82843	Intertidal	6	2	E4	April	C	High
2.JPG	Soft coral	Soft coral			4	2	Intertidal	6	2		April
2.JPG	Substratum	Sand/Rubble			88	9.38083	Intertidal	6	2		April
3.JPG	Hard Coral	Porites	Massive	S	3	1.73205	Intertidal	6	3	E1	April		High
3.JPG	Substratum	Sand/Rubble			97	9.84886	Intertidal	6	3		April
4.JPG	Hard Coral	Porites	Massive	S	6	2.44949	Intertidal	6	4	E1	April		High
4.JPG	Soft coral	Soft coral			1	1	Intertidal	6	4		April
4.JPG	Substratum	Sand/Rubble			93	9.64365	Intertidal	6	4		April
5.JPG	Hard Coral	Acropora	Branching	D	23	4.79583	Intertidal	6	5	Dead	April	C	High
5.JPG	Hard Coral	Dipsastraea	Massive	D	2	1.41421	Intertidal	6	5	Dead	April	St	Low
5.JPG	Substratum	Sand/Rubble			75	8.66025	Intertidal	6	5		April
6.JPG	Hard Coral	Acropora	Branching	S	21	4.58258	Intertidal	6	6	E1	April	C	High
6.JPG	Hard Coral	Acropora	Branching	D	20	4.47214	Intertidal	6	6	Covered by turf	April	C	High
6.JPG	Soft coral	Soft coral			1	1	Intertidal	6	6		April
6.JPG	Substratum	Sand/Rubble			58	7.61577	Intertidal	6	6		April
7.JPG	Soft coral	Soft coral			2	1.41421	Intertidal	6	7		April
7.JPG	Seaweed	Brown seaweed			9	3	Intertidal	6	7		April
7.JPG	Substratum	Sand/Rubble			89	9.43398	Intertidal	6	7		April
8.JPG	Hard Coral	Porites	Massive	UB	1	1	Intertidal	6	8	E4	April		High
8.JPG	Hard Coral	Porites	Massive	UB	6	2.44949	Intertidal	6	8	NA	April		High
8.JPG	Hard Coral	Unknown	Branching	S	1	1	Intertidal	6	8	E1	April
8.JPG	Substratum	Sand/Rubble			92	9.59166	Intertidal	6	8		April
9.JPG	Substratum	Sand/Rubble			100	10	Intertidal	6	9		April
10.JPG	Hard Coral	Acropora	Branching	M	2	1.41421	Intertidal	6	10	E4	April	C	High
10.JPG	Hard Coral	Acropora	Branching	S	3	1.73205	Intertidal	6	10	E1	April	C	High
10.JPG	Substratum	Sand/Rubble			95	9.74679	Intertidal	6	10		April
11.JPG	Hard Coral	Acropora	Branching	S	20	4.47214	Intertidal	6	11	E1	April	C	High
11.JPG	Hard Coral	Unknown	Massive	S	3	1.73205	Intertidal	6	11	E3	April
11.JPG	Substratum	Sand/Rubble			77	8.77496	Intertidal	6	11		April
12.JPG	Substratum	Sand/Rubble			100	10	Intertidal	6	12		April
13.JPG	Hard Coral	Acropora	Branching	S	51	7.14143	Intertidal	6	13	E1	April	C	High
13.JPG	Hard Coral	Acropora	Branching	D	29	5.38516	Intertidal	6	13	Dead	April	C	High
13.JPG	Substratum	Sand/Rubble			20	4.47214	Intertidal	6	13		April
14.JPG	Hard Coral	Acropora	Branching	S	62	7.87401	Intertidal	6	14	E1	April	C	High
14.JPG	Substratum	Sand/Rubble			38	6.16441	Intertidal	6	14		April
15.JPG	Hard Coral	Acropora	Branching	S	4	2	Intertidal	6	15	E1	April	C	High
15.JPG	Substratum	Sand/Rubble			96	9.79796	Intertidal	6	15		April
16.JPG	Hard Coral	Acropora	Branching	UB	6	2.44949	Intertidal	6	16	E4	April	C	High
16.JPG	Hard Coral	Acropora	Branching	D	6	2.44949	Intertidal	6	16	Covered by turf	April	C	High
16.JPG	Substratum	Sand/Rubble			88	9.38083	Intertidal	6	16		April
17.JPG	Hard Coral	Porites	Massive	S	1	1	Intertidal	6	17	D2	April		High
17.JPG	Substratum	Sand/Rubble			99	9.94987	Intertidal	6	17		April
18.JPG	Hard Coral	Acropora	Branching	UB	1	1	Intertidal	6	18	E4	April	C	High
18.JPG	Hard Coral	Acropora	Branching	D	6	2.44949	Intertidal	6	18	Covered by turf	April	C	High
18.JPG	Substratum	Sand/Rubble			93	9.64365	Intertidal	6	18		April
19.JPG	Substratum	Sand/Rubble			100	10	Intertidal	6	19		April
20.JPG	Hard Coral	Acropora	Branching	S	7	2.64575	Intertidal	6	20	E1	April	C	High
20.JPG	Hard Coral	Dipsastraea	Massive	D	2	1.41421	Intertidal	6	20	Dead	April	St	Low
20.JPG	Substratum	Sand/Rubble			91	9.53939	Intertidal	6	20		April
21.JPG	Hard Coral	Acropora	Branching	S	8	2.82843	Intertidal	6	21	E2	April	C	High
21.JPG	Substratum	Sand/Rubble			92	9.59166	Intertidal	6	21		April
22.JPG	Substratum	Sand/Rubble			100	10	Intertidal	6	22		April
23.JPG	Substratum	Sand/Rubble			100	10	Intertidal	6	23		April
24.JPG	Substratum	Sand/Rubble			100	10	Intertidal	6	24		April
25.JPG	Hard Coral	Acropora	Branching	M	13	3.60555	Intertidal	6	25	E3	April	C	High
25.JPG	Hard Coral	Turbinaria	Plating	UB	3	1.73205	Intertidal	6	25	E4	April		Low
25.JPG	Hard Coral	Unknown	Massive	M	1	1	Intertidal	6	25	D2	April
25.JPG	Substratum	Sand/Rubble			83	9.11043	Intertidal	6	25		April
1.JPG	Hard Coral	Dipsastraea	Massive	UB	2	1.41421	Subtidal	1	1	E4	April	St	Low
1.JPG	Seaweed	Brown seaweed			36	6	Subtidal	1	1		April
1.JPG	Substratum	Sand/Rubble			62	7.87401	Subtidal	1	1		April
2.JPG	Hard Coral	Seriatopora	Branching	S	2	1.41421	Subtidal	1	2	E1	April	W	Low
2.JPG	Soft coral	Soft coral			4	2	Subtidal	1	2		April
2.JPG	Seaweed	Brown seaweed			18	4.24264	Subtidal	1	2		April
2.JPG	Substratum	Sand/Rubble			76	8.7178	Subtidal	1	2		April
4.JPG	Substratum	Sand/Rubble			100	10	Subtidal	1	3		April
5.JPG	Substratum	Sand/Rubble			100	10	Subtidal	1	4		April
7.JPG	Hard Coral	Acropora	Branching	S	36	6	Subtidal	1	5	E2	April	C	High
7.JPG	Substratum	Sand/Rubble			64	8	Subtidal	1	5		April
8.JPG	Hard Coral	Acropora	Branching	S	58	7.61577	Subtidal	1	6	E2	April	C	High
8.JPG	Hard Coral	Acropora	Branching	D	4	2	Subtidal	1	6	Dead	April	C	High
8.JPG	Hard Coral	Porites	Massive	UB	7	2.64575	Subtidal	1	6	E4	April		High
8.JPG	Substratum	Sand/Rubble			31	5.56776	Subtidal	1	6		April
9.JPG	Hard Coral	Acropora	Branching	S	17	4.12311	Subtidal	1	7	E2	April	C	High
9.JPG	Hard Coral	Porites	Massive	UB	13	3.60555	Subtidal	1	7	E4	April		High
9.JPG	Hard Coral	Fungia	Free	UB	4	2	Subtidal	1	7	E4	April	St	Low
9.JPG	Substratum	Sand/Rubble			66	8.12404	Subtidal	1	7		April
10.JPG	Hard Coral	Fungia	Free	UB	7	2.64575	Subtidal	1	8	E4	April	St	Low
10.JPG	Substratum	Sand/Rubble			93	9.64365	Subtidal	1	8		April
11.JPG	Substratum	Sand/Rubble			100	10	Subtidal	1	9		April
12.JPG	Hard Coral	Acropora	Branching	S	50	7.07107	Subtidal	1	10	E2	April	C	High
12.JPG	Substratum	Sand/Rubble			50	7.07107	Subtidal	1	10		April
13.JPG	Hard Coral	Acropora	Branching	S	92	9.59166	Subtidal	1	11	E2	April	C	High
13.JPG	Substratum	Sand/Rubble			8	2.82843	Subtidal	1	11		April
14.JPG	Hard Coral	Acropora	Branching	S	100	10	Subtidal	1	12	E2	April	C	High
15.JPG	Hard Coral	Acropora	Branching	S	100	10	Subtidal	1	13	E2	April	C	High
16.JPG	Hard Coral	Acropora	Branching	S	100	10	Subtidal	1	14	E2	April	C	High
17.JPG	Hard Coral	Acropora	Branching	S	63	7.93725	Subtidal	1	15	E2	April	C	High
17.JPG	Substratum	Sand/Rubble			37	6.08276	Subtidal	1	15		April
18.png	Hard Coral	Acropora	Branching	S	8	2.82843	Subtidal	1	16	E2	April	C	High
18.png	Hard Coral	Porites	Massive	M	6	2.44949	Subtidal	1	16	E5	April		High
18.png	Substratum	Sand/Rubble			86	9.27362	Subtidal	1	16		April
19.JPG	Hard Coral	Acropora	Branching	S	2	1.41421	Subtidal	1	17	E2	April	C	High
19.JPG	Hard Coral	Dipsastraea	Massive	S	1	1	Subtidal	1	17	D2	April	St	Low
19.JPG	Hard Coral	Lobophyllia	Massive	S	2	1.41421	Subtidal	1	17	E3	April	St	Low
19.JPG	Hard Coral	Pavona	Massive	S	2	1.41421	Subtidal	1	17	E2	April		High
19.JPG	Soft coral	Soft coral		S	1	1	Subtidal	1	17	E3	April
19.JPG	Substratum	Sand/Rubble			92	9.59166	Subtidal	1	17		April
21.png	Hard Coral	Acropora	Branching	S	2	1.41421	Subtidal	1	18	B2	April	C	High
21.png	Hard Coral	Porites	Massive	UB	13	3.60555	Subtidal	1	18	NA	April		High
21.png	Hard Coral	Platygyra	Encrusting	UB	3	1.73205	Subtidal	1	18	E4	April	St	High
21.png	Substratum	Sand/Rubble			82	9.05539	Subtidal	1	18		April
22.JPG	Hard Coral	Porites	Massive	UB	4	2	Subtidal	1	19	NA	April		High
22.JPG	Soft coral	Soft coral		UB	10	3.16228	Subtidal	1	19	E4	April
22.JPG	Substratum	Sand/Rubble			86	9.27362	Subtidal	1	19		April
23.JPG	Hard Coral	Acropora	Branching	S	10	3.16228	Subtidal	1	20	E2	April	C	High
23.JPG	Substratum	Sand/Rubble			90	9.48683	Subtidal	1	20		April
24.JPG	Hard Coral	Acropora	Branching	S	59	7.68115	Subtidal	1	21	E2	April	C	High
24.JPG	Substratum	Sand/Rubble			41	6.40312	Subtidal	1	21		April
25.JPG	Hard Coral	Acropora	Branching	S	14	3.74166	Subtidal	1	22	E2	April	C	High
25.JPG	Hard Coral	Favites	Encrusting	S	2	1.41421	Subtidal	1	22	E2	April	St	High
25.JPG	Substratum	Sand/Rubble			84	9.16515	Subtidal	1	22		April
26.JPG	Soft coral	Soft coral		S	5	2.23607	Subtidal	1	23	E2	April
26.JPG	Substratum	Sand/Rubble			95	9.74679	Subtidal	1	23		April
27.JPG	Hard Coral	Favites	Encrusting	UB	1	1	Subtidal	1	24	E4	April	St	High
27.JPG	Hard Coral	Porites	Massive	M	3	1.73205	Subtidal	1	24	E5	April		High
27.JPG	Substratum	Sand/Rubble			96	9.79796	Subtidal	1	24		April
28.JPG	Hard Coral	Acropora	Branching	S	1	1	Subtidal	1	25	E2	April	C	High
28.JPG	Hard Coral	Pocillopora	Branching	UB	2	1.41421	Subtidal	1	25	NA	April	W	Low
28.JPG	Hard Coral	Pocillopora	Branching	S	26	5.09902	Subtidal	1	25	C4	April	W	Low
28.JPG	Hard Coral	Favites	Encrusting	S	2	1.41421	Subtidal	1	25	E2	April	St	High
28.JPG	Soft coral	Soft coral		UB	7	2.64575	Subtidal	1	25	D3	April
28.JPG	Substratum	Sand/Rubble			62	7.87401	Subtidal	1	25		April
29.JPG	Hard Coral	Acropora	Branching	S	55	7.4162	Subtidal	1	26	E2	April	C	High
29.JPG	Substratum	Sand/Rubble			45	6.7082	Subtidal	1	26		April
30.JPG	Hard Coral	Acropora	Branching	S	22	4.69042	Subtidal	1	27	E2	April	C	High
30.JPG	Hard Coral	Fungia	Free	UB	3	1.73205	Subtidal	1	27	E4	April	St	Low
30.JPG	Substratum	Sand/Rubble			75	8.66025	Subtidal	1	27		April
31.JPG	Hard Coral	Porites	Massive	UB	3	1.73205	Subtidal	1	28	E4	April		High
31.JPG	Hard Coral	Porites	Massive	S	1	1	Subtidal	1	28	C2	April		High
31.JPG	Hard Coral	Dipsastraea	Massive	M	1	1	Subtidal	1	28	E3	April	St	Low
31.JPG	Soft coral	Soft coral		UB	3	1.73205	Subtidal	1	28	E4	April
31.JPG	Substratum	Sand/Rubble			92	9.59166	Subtidal	1	28		April
32.JPG	Hard Coral	Acropora	Branching	S	28	5.2915	Subtidal	1	29	E2	April	C	High
32.JPG	Hard Coral	Acropora	Branching	D	18	4.24264	Subtidal	1	29	Dead	April	C	High
32.JPG	Hard Coral	Porites	Massive	S	5	2.23607	Subtidal	1	29	C2	April		High
32.JPG	Substratum	Sand/Rubble			49	7	Subtidal	1	29		April
33.png	Hard Coral	Acropora	Branching	S	22	4.69042	Subtidal	1	30	E1	April	C	High
33.png	Hard Coral	Acropora	Branching	D	18	4.24264	Subtidal	1	30	Turf	April	C	High
33.png	Soft coral	Soft coral			2	1.41421	Subtidal	1	30	E3	April
33.png	Substratum	Sand/Rubble			58	7.61577	Subtidal	1	30		April
1.png	Hard Coral	Acropora	Branching	S	63	7.93725	Subtidal	2	1	E1	April	C	High
1.png	Hard Coral	Acropora	Branching	D	7	2.64575	Subtidal	2	1	Dead	April	C	High
1.png	Substratum	Sand/Rubble			30	5.47723	Subtidal	2	1		April
2.png	Hard Coral	Acropora	Branching	UB	1	1	Subtidal	2	2	E4	April	C	High
2.png	Hard Coral	Acropora	Branching	S	16	4	Subtidal	2	2	E1	April	C	High
2.png	Hard Coral	Acropora	Branching	D	11	3.31662	Subtidal	2	2	Dead	April	C	High
2.png	Soft coral	Soft coral			2	1.41421	Subtidal	2	2		April
2.png	Substratum	Sand/Rubble			70	8.3666	Subtidal	2	2		April
3.png	Hard Coral	Acropora	Branching	S	3	1.73205	Subtidal	2	3	E1	April	C	High
3.png	Hard Coral	Acropora	Branching	D	6	2.44949	Subtidal	2	3	Dead	April	C	High
3.png	Substratum	Sand/Rubble			91	9.53939	Subtidal	2	3		April
4.png	Hard Coral	Acropora	Branching	S	12	3.4641	Subtidal	2	4	E2	April	C	High
4.png	Hard Coral	Acropora	Branching	D	3	1.73205	Subtidal	2	4	Dead	April	C	High
4.png	Hard Coral	Favites	Encrusting	D	4	2	Subtidal	2	4	Turf	April	St	High
4.png	Hard Coral	Porites	Massive	D	3	1.73205	Subtidal	2	4	Turf	April		High
4.png	Substratum	Sand/Rubble			78	8.83176	Subtidal	2	4		April
5.png	Hard Coral	Acropora	Branching	UB	52	7.2111	Subtidal	2	5	E5	April	C	High
5.png	Hard Coral	Acropora	Plating	S	6	2.44949	Subtidal	2	5	E2	April	C	High
5.png	Hard Coral	Acropora	Branching	S	13	3.60555	Subtidal	2	5	E1	April	C	High
5.png	Hard Coral	Acropora	Branching	D	6	2.44949	Subtidal	2	5	Turf	April	C	High
5.png	Substratum	Sand/Rubble			23	4.79583	Subtidal	2	5		April
6.JPG	Hard Coral	Acropora	Branching	UB	8	2.82843	Subtidal	2	6	E5	April	C	High
6.JPG	Hard Coral	Acropora	Branching	M	34	5.83095	Subtidal	2	6	E4	April	C	High
6.JPG	Hard Coral	Acropora	Branching	S	4	2	Subtidal	2	6	E2	April	C	High
6.JPG	Hard Coral	Acropora	Branching	D	20	4.47214	Subtidal	2	6	Turf	April	C	High
6.JPG	Substratum	Sand/Rubble			34	5.83095	Subtidal	2	6		April
7.JPG	Hard Coral	Acropora	Branching	UB	27	5.19615	Subtidal	2	7	E5	April	C	High
7.JPG	Hard Coral	Acropora	Branching	S	45	6.7082	Subtidal	2	7	E2	April	C	High
7.JPG	Substratum	Sand/Rubble			28	5.2915	Subtidal	2	7		April
8.JPG	Hard Coral	Acropora	Branching	S	93	9.64365	Subtidal	2	8	E2	April	C	High
8.JPG	Substratum	Sand/Rubble			7	2.64575	Subtidal	2	8		April
9.JPG	Hard Coral	Acropora	Branching	S	80	8.94427	Subtidal	2	9	E2	April	C	High
9.JPG	Hard Coral	Acropora	Branching	D	20	4.47214	Subtidal	2	9	Turf	April	C	High
10.JPG	Hard Coral	Acropora	Branching	UB	2	1.41421	Subtidal	2	10	E6	April	C	High
10.JPG	Hard Coral	Acropora	Branching	S	96	9.79796	Subtidal	2	10	E2	April	C	High
10.JPG	Hard Coral	Acropora	Branching	D	2	1.41421	Subtidal	2	10	Turf	April	C	High
11.JPG	Hard Coral	Acropora	Branching	UB	3	1.73205	Subtidal	2	11	E6	April	C	High
11.JPG	Hard Coral	Acropora	Branching	S	81	9	Subtidal	2	11	E2	April	C	High
11.JPG	Hard Coral	Acropora	Branching	D	15	3.87298	Subtidal	2	11	Turf	April	C	High
11.JPG	Substratum	Sand/Rubble			1	1	Subtidal	2	11		April
12.JPG	Hard Coral	Acropora	Branching	S	29	5.38516	Subtidal	2	12	E2	April	C	High
12.JPG	Hard Coral	Acropora	Branching	D	26	5.09902	Subtidal	2	12	Turf	April	C	High
12.JPG	Substratum	Sand/Rubble			45	6.7082	Subtidal	2	12		April
13.JPG	Hard Coral	Acropora	Branching	UB	1	1	Subtidal	2	13	E6	April	C	High
13.JPG	Hard Coral	Acropora	Branching	M	30	5.47723	Subtidal	2	13	E4	April	C	High
13.JPG	Hard Coral	Acropora	Branching	S	22	4.69042	Subtidal	2	13	E2	April	C	High
13.JPG	Hard Coral	Acropora	Branching	D	9	3	Subtidal	2	13	Turf	April	C	High
13.JPG	Hard Coral	Favites	Encrusting	D	1	1	Subtidal	2	13	Turf	April	St	High
13.JPG	Hard Coral	Porites	Massive	D	2	1.41421	Subtidal	2	13	Dead	April		High
13.JPG	Soft coral	Soft coral			10	3.16228	Subtidal	2	13		April
13.JPG	Substratum	Rock			22	4.69042	Subtidal	2	13		April
13.JPG	Substratum	Sand/Rubble			3	1.73205	Subtidal	2	13		April
14.JPG	Hard Coral	Acropora	Branching	UB	19	4.3589	Subtidal	2	14	E5	April	C	High
14.JPG	Hard Coral	Acropora	Branching	M	2	1.41421	Subtidal	2	14	E3	April	C	High
14.JPG	Hard Coral	Favites	Massive	S	1	1	Subtidal	2	14	E1	April	St	High
14.JPG	Hard Coral	Favites	Massive	D	11	3.31662	Subtidal	2	14	Turf	April	St	High
14.JPG	Hard Coral	Porites	Massive	UB	1	1	Subtidal	2	14	E6	April		High
14.JPG	Hard Coral	Porites	Massive	D	1	1	Subtidal	2	14	Dead	April		High
14.JPG	Soft coral	Soft coral			2	1.41421	Subtidal	2	14		April
14.JPG	Substratum	Rock			56	7.48331	Subtidal	2	14		April
14.JPG	Substratum	Sand/Rubble			7	2.64575	Subtidal	2	14		April
15.JPG	Hard Coral	Acropora	Branching	S	19	4.3589	Subtidal	2	15	E2	April	C	High
15.JPG	Hard Coral	Acropora	Branching	S	36	6	Subtidal	2	15	NA	April	C	High
15.JPG	Hard Coral	Acropora	Branching	D	5	2.23607	Subtidal	2	15	Turf	April	C	High
15.JPG	Hard Coral	Goniopora	Massive	S	1	1	Subtidal	2	15	E1	April
15.JPG	Substratum	Rock			32	5.65685	Subtidal	2	15		April
15.JPG	Substratum	Sand/Rubble			7	2.64575	Subtidal	2	15		April
16.JPG	Hard Coral	Acropora	Branching	S	63	7.93725	Subtidal	2	16	NA	April	C	High
16.JPG	Hard Coral	Acropora	Branching	D	4	2	Subtidal	2	16	Turf	April	C	High
16.JPG	Substratum	Sand/Rubble			33	5.74456	Subtidal	2	16		April
17.JPG	Hard Coral	Acropora	Branching	S	39	6.245	Subtidal	2	17	NA	April	C	High
17.JPG	Hard Coral	Acropora	Branching	D	17	4.12311	Subtidal	2	17	Turf	April	C	High
17.JPG	Hard Coral	Pocillopora	Branching	S	3	1.73205	Subtidal	2	17	C2	April	W	Low
17.JPG	Hard Coral	Pocillopora	Branching	D	4	2	Subtidal	2	17	Turf	April	W	Low
17.JPG	Hard Coral	Favites	Encrusting	S	2	1.41421	Subtidal	2	17	E1	April	St	High
17.JPG	Hard Coral	Favites	Encrusting	D	5	2.23607	Subtidal	2	17	Turf	April	St	High
17.JPG	Hard Coral	Pavona	Massive	S	3	1.73205	Subtidal	2	17	B2	April		High
17.JPG	Substratum	Sand/Rubble			27	5.19615	Subtidal	2	17		April
18.JPG	Hard Coral	Acropora	Branching	S	15	3.87298	Subtidal	2	18	NA	April	C	High
18.JPG	Hard Coral	Acropora	Branching	D	15	3.87298	Subtidal	2	18	Turf	April	C	High
18.JPG	Hard Coral	Favites	Encrusting	S	4	2	Subtidal	2	18	E1	April	St	High
18.JPG	Hard Coral	Favites	Encrusting	D	6	2.44949	Subtidal	2	18	Turf	April	St	High
18.JPG	Substratum	Sand/Rubble			60	7.74597	Subtidal	2	18		April
19.JPG	Hard Coral	Pocillopora	Branching	S	1	1	Subtidal	2	19	C2	April	W	Low
19.JPG	Hard Coral	Dipsastraea	Massive	UB	2	1.41421	Subtidal	2	19	E5	April	St	Low
19.JPG	Hard Coral	Dipsastraea	Massive	D	1	1	Subtidal	2	19	Turf	April	St	Low
19.JPG	Substratum	Sand/Rubble			96	9.79796	Subtidal	2	19		April
20.JPG	Hard Coral	Acropora	Branching	UB	1	1	Subtidal	2	20	E5	April	C	High
20.JPG	Hard Coral	Favites	Encrusting	S	3	1.73205	Subtidal	2	20	E1	April	St	High
20.JPG	Hard Coral	Favites	Encrusting	D	3	1.73205	Subtidal	2	20	Turf	April	St	High
20.JPG	Hard Coral	Dipsastraea	Massive	UB	1	1	Subtidal	2	20	E4	April	St	Low
20.JPG	Substratum	Sand/Rubble			92	9.59166	Subtidal	2	20		April
21.JPG	Hard Coral	Acropora	Branching	S	13	3.60555	Subtidal	2	21	E2	April	C	High
21.JPG	Hard Coral	Acropora	Branching	D	15	3.87298	Subtidal	2	21	Turf	April	C	High
21.JPG	Hard Coral	Montipora	Encrusting	S	1	1	Subtidal	2	21	C2	April		Low
21.JPG	Substratum	Rock			23	4.79583	Subtidal	2	21		April
21.JPG	Substratum	Sand/Rubble			48	6.9282	Subtidal	2	21		April
22.JPG	Hard Coral	Pavona	Massive	UB	3	1.73205	Subtidal	2	22	E5	April		High
22.JPG	Seaweed	Green seaweed			3	1.73205	Subtidal	2	22		April
22.JPG	Substratum	Sand/Rubble			94	9.69536	Subtidal	2	22		April
23.JPG	Hard Coral	Favites	Encrusting	S	2	1.41421	Subtidal	2	23	E1	April	St	High
23.JPG	Hard Coral	Porites	Massive	UB	4	2	Subtidal	2	23	E5	April		High
23.JPG	Substratum	Sand/Rubble			94	9.69536	Subtidal	2	23		April
24.JPG	Hard Coral	Lobophyllia	Massive	S	1	1	Subtidal	2	24	E2	April	St	Low
24.JPG	Hard Coral	Porites	Massive	UB	6	2.44949	Subtidal	2	24	E5	April		High
24.JPG	Hard Coral	Turbinaria	Plating	UB	1	1	Subtidal	2	24	E5	April		Low
24.JPG	Soft coral	Soft coral			1	1	Subtidal	2	24		April
24.JPG	Seaweed	Green seaweed			1	1	Subtidal	2	24		April
24.JPG	Substratum	Sand/Rubble			90	9.48683	Subtidal	2	24		April
25.JPG	Hard Coral	Lobophyllia	Massive	S	5	2.23607	Subtidal	2	25	E2	April	St	Low
25.JPG	Soft coral	Soft coral			5	2.23607	Subtidal	2	25		April
25.JPG	Seaweed	Green seaweed			4	2	Subtidal	2	25		April
25.JPG	Substratum	Sand/Rubble			86	9.27362	Subtidal	2	25		April
26.JPG	Hard Coral	Porites	Massive	S	2	1.41421	Subtidal	2	26	E3	April		High
26.JPG	Hard Coral	Porites	Massive	S	17	4.12311	Subtidal	2	26	E1	April		High
26.JPG	Hard Coral	Dipsastraea	Massive	S	4	2	Subtidal	2	26	E1	April	St	Low
26.JPG	Hard Coral	Lobophyllia	Massive	S	2	1.41421	Subtidal	2	26	E2	April	St	Low
26.JPG	Hard Coral	Lobophyllia	Massive	D	2	1.41421	Subtidal	2	26	Turf	April	St	Low
26.JPG	Soft coral	Soft coral			1	1	Subtidal	2	26		April
26.JPG	Substratum	Sand/Rubble			72	8.48528	Subtidal	2	26		April
27.JPG	Hard Coral	Acropora	Branching	D	4	2	Subtidal	2	27	Turf	April	C	High
27.JPG	Hard Coral	Favites	Encrusting	S	1	1	Subtidal	2	27	E3	April	St	High
27.JPG	Hard Coral	Favites	Encrusting	S	38	6.16441	Subtidal	2	27	E1	April	St	High
27.JPG	Hard Coral	Favites	Encrusting	D	4	2	Subtidal	2	27	Dead	April	St	High
27.JPG	Hard Coral	Porites	Massive	D	2	1.41421	Subtidal	2	27	Turf	April		High
27.JPG	Seaweed	Green seaweed			2	1.41421	Subtidal	2	27		April
27.JPG	Substratum	Sand/Rubble			49	7	Subtidal	2	27		April
28.JPG	Hard Coral	Acropora	Branching	S	6	2.44949	Subtidal	2	28	E2	April	C	High
28.JPG	Hard Coral	Favites	Encrusting	S	9	3	Subtidal	2	28	E1	April	St	High
28.JPG	Hard Coral	Porites	Massive	UB	1	1	Subtidal	2	28	D6	April		High
28.JPG	Hard Coral	Porites	Massive	D	5	2.23607	Subtidal	2	28	Turf	April		High
28.JPG	Soft coral	Soft coral			4	2	Subtidal	2	28		April
28.JPG	Substratum	Sand/Rubble			75	8.66025	Subtidal	2	28		April
29.JPG	Hard Coral	Acropora	Branching	S	2	1.41421	Subtidal	2	29	E2	April	C	High
29.JPG	Hard Coral	Porites	Massive	D	5	2.23607	Subtidal	2	29	Turf	April		High
29.JPG	Hard Coral	Goniopora	Massive	S	4	2	Subtidal	2	29	E1	April
29.JPG	Hard Coral	Goniopora	Massive	D	4	2	Subtidal	2	29	Turf	April
29.JPG	Hard Coral	Dipsastraea	Massive	M	2	1.41421	Subtidal	2	29	E3	April	St	Low
29.JPG	Hard Coral	Lobophyllia	Massive	S	1	1	Subtidal	2	29	E2	April	St	Low
29.JPG	Seaweed	Green seaweed			1	1	Subtidal	2	29		April
29.JPG	Substratum	Sand/Rubble			81	9	Subtidal	2	29		April
30.JPG	Hard Coral	Acropora	Branching	S	5	2.23607	Subtidal	2	30	E2	April	C	High
30.JPG	Soft coral	Soft coral			4	2	Subtidal	2	30		April
30.JPG	Seaweed	Green seaweed			5	2.23607	Subtidal	2	30		April
30.JPG	Substratum	Sand/Rubble			86	9.27362	Subtidal	2	30		April
1.JPG	Hard Coral	Acropora	Branching	M	1	1	Subtidal	3	1	E3	April	C	High
1.JPG	Hard Coral	Acropora	Branching	S	16	4	Subtidal	3	1	E2	April	C	High
1.JPG	Hard Coral	Porites	Massive	UB	1	1	Subtidal	3	1	E5	April		High
1.JPG	Hard Coral	Dipsastraea	Massive	UB	1	1	Subtidal	3	1	E5	April	St	Low
1.JPG	Substratum	Sand/Rubble			81	9	Subtidal	3	1		April
2.png	Hard Coral	Acropora	Branching	S	46	6.78233	Subtidal	3	2	E2	April	C	High
2.png	Hard Coral	Acropora	Branching	D	18	4.24264	Subtidal	3	2	Turf	April	C	High
2.png	Substratum	Sand/Rubble			36	6	Subtidal	3	2		April
3.png	Hard Coral	Acropora	Branching	S	24	4.89898	Subtidal	3	3	E2	April	C	High
3.png	Hard Coral	Acropora	Branching	D	13	3.60555	Subtidal	3	3	Turf	April	C	High
3.png	Hard Coral	Seriatopora	Branching	S	2	1.41421	Subtidal	3	3	E2	April	W	Low
3.png	Substratum	Sand/Rubble			61	7.81025	Subtidal	3	3		April
4.JPG	Hard Coral	Acropora	Branching	S	6	2.44949	Subtidal	3	4	E1	April	C	High
4.JPG	Substratum	Sand/Rubble			94	9.69536	Subtidal	3	4		April
5.JPG	Hard Coral	Acropora	Branching	S	22	4.69042	Subtidal	3	5	E1	April	C	High
5.JPG	Hard Coral	Acropora	Branching	D	25	5	Subtidal	3	5	Turf	April	C	High
5.JPG	Substratum	Sand/Rubble			53	7.28011	Subtidal	3	5		April
6.png	Hard Coral	Acropora	Branching	S	6	2.44949	Subtidal	3	6	E2	April	C	High
6.png	Hard Coral	Acropora	Branching	D	10	3.16228	Subtidal	3	6	Turf	April	C	High
6.png	Soft coral	Soft coral			21	4.58258	Subtidal	3	6		April
6.png	Substratum	Sand/Rubble			63	7.93725	Subtidal	3	6		April
7.png	Hard Coral	Acropora	Plating	S	10	3.16228	Subtidal	3	7	E3	April	C	High
7.png	Hard Coral	Stylophora	Branching	S	1	1	Subtidal	3	7	D2	April	W	Low
7.png	Hard Coral	Montipora	Encrusting	UB	1	1	Subtidal	3	7	E5	April		Low
7.png	Hard Coral	Montipora	Encrusting	S	8	2.82843	Subtidal	3	7	C2	April		Low
7.png	Substratum	Sand/Rubble			80	8.94427	Subtidal	3	7		April
8.JPG	Hard Coral	Acropora	Branching	S	20	4.47214	Subtidal	3	8	E3	April	C	High
8.JPG	Hard Coral	Pocillopora	Branching	S	6	2.44949	Subtidal	3	8	C2	April	W	Low
8.JPG	Hard Coral	Stylophora	Branching	S	1	1	Subtidal	3	8	D1	April	W	Low
8.JPG	Substratum	Sand/Rubble			73	8.544	Subtidal	3	8		April
9.JPG	Hard Coral	Stylophora	Branching	S	5	2.23607	Subtidal	3	9	D1	April	W	Low
9.JPG	Hard Coral	Dipsastraea	Massive	D	2	1.41421	Subtidal	3	9	Dead	April	St	Low
9.JPG	Substratum	Sand/Rubble			93	9.64365	Subtidal	3	9		April
10.png	Hard Coral	Acropora	Branching	UB	4	2	Subtidal	3	10	E5	April	C	High
10.png	Substratum	Sand/Rubble			96	9.79796	Subtidal	3	10		April
11.png	Hard Coral	Montipora	Encrusting	M	5	2.23607	Subtidal	3	11	E4	April		Low
11.png	Substratum	Sand/Rubble			95	9.74679	Subtidal	3	11		April
12.png	Hard Coral	Favites	Encrusting	D	1	1	Subtidal	3	12	Turf	April	St	High
12.png	Hard Coral	Montipora	Encrusting	UB	2	1.41421	Subtidal	3	12	E4	April		Low
12.png	Hard Coral	Dipsastraea	Massive	S	10	3.16228	Subtidal	3	12	E1	April	St	Low
12.png	Substratum	Sand/Rubble			87	9.32738	Subtidal	3	12		April
13.png	Hard Coral	Acropora	Branching	S	13	3.60555	Subtidal	3	13	E1	April	C	High
13.png	Hard Coral	Dipsastraea	Massive	S	4	2	Subtidal	3	13	E1	April	St	Low
13.png	Soft coral	Soft coral			3	1.73205	Subtidal	3	13		April
13.png	Substratum	Sand/Rubble			80	8.94427	Subtidal	3	13		April
14.JPG	Substratum	Sand/Rubble			100	10	Subtidal	3	14		April
15.png	Hard Coral	Acropora	Branching	S	40	6.32456	Subtidal	3	15	E1	April	C	High
15.png	Substratum	Sand/Rubble			60	7.74597	Subtidal	3	15		April
16.png	Hard Coral	Acropora	Branching	S	43	6.55744	Subtidal	3	16	E2	April	C	High
16.png	Hard Coral	Montipora	Encrusting	S	5	2.23607	Subtidal	3	16	E1	April		Low
16.png	Substratum	Sand/Rubble			52	7.2111	Subtidal	3	16		April
17.png	Hard Coral	Montipora	Encrusting	S	4	2	Subtidal	3	17	E1	April		Low
17.png	Substratum	Sand/Rubble			96	9.79796	Subtidal	3	17		April
18.png	Hard Coral	Acropora	Branching	S	7	2.64575	Subtidal	3	18	E2	April	C	High
18.png	Hard Coral	Acropora	Branching	D	4	2	Subtidal	3	18	Turf	April	C	High
18.png	Substratum	Sand/Rubble			89	9.43398	Subtidal	3	18		April
19.png	Hard Coral	Acropora	Branching	S	24	4.89898	Subtidal	3	19	E2	April	C	High
19.png	Hard Coral	Acropora	Branching	D	14	3.74166	Subtidal	3	19	Turf	April	C	High
19.png	Substratum	Sand/Rubble			62	7.87401	Subtidal	3	19		April
20.JPG	Hard Coral	Acropora	Branching	S	53	7.28011	Subtidal	3	20	E2	April	C	High
20.JPG	Hard Coral	Acropora	Branching	D	2	1.41421	Subtidal	3	20	Turf	April	C	High
20.JPG	Substratum	Sand/Rubble			45	6.7082	Subtidal	3	20		April
21.png	Hard Coral	Acropora	Branching	M	25	5	Subtidal	3	21	E4	April	C	High
21.png	Hard Coral	Montipora	Encrusting	D	11	3.31662	Subtidal	3	21	Dead	April		Low
21.png	Hard Coral	Montipora	Encrusting	S	1	1	Subtidal	3	21	C2	April		Low
21.png	Substratum	Sand/Rubble			63	7.93725	Subtidal	3	21		April
22.png	Hard Coral	Acropora	Branching	S	4	2	Subtidal	3	22	E2	April	C	High
22.png	Hard Coral	Favites	Encrusting	D	2	1.41421	Subtidal	3	22	Dead	April	St	High
22.png	Substratum	Sand/Rubble			94	9.69536	Subtidal	3	22		April
23.png	Hard Coral	Acropora	Branching	S	5	2.23607	Subtidal	3	23	E2	April	C	High
23.png	Hard Coral	Turbinaria	Plating	D	11	3.31662	Subtidal	3	23	Turf	April		Low
23.png	Substratum	Sand/Rubble			84	9.16515	Subtidal	3	23		April
25.png	Soft coral	Soft coral			3	1.73205	Subtidal	3	24	E2	April
25.png	Substratum	Sand/Rubble			97	9.84886	Subtidal	3	24		April
26.png	Hard Coral	Acropora	Branching	S	5	2.23607	Subtidal	3	25	E2	April	C	High
26.png	Substratum	Sand/Rubble			95	9.74679	Subtidal	3	25		April
27.png	Hard Coral	Acropora	Branching	S	6	2.44949	Subtidal	3	26	E2	April	C	High
27.png	Hard Coral	Porites	Massive	S	2	1.41421	Subtidal	3	26	C2	April		High
27.png	Substratum	Sand/Rubble			92	9.59166	Subtidal	3	26		April
28.png	Hard Coral	Acropora	Branching	S	17	4.12311	Subtidal	3	27	E2	April	C	High
28.png	Hard Coral	Acropora	Branching	D	12	3.4641	Subtidal	3	27	Turf	April	C	High
28.png	Substratum	Sand/Rubble			71	8.42615	Subtidal	3	27		April
29.png	Hard Coral	Acropora	Branching	UB	35	5.91608	Subtidal	3	28	E1	April	C	High
29.png	Hard Coral	Acropora	Branching	D	3	1.73205	Subtidal	3	28	Turf	April	C	High
29.png	Substratum	Sand/Rubble			62	7.87401	Subtidal	3	28		April
30.png	Substratum	Sand/Rubble			100	10	Subtidal	3	29		April
31.png	Substratum	Sand/Rubble			100	10	Subtidal	3	30		April
1.JPG	Substratum	Sand/Rubble			100	10	Subtidal	4	1		April
2.JPG	Hard Coral	Acropora	Branching	S	17	4.12311	Subtidal	4	2	E3	April	C	High
2.JPG	Substratum	Sand/Rubble			83	9.11043	Subtidal	4	2		April
3.JPG	Substratum	Sand/Rubble			100	10	Subtidal	4	3		April
4.JPG	Hard Coral	Acropora	Branching	S	36	6	Subtidal	4	4	E3	April	C	High
4.JPG	Hard Coral	Acropora	Branching	D	2	1.41421	Subtidal	4	4	Turf	April	C	High
4.JPG	Substratum	Sand/Rubble			62	7.87401	Subtidal	4	4		April
5.JPG	Hard Coral	Acropora	Branching	S	82	9.05539	Subtidal	4	5	E3	April	C	High
5.JPG	Substratum	Sand/Rubble			18	4.24264	Subtidal	4	5		April
6.JPG	Hard Coral	Acropora	Branching	S	34	5.83095	Subtidal	4	6	E1	April	C	High
6.JPG	Hard Coral	Acropora	Branching	D	23	4.79583	Subtidal	4	6	Turf	April	C	High
6.JPG	Substratum	Sand/Rubble			43	6.55744	Subtidal	4	6		April
7.JPG	Hard Coral	Acropora	Branching	S	17	4.12311	Subtidal	4	7	E1	April	C	High
7.JPG	Hard Coral	Acropora	Branching	D	79	8.88819	Subtidal	4	7	Dead	April	C	High
7.JPG	Substratum	Sand/Rubble			4	2	Subtidal	4	7		April
8.JPG	Hard Coral	Acropora	Branching	S	82	9.05539	Subtidal	4	8	E1	April	C	High
8.JPG	Hard Coral	Acropora	Branching	D	18	4.24264	Subtidal	4	8	Turf	April	C	High
9.JPG	Hard Coral	Acropora	Branching	S	95	9.74679	Subtidal	4	9	E1	April	C	High
9.JPG	Hard Coral	Acropora	Branching	D	5	2.23607	Subtidal	4	9	Turf	April	C	High
10.JPG	Hard Coral	Acropora	Branching	S	89	9.43398	Subtidal	4	10	E1	April	C	High
10.JPG	Hard Coral	Acropora	Branching	D	11	3.31662	Subtidal	4	10	Turf	April	C	High
11.JPG	Hard Coral	Acropora	Branching	S	46	6.78233	Subtidal	4	11	E1	April	C	High
11.JPG	Hard Coral	Acropora	Branching	D	11	3.31662	Subtidal	4	11	Turf	April	C	High
11.JPG	Substratum	Sand/Rubble			43	6.55744	Subtidal	4	11		April
12.JPG	Hard Coral	Acropora	Branching	S	33	5.74456	Subtidal	4	12	E1	April	C	High
12.JPG	Substratum	Sand/Rubble			67	8.18535	Subtidal	4	12		April
13.JPG	Hard Coral	Acropora	Branching	S	3	1.73205	Subtidal	4	13	E1	April	C	High
13.JPG	Substratum	Sand/Rubble			97	9.84886	Subtidal	4	13		April
14.JPG	Hard Coral	Acropora	Branching	S	1	1	Subtidal	4	14	E1	April	C	High
14.JPG	Substratum	Sand/Rubble			99	9.94987	Subtidal	4	14		April
15.JPG	Hard Coral	Acropora	Branching	UB	1	1	Subtidal	4	15	E4	April	C	High
15.JPG	Hard Coral	Acropora	Branching	S	5	2.23607	Subtidal	4	15	E1	April	C	High
15.JPG	Substratum	Sand/Rubble			94	9.69536	Subtidal	4	15		April
16.JPG	Hard Coral	Acropora	Branching	S	59	7.68115	Subtidal	4	16	E1	April	C	High
16.JPG	Hard Coral	Acropora	Branching	D	10	3.16228	Subtidal	4	16	Turf	April	C	High
16.JPG	Soft coral	Soft coral			3	1.73205	Subtidal	4	16		April
16.JPG	Substratum	Sand/Rubble			28	5.2915	Subtidal	4	16		April
17.JPG	Hard Coral	Acropora	Branching	S	25	5	Subtidal	4	17	E1	April	C	High
17.JPG	Hard Coral	Acropora	Branching	D	10	3.16228	Subtidal	4	17	Turf	April	C	High
17.JPG	Soft coral	Soft coral		M	8	2.82843	Subtidal	4	17	E4	April
17.JPG	Substratum	Sand/Rubble			57	7.54983	Subtidal	4	17		April
18.JPG	Hard Coral	Acropora	Branching	S	2	1.41421	Subtidal	4	18	E1	April	C	High
18.JPG	Seaweed	Green seaweed			6	2.44949	Subtidal	4	18		April
18.JPG	Substratum	Sand/Rubble			92	9.59166	Subtidal	4	18		April
19.JPG	Hard Coral	Acropora	Branching	D	9	3	Subtidal	4	19	Dead	April	C	High
19.JPG	Substratum	Sand/Rubble			91	9.53939	Subtidal	4	19		April
20.JPG	Soft coral	Soft coral			2	1.41421	Subtidal	4	20		April
20.JPG	Substratum	Sand/Rubble			98	9.89949	Subtidal	4	20		April
21.JPG	Hard Coral	Favites	Encrusting	S	4	2	Subtidal	4	21	D2	April	St	High
21.JPG	Substratum	Sand/Rubble			96	9.79796	Subtidal	4	21		April
22.JPG	Hard Coral	Favites	Encrusting	S	2	1.41421	Subtidal	4	22	E3	April	St	High
22.JPG	Substratum	Sand/Rubble			98	9.89949	Subtidal	4	22		April
23.JPG	Hard Coral	Pocillopora	Branching	D	8	2.82843	Subtidal	4	23	Dead	April	C	Low
23.JPG	Substratum	Sand/Rubble			92	9.59166	Subtidal	4	23		April
24.JPG	Hard Coral	Porites	Massive	S	1	1	Subtidal	4	24	E1	April		High
24.JPG	Seaweed	Green seaweed			2	1.41421	Subtidal	4	24		April
24.JPG	Substratum	Sand/Rubble			97	9.84886	Subtidal	4	24		April
25.JPG	Seaweed	Green seaweed			3	1.73205	Subtidal	4	25		April
25.JPG	Substratum	Sand/Rubble			97	9.84886	Subtidal	4	25		April
26.JPG	Seaweed	Green seaweed			2	1.41421	Subtidal	4	26		April
26.JPG	Substratum	Sand/Rubble			98	9.89949	Subtidal	4	26		April
27.JPG	Hard Coral	Seriatopora	Branching	S	4	2	Subtidal	4	27	E1	April	W	Low
27.JPG	Hard Coral	Seriatopora	Branching	D	3	1.73205	Subtidal	4	27	Turf	April	W	Low
27.JPG	Hard Coral	Montipora	Encrusting	UB	4	2	Subtidal	4	27	NA	April		Low
27.JPG	Hard Coral	Platygyra	Encrusting	S	3	1.73205	Subtidal	4	27	E2	April	St	High
27.JPG	Hard Coral	Lobophyllia	Massive	S	6	2.44949	Subtidal	4	27	D2	April	St	Low
27.JPG	Soft coral	Soft coral			4	2	Subtidal	4	27		April
27.JPG	Substratum	Sand/Rubble			76	8.7178	Subtidal	4	27		April
28.JPG	Hard Coral	Favites	Massive	S	6	2.44949	Subtidal	4	28	E1	April	St	High
28.JPG	Hard Coral	Montipora	Encrusting	UB	14	3.74166	Subtidal	4	28	NA	April		Low
28.JPG	Hard Coral	Lobophyllia	Massive	S	1	1	Subtidal	4	28	D2	April	St	Low
28.JPG	Soft coral	Soft coral		S	10	3.16228	Subtidal	4	28	D1	April
28.JPG	Seaweed	Green seaweed			2	1.41421	Subtidal	4	28		April
28.JPG	Substratum	Sand/Rubble			67	8.18535	Subtidal	4	28		April
29.JPG	Hard Coral	Stylophora	Branching	S	17	4.12311	Subtidal	4	29	E1	April	W	Low
29.JPG	Hard Coral	Dipsastraea	Massive	S	2	1.41421	Subtidal	4	29	D2	April	St	Low
29.JPG	Substratum	Sand/Rubble			81	9	Subtidal	4	29		April
30.JPG	Hard Coral	Stylophora	Branching	S	27	5.19615	Subtidal	4	30	E1	April	W	Low
30.JPG	Hard Coral	Porites	Massive	S	1	1	Subtidal	4	30	D2	April		High
30.JPG	Substratum	Sand/Rubble			72	8.48528	Subtidal	4	30		April
IMG_3193.JPG	Hard Coral	Porites	Massive	M	41	6.40312	Subtidal	5	1	E3	April		High
IMG_3193.JPG	Hard Coral	Turbinaria	Plating	M	11	3.31662	Subtidal	5	1	E6	April		Low
IMG_3193.JPG	Substratum	Sand/Rubble			48	6.9282	Subtidal	5	1		April
IMG_3194.JPG	Hard Coral	Turbinaria	Plating	S	3	1.73205	Subtidal	5	2	E3	April		Low
IMG_3194.JPG	Soft coral	Soft coral			1	1	Subtidal	5	2		April
IMG_3194.JPG	Substratum	Sand/Rubble			96	9.79796	Subtidal	5	2		April
IMG_3195.JPG	Substratum	Sand/Rubble			100	10	Subtidal	5	3		April
IMG_3196.JPG	Substratum	Sand/Rubble			100	10	Subtidal	5	4		April
IMG_3197.JPG	Hard Coral	Acropora	Branching	S	61	7.81025	Subtidal	5	5	E1	April	C	High
IMG_3197.JPG	Hard Coral	Acropora	Branching	D	23	4.79583	Subtidal	5	5	Turf	April	C	High
IMG_3197.JPG	Substratum	Sand/Rubble			16	4	Subtidal	5	5		April
IMG_3198.JPG	Hard Coral	Acropora	Branching	S	31	5.56776	Subtidal	5	6	E1	April	C	High
IMG_3198.JPG	Hard Coral	Acropora	Branching	D	44	6.63325	Subtidal	5	6	Turf	April	C	High
IMG_3198.JPG	Substratum	Sand/Rubble			25	5	Subtidal	5	6		April
IMG_3199.JPG	Hard Coral	Acropora	Branching	M	3	1.73205	Subtidal	5	7	E4	April	C	High
IMG_3199.JPG	Soft coral	Soft coral			9	3	Subtidal	5	7		April
IMG_3199.JPG	Seaweed	Green seaweed			10	3.16228	Subtidal	5	7		April
IMG_3199.JPG	Substratum	Sand/Rubble			78	8.83176	Subtidal	5	7		April
IMG_3200.JPG	Soft coral	Soft coral			4	2	Subtidal	5	8		April
IMG_3200.JPG	Seaweed	Green seaweed			10	3.16228	Subtidal	5	8		April
IMG_3200.JPG	Substratum	Sand/Rubble			86	9.27362	Subtidal	5	8		April
IMG_3201.JPG	Substratum	Sand/Rubble			100	10	Subtidal	5	9		April
IMG_3202.JPG	Substratum	Sand/Rubble			100	10	Subtidal	5	10		April
IMG_3203.JPG	Hard Coral	Acropora	Branching	S	12	3.4641	Subtidal	5	11	E1	April	C	High
IMG_3203.JPG	Substratum	Sand/Rubble			88	9.38083	Subtidal	5	11		April
IMG_3204.JPG	Substratum	Sand/Rubble			100	10	Subtidal	5	12		April
IMG_3205.JPG	Soft coral	Soft coral		M	32	5.65685	Subtidal	5	13	E2	April
IMG_3205.JPG	Substratum	Sand/Rubble			68	8.24621	Subtidal	5	13		April
IMG_3206.JPG	Hard Coral	Acropora	Branching	S	2	1.41421	Subtidal	5	14	E1	April	C	High
IMG_3206.JPG	Soft coral	Soft coral		M	35	5.91608	Subtidal	5	14	D2	April
IMG_3206.JPG	Substratum	Sand/Rubble			63	7.93725	Subtidal	5	14		April
IMG_3207.JPG	Hard Coral	Dipsastraea	Massive	S	1	1	Subtidal	5	15	E2	April	St	Low
IMG_3207.JPG	Soft coral	Soft coral			35	5.91608	Subtidal	5	15	D2	April
IMG_3207.JPG	Substratum	Sand/Rubble			64	8	Subtidal	5	15		April
IMG_3208.JPG	Hard Coral	Turbinaria	Plating	M	12	3.4641	Subtidal	5	16	E3	April		Low
IMG_3208.JPG	Substratum	Sand/Rubble			88	9.38083	Subtidal	5	16		April
IMG_3209.JPG	Hard Coral	Porites	Massive	M	5	2.23607	Subtidal	5	17	E4	April		High
IMG_3209.JPG	Hard Coral	Turbinaria	Plating	M	9	3	Subtidal	5	17	E5	April		Low
IMG_3209.JPG	Soft coral	Soft coral			2	1.41421	Subtidal	5	17		April
IMG_3209.JPG	Substratum	Sand/Rubble			84	9.16515	Subtidal	5	17		April
IMG_3210.JPG	Substratum	Sand/Rubble			100	10	Subtidal	5	18		April
IMG_3211.JPG	Hard Coral	Acropora	Branching	S	42	6.48074	Subtidal	5	19	E1	April	C	High
IMG_3211.JPG	Substratum	Sand/Rubble			58	7.61577	Subtidal	5	19		April
IMG_3212.JPG	Hard Coral	Acropora	Branching	S	58	7.61577	Subtidal	5	20	E1	April	C	High
IMG_3212.JPG	Hard Coral	Acropora	Branching	D	28	5.2915	Subtidal	5	20	Dead	April	C	High
IMG_3212.JPG	Substratum	Sand/Rubble			14	3.74166	Subtidal	5	20		April
IMG_3213.JPG	Hard Coral	Acropora	Branching	S	59	7.68115	Subtidal	5	21	E1	April	C	High
IMG_3213.JPG	Hard Coral	Acropora	Branching	D	6	2.44949	Subtidal	5	21	Dead	April	C	High
IMG_3213.JPG	Substratum	Sand/Rubble			35	5.91608	Subtidal	5	21		April
IMG_3214.JPG	Hard Coral	Acropora	Branching	S	6	2.44949	Subtidal	5	22	E1	April	C	High
IMG_3214.JPG	Hard Coral	Porites	Massive	S	4	2	Subtidal	5	22	E2	April		High
IMG_3214.JPG	Substratum	Sand/Rubble			90	9.48683	Subtidal	5	22		April
IMG_3215.JPG	Hard Coral	Acropora	Branching	S	4	2	Subtidal	5	23	E1	April	C	High
IMG_3215.JPG	Substratum	Sand/Rubble			96	9.79796	Subtidal	5	23		April
IMG_3216.JPG	Hard Coral	Acropora	Branching	S	44	6.63325	Subtidal	5	24	E1	April	C	High
IMG_3216.JPG	Hard Coral	Acropora	Branching	D	5	2.23607	Subtidal	5	24	Turf	April	C	High
IMG_3216.JPG	Hard Coral	Turbinaria	Plating	M	6	2.44949	Subtidal	5	24	NA	April		Low
IMG_3216.JPG	Soft coral	Soft coral		S	3	1.73205	Subtidal	5	24	D2	April
IMG_3216.JPG	Substratum	Sand/Rubble			42	6.48074	Subtidal	5	24		April
IMG_3217.JPG	Hard Coral	Acropora	Branching	S	6	2.44949	Subtidal	5	25	E1	April	C	High
IMG_3217.JPG	Hard Coral	Turbinaria	Plating	M	7	2.64575	Subtidal	5	25	NA	April		Low
IMG_3217.JPG	Soft coral	Soft coral		S	5	2.23607	Subtidal	5	25	D2	April
IMG_3217.JPG	Substratum	Sand/Rubble			82	9.05539	Subtidal	5	25		April
IMG_3218.JPG	Hard Coral	Acropora	Branching	S	18	4.24264	Subtidal	5	26	NA	April	C	High
IMG_3218.JPG	Hard Coral	Acropora	Branching	D	3	1.73205	Subtidal	5	26	Turf	April	C	High
IMG_3218.JPG	Hard Coral	Turbinaria	Plating	S	9	3	Subtidal	5	26	NA	April		Low
IMG_3218.JPG	Soft coral	Soft coral		S	8	2.82843	Subtidal	5	26	D2	April
IMG_3218.JPG	Substratum	Sand/Rubble			62	7.87401	Subtidal	5	26		April
IMG_3219.JPG	Hard Coral	Acropora	Branching	S	20	4.47214	Subtidal	5	27	NA	April	C	High
IMG_3219.JPG	Hard Coral	Turbinaria	Plating	M	11	3.31662	Subtidal	5	27	E4	April		Low
IMG_3219.JPG	Hard Coral	Turbinaria	Plating	S	10	3.16228	Subtidal	5	27	Dead	April		Low
IMG_3219.JPG	Substratum	Sand/Rubble			59	7.68115	Subtidal	5	27		April
IMG_3220.JPG	Hard Coral	Platygyra	Encrusting	M	3	1.73205	Subtidal	5	28	E4	April	St	High
IMG_3220.JPG	Soft coral	Soft coral			4	2	Subtidal	5	28		April
IMG_3220.JPG	Substratum	Sand/Rubble			93	9.64365	Subtidal	5	28		April
IMG_3221.JPG	Hard Coral	Acropora	Branching	S	14	3.74166	Subtidal	5	29	E3	April	C	High
IMG_3221.JPG	Hard Coral	Acropora	Branching	D	11	3.31662	Subtidal	5	29	Turf	April	C	High
IMG_3221.JPG	Hard Coral	Porites	Massive	S	5	2.23607	Subtidal	5	29	D2	April		High
IMG_3221.JPG	Substratum	Sand/Rubble			70	8.3666	Subtidal	5	29		April
IMG_3223.JPG	Hard Coral	Acropora	Branching	S	100	10	Subtidal	6	1	E1	April	C	High
IMG_3224.JPG	Hard Coral	Acropora	Branching	S	100	10	Subtidal	6	2	E1	April	C	High
IMG_3225.JPG	Hard Coral	Acropora	Branching	S	100	10	Subtidal	6	3	E1	April	C	High
IMG_3226.JPG	Hard Coral	Acropora	Branching	S	91	9.53939	Subtidal	6	4	E1	April	C	High
IMG_3226.JPG	Substratum	Sand/Rubble			9	3	Subtidal	6	4		April
IMG_3227.JPG	Hard Coral	Acropora	Branching	S	93	9.64365	Subtidal	6	5	E1	April	C	High
IMG_3227.JPG	Substratum	Sand/Rubble			7	2.64575	Subtidal	6	5		April
IMG_3228.JPG	Hard Coral	Acropora	Branching	S	87	9.32738	Subtidal	6	6	E1	April	C	High
IMG_3228.JPG	Substratum	Sand/Rubble			13	3.60555	Subtidal	6	6		April
IMG_3229.JPG	Hard Coral	Acropora	Branching	S	96	9.79796	Subtidal	6	7	E1	April	C	High
IMG_3229.JPG	Substratum	Sand/Rubble			4	2	Subtidal	6	7		April
IMG_3230.JPG	Hard Coral	Acropora	Branching	S	17	4.12311	Subtidal	6	8	NA	April	C	High
IMG_3230.JPG	Hard Coral	Acropora	Branching	S	42	6.48074	Subtidal	6	8	E2	April	C	High
IMG_3230.JPG	Substratum	Sand/Rubble			41	6.40312	Subtidal	6	8		April
IMG_3231.JPG	Hard Coral	Acropora	Branching	S	19	4.3589	Subtidal	6	9	E2	April	C	High
IMG_3231.JPG	Substratum	Sand/Rubble			81	9	Subtidal	6	9		April
IMG_3232.JPG	Hard Coral	Acropora	Branching	S	52	7.2111	Subtidal	6	10	E2	April	C	High
IMG_3232.JPG	Substratum	Sand/Rubble			48	6.9282	Subtidal	6	10		April
IMG_3233.JPG	Hard Coral	Acropora	Branching	S	58	7.61577	Subtidal	6	11	E2	April	C	High
IMG_3233.JPG	Substratum	Sand/Rubble			42	6.48074	Subtidal	6	11		April
IMG_3234.JPG	Hard Coral	Acropora	Branching	S	34	5.83095	Subtidal	6	12	E2	April	C	High
IMG_3234.JPG	Soft coral	Soft coral		S	61	7.81025	Subtidal	6	12	D2	April
IMG_3234.JPG	Substratum	Sand/Rubble			5	2.23607	Subtidal	6	12		April
IMG_3235.JPG	Hard Coral	Acropora	Branching	S	5	2.23607	Subtidal	6	13	E1	April	C	High
IMG_3235.JPG	Hard Coral	Seriatopora	Branching	S	8	2.82843	Subtidal	6	13	E1	April	W	Low
IMG_3235.JPG	Hard Coral	Seriatopora	Branching	D	6	2.44949	Subtidal	6	13	Turf	April	W	Low
IMG_3235.JPG	Hard Coral	Turbinaria	Plating	UB	33	5.74456	Subtidal	6	13	E6	April		Low
IMG_3235.JPG	Substratum	Sand/Rubble			48	6.9282	Subtidal	6	13		April
IMG_3236.JPG	Hard Coral	Acropora	Branching	S	33	5.74456	Subtidal	6	14	NA	April	C	High
IMG_3236.JPG	Hard Coral	Acropora	Branching	D	8	2.82843	Subtidal	6	14	Turf	April	C	High
IMG_3236.JPG	Substratum	Sand/Rubble			59	7.68115	Subtidal	6	14		April
IMG_3237.JPG	Hard Coral	Acropora	Branching	S	12	3.4641	Subtidal	6	15	NA	April	C	High
IMG_3237.JPG	Hard Coral	Acropora	Branching	D	40	6.32456	Subtidal	6	15	Turf	April	C	High
IMG_3237.JPG	Hard Coral	Pocillopora	Branching	S	3	1.73205	Subtidal	6	15	C2	April	W	Low
IMG_3237.JPG	Substratum	Sand/Rubble			45	6.7082	Subtidal	6	15		April
IMG_3238.JPG	Hard Coral	Acropora	Branching	UB	29	5.38516	Subtidal	6	16	E5	April	C	High
IMG_3238.JPG	Hard Coral	Acropora	Branching	S	19	4.3589	Subtidal	6	16	E1	April	C	High
IMG_3238.JPG	Substratum	Sand/Rubble			52	7.2111	Subtidal	6	16		April
IMG_3239.JPG	Hard Coral	Acropora	Branching	S	92	9.59166	Subtidal	6	17	E1	April	C	High
IMG_3239.JPG	Substratum	Sand/Rubble			8	2.82843	Subtidal	6	17		April
IMG_3240.JPG	Hard Coral	Acropora	Branching	S	29	5.38516	Subtidal	6	18	E2	April	C	High
IMG_3240.JPG	Hard Coral	Acropora	Branching	S	67	8.18535	Subtidal	6	18	NA	April	C	High
IMG_3240.JPG	Substratum	Sand/Rubble			4	2	Subtidal	6	18		April
IMG_3241.JPG	Hard Coral	Acropora	Branching	S	85	9.21954	Subtidal	6	19	E1	April	C	High
IMG_3241.JPG	Hard Coral	Acropora	Branching	D	7	2.64575	Subtidal	6	19	Turf	April	C	High
IMG_3241.JPG	Substratum	Sand/Rubble			8	2.82843	Subtidal	6	19		April
IMG_3242.JPG	Hard Coral	Acropora	Branching	S	83	9.11043	Subtidal	6	20	E1	April	C	High
IMG_3242.JPG	Hard Coral	Acropora	Branching	D	6	2.44949	Subtidal	6	20	Turf	April	C	High
IMG_3242.JPG	Substratum	Sand/Rubble			11	3.31662	Subtidal	6	20		April
IMG_3243.JPG	Hard Coral	Acropora	Branching	S	72	8.48528	Subtidal	6	21	E2	April	C	High
IMG_3243.JPG	Hard Coral	Acropora	Branching	S	16	4	Subtidal	6	21	NA	April	C	High
IMG_3243.JPG	Hard Coral	Pocillopora	Branching	S	2	1.41421	Subtidal	6	21	C2	April	W	Low
IMG_3243.JPG	Substratum	Sand/Rubble			10	3.16228	Subtidal	6	21		April
IMG_3244.JPG	Hard Coral	Acropora	Branching	S	65	8.06226	Subtidal	6	22	E2	April	C	High
IMG_3244.JPG	Substratum	Sand/Rubble			35	5.91608	Subtidal	6	22		April
IMG_3245.JPG	Hard Coral	Acropora	Branching	UB	6	2.44949	Subtidal	6	23	E5	April	C	High
IMG_3245.JPG	Substratum	Sand/Rubble			94	9.69536	Subtidal	6	23		April
IMG_3246.JPG	Hard Coral	Acropora	Branching	S	9	3	Subtidal	6	24	E2	April	C	High
IMG_3246.JPG	Hard Coral	Acropora	Branching	D	5	2.23607	Subtidal	6	24	Turf	April	C	High
IMG_3246.JPG	Substratum	Sand/Rubble			86	9.27362	Subtidal	6	24		April
IMG_3247.JPG	Hard Coral	Acropora	Branching	S	95	9.74679	Subtidal	6	25	E2	April	C	High
IMG_3247.JPG	Substratum	Sand/Rubble			5	2.23607	Subtidal	6	25		April
IMG_3248.JPG	Hard Coral	Acropora	Branching	S	77	8.77496	Subtidal	6	26	D2	April	C	High
IMG_3248.JPG	Substratum	Sand/Rubble			23	4.79583	Subtidal	6	26		April
IMG_3249.JPG	Hard Coral	Acropora	Branching	S	28	5.2915	Subtidal	6	27	D2	April	C	High
IMG_3249.JPG	Hard Coral	Pocillopora	Branching	M	6	2.44949	Subtidal	6	27	C2	April	W	Low
IMG_3249.JPG	Hard Coral	Seriatopora	Branching	S	8	2.82843	Subtidal	6	27	E1	April	W	Low
IMG_3249.JPG	Hard Coral	Seriatopora	Branching	D	4	2	Subtidal	6	27	Turf	April	W	Low
IMG_3249.JPG	Substratum	Sand/Rubble			54	7.34847	Subtidal	6	27		April
IMG_3250.JPG	Hard Coral	Acropora	Branching	M	11	3.31662	Subtidal	6	28	E5	April	C	High
IMG_3250.JPG	Hard Coral	Pocillopora	Branching	M	5	2.23607	Subtidal	6	28	C2	April	W	Low
IMG_3250.JPG	Hard Coral	Seriatopora	Branching	S	8	2.82843	Subtidal	6	28	E1	April	W	Low
IMG_3250.JPG	Substratum	Sand/Rubble			76	8.7178	Subtidal	6	28		April
IMG_3251.JPG	Hard Coral	Acropora	Branching	M	17	4.12311	Subtidal	6	29	E5	April	C	High
IMG_3251.JPG	Substratum	Sand/Rubble			83	9.11043	Subtidal	6	29		April
	Hard Coral	Acropora	Branching	UB	66	8.12404	Intertidal	1	1	E6	Okt	C	High
	Substrate	Sand/Rubble			34	5.83095	Intertidal	1	1		Okt
	Hard Coral	Acropora	Branching	UB	95	9.74679	Intertidal	1	2	E4	Okt	C	High
	Substrate	Sand/Rubble			5	2.23607	Intertidal	1	2		Okt
	Hard Coral	Acropora	Branching	UB	74	8.60233	Intertidal	1	3	E4+E5	Okt	C	High
	Substrate	Sand/Rubble			26	5.09902	Intertidal	1	3		Okt
	Hard Coral	Acropora	Branching	UB	61	7.81025	Intertidal	1	4	E4	Okt	C	High
	Seaweed	Brown-seaweed			10	3.16228	Intertidal	1	4		Okt
	Substrate	Sand/Rubble			29	5.38516	Intertidal	1	4		Okt
	Hard Coral	Acropora	Branching	UB	58	7.61577	Intertidal	1	5	E4	Okt	C	High
	Hard Coral	Acropora	Branching	M	2	1.41421	Intertidal	1	5	E2	Okt	C	High
	Seaweed	Green-seaweed			1	1	Intertidal	1	5		Okt
	Substrate	Sand/Rubble			39	6.245	Intertidal	1	5		Okt
	Hard Coral	Acropora	Branching	UB	45	6.7082	Intertidal	1	6	E4	Okt	C	High
	Seaweed	Brown-seaweed			15	3.87298	Intertidal	1	6		Okt
	Substrate	Sand/Rubble			40	6.32456	Intertidal	1	6		Okt
	Hard Coral	Acropora	Branching	UB	21	4.58258	Intertidal	1	7	E4	Okt	C	High
	Hard Coral	Galaxea	Encrusting	UB	3	1.73205	Intertidal	1	7	D4?	Okt	St	Low
	Substrate	Sand/Rubble			76	8.7178	Intertidal	1	7		Okt
	Hard Coral	Acropora	Branching	UB	13	3.60555	Intertidal	1	8	E5	Okt	C	High
	Hard Coral	Porites	Branching	UB	3	1.73205	Intertidal	1	8		Okt		High
	Hard Coral	Montastrea	Massive	UB	1	1	Intertidal	1	8	D2	Okt	St
	Substrate	Sand/Rubble			83	9.11043	Intertidal	1	8		Okt
	Hard Coral	Acropora	Branching	UB	45	6.7082	Intertidal	1	9	E5	Okt	C	High
	Substrate	Sand/Rubble			55	7.4162	Intertidal	1	9		Okt
	Hard Coral	Porites	Massive	UB	4	2	Intertidal	1	10	E4	Okt		High
	Substrate	Sand/Rubble			96	9.79796	Intertidal	1	10		Okt
	Hard Coral	Acropora	Branching	UB	1	1	Intertidal	1	11	E4	Okt	C	High
	Substrate	Sand/Rubble			99	9.94987	Intertidal	1	11		Okt
	Seaweed	CCA	UB		1	1	Intertidal	1	12		Okt
	Substrate	Sand/Rubble			99	9.94987	Intertidal	1	12		Okt
	Hard Coral	Unknown	Massive	D	1	1	Intertidal	1	13	B3	Okt
	Substrate	Sand/Rubble			99	9.94987	Intertidal	1	13		Okt
	Hard Coral	Acropora	Branching	UB	4	2	Intertidal	1	14	E4	Okt	C	High
	Seaweed	Green-seaweed			2	1.41421	Intertidal	1	14		Okt
	Substrate	Sand/Rubble			94	9.69536	Intertidal	1	14		Okt
	Hard Coral	Montastrea	massive	UB	1	1	Intertidal	1	15	D2	Okt	St
	Substrate	Sand/Rubble			99	9.94987	Intertidal	1	15		Okt
	Hard Coral	Acropora	Branching	UB	3	1.73205	Intertidal	1	16	E4	Okt	C	High
	Seaweed	Green-seaweed			6	2.44949	Intertidal	1	16		Okt
	Substrate	Sand/Rubble			91	9.53939	Intertidal	1	16		Okt
	Hard Coral	Acropora	Branching	UB	1	1	Intertidal	1	17	E5	Okt	C	High
	Substrate	Sand/Rubble			99	9.94987	Intertidal	1	17		Okt
	Hard Coral	Acropora	Branching	UB	2	1.41421	Intertidal	1	18	E5	Okt	C	High
	Seaweed	CCA	UB		2	1.41421	Intertidal	1	18		Okt
	Substrate	Sand/Rubble			96	9.79796	Intertidal	1	18		Okt
	Hard Coral	Dipsastraea	Massive	UB	1	1	Intertidal	1	19	E4	Okt	St	Low
	Substrate	Sand/Rubble			99	9.94987	Intertidal	1	19		Okt
	Hard Coral	Acropora	Branching	UB	1	1	Intertidal	1	20	E4	Okt	C	High
	Seaweed	CCA	UB		1	1	Intertidal	1	20		Okt
	Seaweed	Green-seaweed			2	1.41421	Intertidal	1	20		Okt
	Substrate	Rock			1	1	Intertidal	1	20		Okt
	Substrate	Sand/Rubble			95	9.74679	Intertidal	1	20		Okt
	Hard Coral	Acropora	Branching	UB	2	1.41421	Intertidal	1	21	E4	Okt	C	High
	Seaweed	Green-seaweed			8	2.82843	Intertidal	1	21		Okt
	Substrate	Sand/Rubble			90	9.48683	Intertidal	1	21		Okt
	Hard Coral	Acropora	Branching	UB	4	2	Intertidal	1	22	E5	Okt	C	High
	Seaweed	CCA	UB		2	1.41421	Intertidal	1	22		Okt
	Seaweed	Green-seaweed			1	1	Intertidal	1	22		Okt
	Substrate	Sand/Rubble			93	9.64365	Intertidal	1	22		Okt
	Hard Coral	Acropora	Branching	UB	4	2	Intertidal	1	23	E5	Okt	C	High
	Hard Coral	Porites	Massive	UB	6	2.44949	Intertidal	1	23	E4	Okt		High
	Substrate	Rock			1	1	Intertidal	1	23		Okt
	Substrate	Sand/Rubble			89	9.43398	Intertidal	1	23		Okt
	Hard Coral	Acropora	Branching	UB	7	2.64575	Intertidal	1	24	E4	Okt	C	High
	Hard Coral	Porites	Massive	UB	6	2.44949	Intertidal	1	24	E4	Okt		High
	Substrate	Sand/Rubble			87	9.32738	Intertidal	1	24		Okt
	Hard Coral	Unknown	Massive	D	16	4	Intertidal	1	25	NA	Okt
	Seaweed	Green-seaweed			9	3	Intertidal	1	25		Okt
	Substrate	Sand/Rubble			75	8.66025	Intertidal	1	25		Okt
	Seaweed	Green-seaweed			6	2.44949	Intertidal	1	26		Okt
	Substrate	Sand/Rubble			94	9.69536	Intertidal	1	26		Okt
	Hard Coral	Acropora	Branching	UB	1	1	Intertidal	1	27	E4	Okt	C	High
	Seaweed	CCA		UB	3	1.73205	Intertidal	1	27	B3+C3	Okt
	Hard Coral	Montastrea	Massive	UB	1	1	Intertidal	1	27	E4	Okt	St
	Hard Coral	Unknown	Massive	D	3	1.73205	Intertidal	1	27	NA	Okt
	Seaweed	Green-seaweed			2	1.41421	Intertidal	1	27		Okt
	Substrate	Sand/Rubble			90	9.48683	Intertidal	1	27		Okt
	Hard Coral	Acropora	Branching	UB	6	2.44949	Intertidal	1	28	B5	Okt	C	High
	Hard Coral	Acropora	Branching	M	2	1.41421	Intertidal	1	28	B2	Okt	C	High
	Substrate	Sand/Rubble			92	9.59166	Intertidal	1	28		Okt
	Hard Coral	Acropora	Branching	UB	14	3.74166	Intertidal	1	29	B3	Okt	C	High
	Seaweed	Red-seaweed			8	2.82843	Intertidal	1	29		Okt
	Substrate	Sand/Rubble			78	8.83176	Intertidal	1	29		Okt
	Hard Coral	Acropora	Branching	UB	87	9.32738	Intertidal	1	30	B5	Okt	C	High
	Hard Coral	Acropora	Branching	M	5	2.23607	Intertidal	1	30	E4	Okt	C	High
	Seaweed	Red-seaweed			8	2.82843	Intertidal	1	30		Okt
[truncated: 1,394 more rows]
